# Supplementary material
Source: publisher figshare collection journal article supplement (https://acs.figshare.com/ndownloader/files/8171081)
Supplement: Supplementary file 1 [file 8171081]

 
data_masa1002
 
_audit_creation_method            'SHELXL-2014/7'
_shelx_SHELXL_version_number      '2014/7'
_chemical_name_systematic         ?
_chemical_name_common             ?
_chemical_melting_point           ?
_chemical_formula_moiety          'C50 H47 Cl6 O6 P3 S3'
_chemical_formula_sum
 'C50 H47 Cl6 O6 P3 S3' 
_chemical_formula_weight          1145.66

loop_
 _atom_type_symbol
 _atom_type_description
 _atom_type_scat_dispersion_real
 _atom_type_scat_dispersion_imag
 _atom_type_scat_source
 'C'  'C'   0.0033   0.0016
 'International Tables Vol C Tables 4.2.6.8 and 6.1.1.4'
 'H'  'H'   0.0000   0.0000
 'International Tables Vol C Tables 4.2.6.8 and 6.1.1.4'
 'O'  'O'   0.0106   0.0060
 'International Tables Vol C Tables 4.2.6.8 and 6.1.1.4'
 'P'  'P'   0.1023   0.0942
 'International Tables Vol C Tables 4.2.6.8 and 6.1.1.4'
 'S'  'S'   0.1246   0.1234
 'International Tables Vol C Tables 4.2.6.8 and 6.1.1.4'
 'Cl'  'Cl'   0.1484   0.1585
 'International Tables Vol C Tables 4.2.6.8 and 6.1.1.4'
 
_space_group_crystal_system       monoclinic
_space_group_IT_number            14
_space_group_name_H-M_alt         'P 21/n'
_space_group_name_Hall            '-P 2yn'
 
_shelx_space_group_comment
;
The symmetry employed for this shelxl refinement is uniquely defined
by the following loop, which should always be used as a source of
symmetry information in preference to the above space-group names.
They are only intended as comments.
;
 
loop_
 _space_group_symop_operation_xyz
 'x, y, z'
 '-x+1/2, y+1/2, -z+1/2'
 '-x, -y, -z'
 'x-1/2, -y-1/2, z-1/2'
 
_cell_length_a                    9.1387(10)
_cell_length_b                    20.645(2)
_cell_length_c                    28.401(3)
_cell_angle_alpha                 90
_cell_angle_beta                  91.9110(10)
_cell_angle_gamma                 90
_cell_volume                      5355.4(10)
_cell_formula_units_Z             4
_cell_measurement_temperature     100(2)
_cell_measurement_reflns_used     9473
_cell_measurement_theta_min       2.37
_cell_measurement_theta_max       28.11
 
_exptl_crystal_description        needle
_exptl_crystal_colour             yellow
_exptl_crystal_density_meas       ?
_exptl_crystal_density_method     ?
_exptl_crystal_density_diffrn     1.421          
_exptl_crystal_F_000              2360
_exptl_transmission_factor_min    0.986
_exptl_transmission_factor_max    0.989
_exptl_crystal_size_max           0.27
_exptl_crystal_size_mid           0.02
_exptl_crystal_size_min           0.02
_exptl_absorpt_coefficient_mu     0.575
_shelx_estimated_absorpt_T_min    ?
_shelx_estimated_absorpt_T_max    ?
_exptl_absorpt_correction_type    multi-scan
_exptl_absorpt_correction_T_min   ?
_exptl_absorpt_correction_T_max   ?
_exptl_absorpt_process_details    'XPREP; Bruker AXS 2008'
_exptl_absorpt_special_details    'SADABS-2008/1 - Bruker AXS 2008'
_diffrn_ambient_temperature       100(2)
_diffrn_radiation_wavelength      0.71073
_diffrn_radiation_type            MoK\a
_diffrn_source                    'Bruker TXS fine-focus rotating anode'
_diffrn_measurement_device_type   'Bruker APEXII CCD area-detector'
_diffrn_measurement_method        '\f and \w'
_diffrn_detector_area_resol_mean  ?
_diffrn_reflns_number             60727
_diffrn_reflns_av_unetI/netI      0.0323
_diffrn_reflns_av_R_equivalents   0.0369
_diffrn_reflns_limit_h_min        -12
_diffrn_reflns_limit_h_max        12
_diffrn_reflns_limit_k_min        -27
_diffrn_reflns_limit_k_max        27
_diffrn_reflns_limit_l_min        -37
_diffrn_reflns_limit_l_max        38
_diffrn_reflns_theta_min          1.220
_diffrn_reflns_theta_max          28.564
_diffrn_reflns_theta_full         25.242
_diffrn_measured_fraction_theta_max   0.930
_diffrn_measured_fraction_theta_full  1.000
_diffrn_reflns_Laue_measured_fraction_max    0.930
_diffrn_reflns_Laue_measured_fraction_full   1.000
_diffrn_reflns_point_group_measured_fraction_max   0.930
_diffrn_reflns_point_group_measured_fraction_full  1.000
_reflns_number_total              12708
_reflns_number_gt                 10082
_reflns_threshold_expression      'I > 2\s(I)'
_reflns_Friedel_coverage          0.000
_reflns_Friedel_fraction_max      .
_reflns_Friedel_fraction_full     .
 
_reflns_special_details
;
 Reflections were merged by SHELXL according to the crystal
 class for the calculation of statistics and refinement.
 
 _reflns_Friedel_fraction is defined as the number of unique
 Friedel pairs measured divided by the number that would be
 possible theoretically, ignoring centric projections and
 systematic absences.
;
 
_computing_data_collection        'Bruker APEX2 (Bruker 2008)'
_computing_cell_refinement        'Bruker SAINT (Bruker 2008)'
_computing_data_reduction         'Bruker SAINT and XPREP (Bruker 2008)'
_computing_structure_solution     'SHELXS97 (Sheldrick, 2008)'
_computing_structure_refinement 'SHELXL-2014/7 (Sheldrick, 2014)'
_computing_molecular_graphics     'XSHEL (Bruker, 2002)'
_computing_publication_material   'XCIF (Bruker, 2001)'
_refine_special_details           ?
_refine_ls_structure_factor_coef  Fsqd
_refine_ls_matrix_type            full
_refine_ls_weighting_scheme       calc
_refine_ls_weighting_details
'w=1/[\s^2^(Fo^2^)+(0.0706P)^2^+13.3116P] where P=(Fo^2^+2Fc^2^)/3'
_atom_sites_solution_primary      ?
_atom_sites_solution_secondary    ?
_atom_sites_solution_hydrogens    geom
_refine_ls_hydrogen_treatment     constr
_refine_ls_extinction_method      none
_refine_ls_extinction_coef        .
_refine_ls_number_reflns          12708
_refine_ls_number_parameters      621
_refine_ls_number_restraints      0
_refine_ls_R_factor_all           0.0748
_refine_ls_R_factor_gt            0.0574
_refine_ls_wR_factor_ref          0.1572
_refine_ls_wR_factor_gt           0.1475
_refine_ls_goodness_of_fit_ref    1.040
_refine_ls_restrained_S_all       1.040
_refine_ls_shift/su_max           0.002
_refine_ls_shift/su_mean          0.000
 
loop_
 _atom_site_label
 _atom_site_type_symbol
 _atom_site_fract_x
 _atom_site_fract_y
 _atom_site_fract_z
 _atom_site_U_iso_or_equiv
 _atom_site_adp_type
 _atom_site_occupancy
 _atom_site_site_symmetry_order  
 _atom_site_calc_flag
 _atom_site_refinement_flags_posn
 _atom_site_refinement_flags_adp
 _atom_site_refinement_flags_occupancy
 _atom_site_disorder_assembly
 _atom_site_disorder_group
C1 C 0.3603(3) 0.38377(13) 0.90427(9) 0.0146(5) Uani 1 1 d . . . . .
C2 C 0.3293(3) 0.41462(14) 0.94697(10) 0.0163(5) Uani 1 1 d . . . . .
C3 C 0.3060(3) 0.37666(14) 0.98907(10) 0.0169(5) Uani 1 1 d . . . . .
C4 C 0.3184(3) 0.31007(14) 0.98843(10) 0.0158(5) Uani 1 1 d . . . . .
C5 C 0.3022(3) 0.17990(14) 0.98579(9) 0.0151(5) Uani 1 1 d . . . . .
C6 C 0.2702(3) 0.11342(14) 0.98158(10) 0.0161(5) Uani 1 1 d . . . . .
C7 C 0.2725(3) 0.08176(14) 0.93623(10) 0.0166(5) Uani 1 1 d . . . . .
C8 C 0.3090(3) 0.11619(13) 0.89635(10) 0.0152(5) Uani 1 1 d . . . . .
C9 C 0.3503(3) 0.18218(13) 0.81674(10) 0.0153(5) Uani 1 1 d . . . . .
C10 C 0.3515(3) 0.21899(13) 0.77533(9) 0.0149(5) Uani 1 1 d . . . . .
C11 C 0.3639(3) 0.28931(13) 0.77751(9) 0.0150(5) Uani 1 1 d . . . . .
C12 C 0.3754(3) 0.32182(13) 0.82048(9) 0.0138(5) Uani 1 1 d . . . . .
C13 C 0.3734(3) 0.31601(13) 0.90540(9) 0.0142(5) Uani 1 1 d . . . . .
C14 C 0.3548(3) 0.28037(14) 0.94610(9) 0.0144(5) Uani 1 1 d . . . . .
C15 C 0.3439(3) 0.21158(13) 0.94444(9) 0.0142(5) Uani 1 1 d . . . . .
C16 C 0.3485(3) 0.18076(14) 0.90153(10) 0.0158(5) Uani 1 1 d . . . . .
C17 C 0.3684(3) 0.21677(13) 0.85915(9) 0.0147(5) Uani 1 1 d . . . . .
C18 C 0.3813(3) 0.28319(13) 0.86112(9) 0.0138(5) Uani 1 1 d . . . . .
P1 P 0.35659(7) 0.40624(3) 0.84104(2) 0.01296(14) Uani 1 1 d . . . . .
P2 P 0.28001(8) 0.24452(4) 1.03035(2) 0.01510(15) Uani 1 1 d . . . . .
P3 P 0.29696(8) 0.09896(3) 0.83309(2) 0.01451(15) Uani 1 1 d . . . . .
S1 S 0.17823(8) 0.44863(4) 0.81807(3) 0.01959(16) Uani 1 1 d . . . . .
S2 S 0.09186(8) 0.24851(4) 1.06043(3) 0.02338(17) Uani 1 1 d . . . . .
S3 S 0.10376(8) 0.07234(4) 0.80889(3) 0.02115(16) Uani 1 1 d . . . . .
C19 C 0.5246(3) 0.44748(14) 0.82817(9) 0.0154(5) Uani 1 1 d . . . . .
C20 C 0.6574(3) 0.41605(15) 0.83784(11) 0.0209(6) Uani 1 1 d . . . . .
H1 H 0.6589 0.3764 0.8534 0.025 Uiso 1 1 calc R U . . .
C21 C 0.7870(3) 0.44414(17) 0.82414(12) 0.0268(7) Uani 1 1 d . . . . .
H2 H 0.8757 0.4232 0.8302 0.032 Uiso 1 1 calc R U . . .
C22 C 0.7841(4) 0.50356(18) 0.80143(12) 0.0301(7) Uani 1 1 d . . . . .
H3 H 0.8712 0.5221 0.7920 0.036 Uiso 1 1 calc R U . . .
C23 C 0.6534(4) 0.53560(17) 0.79265(12) 0.0297(7) Uani 1 1 d . . . . .
H4 H 0.6529 0.5759 0.7780 0.036 Uiso 1 1 calc R U . . .
C24 C 0.5219(3) 0.50727(15) 0.80578(11) 0.0218(6) Uani 1 1 d . . . . .
H5 H 0.4334 0.5283 0.7996 0.026 Uiso 1 1 calc R U . . .
C25 C 0.4366(3) 0.24155(14) 1.07074(10) 0.0192(6) Uani 1 1 d . . . . .
C26 C 0.5740(3) 0.22734(15) 1.05383(11) 0.0229(6) Uani 1 1 d . . . . .
H6 H 0.5848 0.2182 1.0221 0.027 Uiso 1 1 calc R U . . .
C27 C 0.6955(4) 0.22694(16) 1.08489(13) 0.0297(7) Uani 1 1 d . . . . .
H7 H 0.7878 0.2180 1.0737 0.036 Uiso 1 1 calc R U . . .
C28 C 0.6794(4) 0.23970(16) 1.13198(13) 0.0323(8) Uani 1 1 d . . . . .
H8 H 0.7607 0.2388 1.1526 0.039 Uiso 1 1 calc R U . . .
C29 C 0.5448(5) 0.2536(2) 1.14848(13) 0.0454(10) Uani 1 1 d . . . . .
H9 H 0.5350 0.2623 1.1804 0.055 Uiso 1 1 calc R U . . .
C30 C 0.4211(4) 0.2550(2) 1.11819(12) 0.0357(8) Uani 1 1 d . . . . .
H10 H 0.3296 0.2649 1.1297 0.043 Uiso 1 1 calc R U . . .
C31 C 0.4435(3) 0.04256(14) 0.82227(10) 0.0177(6) Uani 1 1 d . . . . .
C32 C 0.5885(3) 0.05924(16) 0.83393(11) 0.0240(6) Uani 1 1 d . . . . .
H11 H 0.6110 0.1002 0.8457 0.029 Uiso 1 1 calc R U . . .
C33 C 0.6985(4) 0.01398(19) 0.82770(12) 0.0317(8) Uani 1 1 d . . . . .
H12 H 0.7955 0.0248 0.8349 0.038 Uiso 1 1 calc R U . . .
C34 C 0.6642(4) -0.04740(19) 0.81070(12) 0.0355(8) Uani 1 1 d . . . . .
H13 H 0.7384 -0.0776 0.8069 0.043 Uiso 1 1 calc R U . . .
C35 C 0.5216(4) -0.06391(18) 0.79949(13) 0.0359(8) Uani 1 1 d . . . . .
H14 H 0.4995 -0.1053 0.7884 0.043 Uiso 1 1 calc R U . . .
C36 C 0.4105(4) -0.01877(16) 0.80474(11) 0.0262(7) Uani 1 1 d . . . . .
H15 H 0.3143 -0.0296 0.7965 0.031 Uiso 1 1 calc R U . . .
O1 O 0.3107(2) 0.47866(10) 0.95384(7) 0.0217(4) Uani 1 1 d . . . . .
C37 C 0.3809(4) 0.52421(14) 0.92322(11) 0.0230(6) Uani 1 1 d . . . . .
H16 H 0.3373 0.5219 0.8917 0.028 Uiso 1 1 calc R U . . .
H17 H 0.4845 0.5146 0.9217 0.028 Uiso 1 1 calc R U . . .
C38 C 0.3590(4) 0.59047(15) 0.94369(12) 0.0285(7) Uani 1 1 d . . . . .
H18 H 0.2564 0.6006 0.9430 0.043 Uiso 1 1 calc R U . . .
H19 H 0.4099 0.6219 0.9255 0.043 Uiso 1 1 calc R U . . .
H20 H 0.3966 0.5913 0.9756 0.043 Uiso 1 1 calc R U . . .
O2 O 0.2737(2) 0.40819(10) 1.02971(7) 0.0199(4) Uani 1 1 d . . . . .
C39 C 0.1244(4) 0.43177(17) 1.03138(12) 0.0275(7) Uani 1 1 d . . . . .
H21 H 0.0573 0.3958 1.0348 0.033 Uiso 1 1 calc R U . . .
H22 H 0.0978 0.4546 1.0025 0.033 Uiso 1 1 calc R U . . .
C40 C 0.1159(5) 0.4762(2) 1.07233(15) 0.0507(11) Uani 1 1 d . . . . .
H23 H 0.1541 0.4549 1.1001 0.076 Uiso 1 1 calc R U . . .
H24 H 0.0156 0.4881 1.0767 0.076 Uiso 1 1 calc R U . . .
H25 H 0.1724 0.5144 1.0666 0.076 Uiso 1 1 calc R U . . .
O3 O 0.2262(2) 0.07445(10) 1.01690(7) 0.0194(4) Uani 1 1 d . . . . .
C41 C 0.2961(3) 0.08147(15) 1.06302(10) 0.0209(6) Uani 1 1 d . . . . .
H26 H 0.2418 0.0571 1.0858 0.025 Uiso 1 1 calc R U . . .
H27 H 0.2949 0.1267 1.0722 0.025 Uiso 1 1 calc R U . . .
C42 C 0.4510(4) 0.0578(2) 1.06321(13) 0.0343(8) Uani 1 1 d . . . . .
H28 H 0.4524 0.0133 1.0533 0.051 Uiso 1 1 calc R U . . .
H29 H 0.4936 0.0612 1.0945 0.051 Uiso 1 1 calc R U . . .
H30 H 0.5062 0.0836 1.0420 0.051 Uiso 1 1 calc R U . . .
O4 O 0.2489(2) 0.01681(10) 0.93240(7) 0.0187(4) Uani 1 1 d . . . . .
C43 C 0.1052(3) -0.00833(15) 0.94149(11) 0.0226(6) Uani 1 1 d . . . . .
H31 H 0.0439 -0.0078 0.9129 0.027 Uiso 1 1 calc R U . . .
H32 H 0.0585 0.0176 0.9652 0.027 Uiso 1 1 calc R U . . .
C44 C 0.1271(4) -0.07599(17) 0.95851(18) 0.0458(11) Uani 1 1 d . . . . .
H33 H 0.1841 -0.0995 0.9365 0.069 Uiso 1 1 calc R U . . .
H34 H 0.0336 -0.0966 0.9613 0.069 Uiso 1 1 calc R U . . .
H35 H 0.1775 -0.0754 0.9887 0.069 Uiso 1 1 calc R U . . .
O5 O 0.3379(2) 0.19625(10) 0.73097(7) 0.0189(4) Uani 1 1 d . . . . .
C45 C 0.3822(4) 0.13063(14) 0.72165(10) 0.0209(6) Uani 1 1 d . . . . .
H36 H 0.3081 0.1004 0.7316 0.025 Uiso 1 1 calc R U . . .
H37 H 0.4735 0.1208 0.7386 0.025 Uiso 1 1 calc R U . . .
C46 C 0.4014(4) 0.12556(16) 0.66934(11) 0.0293(7) Uani 1 1 d . . . . .
H38 H 0.3101 0.1351 0.6531 0.044 Uiso 1 1 calc R U . . .
H39 H 0.4317 0.0824 0.6616 0.044 Uiso 1 1 calc R U . . .
H40 H 0.4744 0.1559 0.6600 0.044 Uiso 1 1 calc R U . . .
O6 O 0.3571(2) 0.31682(10) 0.73410(7) 0.0196(4) Uani 1 1 d . . . . .
C47 C 0.4330(3) 0.37672(14) 0.72704(10) 0.0201(6) Uani 1 1 d . . . . .
H41 H 0.5300 0.3751 0.7419 0.024 Uiso 1 1 calc R U . . .
H42 H 0.3797 0.4124 0.7405 0.024 Uiso 1 1 calc R U . . .
C48 C 0.4437(4) 0.38563(16) 0.67449(11) 0.0264(7) Uani 1 1 d . . . . .
H43 H 0.5012 0.3513 0.6619 0.040 Uiso 1 1 calc R U . . .
H44 H 0.4892 0.4265 0.6682 0.040 Uiso 1 1 calc R U . . .
H45 H 0.3473 0.3848 0.6600 0.040 Uiso 1 1 calc R U . . .
C49 C 0.9113(4) 0.2725(3) 0.94470(17) 0.0628(15) Uani 1 1 d . . . A 1
H46 H 0.9507 0.2775 0.9770 0.075 Uiso 1 1 calc R U . A 1
Cl1 Cl 0.72115(12) 0.28659(9) 0.94478(4) 0.0750(5) Uani 1 1 d . . . A 1
Cl2 Cl 0.99442(11) 0.33028(6) 0.90931(4) 0.0498(3) Uani 1 1 d . . . A 1
Cl3 Cl 0.95387(16) 0.19441(8) 0.92542(8) 0.1012(7) Uani 1 1 d . . . A 1
C50 C 0.8498(4) 0.2226(2) 0.78284(13) 0.0360(8) Uani 1 1 d . . . . .
H47 H 0.8997 0.1810 0.7878 0.043 Uiso 1 1 calc R U . . .
Cl4 Cl 0.74640(16) 0.21917(8) 0.72903(4) 0.0705(4) Uani 1 1 d . . . . .
Cl5 Cl 0.98121(11) 0.28401(6) 0.78230(4) 0.0473(3) Uani 1 1 d . . . . .
Cl6 Cl 0.72760(11) 0.23462(5) 0.82854(4) 0.0445(2) Uani 1 1 d . . . . .
 
loop_
 _atom_site_aniso_label
 _atom_site_aniso_U_11
 _atom_site_aniso_U_22
 _atom_site_aniso_U_33
 _atom_site_aniso_U_23
 _atom_site_aniso_U_13
 _atom_site_aniso_U_12
C1 0.0121(12) 0.0181(13) 0.0135(13) 0.0014(10) -0.0005(10) -0.0024(10)
C2 0.0136(13) 0.0193(14) 0.0161(13) -0.0006(10) -0.0003(10) 0.0007(10)
C3 0.0152(13) 0.0224(14) 0.0130(13) -0.0026(10) -0.0002(10) 0.0005(10)
C4 0.0123(12) 0.0229(14) 0.0122(13) 0.0019(10) -0.0006(10) 0.0003(10)
C5 0.0121(12) 0.0201(13) 0.0129(13) 0.0018(10) -0.0008(10) 0.0005(10)
C6 0.0135(13) 0.0213(14) 0.0133(13) 0.0054(10) -0.0002(10) 0.0000(10)
C7 0.0137(13) 0.0169(13) 0.0190(14) 0.0018(10) -0.0006(10) 0.0001(10)
C8 0.0146(13) 0.0175(13) 0.0134(13) 0.0010(10) 0.0004(10) -0.0004(10)
C9 0.0144(13) 0.0160(13) 0.0154(13) 0.0005(10) 0.0004(10) -0.0019(10)
C10 0.0147(13) 0.0184(13) 0.0116(12) -0.0003(10) -0.0009(10) -0.0001(10)
C11 0.0149(13) 0.0189(13) 0.0111(12) 0.0036(10) -0.0018(10) -0.0015(10)
C12 0.0125(12) 0.0149(12) 0.0141(13) 0.0012(10) 0.0003(10) -0.0018(10)
C13 0.0092(12) 0.0188(13) 0.0146(13) 0.0001(10) 0.0009(10) -0.0002(10)
C14 0.0109(12) 0.0212(14) 0.0110(12) 0.0005(10) -0.0008(9) -0.0004(10)
C15 0.0117(12) 0.0194(13) 0.0114(12) 0.0014(10) -0.0007(9) -0.0009(10)
C16 0.0142(13) 0.0198(14) 0.0133(13) 0.0024(10) -0.0004(10) -0.0020(10)
C17 0.0134(12) 0.0187(13) 0.0120(12) 0.0013(10) 0.0003(10) -0.0011(10)
C18 0.0117(12) 0.0169(13) 0.0130(13) 0.0007(10) 0.0002(9) -0.0013(10)
P1 0.0115(3) 0.0148(3) 0.0126(3) 0.0013(2) 0.0001(2) 0.0000(2)
P2 0.0140(3) 0.0210(4) 0.0103(3) 0.0014(3) 0.0005(2) 0.0000(3)
P3 0.0155(3) 0.0157(3) 0.0122(3) 0.0003(3) -0.0002(3) -0.0024(3)
S1 0.0138(3) 0.0240(4) 0.0208(4) 0.0018(3) -0.0018(3) 0.0040(3)
S2 0.0182(4) 0.0316(4) 0.0207(4) 0.0026(3) 0.0067(3) 0.0017(3)
S3 0.0178(3) 0.0243(4) 0.0211(4) -0.0008(3) -0.0025(3) -0.0057(3)
C19 0.0151(13) 0.0185(13) 0.0126(12) -0.0004(10) 0.0008(10) -0.0028(10)
C20 0.0162(14) 0.0214(15) 0.0252(15) -0.0010(12) -0.0003(11) -0.0008(11)
C21 0.0158(14) 0.0367(18) 0.0280(17) -0.0026(14) 0.0007(12) -0.0041(12)
C22 0.0253(16) 0.043(2) 0.0221(16) 0.0009(14) 0.0027(13) -0.0171(14)
C23 0.0326(18) 0.0301(17) 0.0261(17) 0.0091(13) -0.0020(14) -0.0134(14)
C24 0.0236(15) 0.0211(15) 0.0204(15) 0.0057(11) -0.0022(12) -0.0020(11)
C25 0.0223(14) 0.0201(14) 0.0148(13) 0.0035(11) -0.0022(11) -0.0019(11)
C26 0.0208(15) 0.0252(15) 0.0224(15) -0.0036(12) -0.0044(12) -0.0001(12)
C27 0.0224(16) 0.0215(15) 0.044(2) -0.0022(14) -0.0105(14) -0.0009(12)
C28 0.0352(19) 0.0269(17) 0.0334(19) 0.0050(14) -0.0205(15) -0.0061(14)
C29 0.047(2) 0.070(3) 0.0181(17) 0.0018(17) -0.0119(16) -0.010(2)
C30 0.0304(18) 0.062(3) 0.0146(15) -0.0016(15) -0.0019(13) -0.0037(17)
C31 0.0212(14) 0.0208(14) 0.0112(13) 0.0034(10) 0.0021(10) 0.0015(11)
C32 0.0212(15) 0.0267(16) 0.0244(16) 0.0075(12) 0.0016(12) -0.0018(12)
C33 0.0215(16) 0.049(2) 0.0252(17) 0.0105(15) 0.0057(13) 0.0069(14)
C34 0.038(2) 0.046(2) 0.0221(17) -0.0006(15) 0.0066(14) 0.0212(17)
C35 0.050(2) 0.0297(18) 0.0278(18) -0.0102(14) -0.0030(16) 0.0131(16)
C36 0.0313(17) 0.0266(16) 0.0204(15) -0.0038(12) -0.0033(13) 0.0056(13)
O1 0.0301(12) 0.0168(10) 0.0185(10) -0.0015(8) 0.0055(9) 0.0006(8)
C37 0.0267(16) 0.0196(14) 0.0228(15) 0.0010(12) 0.0022(12) -0.0023(12)
C38 0.0343(18) 0.0204(15) 0.0307(17) -0.0032(13) -0.0024(14) -0.0018(13)
O2 0.0232(11) 0.0234(11) 0.0131(10) -0.0036(8) 0.0014(8) 0.0025(8)
C39 0.0272(17) 0.0328(18) 0.0230(16) -0.0011(13) 0.0061(13) 0.0098(13)
C40 0.055(3) 0.063(3) 0.035(2) -0.015(2) 0.0091(19) 0.023(2)
O3 0.0205(10) 0.0246(11) 0.0129(10) 0.0067(8) -0.0004(8) -0.0048(8)
C41 0.0229(15) 0.0271(15) 0.0125(13) 0.0058(11) -0.0008(11) -0.0005(12)
C42 0.0239(17) 0.053(2) 0.0258(17) 0.0141(16) 0.0005(13) 0.0078(15)
O4 0.0175(10) 0.0159(10) 0.0229(11) 0.0035(8) 0.0056(8) -0.0022(8)
C43 0.0183(14) 0.0268(16) 0.0229(15) -0.0031(12) 0.0033(12) -0.0057(12)
C44 0.032(2) 0.0211(17) 0.085(3) 0.0059(19) 0.025(2) -0.0035(14)
O5 0.0275(11) 0.0197(10) 0.0094(9) -0.0018(7) -0.0021(8) 0.0015(8)
C45 0.0308(16) 0.0167(14) 0.0151(14) -0.0011(11) -0.0004(12) -0.0002(12)
C46 0.049(2) 0.0232(16) 0.0160(15) -0.0015(12) 0.0017(14) 0.0043(14)
O6 0.0257(11) 0.0213(10) 0.0115(9) 0.0038(8) -0.0029(8) -0.0060(8)
C47 0.0255(15) 0.0194(14) 0.0154(14) 0.0025(11) -0.0008(11) -0.0031(11)
C48 0.0374(18) 0.0242(16) 0.0175(15) 0.0054(12) 0.0028(13) -0.0069(13)
C49 0.025(2) 0.116(4) 0.047(3) 0.037(3) -0.0090(18) 0.002(2)
Cl1 0.0276(5) 0.1521(15) 0.0456(6) 0.0298(8) 0.0062(5) 0.0036(7)
Cl2 0.0283(5) 0.0781(8) 0.0425(6) 0.0089(5) -0.0052(4) -0.0041(5)
Cl3 0.0504(8) 0.0814(10) 0.1689(18) 0.0574(11) -0.0420(10) 0.0026(7)
C50 0.0332(19) 0.039(2) 0.036(2) -0.0021(16) 0.0056(15) 0.0028(15)
Cl4 0.0710(8) 0.1010(11) 0.0389(6) -0.0067(6) -0.0035(6) -0.0333(8)
Cl5 0.0358(5) 0.0599(7) 0.0465(6) -0.0001(5) 0.0064(4) -0.0135(4)
Cl6 0.0374(5) 0.0506(6) 0.0461(6) -0.0075(4) 0.0115(4) -0.0093(4)
 
_geom_special_details
;
 All esds (except the esd in the dihedral angle between two l.s. planes)
 are estimated using the full covariance matrix.  The cell esds are taken
 into account individually in the estimation of esds in distances, angles
 and torsion angles; correlations between esds in cell parameters are only
 used when they are defined by crystal symmetry.  An approximate (isotropic)
 treatment of cell esds is used for estimating esds involving l.s. planes.
;
 
loop_
 _geom_bond_atom_site_label_1
 _geom_bond_atom_site_label_2
 _geom_bond_distance
 _geom_bond_site_symmetry_2
 _geom_bond_publ_flag
C1 C13 1.404(4) . ?
C1 C2 1.407(4) . ?
C1 P1 1.854(3) . ?
C2 O1 1.348(3) . ?
C2 C3 1.451(4) . ?
C3 O2 1.366(3) . ?
C3 C4 1.380(4) . ?
C4 C14 1.400(4) . ?
C4 P2 1.844(3) . ?
C5 C6 1.407(4) . ?
C5 C15 1.408(4) . ?
C5 P2 1.855(3) . ?
C6 O3 1.357(3) . ?
C6 C7 1.445(4) . ?
C7 O4 1.362(3) . ?
C7 C8 1.387(4) . ?
C8 C16 1.387(4) . ?
C8 P3 1.831(3) . ?
C9 C10 1.401(4) . ?
C9 C17 1.405(4) . ?
C9 P3 1.849(3) . ?
C10 O5 1.346(3) . ?
C10 C11 1.458(4) . ?
C11 O6 1.357(3) . ?
C11 C12 1.394(4) . ?
C12 C18 1.403(4) . ?
C12 P1 1.848(3) . ?
C13 C14 1.385(4) . ?
C13 C18 1.432(4) . ?
C14 C15 1.424(4) . ?
C15 C16 1.377(4) . ?
C16 C17 1.431(4) . ?
C17 C18 1.377(4) . ?
P1 C19 1.804(3) . ?
P1 S1 1.9436(10) . ?
P2 C25 1.805(3) . ?
P2 S2 1.9471(11) . ?
P3 C31 1.808(3) . ?
P3 S3 1.9520(10) . ?
C19 C24 1.388(4) . ?
C19 C20 1.395(4) . ?
C20 C21 1.386(4) . ?
C21 C22 1.386(5) . ?
C22 C23 1.381(5) . ?
C23 C24 1.399(4) . ?
C25 C30 1.388(4) . ?
C25 C26 1.391(4) . ?
C26 C27 1.394(4) . ?
C27 C28 1.376(5) . ?
C28 C29 1.362(6) . ?
C29 C30 1.398(5) . ?
C31 C36 1.390(4) . ?
C31 C32 1.399(4) . ?
C32 C33 1.388(5) . ?
C33 C34 1.388(6) . ?
C34 C35 1.374(6) . ?
C35 C36 1.390(5) . ?
O1 C37 1.445(4) . ?
C37 C38 1.502(4) . ?
O2 C39 1.451(4) . ?
C39 C40 1.486(5) . ?
O3 C41 1.445(3) . ?
C41 C42 1.497(4) . ?
O4 C43 1.444(3) . ?
C43 C44 1.489(5) . ?
O5 C45 1.441(3) . ?
C45 C46 1.505(4) . ?
O6 C47 1.435(3) . ?
C47 C48 1.510(4) . ?
C49 Cl2 1.750(5) . ?
C49 Cl3 1.750(7) . ?
C49 Cl1 1.762(4) . ?
C50 Cl5 1.747(4) . ?
C50 Cl6 1.758(4) . ?
C50 Cl4 1.772(4) . ?
 
loop_
 _geom_angle_atom_site_label_1
 _geom_angle_atom_site_label_2
 _geom_angle_atom_site_label_3
 _geom_angle
 _geom_angle_site_symmetry_1
 _geom_angle_site_symmetry_3
 _geom_angle_publ_flag
C13 C1 C2 116.8(2) . . ?
C13 C1 P1 105.7(2) . . ?
C2 C1 P1 136.4(2) . . ?
O1 C2 C1 126.8(3) . . ?
O1 C2 C3 112.8(2) . . ?
C1 C2 C3 120.3(3) . . ?
O2 C3 C4 120.4(3) . . ?
O2 C3 C2 118.7(2) . . ?
C4 C3 C2 120.9(3) . . ?
C3 C4 C14 118.0(3) . . ?
C3 C4 P2 134.9(2) . . ?
C14 C4 P2 106.8(2) . . ?
C6 C5 C15 116.3(2) . . ?
C6 C5 P2 137.1(2) . . ?
C15 C5 P2 105.9(2) . . ?
O3 C6 C5 125.5(3) . . ?
O3 C6 C7 113.8(2) . . ?
C5 C6 C7 120.5(2) . . ?
O4 C7 C8 118.7(3) . . ?
O4 C7 C6 120.6(2) . . ?
C8 C7 C6 120.5(3) . . ?
C7 C8 C16 118.3(3) . . ?
C7 C8 P3 133.9(2) . . ?
C16 C8 P3 107.3(2) . . ?
C10 C9 C17 116.1(2) . . ?
C10 C9 P3 136.4(2) . . ?
C17 C9 P3 106.35(19) . . ?
O5 C10 C9 126.4(3) . . ?
O5 C10 C11 113.1(2) . . ?
C9 C10 C11 120.5(2) . . ?
O6 C11 C12 126.4(3) . . ?
O6 C11 C10 112.2(2) . . ?
C12 C11 C10 121.4(2) . . ?
C11 C12 C18 116.5(2) . . ?
C11 C12 P1 136.5(2) . . ?
C18 C12 P1 106.13(19) . . ?
C14 C13 C1 122.4(3) . . ?
C14 C13 C18 119.5(3) . . ?
C1 C13 C18 117.2(2) . . ?
C13 C14 C4 121.6(3) . . ?
C13 C14 C15 120.8(2) . . ?
C4 C14 C15 116.5(2) . . ?
C16 C15 C5 122.7(3) . . ?
C16 C15 C14 119.1(2) . . ?
C5 C15 C14 117.1(2) . . ?
C15 C16 C8 121.5(3) . . ?
C15 C16 C17 120.9(3) . . ?
C8 C16 C17 116.7(3) . . ?
C18 C17 C9 123.3(3) . . ?
C18 C17 C16 119.7(3) . . ?
C9 C17 C16 116.2(2) . . ?
C17 C18 C12 122.1(2) . . ?
C17 C18 C13 120.0(2) . . ?
C12 C18 C13 116.9(2) . . ?
C19 P1 C12 107.01(13) . . ?
C19 P1 C1 109.04(12) . . ?
C12 P1 C1 94.09(12) . . ?
C19 P1 S1 115.43(10) . . ?
C12 P1 S1 113.86(9) . . ?
C1 P1 S1 115.19(9) . . ?
C25 P2 C4 105.75(13) . . ?
C25 P2 C5 107.87(13) . . ?
C4 P2 C5 93.43(13) . . ?
C25 P2 S2 114.56(11) . . ?
C4 P2 S2 116.25(10) . . ?
C5 P2 S2 116.61(10) . . ?
C31 P3 C8 105.72(13) . . ?
C31 P3 C9 110.66(13) . . ?
C8 P3 C9 93.33(13) . . ?
C31 P3 S3 115.16(10) . . ?
C8 P3 S3 115.11(10) . . ?
C9 P3 S3 114.57(9) . . ?
C24 C19 C20 120.4(3) . . ?
C24 C19 P1 120.7(2) . . ?
C20 C19 P1 118.8(2) . . ?
C21 C20 C19 119.7(3) . . ?
C22 C21 C20 119.8(3) . . ?
C23 C22 C21 120.7(3) . . ?
C22 C23 C24 119.8(3) . . ?
C19 C24 C23 119.4(3) . . ?
C30 C25 C26 120.0(3) . . ?
C30 C25 P2 120.4(3) . . ?
C26 C25 P2 119.6(2) . . ?
C25 C26 C27 119.5(3) . . ?
C28 C27 C26 120.4(3) . . ?
C29 C28 C27 120.1(3) . . ?
C28 C29 C30 120.9(4) . . ?
C25 C30 C29 119.1(4) . . ?
C36 C31 C32 120.1(3) . . ?
C36 C31 P3 119.6(2) . . ?
C32 C31 P3 120.2(2) . . ?
C33 C32 C31 119.3(3) . . ?
C32 C33 C34 120.2(3) . . ?
C35 C34 C33 120.6(3) . . ?
C34 C35 C36 120.0(3) . . ?
C35 C36 C31 119.9(3) . . ?
C2 O1 C37 119.4(2) . . ?
O1 C37 C38 107.0(3) . . ?
C3 O2 C39 114.7(2) . . ?
O2 C39 C40 107.9(3) . . ?
C6 O3 C41 118.5(2) . . ?
O3 C41 C42 111.1(3) . . ?
C7 O4 C43 118.8(2) . . ?
O4 C43 C44 106.4(3) . . ?
C10 O5 C45 118.8(2) . . ?
O5 C45 C46 106.8(2) . . ?
C11 O6 C47 118.7(2) . . ?
O6 C47 C48 106.9(2) . . ?
Cl2 C49 Cl3 110.1(3) . . ?
Cl2 C49 Cl1 109.6(3) . . ?
Cl3 C49 Cl1 112.4(3) . . ?
Cl5 C50 Cl6 110.9(2) . . ?
Cl5 C50 Cl4 111.6(2) . . ?
Cl6 C50 Cl4 108.0(2) . . ?
 
_refine_diff_density_max    1.453
_refine_diff_density_min   -1.209
_refine_diff_density_rms    0.101

_shelx_res_file
;

    masa1002.res created by SHELXL-2014/7

TITL masa1002
REM  Yadorkari-X generated
CELL 0.71073 9.1387 20.6448 28.4015 90.0000 91.9110 90.0000
ZERR 4.0 0.0010 0.0024 0.0032 0.0000 0.0010 0.0000
LATT 1
SYMM -x+1/2, y+1/2, -z+1/2
REM  SPGR P21/n monoclinic
SFAC C H O P S Cl
UNIT 200 188 24 12 12 24
TEMP 23.0
L.S. 10
FMAP 2
PLAN -15
ACTA

WGHT    0.070600   13.311601
FVAR       0.05216   0.80866   0.82308
C1    1    0.360265    0.383772    0.904269    11.00000    0.01209    0.01812 =
         0.01350    0.00138   -0.00051   -0.00241
C2    1    0.329321    0.414618    0.946968    11.00000    0.01355    0.01930 =
         0.01611   -0.00061   -0.00034    0.00069
C3    1    0.306003    0.376662    0.989066    11.00000    0.01524    0.02243 =
         0.01297   -0.00263   -0.00025    0.00045
C4    1    0.318410    0.310068    0.988433    11.00000    0.01230    0.02289 =
         0.01218    0.00185   -0.00056    0.00031
C5    1    0.302172    0.179903    0.985792    11.00000    0.01209    0.02013 =
         0.01292    0.00182   -0.00081    0.00054
C6    1    0.270215    0.113424    0.981578    11.00000    0.01349    0.02135 =
         0.01329    0.00538   -0.00020   -0.00004
C7    1    0.272526    0.081758    0.936231    11.00000    0.01374    0.01687 =
         0.01900    0.00176   -0.00058    0.00008
C8    1    0.309029    0.116194    0.896350    11.00000    0.01464    0.01747 =
         0.01337    0.00097    0.00038   -0.00044
C9    1    0.350260    0.182178    0.816740    11.00000    0.01442    0.01601 =
         0.01540    0.00055    0.00038   -0.00193
C10   1    0.351453    0.218985    0.775326    11.00000    0.01466    0.01843 =
         0.01157   -0.00031   -0.00086   -0.00011
C11   1    0.363885    0.289315    0.777508    11.00000    0.01490    0.01889 =
         0.01106    0.00359   -0.00179   -0.00152
C12   1    0.375383    0.321823    0.820482    11.00000    0.01247    0.01489 =
         0.01409    0.00120    0.00028   -0.00181
C13   1    0.373359    0.316007    0.905402    11.00000    0.00923    0.01883 =
         0.01458    0.00015    0.00093   -0.00022
C14   1    0.354787    0.280371    0.946096    11.00000    0.01088    0.02123 =
         0.01102    0.00049   -0.00076   -0.00040
C15   1    0.343918    0.211584    0.944440    11.00000    0.01166    0.01936 =
         0.01136    0.00136   -0.00068   -0.00091
C16   1    0.348505    0.180763    0.901525    11.00000    0.01418    0.01977 =
         0.01335    0.00242   -0.00038   -0.00200
C17   1    0.368362    0.216770    0.859147    11.00000    0.01345    0.01866 =
         0.01204    0.00133    0.00033   -0.00111
C18   1    0.381332    0.283189    0.861123    11.00000    0.01166    0.01688 =
         0.01297    0.00074    0.00020   -0.00135
P1    4    0.356590    0.406236    0.841036    11.00000    0.01147    0.01476 =
         0.01262    0.00128    0.00009   -0.00003
P2    4    0.280007    0.244523    1.030350    11.00000    0.01405    0.02098 =
         0.01028    0.00140    0.00050    0.00000
P3    4    0.296959    0.098955    0.833085    11.00000    0.01555    0.01573 =
         0.01222    0.00026   -0.00016   -0.00238
S1    5    0.178228    0.448634    0.818072    11.00000    0.01378    0.02402 =
         0.02082    0.00183   -0.00180    0.00402
S2    5    0.091859    0.248508    1.060434    11.00000    0.01820    0.03163 =
         0.02072    0.00262    0.00667    0.00173
S3    5    0.103764    0.072343    0.808887    11.00000    0.01785    0.02429 =
         0.02111   -0.00078   -0.00248   -0.00573
C19   1    0.524604    0.447480    0.828169    11.00000    0.01514    0.01850 =
         0.01259   -0.00044    0.00076   -0.00282
C20   1    0.657381    0.416048    0.837838    11.00000    0.01617    0.02141 =
         0.02518   -0.00096   -0.00028   -0.00082
AFIX  43
H1    2    0.658916    0.376414    0.853410    11.00000   -1.20000
AFIX   0
C21   1    0.787011    0.444137    0.824139    11.00000    0.01579    0.03674 =
         0.02798   -0.00255    0.00068   -0.00412
AFIX  43
H2    2    0.875712    0.423151    0.830174    11.00000   -1.20000
AFIX   0
C22   1    0.784117    0.503561    0.801431    11.00000    0.02527    0.04299 =
         0.02207    0.00091    0.00274   -0.01710
AFIX  43
H3    2    0.871181    0.522064    0.792002    11.00000   -1.20000
AFIX   0
C23   1    0.653450    0.535600    0.792649    11.00000    0.03261    0.03012 =
         0.02609    0.00906   -0.00204   -0.01340
AFIX  43
H4    2    0.652895    0.575917    0.778037    11.00000   -1.20000
AFIX   0
C24   1    0.521903    0.507275    0.805781    11.00000    0.02364    0.02111 =
         0.02045    0.00572   -0.00221   -0.00203
AFIX  43
H5    2    0.433369    0.528315    0.799569    11.00000   -1.20000
AFIX   0
C25   1    0.436620    0.241545    1.070743    11.00000    0.02233    0.02015 =
         0.01480    0.00347   -0.00225   -0.00192
C26   1    0.574020    0.227342    1.053834    11.00000    0.02075    0.02521 =
         0.02238   -0.00363   -0.00437   -0.00009
AFIX  43
H6    2    0.584829    0.218186    1.022078    11.00000   -1.20000
AFIX   0
C27   1    0.695473    0.226942    1.084889    11.00000    0.02239    0.02150 =
         0.04438   -0.00216   -0.01046   -0.00094
AFIX  43
H7    2    0.787813    0.218001    1.073708    11.00000   -1.20000
AFIX   0
C28   1    0.679421    0.239701    1.131976    11.00000    0.03521    0.02694 =
         0.03341    0.00503   -0.02052   -0.00609
AFIX  43
H8    2    0.760663    0.238824    1.152577    11.00000   -1.20000
AFIX   0
C29   1    0.544767    0.253614    1.148479    11.00000    0.04684    0.07048 =
         0.01806    0.00184   -0.01195   -0.01008
AFIX  43
H9    2    0.534975    0.262285    1.180352    11.00000   -1.20000
AFIX   0
C30   1    0.421073    0.255044    1.118187    11.00000    0.03035    0.06181 =
         0.01463   -0.00163   -0.00192   -0.00368
AFIX  43
H10   2    0.329594    0.264908    1.129669    11.00000   -1.20000
AFIX   0
C31   1    0.443492    0.042560    0.822271    11.00000    0.02118    0.02085 =
         0.01120    0.00337    0.00211    0.00148
C32   1    0.588544    0.059238    0.833935    11.00000    0.02116    0.02665 =
         0.02436    0.00746    0.00157   -0.00181
AFIX  43
H11   2    0.611045    0.100192    0.845737    11.00000   -1.20000
AFIX   0
C33   1    0.698536    0.013983    0.827699    11.00000    0.02152    0.04869 =
         0.02524    0.01050    0.00571    0.00694
AFIX  43
H12   2    0.795478    0.024813    0.834931    11.00000   -1.20000
AFIX   0
C34   1    0.664249   -0.047396    0.810697    11.00000    0.03839    0.04633 =
         0.02213   -0.00060    0.00659    0.02121
AFIX  43
H13   2    0.738416   -0.077596    0.806862    11.00000   -1.20000
AFIX   0
C35   1    0.521648   -0.063911    0.799486    11.00000    0.05010    0.02970 =
         0.02776   -0.01016   -0.00301    0.01311
AFIX  43
H14   2    0.499496   -0.105264    0.788390    11.00000   -1.20000
AFIX   0
C36   1    0.410541   -0.018771    0.804740    11.00000    0.03130    0.02658 =
         0.02036   -0.00382   -0.00330    0.00557
AFIX  43
H15   2    0.314251   -0.029594    0.796534    11.00000   -1.20000
AFIX   0
O1    3    0.310699    0.478660    0.953840    11.00000    0.03006    0.01678 =
         0.01849   -0.00147    0.00546    0.00062
C37   1    0.380853    0.524206    0.923223    11.00000    0.02666    0.01961 =
         0.02277    0.00096    0.00224   -0.00225
AFIX  23
H16   2    0.337314    0.521865    0.891651    11.00000   -1.20000
H17   2    0.484459    0.514561    0.921658    11.00000   -1.20000
AFIX   0
C38   1    0.358988    0.590470    0.943687    11.00000    0.03427    0.02035 =
         0.03070   -0.00318   -0.00240   -0.00184
AFIX 137
H18   2    0.256415    0.600598    0.943043    11.00000   -1.50000
H19   2    0.409928    0.621885    0.925454    11.00000   -1.50000
H20   2    0.396649    0.591271    0.975643    11.00000   -1.50000
AFIX   0
O2    3    0.273726    0.408191    1.029707    11.00000    0.02325    0.02344 =
         0.01314   -0.00364    0.00137    0.00250
C39   1    0.124385    0.431772    1.031376    11.00000    0.02719    0.03278 =
         0.02300   -0.00109    0.00608    0.00982
AFIX  23
H21   2    0.057342    0.395786    1.034824    11.00000   -1.20000
H22   2    0.097841    0.454595    1.002484    11.00000   -1.20000
AFIX   0
C40   1    0.115874    0.476214    1.072332    11.00000    0.05470    0.06333 =
         0.03473   -0.01487    0.00911    0.02308
AFIX 137
H23   2    0.154074    0.454855    1.100138    11.00000   -1.50000
H24   2    0.015649    0.488060    1.076688    11.00000   -1.50000
H25   2    0.172400    0.514447    1.066636    11.00000   -1.50000
AFIX   0
O3    3    0.226210    0.074451    1.016896    11.00000    0.02051    0.02459 =
         0.01291    0.00669   -0.00040   -0.00483
C41   1    0.296084    0.081472    1.063020    11.00000    0.02291    0.02709 =
         0.01255    0.00581   -0.00076   -0.00052
AFIX  23
H26   2    0.241777    0.057067    1.085819    11.00000   -1.20000
H27   2    0.294911    0.126707    1.072234    11.00000   -1.20000
AFIX   0
C42   1    0.450968    0.057773    1.063206    11.00000    0.02388    0.05322 =
         0.02581    0.01414    0.00048    0.00782
AFIX 137
H28   2    0.452403    0.013342    1.053259    11.00000   -1.50000
H29   2    0.493568    0.061196    1.094463    11.00000   -1.50000
H30   2    0.506226    0.083589    1.042014    11.00000   -1.50000
AFIX   0
O4    3    0.248938    0.016812    0.932395    11.00000    0.01753    0.01589 =
         0.02289    0.00345    0.00564   -0.00221
C43   1    0.105163   -0.008328    0.941490    11.00000    0.01830    0.02681 =
         0.02291   -0.00310    0.00328   -0.00567
AFIX  23
H31   2    0.043924   -0.007802    0.912932    11.00000   -1.20000
H32   2    0.058517    0.017596    0.965203    11.00000   -1.20000
AFIX   0
C44   1    0.127067   -0.075988    0.958513    11.00000    0.03249    0.02114 =
         0.08520    0.00591    0.02539   -0.00345
AFIX 137
H33   2    0.184123   -0.099535    0.936479    11.00000   -1.50000
H34   2    0.033650   -0.096640    0.961333    11.00000   -1.50000
H35   2    0.177547   -0.075396    0.988699    11.00000   -1.50000
AFIX   0
O5    3    0.337877    0.196248    0.730973    11.00000    0.02752    0.01967 =
         0.00941   -0.00185   -0.00208    0.00146
C45   1    0.382220    0.130635    0.721645    11.00000    0.03079    0.01673 =
         0.01515   -0.00110   -0.00042   -0.00019
AFIX  23
H36   2    0.308098    0.100405    0.731592    11.00000   -1.20000
H37   2    0.473500    0.120817    0.738557    11.00000   -1.20000
AFIX   0
C46   1    0.401351    0.125556    0.669345    11.00000    0.04878    0.02316 =
         0.01603   -0.00153    0.00173    0.00433
AFIX 137
H38   2    0.310137    0.135095    0.653070    11.00000   -1.50000
H39   2    0.431688    0.082424    0.661646    11.00000   -1.50000
H40   2    0.474430    0.155908    0.659960    11.00000   -1.50000
AFIX   0
O6    3    0.357067    0.316818    0.734098    11.00000    0.02572    0.02129 =
         0.01149    0.00382   -0.00292   -0.00595
C47   1    0.433030    0.376715    0.727035    11.00000    0.02552    0.01938 =
         0.01545    0.00248   -0.00084   -0.00312
AFIX  23
H41   2    0.530014    0.375054    0.741940    11.00000   -1.20000
H42   2    0.379657    0.412429    0.740530    11.00000   -1.20000
AFIX   0
C48   1    0.443656    0.385625    0.674487    11.00000    0.03744    0.02423 =
         0.01753    0.00536    0.00281   -0.00690
AFIX 137
H43   2    0.501250    0.351259    0.661860    11.00000   -1.50000
H44   2    0.489211    0.426483    0.668204    11.00000   -1.50000
H45   2    0.347262    0.384798    0.659992    11.00000   -1.50000
PART 1
AFIX   0
C49   1    0.911341    0.272489    0.944701    11.00000    0.02483    0.11573 =
         0.04724    0.03698   -0.00900    0.00245
AFIX  13
H46   2    0.950715    0.277544    0.977011    11.00000   -1.20000
AFIX   0
CL1   6    0.721150    0.286591    0.944778    11.00000    0.02760    0.15210 =
         0.04560    0.02982    0.00621    0.00357
CL2   6    0.994417    0.330277    0.909306    11.00000    0.02829    0.07806 =
         0.04252    0.00894   -0.00524   -0.00412
CL3   6    0.953868    0.194408    0.925422    11.00000    0.05042    0.08137 =
         0.16890    0.05738   -0.04199    0.00257
PART 0
C50   1    0.849840    0.222562    0.782844    11.00000    0.03324    0.03930 =
         0.03561   -0.00207    0.00560    0.00279
AFIX  13
H47   2    0.899665    0.180966    0.787809    11.00000   -1.20000
AFIX   0
CL4   6    0.746401    0.219166    0.729025    11.00000    0.07104    0.10104 =
         0.03894   -0.00668   -0.00353   -0.03328
CL5   6    0.981211    0.284014    0.782298    11.00000    0.03578    0.05987 =
         0.04652   -0.00006    0.00638   -0.01353
CL6   6    0.727602    0.234622    0.828541    11.00000    0.03742    0.05059 =
         0.04611   -0.00748    0.01147   -0.00931

HKLF 4 1 1 0 0 0 1 0 0 0 1

REM  masa1002
REM R1 =  0.0574 for   10082 Fo > 4sig(Fo)  and  0.0748 for all   12708 data
REM    621 parameters refined using      0 restraints

END

WGHT      0.0711     13.1994

REM Highest difference peak  1.453,  deepest hole -1.209,  1-sigma level  0.101
Q1    1   0.7139  0.2389  0.9257  11.00000  0.05    1.45
Q2    1   0.9549  0.1627  0.9019  11.00000  0.05    1.16
Q3    1   0.9201  0.1837  0.7611  11.00000  0.05    1.03
Q4    1   0.9440  0.3004  0.9231  11.00000  0.05    0.78
Q5    1   0.8773  0.2030  0.9459  11.00000  0.05    0.66
Q6    1   0.3591  0.0769  0.8324  11.00000  0.05    0.60
Q7    1   0.8479  0.1974  0.7274  11.00000  0.05    0.55
Q8    1   0.7841  0.2774  0.7546  11.00000  0.05    0.54
Q9    1   0.3533  0.2416  0.9439  11.00000  0.05    0.52
Q10   1   0.3347  0.1972  0.9214  11.00000  0.05    0.52
Q11   1   0.3584  0.2009  0.8808  11.00000  0.05    0.51
Q12   1   0.2965  0.1009  0.8626  11.00000  0.05    0.50
Q13   1   0.1359  0.0443  0.8095  11.00000  0.05    0.50
Q14   1   0.2773  0.4069  0.8363  11.00000  0.05    0.50
Q15   1   0.2854  0.1490  0.9824  11.00000  0.05    0.50
;
_shelx_res_checksum   48973

_shelx_hkl_file
;
  -1   0   0   -0.29    0.05
  -1   0   0   -0.34    0.03
  -1   0   0   -0.34    0.03
  -1   0   0   -0.40    0.05
  -2   0   0  224.10    5.70
  -2   0   0  229.57    5.55
  -2   0   0  222.44    5.93
  -2   0   0  227.41    5.28
  -3   0   0    0.12    0.07
  -3   0   0   -0.27    0.10
  -3   0   0   -0.13    0.07
  -3   0   0    0.11    0.12
  -4   0   0    6.50    0.24
  -4   0   0    6.70    0.31
  -4   0   0    6.42    0.33
  -4   0   0    6.43    0.24
  -5   0   0    0.05    0.14
  -5   0   0    0.23    0.16
  -5   0   0    0.02    0.10
  -6   0   0    3.73    0.32
  -6   0   0    3.45    0.28
   6   0   0    2.90    0.19
  -6   0   0    2.94    0.20
  -7   0   0    0.81    0.22
  -7   0   0    0.87    0.20
  -8   0   0    4.14    0.35
   8   0   0    3.75    0.24
  -8   0   0    3.98    0.35
  -9   0   0    0.09    0.23
   9   0   0    0.02    0.12
 -10   0   0    2.12    0.30
  10   0   0    2.14    0.27
  11   0   0    0.35    0.23
  12   0   0    1.02    0.27
   0  -1   0   -0.18    0.01
  -1  -1   0    1.32    0.06
   1  -1   0    1.42    0.08
  -1  -1   0    1.50    0.10
   1  -1   0    1.25    0.07
  -1  -1   0    1.37    0.08
  -1   1   0    1.43    0.11
   1   1   0    1.39    0.08
  -1   1   0    1.45    0.10
  -2  -1   0  391.21    9.46
  -2  -1   0  380.20    8.89
  -2  -1   0  378.85   10.13
  -2  -1   0  384.60    9.72
  -2   1   0  387.24   10.14
  -2   1   0  380.24    9.44
  -2   1   0  380.71    9.67
  -3  -1   0    2.02    0.14
  -3  -1   0    1.90    0.15
  -3  -1   0    1.79    0.13
  -3  -1   0    1.95    0.16
  -3   1   0    1.53    0.13
  -3   1   0    1.92    0.15
  -3   1   0    1.88    0.16
  -4  -1   0   13.51    0.38
  -4  -1   0   13.62    0.41
   4  -1   0   13.09    0.38
  -4  -1   0   13.47    0.49
  -4  -1   0   14.10    0.46
  -4   1   0   13.99    0.40
  -4   1   0   13.49    0.49
  -4   1   0   14.38    0.45
  -5  -1   0   33.77    0.88
  -5  -1   0   31.48    0.90
  -5  -1   0   32.73    0.81
  -5  -1   0   32.47    0.97
   5  -1   0   31.43    0.81
  -5   1   0   30.86    0.89
  -5   1   0   32.29    0.87
  -5   1   0   31.42    0.97
  -6  -1   0    0.10    0.16
  -6  -1   0    0.11    0.11
   6  -1   0   -0.03    0.09
  -6  -1   0   -0.07    0.16
   6   1   0    0.01    0.09
  -6   1   0    0.00    0.10
  -6   1   0   -0.03    0.15
  -6   1   0    0.17    0.18
   7  -1   0   11.91    0.39
  -7  -1   0   12.07    0.48
  -7  -1   0   12.21    0.53
  -7  -1   0   12.07    0.41
   7   1   0   12.29    0.38
  -7   1   0   11.41    0.40
  -7   1   0   11.82    0.48
  -7   1   0   12.15    0.54
  -8  -1   0   30.60    0.87
   8  -1   0   28.83    0.80
  -8  -1   0   29.56    0.92
  -8   1   0   30.96    0.92
   8   1   0   30.02    0.80
  -8   1   0   31.40    1.03
  -9  -1   0    0.19    0.22
   9  -1   0    0.03    0.13
   9   1   0    0.10    0.18
  -9   1   0    0.20    0.23
  -9   1   0   -0.10    0.25
 -10  -1   0    4.73    0.38
  10   1   0    4.31    0.36
 -10   1   0    4.65    0.37
  11  -1   0    3.05    0.32
 -11  -1   0    3.11    0.35
  11   1   0    4.20    0.39
  12  -1   0    2.24    0.31
  12   1   0    1.84    0.30
   0  -2   0  122.66    2.89
   0  -2   0  120.97    3.17
   0   2   0  129.20    3.29
   0   2   0  125.32    3.06
  -1  -2   0    4.69    0.13
   1  -2   0    4.89    0.15
  -1  -2   0    4.54    0.16
  -1  -2   0    4.95    0.18
   1   2   0    4.91    0.15
  -1   2   0    4.86    0.18
  -1   2   0    4.76    0.16
   2  -2   0    0.75    0.07
  -2  -2   0    0.76    0.09
  -2  -2   0    0.72    0.07
   2  -2   0    0.82    0.08
  -2  -2   0    0.70    0.11
   2   2   0    0.88    0.08
  -2   2   0    0.66    0.12
  -2   2   0    0.83    0.10
  -3  -2   0   23.91    0.58
   3  -2   0   23.33    0.60
  -3  -2   0   23.97    0.66
  -3  -2   0   23.98    0.65
  -3   2   0   23.92    0.65
  -3   2   0   23.30    0.71
  -4  -2   0    4.63    0.28
   4  -2   0    5.13    0.21
  -4  -2   0    5.19    0.20
  -4  -2   0    5.01    0.29
  -4  -2   0    5.19    0.23
  -4   2   0    5.12    0.31
  -4   2   0    5.12    0.27
  -4   2   0    5.07    0.19
  -5  -2   0   14.95    0.49
  -5  -2   0   14.67    0.45
  -5  -2   0   14.89    0.40
   5  -2   0   13.71    0.41
  -5   2   0   14.19    0.53
  -5   2   0   14.36    0.48
  -5   2   0   13.88    0.42
  -6  -2   0    2.16    0.18
  -6  -2   0    1.83    0.21
   6  -2   0    2.10    0.15
  -6   2   0    2.05    0.24
  -6   2   0    2.02    0.21
  -7  -2   0    0.20    0.14
   7  -2   0   -0.01    0.11
  -7  -2   0    0.32    0.19
  -7   2   0    0.03    0.18
   7   2   0    0.16    0.10
  -7   2   0   -0.02    0.20
  -8  -2   0    3.00    0.29
   8  -2   0    3.95    0.24
  -8  -2   0    3.51    0.26
   8   2   0    3.23    0.29
  -8   2   0    3.35    0.34
  -8   2   0    4.01    0.31
   8   2   0    3.67    0.24
  -9  -2   0    2.02    0.28
   9  -2   0    2.08    0.19
   9   2   0    2.71    0.25
  -9   2   0    2.32    0.29
  -9   2   0    2.36    0.33
 -10  -2   0    0.57    0.25
  10   2   0    0.58    0.21
 -10   2   0    0.36    0.30
 -11  -2   0    5.38    0.42
  11   2   0    4.12    0.39
  12  -2   0    0.48    0.25
   0  -3   0   -0.60    0.05
   0  -3   0   -0.65    0.03
   0   3   0   -0.61    0.03
   0   3   0   -0.71    0.04
  -1  -3   0    0.13    0.03
  -1  -3   0    0.00    0.07
   1  -3   0    0.17    0.07
   1  -3   0    0.02    0.06
  -1   3   0    0.06    0.09
   1   3   0    0.34    0.05
  -1   3   0    0.09    0.07
  -2  -3   0    2.15    0.18
  -2  -3   0    2.18    0.14
   2  -3   0    2.15    0.13
   2  -3   0    1.89    0.11
  -2  -3   0    2.45    0.11
   2   3   0    2.33    0.13
  -2   3   0    1.85    0.16
  -2   3   0    1.87    0.14
   3  -3   0   13.22    0.37
  -3  -3   0   13.48    0.40
  -3  -3   0   13.44    0.42
   3  -3   0   12.54    0.37
  -3  -3   0   13.86    0.35
   3   3   0   12.61    0.40
  -3   3   0   13.23    0.46
  -3   3   0   12.95    0.40
   4  -3   0   17.13    0.50
  -4  -3   0   18.26    0.46
   4  -3   0   17.64    0.48
  -4  -3   0   18.25    0.53
  -4  -3   0   17.52    0.55
   4   3   0   17.20    0.54
  -4   3   0   17.61    0.59
  -4   3   0   18.50    0.54
  -5  -3   0    8.65    0.32
   5  -3   0    7.90    0.28
   5  -3   0    7.64    0.28
  -5  -3   0    7.85    0.36
  -5  -3   0    8.69    0.27
  -5   3   0    8.54    0.35
   5   3   0    8.22    0.32
  -5   3   0    8.69    0.39
   6  -3   0   32.89    0.85
   6  -3   0   31.46    0.90
  -6  -3   0   34.47    0.84
  -6  -3   0   33.75    0.95
  -6  -3   0   33.35    0.93
   6   3   0   31.29    0.96
  -6   3   0   33.72    1.04
  -6   3   0   33.47    0.93
   7  -3   0    5.14    0.25
  -7  -3   0    4.85    0.27
  -7  -3   0    4.78    0.34
   7   3   0    4.51    0.29
  -7   3   0    4.12    0.34
  -7   3   0    5.05    0.37
   7   3   0    4.54    0.24
  -8  -3   0   10.77    0.49
   8  -3   0   11.07    0.39
  -8  -3   0   11.05    0.43
  -8   3   0   12.10    0.50
  -8   3   0   10.97    0.55
   8   3   0   10.75    0.46
   9  -3   0    3.18    0.24
  -9  -3   0    3.73    0.32
  -9   3   0    2.98    0.36
   9   3   0    3.86    0.30
  -9   3   0    3.67    0.32
  10  -3   0    0.15    0.15
 -10  -3   0    0.17    0.24
 -10   3   0    0.04    0.28
  10   3   0    0.21    0.20
 -11  -3   0    2.18    0.32
  11   3   0    2.43    0.30
 -11   3   0    2.63    0.40
   0  -4   0  359.38    9.07
   0  -4   0  351.41    8.28
   0   4   0  360.79    9.41
   0   4   0  361.67    8.75
  -1  -4   0    8.09    0.26
  -1  -4   0    8.68    0.21
   1  -4   0    8.26    0.24
   1  -4   0    8.21    0.25
   1   4   0    8.77    0.24
  -1   4   0    8.24    0.29
   1   4   0    8.34    0.25
  -1   4   0    8.60    0.25
   2  -4   0    5.01    0.18
  -2  -4   0    4.83    0.22
   2  -4   0    4.99    0.18
  -2  -4   0    5.16    0.15
  -2  -4   0    4.87    0.19
  -2   4   0    5.20    0.20
   2   4   0    5.07    0.18
  -2   4   0    4.49    0.23
   3  -4   0   -0.09    0.07
   3  -4   0   -0.15    0.07
  -3  -4   0    0.07    0.11
  -3  -4   0   -0.13    0.06
  -3  -4   0   -0.10    0.09
  -3   4   0    0.01    0.12
   3   4   0    0.13    0.07
  -3   4   0    0.08    0.10
  -4  -4   0    8.29    0.25
  -4  -4   0    8.28    0.35
  -4  -4   0    8.23    0.30
   4  -4   0    8.53    0.29
   4  -4   0    7.90    0.27
   4   4   0    7.74    0.29
  -4   4   0    8.26    0.37
  -4   4   0    8.07    0.32
   5  -4   0   30.20    0.82
  -5  -4   0   30.28    0.87
  -5  -4   0   31.68    0.76
   5  -4   0   30.62    0.79
  -5  -4   0   31.67    0.86
   5   4   0   30.72    0.88
  -5   4   0   30.23    0.85
  -5   4   0   29.87    0.94
  -6  -4   0   16.48    0.52
   6  -4   0   16.15    0.49
  -6  -4   0   16.29    0.56
   6  -4   0   16.75    0.49
  -6  -4   0   16.89    0.46
  -6   4   0   16.54    0.55
  -6   4   0   16.36    0.62
   6   4   0   16.66    0.54
  -7  -4   0    8.68    0.36
  -7  -4   0    8.25    0.41
   7  -4   0    8.72    0.33
  -7   4   0    9.09    0.41
  -7   4   0    8.39    0.46
   7   4   0    8.42    0.37
   8  -4   0    0.34    0.14
  -8  -4   0    0.26    0.21
  -8  -4   0    0.18    0.16
   8   4   0   -0.02    0.15
  -8   4   0    0.20    0.22
  -8   4   0    0.30    0.24
  -9  -4   0    0.16    0.22
   9  -4   0    0.03    0.14
  -9   4   0   -0.16    0.22
   9   4   0    0.02    0.17
  -9   4   0    0.11    0.26
 -10  -4   0    0.44    0.24
  10  -4   0    0.36    0.16
 -10   4   0    0.21    0.29
  10   4   0    0.35    0.20
 -11  -4   0    2.08    0.32
 -11   4   0    2.04    0.39
 -12  -4   0    0.59    0.29
   0  -5   0    0.07    0.05
   0  -5   0   -0.07    0.07
   0   5   0   -0.02    0.05
   0   5   0   -0.03    0.06
   1  -5   0   16.06    0.44
  -1  -5   0   15.79    0.46
  -1  -5   0   16.64    0.39
   1  -5   0   15.76    0.41
   1   5   0   16.15    0.43
  -1   5   0   16.64    0.43
  -1   5   0   16.11    0.48
   1   5   0   16.93    0.44
   2  -5   0   84.88    2.00
   2  -5   0   85.44    2.16
  -2  -5   0   84.78    2.18
  -2  -5   0   83.64    1.97
  -2   5   0   87.85    2.10
  -2   5   0   86.38    2.28
   2   5   0   83.48    2.24
  -3  -5   0    3.59    0.23
   3  -5   0    3.21    0.17
   3  -5   0    3.11    0.15
  -3  -5   0    3.40    0.14
  -3  -5   0    3.21    0.19
   3   5   0    3.48    0.16
  -3   5   0    3.46    0.21
  -3   5   0    3.14    0.23
   4  -5   0    0.00    0.08
  -4  -5   0   -0.04    0.13
   4  -5   0    0.06    0.09
  -4  -5   0    0.08    0.10
  -4  -5   0    0.08    0.07
  -4   5   0   -0.18    0.12
   4   5   0    0.06    0.08
  -4   5   0    0.15    0.14
   5  -5   0    0.19    0.09
   5  -5   0   -0.01    0.09
  -5  -5   0    0.00    0.07
  -5  -5   0   -0.05    0.11
  -5  -5   0   -0.15    0.13
   5   5   0    0.03    0.09
  -5   5   0    0.07    0.16
  -5   5   0    0.11    0.14
   6  -5   0    0.32    0.12
  -6  -5   0    0.42    0.09
  -6  -5   0    0.17    0.16
   6  -5   0    0.36    0.12
  -6  -5   0    0.47    0.14
  -6   5   0    0.48    0.17
  -6   5   0    0.42    0.19
   6   5   0    0.48    0.12
  -7  -5   0   10.58    0.40
  -7  -5   0   11.36    0.46
   7  -5   0   10.65    0.37
  -7   5   0   10.71    0.45
   7   5   0   10.73    0.42
  -7   5   0    9.55    0.50
   8  -5   0    5.12    0.28
  -8  -5   0    6.08    0.32
  -8  -5   0    5.41    0.37
   8   5   0    6.10    0.33
  -8   5   0    6.08    0.39
  -8   5   0    5.25    0.43
  -9  -5   0    0.86    0.20
   9  -5   0    0.95    0.17
  -9  -5   0    1.57    0.26
   9   5   0    1.11    0.20
  -9   5   0    1.12    0.30
 -10  -5   0    0.82    0.26
  10  -5   0    0.39    0.16
 -10   5   0    0.84    0.32
  10   5   0    0.67    0.21
 -11  -5   0   -0.07    0.25
  11  -5   0   -0.06    0.17
 -11   5   0    0.17    0.33
   0  -6   0  416.97   10.61
   0  -6   0  416.28    9.70
   0   6   0  420.83   11.00
   0   6   0  420.76   10.22
  -1  -6   0   23.41    0.66
  -1  -6   0   25.26    0.58
   1  -6   0   23.70    0.60
   1  -6   0   25.14    0.65
  -1   6   0   24.96    0.62
   1   6   0   24.37    0.63
  -1   6   0   24.21    0.69
   1   6   0   24.67    0.66
   2  -6   0   73.19    1.70
  -2  -6   0   72.44    1.86
   2  -6   0   72.52    1.83
  -2  -6   0   70.48    1.67
  -2   6   0   69.82    1.94
   2   6   0   72.17    1.79
   2   6   0   73.00    1.90
  -2   6   0   72.66    1.78
   3  -6   0    1.39    0.12
  -3  -6   0    1.64    0.16
   3  -6   0    1.91    0.13
  -3  -6   0    1.79    0.14
  -3  -6   0    1.77    0.11
   3   6   0    1.81    0.13
  -3   6   0    1.58    0.17
  -3   6   0    1.60    0.14
  -4  -6   0    0.46    0.14
   4  -6   0    0.30    0.10
  -4  -6   0    0.29    0.10
   4  -6   0    0.27    0.09
  -4  -6   0    0.37    0.07
  -4   6   0    0.37    0.15
   4   6   0    0.38    0.08
  -4   6   0    0.38    0.13
   5  -6   0    4.47    0.22
  -5  -6   0    5.01    0.19
   5  -6   0    4.36    0.20
  -5  -6   0    4.65    0.24
  -5  -6   0    5.01    0.29
  -5   6   0    4.90    0.28
   5   6   0    5.01    0.23
  -5   6   0    5.02    0.31
  -6  -6   0   19.75    0.51
  -6  -6   0   19.71    0.60
  -6  -6   0   18.82    0.62
   6  -6   0   18.32    0.54
  -6   6   0   18.31    0.69
  -6   6   0   18.57    0.61
   6   6   0   19.54    0.60
  -7  -6   0    0.31    0.15
  -7  -6   0   -0.05    0.18
   7  -6   0    0.23    0.13
  -7   6   0    0.09    0.19
   7   6   0    0.31    0.14
  -7   6   0    0.14    0.22
  -8  -6   0    0.26    0.17
  -8  -6   0    0.47    0.22
   8  -6   0    0.36    0.15
  -8   6   0    0.76    0.23
   8   6   0    0.49    0.16
  -8   6   0    0.44    0.25
   9  -6   0    4.28    0.27
  -9  -6   0    4.40    0.29
  -9  -6   0    4.25    0.34
   9   6   0    4.02    0.30
  -9   6   0    4.12    0.40
 -10  -6   0    0.73    0.26
  10  -6   0    0.73    0.19
 -10   6   0    0.60    0.31
  11  -6   0    0.20    0.18
 -11  -6   0    0.23    0.27
 -11   6   0    0.14    0.33
   1  -7   0    1.30    0.09
  -1  -7   0    1.40    0.12
  -1  -7   0    1.20    0.08
   1  -7   0    1.42    0.11
   1   7   0    1.26    0.10
   1   7   0    1.22    0.09
  -1   7   0    1.41    0.12
  -1   7   0    1.62    0.11
  -2  -7   0    1.24    0.08
   2  -7   0    0.97    0.10
   2  -7   0    1.16    0.10
  -2  -7   0    1.18    0.12
  -2   7   0    0.96    0.13
  -2   7   0    1.27    0.11
   2   7   0    0.99    0.10
   2   7   0    1.12    0.08
  -3  -7   0    5.82    0.18
   3  -7   0    5.70    0.21
  -3  -7   0    5.67    0.25
   3  -7   0    5.39    0.23
  -3   7   0    5.69    0.25
   3   7   0    5.88    0.21
   3   7   0    5.32    0.23
  -3   7   0    5.79    0.30
  -4  -7   0   10.41    0.38
   4  -7   0    9.81    0.33
  -4  -7   0   10.29    0.36
   4  -7   0   10.16    0.32
  -4  -7   0   10.46    0.28
  -4   7   0   10.21    0.36
  -4   7   0    9.18    0.41
   4   7   0   10.22    0.33
  -5  -7   0   14.17    0.48
   5  -7   0   13.99    0.43
  -5  -7   0   15.21    0.51
   5  -7   0   14.57    0.44
  -5  -7   0   15.28    0.39
  -5   7   0   14.48    0.48
  -5   7   0   14.68    0.56
   5   7   0   14.71    0.46
  -6  -7   0    2.30    0.23
  -6  -7   0    2.51    0.22
   6  -7   0    2.56    0.21
   6   7   0    2.39    0.20
  -6   7   0    2.16    0.26
  -6   7   0    2.05    0.22
  -7  -7   0    1.60    0.20
   7  -7   0    1.77    0.18
  -7  -7   0    1.87    0.24
  -7   7   0    1.98    0.28
  -7   7   0    1.88    0.24
   7   7   0    2.03    0.18
  -8  -7   0    3.67    0.31
  -8  -7   0    3.50    0.29
   8  -7   0    3.45    0.25
   8   7   0    3.85    0.26
  -8   7   0    3.52    0.36
  -9  -7   0    2.34    0.25
   9  -7   0    2.54    0.22
  -9  -7   0    2.58    0.30
   9   7   0    2.73    0.24
  -9   7   0    2.45    0.36
 -10  -7   0    0.35    0.25
  10  -7   0    0.33    0.17
 -10   7   0    0.47    0.31
  11  -7   0    1.11    0.21
 -11   7   0    1.36    0.38
   0  -8   0    6.02    0.23
   0  -8   0    6.08    0.19
   0   8   0    6.34    0.21
   0   8   0    6.01    0.23
   1  -8   0    1.98    0.13
  -1  -8   0    1.90    0.16
  -1  -8   0    2.11    0.10
   1  -8   0    1.96    0.13
   1   8   0    2.07    0.12
   1   8   0    1.93    0.13
  -1   8   0    2.07    0.17
  -1   8   0    2.18    0.13
  -2  -8   0    6.51    0.27
  -2  -8   0    6.77    0.19
   2  -8   0    6.45    0.23
   2  -8   0    6.34    0.23
   2   8   0    6.86    0.24
  -2   8   0    6.84    0.24
   2   8   0    6.71    0.22
  -2   8   0    6.59    0.29
   3  -8   0    1.13    0.11
   3  -8   0    1.61    0.14
  -3  -8   0    1.37    0.14
  -3  -8   0    1.25    0.10
   3   8   0    1.49    0.12
   3   8   0    1.21    0.12
  -3   8   0    1.17    0.16
  -3   8   0    1.34    0.13
  -4  -8   0   14.19    0.45
   4  -8   0   13.33    0.41
   4  -8   0   13.32    0.40
  -4  -8   0   14.32    0.36
   4   8   0   14.13    0.42
  -4   8   0   13.20    0.51
  -4   8   0   13.68    0.44
  -5  -8   0    0.20    0.13
   5  -8   0    0.36    0.10
  -5  -8   0    0.60    0.16
   5  -8   0    0.16    0.11
  -5   8   0    0.32    0.15
  -5   8   0    0.22    0.17
   5   8   0    0.47    0.10
  -6  -8   0   35.84    1.02
  -6  -8   0   35.09    1.01
   6  -8   0   35.02    0.92
   6   8   0   35.95    1.01
  -6   8   0   36.54    0.99
  -6   8   0   34.33    1.11
  -7  -8   0    2.76    0.27
   7  -8   0    2.45    0.20
  -7  -8   0    2.60    0.23
   7   8   0    2.53    0.22
  -7   8   0    2.46    0.31
  -7   8   0    2.79    0.26
  -8  -8   0    1.94    0.26
   8  -8   0    1.82    0.19
  -8  -8   0    2.10    0.23
   8   8   0    2.01    0.19
  -8   8   0    1.88    0.31
  -9  -8   0   10.33    0.44
  -9  -8   0    9.41    0.48
   9  -8   0    9.74    0.40
  -9   8   0    8.95    0.55
  10  -8   0    2.51    0.24
 -10   8   0    2.36    0.38
  11  -8   0    4.15    0.31
  11   8   0    4.07    0.34
 -11   8   0    3.66    0.47
   0  -9   0    0.04    0.09
   0  -9   0    0.12    0.06
   0   9   0    0.10    0.07
   0   9   0   -0.02    0.08
   1  -9   0    4.86    0.21
   1  -9   0    5.18    0.20
  -1  -9   0    5.50    0.16
  -1  -9   0    5.42    0.23
   1   9   0    5.60    0.20
  -1   9   0    5.70    0.20
   1   9   0    5.46    0.19
  -1   9   0    4.62    0.23
   2  -9   0   61.90    1.47
  -2  -9   0   60.72    1.43
   2  -9   0   61.14    1.58
  -2  -9   0   61.36    1.61
   2   9   0   60.75    1.54
  -2   9   0   59.74    1.68
  -2   9   0   63.10    1.53
   2   9   0   61.78    1.63
  -3  -9   0    0.04    0.05
   3  -9   0   -0.04    0.08
  -3  -9   0    0.10    0.11
   3  -9   0    0.11    0.08
  -3   9   0    0.07    0.13
   3   9   0    0.18    0.06
  -3   9   0   -0.03    0.10
   3   9   0    0.13    0.09
  -4  -9   0    7.05    0.29
   4  -9   0    7.45    0.25
   4  -9   0    7.40    0.27
  -4  -9   0    7.51    0.22
   4   9   0    7.25    0.29
  -4   9   0    6.97    0.35
   4   9   0    7.29    0.26
  -4   9   0    7.47    0.30
   5  -9   0    0.09    0.11
  -5  -9   0    0.05    0.13
  -5   9   0    0.04    0.15
   5   9   0    0.12    0.09
  -5   9   0    0.23    0.18
   5   9   0    0.09    0.12
  -6  -9   0   -0.03    0.14
   6  -9   0    0.25    0.13
  -6   9   0    0.14    0.20
  -6   9   0    0.08    0.17
   6   9   0    0.22    0.11
   7  -9   0    7.57    0.33
  -7  -9   0    7.04    0.35
  -7   9   0    7.62    0.46
   7   9   0    7.92    0.32
  -8  -9   0    4.84    0.31
   8  -9   0    4.85    0.28
   8   9   0    4.98    0.28
  -8   9   0    4.81    0.43
   9  -9   0    5.78    0.31
  -9  -9   0    6.03    0.35
  -9   9   0    5.71    0.47
 -10  -9   0    0.61    0.22
  10  -9   0    0.26    0.17
  10   9   0    0.64    0.21
 -10   9   0    0.31    0.32
  11  -9   0    0.17    0.18
  11   9   0    0.03    0.21
 -11   9   0    0.27    0.35
   0 -10   0   42.79    1.13
   0 -10   0   42.57    1.02
   0  10   0   42.85    1.16
   0  10   0   42.10    1.08
  -1 -10   0   17.41    0.52
  -1 -10   0   17.69    0.44
   1 -10   0   18.23    0.46
   1 -10   0   17.67    0.51
  -1  10   0   16.90    0.54
   1  10   0   17.43    0.48
   1  10   0   17.02    0.50
  -1  10   0   17.59    0.48
   2 -10   0   18.58    0.53
  -2 -10   0   18.36    0.56
  -2 -10   0   18.75    0.46
   2 -10   0   18.48    0.50
  -2  10   0   19.36    0.52
  -2  10   0   19.02    0.60
   2  10   0   19.19    0.53
   2  10   0   18.40    0.52
   3 -10   0    4.19    0.19
  -3 -10   0    4.11    0.14
  -3 -10   0    4.29    0.23
   3 -10   0    4.03    0.20
   3  10   0    4.12    0.21
  -3  10   0    3.65    0.26
  -3  10   0    3.91    0.22
   3  10   0    4.41    0.17
  -4 -10   0    1.94    0.18
   4 -10   0    1.89    0.15
   4 -10   0    1.90    0.14
   4  10   0    1.98    0.14
   4  10   0    2.07    0.16
  -4  10   0    1.68    0.21
  -4  10   0    2.09    0.17
   5 -10   0    0.63    0.13
  -5 -10   0    0.81    0.16
  -5  10   0    0.68    0.20
  -5  10   0    0.62    0.16
   5  10   0    0.70    0.14
   5  10   0    0.72    0.10
  -6 -10   0    9.24    0.40
   6 -10   0    9.18    0.35
  -6  10   0    9.02    0.48
  -6  10   0   10.18    0.42
   6  10   0   10.17    0.35
   6  10   0   10.02    0.39
  -7 -10   0    0.08    0.17
   7 -10   0    0.04    0.13
   7  10   0    0.09    0.12
   7  10   0    0.23    0.16
  -7  10   0    0.21    0.23
  -8 -10   0    3.56    0.31
   8 -10   0    3.27    0.25
   8  10   0    3.09    0.26
  -8  10   0    3.69    0.38
  -9 -10   0    2.12    0.27
   9 -10   0    2.18    0.22
   9  10   0    2.13    0.24
  -9  10   0    1.72    0.35
 -10 -10   0    3.71    0.33
  10 -10   0    4.08    0.29
 -10  10   0    3.98    0.46
  10  10   0    3.71    0.31
  11 -10   0    0.42    0.20
   0 -11   0    0.31    0.07
   0  11   0    0.29    0.10
   1 -11   0   45.20    1.19
  -1 -11   0   43.90    1.20
   1 -11   0   45.05    1.08
  -1 -11   0   44.71    1.06
   1  11   0   45.17    1.14
   1  11   0   44.83    1.21
  -1  11   0   43.40    1.24
  -1  11   0   45.26    1.13
   2 -11   0   87.84    2.06
   2 -11   0   89.00    2.23
  -2 -11   0   86.31    2.02
  -2 -11   0   83.43    2.26
  -2  11   0   86.20    2.36
   2  11   0   85.44    2.17
  -2  11   0   88.81    2.16
   2  11   0   87.91    2.30
  -3 -11   0   13.20    0.46
   3 -11   0   13.43    0.41
   3 -11   0   13.44    0.40
  -3 -11   0   13.40    0.35
   3  11   0   14.09    0.40
  -3  11   0   14.43    0.50
  -3  11   0   13.80    0.42
   3  11   0   13.71    0.42
   4 -11   0    0.84    0.12
  -4 -11   0    0.71    0.15
   4 -11   0    0.68    0.12
  -4  11   0    0.96    0.19
  -4  11   0    0.99    0.15
   4  11   0    0.59    0.12
   4  11   0    0.62    0.09
  -5 -11   0    1.78    0.19
   5 -11   0    1.36    0.15
   5  11   0    1.89    0.15
  -5  11   0    1.92    0.20
  -5  11   0    1.40    0.23
   5  11   0    1.61    0.17
  -6 -11   0    0.98    0.19
   6 -11   0    1.07    0.15
   6  11   0    1.12    0.17
   6  11   0    0.81    0.13
  -6  11   0    1.39    0.25
   7 -11   0    0.55    0.15
  -7 -11   0    0.53    0.19
  -7  11   0    0.44    0.25
   7  11   0    0.74    0.17
  -8 -11   0    0.55    0.21
   8 -11   0    0.74    0.17
   8  11   0    0.93    0.19
  -8  11   0    0.74    0.29
  -9 -11   0    0.36    0.21
   9 -11   0    0.50    0.18
  -9  11   0    0.36    0.30
   9  11   0    0.75    0.20
 -10 -11   0    0.66    0.23
  10 -11   0    0.64    0.19
 -10  11   0    0.71    0.35
  10  11   0    0.63    0.21
   0 -12   0   12.02    0.34
   0 -12   0   12.55    0.40
   0  12   0   12.74    0.40
   0  12   0   11.82    0.36
  -1 -12   0    0.27    0.06
   1 -12   0    0.28    0.10
  -1 -12   0    0.39    0.12
   1 -12   0    0.41    0.08
   1  12   0    0.40    0.09
  -1  12   0    0.38    0.12
  -1  12   0    0.12    0.09
   1  12   0    0.36    0.09
   2 -12   0    2.39    0.17
  -2 -12   0    2.38    0.20
  -2 -12   0    2.17    0.11
   2 -12   0    2.02    0.15
   2  12   0    2.37    0.14
   2  12   0    2.29    0.16
  -2  12   0    2.74    0.23
  -2  12   0    2.17    0.17
  -3 -12   0   31.00    0.90
  -3 -12   0   31.62    0.75
   3 -12   0   31.51    0.85
   3 -12   0   31.07    0.80
  -3  12   0   29.83    0.84
  -3  12   0   29.20    0.94
   3  12   0   31.99    0.84
   3  12   0   33.28    0.86
   4 -12   0    0.79    0.12
   4 -12   0    0.44    0.12
  -4 -12   0    0.66    0.16
   4  12   0    0.29    0.12
  -4  12   0    0.77    0.19
  -4  12   0    0.51    0.15
   4  12   0    0.49    0.09
  -5 -12   0    0.22    0.16
   5 -12   0    0.10    0.12
  -5  12   0    0.21    0.17
  -5  12   0   -0.02    0.19
   5  12   0    0.15    0.09
   5  12   0    0.18    0.13
  -6 -12   0    5.68    0.30
   6 -12   0    4.80    0.27
   6  12   0    5.54    0.25
   6  12   0    5.89    0.30
  -6  12   0    5.11    0.39
  -7 -12   0    0.01    0.16
   7 -12   0    0.09    0.14
   7  12   0   -0.01    0.15
  -7  12   0    0.33    0.25
  -8 -12   0    1.92    0.25
   8 -12   0    1.56    0.20
   8  12   0    2.05    0.23
  -8  12   0    1.48    0.32
   9 -12   0    2.92    0.25
  -9 -12   0    2.16    0.28
   9  12   0    2.52    0.26
  -9  12   0    2.81    0.39
  10 -12   0    4.78    0.32
 -10 -12   0    4.36    0.36
 -10  12   0    4.05    0.48
  10  12   0    4.46    0.34
   1 -13   0    0.49    0.12
   1 -13   0    0.32    0.09
  -1 -13   0    0.41    0.07
  -1 -13   0    0.37    0.13
  -1  13   0    0.46    0.10
  -1  13   0    0.33    0.13
   1  13   0    0.38    0.09
   1  13   0    0.47    0.10
   2 -13   0    1.30    0.12
   2 -13   0    1.04    0.13
  -2 -13   0    1.08    0.16
  -2 -13   0    1.12    0.08
   2  13   0    1.10    0.12
   2  13   0    1.25    0.11
  -2  13   0    1.05    0.17
  -2  13   0    1.07    0.13
   3 -13   0    5.12    0.24
   3 -13   0    5.45    0.24
  -3 -13   0    5.65    0.28
   3  13   0    5.10    0.24
   3  13   0    5.56    0.21
  -3  13   0    4.54    0.26
  -3  13   0    4.83    0.30
  -4 -13   0   26.71    0.80
   4 -13   0   26.48    0.72
  -4  13   0   25.70    0.85
  -4  13   0   24.89    0.75
   4  13   0   27.95    0.75
   4  13   0   27.49    0.75
   5 -13   0    3.90    0.24
  -5 -13   0    3.79    0.26
   5  13   0    4.43    0.26
  -5  13   0    4.10    0.36
   5  13   0    4.02    0.21
   6 -13   0    6.05    0.29
  -6 -13   0    6.15    0.34
   6  13   0    6.04    0.31
  -6  13   0    6.13    0.42
   7 -13   0    1.61    0.19
  -7 -13   0    1.89    0.24
  -7  13   0    1.59    0.30
   7  13   0    1.10    0.19
  -8 -13   0    0.95    0.23
   8 -13   0    1.00    0.18
  -8  13   0    0.94    0.30
   8  13   0    1.10    0.20
  -9 -13   0    0.27    0.22
   9 -13   0    0.47    0.18
  -9  13   0    0.71    0.33
   9  13   0    0.85    0.21
 -10 -13   0   -0.10    0.22
  10 -13   0    0.41    0.20
  10  13   0    0.02    0.20
 -10  13   0    0.22    0.35
   0 -14   0    5.94    0.27
   0 -14   0    5.49    0.20
   0  14   0    5.39    0.26
   0  14   0    4.63    0.21
  -1 -14   0    1.66    0.12
  -1 -14   0    1.80    0.18
   1 -14   0    1.77    0.13
   1 -14   0    1.82    0.16
  -1  14   0    1.94    0.17
   1  14   0    1.49    0.13
   1  14   0    1.68    0.14
  -1  14   0    1.81    0.18
   2 -14   0    2.07    0.18
   2 -14   0    2.06    0.15
  -2 -14   0    2.19    0.20
  -2 -14   0    1.89    0.12
  -2  14   0    2.07    0.16
   2  14   0    2.27    0.16
   2  14   0    2.12    0.17
  -2  14   0    1.82    0.20
  -3 -14   0    0.00    0.14
   3 -14   0    0.40    0.13
   3 -14   0    0.04    0.10
   3  14   0   -0.06    0.11
   3  14   0    0.27    0.10
  -3  14   0    0.00    0.17
  -3  14   0    0.09    0.14
  -4 -14   0    0.18    0.16
   4 -14   0    0.01    0.11
   4  14   0    0.05    0.12
  -4  14   0    0.10    0.15
   4  14   0    0.11    0.09
  -4  14   0    0.27    0.19
  -5 -14   0    0.94    0.20
   5 -14   0    1.04    0.16
  -5  14   0    0.74    0.24
   5  14   0    0.75    0.16
   5  14   0    0.82    0.11
   6 -14   0    0.26    0.14
  -6 -14   0    0.22    0.17
  -6  14   0    0.21    0.24
   6  14   0    0.19    0.15
  -7 -14   0    0.91    0.22
   7 -14   0    0.95    0.17
   7  14   0    0.45    0.17
  -7  14   0    0.99    0.29
   8 -14   0    6.25    0.33
  -8 -14   0    6.31    0.38
  -8  14   0    6.52    0.49
   8  14   0    7.10    0.36
  -9 -14   0    2.16    0.29
   9 -14   0    1.47    0.22
  -9  14   0    1.76    0.38
   9  14   0    1.98    0.24
 -10 -14   0    0.27    0.24
   0  15   0    0.46    0.10
   0  15   0    0.62    0.14
  -1 -15   0    2.35    0.13
   1 -15   0    2.32    0.16
   1 -15   0    2.46    0.21
  -1 -15   0    2.66    0.21
  -1  15   0    2.42    0.23
   1  15   0    2.35    0.17
  -1  15   0    2.27    0.18
   1  15   0    2.56    0.20
  -2 -15   0    0.76    0.16
   2 -15   0    0.35    0.11
   2 -15   0    0.51    0.13
  -2  15   0    0.35    0.17
  -2  15   0    0.40    0.13
   2  15   0    0.60    0.12
   2  15   0    0.74    0.12
   3 -15   0    1.23    0.15
  -3 -15   0    1.32    0.19
   3 -15   0    1.23    0.14
  -3  15   0    1.13    0.17
   3  15   0    1.50    0.13
   3  15   0    1.28    0.15
  -3  15   0    1.25    0.21
  -4 -15   0    0.15    0.17
   4 -15   0    0.26    0.13
   4  15   0    0.39    0.14
   4  15   0    0.29    0.11
  -4  15   0    0.36    0.21
   5 -15   0    6.34    0.30
  -5 -15   0    6.76    0.34
  -5  15   0    6.78    0.43
   5  15   0    6.55    0.31
   6 -15   0    1.26    0.17
  -6 -15   0    1.74    0.24
   6  15   0    1.42    0.19
  -6  15   0    1.52    0.29
  -7 -15   0   12.97    0.52
   7 -15   0   12.27    0.45
  -7  15   0   11.90    0.61
   7  15   0   13.01    0.47
   8 -15   0    4.23    0.29
  -8 -15   0    4.59    0.34
  -8  15   0    4.42    0.44
   8  15   0    4.13    0.31
  -9 -15   0    5.21    0.38
   9 -15   0    5.40    0.33
   9  15   0    5.02    0.34
  -9  15   0    4.95    0.49
   0 -16   0    4.55    0.19
   0 -16   0    4.40    0.26
   0  16   0    4.87    0.27
   0  16   0    3.96    0.21
   1 -16   0    3.86    0.19
  -1 -16   0    3.61    0.25
   1 -16   0    4.34    0.25
  -1 -16   0    4.00    0.17
  -1  16   0    3.58    0.21
   1  16   0    3.66    0.20
  -1  16   0    3.63    0.26
   1  16   0    3.86    0.22
  -2 -16   0    4.48    0.28
   2 -16   0    4.60    0.24
   2 -16   0    4.24    0.22
   2  16   0    4.74    0.23
  -2  16   0    5.05    0.26
   2  16   0    5.18    0.24
  -2  16   0    3.68    0.30
   3 -16   0   -0.09    0.13
   3 -16   0    0.15    0.12
  -3 -16   0    0.00    0.16
   3  16   0    0.11    0.11
  -3  16   0    0.05    0.18
  -3  16   0   -0.03    0.15
   3  16   0    0.04    0.12
   4 -16   0    0.70    0.14
  -4 -16   0    0.82    0.18
   4  16   0    0.57    0.15
  -4  16   0    0.80    0.23
   5 -16   0    0.89    0.16
  -5 -16   0    0.90    0.20
   5  16   0    0.92    0.17
  -5  16   0    1.19    0.26
  -6 -16   0    6.13    0.35
   6 -16   0    5.39    0.29
  -6  16   0    5.95    0.45
   6  16   0    6.29    0.32
  -7 -16   0    1.61    0.25
   7 -16   0    1.44    0.20
   7  16   0    1.48    0.21
  -7  16   0    1.59    0.33
  -8 -16   0    3.31    0.32
   8 -16   0    2.41    0.24
  -8  16   0    1.97    0.37
   8  16   0    3.09    0.26
  -9 -16   0    0.33    0.24
   9 -16   0    0.35    0.19
   9  16   0    0.03    0.19
  -9  16   0   -0.06    0.33
   0 -17   0    0.22    0.09
   0 -17   0    0.59    0.16
   0  17   0    0.55    0.15
   0  17   0    0.28    0.12
   1 -17   0    3.49    0.19
  -1 -17   0    3.53    0.17
   1 -17   0    3.77    0.25
  -1 -17   0    3.72    0.26
   1  17   0    3.28    0.20
  -1  17   0    3.46    0.21
  -1  17   0    3.89    0.28
   1  17   0    3.96    0.24
   2 -17   0    3.39    0.24
   2 -17   0    3.21    0.19
  -2 -17   0    3.65    0.27
  -2  17   0    3.26    0.29
  -2  17   0    3.16    0.24
   2  17   0    3.59    0.22
   2  17   0    2.94    0.20
  -3 -17   0   14.01    0.52
   3 -17   0   13.29    0.43
   3  17   0   15.02    0.46
  -3  17   0   13.33    0.55
   3  17   0   13.43    0.44
  -4 -17   0    1.53    0.23
   4 -17   0    1.75    0.17
  -4  17   0    1.60    0.26
   4  17   0    1.40    0.17
   5 -17   0    7.00    0.31
  -5 -17   0    6.79    0.37
   5  17   0    6.71    0.32
  -5  17   0    6.67    0.44
   6 -17   0    5.12    0.28
  -6 -17   0    5.46    0.33
   6  17   0    4.64    0.29
  -6  17   0    5.10    0.42
   7 -17   0    0.06    0.16
  -7 -17   0    0.49    0.22
   7  17   0    0.24    0.17
  -7  17   0    0.61    0.29
  -8 -17   0    0.53    0.25
   8 -17   0    0.15    0.18
  -8  17   0    0.40    0.33
   8  17   0    0.47    0.19
  -9 -17   0    0.06    0.24
   0 -18   0    0.71    0.11
   0  18   0    0.78    0.14
   1 -18   0    0.12    0.10
  -1 -18   0    0.10    0.16
   1 -18   0    0.23    0.16
   1  18   0    0.05    0.14
  -1  18   0    0.02    0.13
   1  18   0   -0.10    0.11
  -1  18   0   -0.07    0.16
   2 -18   0    1.33    0.14
  -2 -18   0    1.42    0.21
   2 -18   0    1.30    0.18
  -2  18   0    1.55    0.18
   2  18   0    1.16    0.15
  -2  18   0    1.47    0.23
   2  18   0    1.38    0.16
   3 -18   0    0.16    0.13
  -3 -18   0    0.12    0.18
  -3  18   0    0.05    0.20
   3  18   0    0.00    0.13
  -4 -18   0    3.70    0.28
   4 -18   0    3.92    0.24
  -4  18   0    3.73    0.35
   4  18   0    3.81    0.25
  -5 -18   0    0.48    0.21
   5 -18   0    0.63    0.16
  -5  18   0    0.69    0.26
   5  18   0    0.58    0.16
   6 -18   0    3.85    0.27
  -6 -18   0    4.35    0.31
   6  18   0    3.80    0.28
  -6  18   0    4.17    0.40
  -7 -18   0    3.08    0.32
   7 -18   0    2.62    0.24
   7  18   0    2.87    0.26
  -7  18   0    3.12    0.40
   8 -18   0   -0.02    0.18
  -8 -18   0   -0.09    0.23
   8  18   0   -0.06    0.19
  -8  18   0    0.67    0.34
   0  19   0    0.68    0.14
   1 -19   0    3.64    0.27
   1 -19   0    3.61    0.21
  -1 -19   0    3.50    0.27
  -1  19   0    3.43    0.30
  -1  19   0    3.12    0.22
   1  19   0    3.61    0.21
   1  19   0    4.02    0.26
   2 -19   0    0.48    0.13
   2 -19   0    0.48    0.16
  -2 -19   0    0.79    0.20
   2  19   0    0.67    0.14
  -2  19   0    0.75    0.21
   3 -19   0    2.04    0.18
  -3 -19   0    2.41    0.26
   3  19   0    2.42    0.19
  -3  19   0    2.18    0.27
  -4 -19   0    2.07    0.26
   4 -19   0    2.22    0.19
   4  19   0    2.22    0.20
  -4  19   0    1.68    0.28
  -5 -19   0    0.06    0.18
   5 -19   0    0.09    0.15
  -5  19   0    0.27    0.25
   5  19   0    0.17    0.16
   6 -19   0    1.96    0.21
  -6 -19   0    2.08    0.28
   6  19   0    1.58    0.21
  -6  19   0    1.60    0.33
  -7 -19   0    0.20    0.23
   7 -19   0    0.22    0.17
  -7  19   0    0.21    0.31
   7  19   0    0.03    0.18
  -8 -19   0    1.51    0.29
  -8  19   0    1.40    0.38
   0  20   0    0.96    0.16
   1 -20   0    0.07    0.11
  -1 -20   0    0.17    0.18
   1 -20   0    0.12    0.17
  -1  20   0   -0.10    0.18
   1  20   0    0.22    0.13
  -1  20   0    0.07    0.14
   1  20   0    0.22    0.16
   2 -20   0    0.31    0.13
  -2 -20   0    0.40    0.20
   2  20   0    0.40    0.14
  -2  20   0    0.40    0.21
  -3 -20   0    0.47    0.21
   3 -20   0    0.42    0.14
   3  20   0    0.38    0.15
  -3  20   0    0.78    0.24
   4 -20   0    1.57    0.18
  -4 -20   0    1.89    0.26
  -4  20   0    1.90    0.29
   4  20   0    2.03    0.20
  -5 -20   0   -0.27    0.21
   5 -20   0    0.00    0.15
   5  20   0    0.12    0.16
  -5  20   0    0.50    0.27
  -6 -20   0    0.54    0.24
   6 -20   0    0.41    0.17
   6  20   0    0.53    0.18
  -6  20   0    0.11    0.29
  -7 -20   0   -0.05    0.23
   7 -20   0    0.37    0.18
  -7  20   0    0.31    0.32
   7  20   0    0.14    0.19
   0 -21   0    1.08    0.21
   0  21   0    0.44    0.15
  -1 -21   0    0.47    0.19
   1 -21   0    0.10    0.12
   1 -21   0    0.12    0.18
  -1  21   0   -0.23    0.19
   1  21   0   -0.18    0.13
   2 -21   0    4.29    0.23
  -2 -21   0    4.28    0.32
  -2  21   0    4.63    0.35
   2  21   0    3.90    0.24
   3 -21   0    7.75    0.32
  -3 -21   0    7.54    0.41
  -3  21   0    7.71    0.44
   3  21   0    7.82    0.33
  -4 -21   0   -0.04    0.20
   4 -21   0    0.05    0.14
  -4  21   0    0.11    0.25
   4  21   0    0.16    0.15
   5 -21   0    1.22    0.19
  -5 -21   0    1.12    0.26
  -5  21   0    1.39    0.32
   5  21   0    1.34    0.20
  -6 -21   0    5.56    0.39
   6 -21   0    5.01    0.30
   6  21   0    4.81    0.31
  -6  21   0    5.36    0.48
   7 -21   0    8.18    0.39
  -7  21   0    9.98    0.61
   7  21   0    8.88    0.42
   0 -22   0    0.88    0.21
   1 -22   0    0.14    0.19
  -1 -22   0    0.24    0.20
   1  22   0    0.15    0.15
  -1  22   0    0.25    0.21
   2 -22   0    1.57    0.17
  -2 -22   0    1.99    0.26
   2  22   0    1.84    0.19
  -2  22   0    2.35    0.28
   3 -22   0    1.36    0.17
  -3 -22   0    1.36    0.25
  -3  22   0    1.63    0.29
   3  22   0    1.21    0.18
  -4 -22   0    1.09    0.25
   4 -22   0    0.48    0.16
  -4  22   0    0.42    0.27
   4  22   0    0.69    0.18
  -5 -22   0    0.54    0.25
   5 -22   0    0.38    0.17
   5  22   0    0.45    0.18
  -5  22   0    0.73    0.30
   6 -22   0    7.14    0.36
  -6 -22   0    7.97    0.45
  -6  22   0    8.20    0.55
   6  22   0    7.78    0.38
   0 -23   0    0.42    0.21
  -1 -23   0    0.24    0.21
  -1  23   0   -0.03    0.21
   1  23   0    0.07    0.16
  -2 -23   0    1.58    0.27
   2 -23   0    1.36    0.17
  -2  23   0    1.73    0.28
   2  23   0    1.62    0.19
   3 -23   0    1.44    0.18
  -3 -23   0    1.61    0.27
  -3  23   0    1.89    0.30
   3  23   0    1.45    0.20
  -4 -23   0    0.17    0.24
   4 -23   0    0.02    0.15
  -4  23   0    0.14    0.27
   4  23   0    0.07    0.17
  -5 -23   0   -0.02    0.24
   5 -23   0    0.11    0.17
  -5  23   0    0.01    0.29
   5  23   0   -0.04    0.17
  -6  23   0    3.60    0.43
   0 -24   0    0.88    0.23
  -1 -24   0    2.82    0.30
  -2 -24   0    1.03    0.25
   2  24   0    0.54    0.17
  -2  24   0    0.77    0.26
   3 -24   0    0.03    0.15
  -3 -24   0    0.13    0.23
  -3  24   0    0.24    0.26
   3  24   0    0.15    0.17
  -4 -24   0    0.17    0.24
   4 -24   0   -0.11    0.15
   4  24   0    0.20    0.17
  -4  24   0   -0.05    0.27
   5 -24   0    0.31    0.18
  -5  24   0    0.52    0.31
   5  24   0   -0.05    0.18
  -1 -25   0    1.06    0.25
  -2 -25   0    1.47    0.28
   2  25   0    1.44    0.21
  -3 -25   0    0.09    0.23
  -3  25   0    0.15    0.27
   3  25   0    0.25    0.18
  -4 -25   0    0.13    0.25
   4 -25   0   -0.06    0.16
   4  25   0   -0.32    0.18
  -4  25   0   -0.05    0.29
  -1 -26   0    0.60    0.25
  -2 -26   0    0.52    0.26
  -3 -26   0    0.03    0.24
   3  26   0   -0.07    0.18
   4 -26   0    0.56    0.18
  -4  26   0    0.96    0.33
  -1 -27   0    0.90    0.28
  -2 -27   0    0.48    0.27
  12   0  -1   -0.26    0.23
  11   0  -1   18.36    0.71
 -10   0   1    0.17    0.23
  -9   0   1    0.42    0.23
  -9   0   1    0.09    0.25
   9   0  -1    0.54    0.14
  -8   0   1    0.13    0.21
   8   0  -1   -0.08    0.12
  -8   0   1    0.27    0.23
  -8   0   1   -0.08    0.14
   7   0  -1    7.33    0.30
  -7   0   1    7.16    0.42
  -7   0   1    7.19    0.38
  -7   0   1    8.08    0.31
  -6   0   1   -0.07    0.16
  -6   0   1   -0.04    0.15
  -6   0   1   -0.06    0.11
  -5   0   1   11.88    0.38
  -5   0   1   12.37    0.47
  -5   0   1   12.58    0.37
  -5   0   1   12.21    0.43
  -4   0   1   -0.11    0.08
  -4   0   1    0.02    0.09
  -4   0   1    0.07    0.13
  -4   0   1   -0.02    0.12
  -3   0   1   54.55    1.43
  -3   0   1   55.05    1.52
  -3   0   1   57.28    1.41
  -3   0   1   54.79    1.32
  -2   0   1   -0.07    0.07
  -2   0   1   -0.08    0.10
  -2   0   1   -0.01    0.07
  -2   0   1   -0.03    0.10
  -1   0   1  200.76    4.84
  -1   0   1  192.46    4.99
  -1   0   1  197.38    4.58
  -1   0   1  196.52    5.20
  -1   0  -1   18.88    0.50
   1   0   1   18.98    0.46
  -1   0  -1   19.34    0.54
  -2   0  -1    0.00    0.11
  -2   0  -1   -0.15    0.10
  -2   0  -1   -0.05    0.06
   2   0   1   -0.05    0.05
   3   0   1  716.78   16.72
  -3   0  -1  714.31   19.03
  -3   0  -1  710.86   17.76
  -3   0  -1  743.35   18.20
  -4   0  -1    0.11    0.13
  -4   0  -1   -0.07    0.08
  -4   0  -1    0.10    0.14
   4   0   1    0.04    0.07
  -5   0  -1  420.99   10.51
  -5   0  -1  411.88   10.22
  -5   0  -1  427.02   11.01
   5   0   1  411.73    9.68
   6   0   1    0.00    0.08
  -6   0  -1   -0.19    0.17
  -6   0  -1   -0.07    0.10
  -6   0  -1    0.02    0.16
  -7   0  -1    8.58    0.41
  -7   0  -1    7.79    0.31
  -7   0  -1    8.15    0.45
   7   0   1    7.94    0.30
  -8   0  -1    0.09    0.21
  -8   0  -1    0.04    0.23
   8   0   1   -0.06    0.11
  -9   0  -1    1.13    0.26
 -10   0  -1   -0.21    0.24
  10   0   1   -0.13    0.19
  11   0   1    9.72    0.52
  12   0   1   -0.06    0.24
  12  -1  -1   -0.24    0.23
  11   1  -1    7.63    0.46
 -10  -1   1    1.59    0.27
 -10   1   1    1.08    0.32
  10   1  -1    2.21    0.27
  -9  -1   1    2.21    0.28
   9  -1  -1    2.01    0.19
  -9   1   1    1.67    0.27
  -9   1   1    1.55    0.31
  -8  -1   1   -0.01    0.22
  -8  -1   1   -0.16    0.14
  -8  -1   1   -0.08    0.20
   8  -1  -1   -0.15    0.12
  -8   1   1   -0.24    0.20
   8   1  -1    0.01    0.12
  -8   1   1    0.19    0.23
  -7  -1   1    5.07    0.37
   7  -1  -1    4.52    0.24
  -7  -1   1    4.78    0.26
  -7  -1   1    4.66    0.33
  -7   1   1    5.09    0.24
   7   1  -1    4.31    0.24
  -7   1   1    5.02    0.38
  -7   1   1    4.65    0.33
  -6  -1   1    1.49    0.15
   6  -1  -1    1.27    0.13
  -6  -1   1    1.42    0.19
  -6  -1   1    1.22    0.20
  -6  -1   1    1.54    0.14
  -6   1   1    1.38    0.14
  -6   1   1    1.54    0.19
  -6   1   1    1.17    0.21
  -5  -1   1    4.19    0.22
  -5  -1   1    3.90    0.27
  -5  -1   1    4.88    0.30
  -5  -1   1    4.46    0.21
  -5   1   1    4.19    0.30
  -5   1   1    4.27    0.27
  -5   1   1    3.36    0.20
  -4  -1   1    1.81    0.16
  -4  -1   1    2.12    0.17
  -4  -1   1    1.68    0.17
  -4  -1   1    1.86    0.12
  -4   1   1    1.77    0.16
  -4   1   1    1.59    0.18
  -4   1   1    1.60    0.12
  -4   1   1    1.68    0.15
  -3  -1   1  153.08    4.10
  -3  -1   1  155.36    3.92
  -3  -1   1  154.45    3.81
  -3  -1   1  155.61    3.58
  -3   1   1  157.61    3.80
  -3   1   1  156.14    3.91
  -3   1   1  154.96    4.10
  -3   1   1  151.06    3.59
  -2  -1   1   15.74    0.44
  -2  -1   1   15.69    0.48
  -2  -1   1   16.48    0.41
  -2  -1   1   15.84    0.45
  -2   1   1   15.63    0.41
  -2   1   1   16.16    0.49
  -2   1   1   16.24    0.45
  -2   1   1   15.39    0.43
   1  -1  -1   73.36    1.99
  -1  -1   1   77.60    1.82
  -1  -1   1   80.07    2.08
  -1  -1   1   80.37    2.02
  -1   1   1   79.93    1.92
  -1   1   1   80.30    2.08
   0  -1  -1    0.26    0.02
   0  -1   1    0.28    0.03
   0  -1   1    0.30    0.02
   0   1   1    0.32    0.02
   0   1  -1    0.36    0.02
  -1  -1  -1  161.28    4.14
   1  -1   1  161.81    3.79
  -1  -1  -1  170.80    4.01
  -1  -1  -1  164.66    3.76
  -1   1  -1  164.45    4.28
  -1   1  -1  159.48    4.03
   1   1   1  156.84    4.30
   2  -1   1    9.48    0.26
  -2  -1  -1    9.51    0.28
  -2  -1  -1    9.45    0.35
  -2  -1  -1    9.45    0.32
  -2  -1  -1    9.35    0.25
  -2   1  -1    9.54    0.34
  -2   1  -1    9.23    0.27
  -2   1  -1    9.44    0.32
  -3  -1  -1  204.88    5.40
  -3  -1  -1  213.38    4.75
  -3  -1  -1  205.59    5.02
  -3  -1  -1  203.15    5.15
   3  -1   1  199.30    4.74
  -3   1  -1  203.15    5.01
  -3   1  -1  204.27    5.14
  -3   1  -1  202.49    5.40
  -4  -1  -1   47.30    1.22
  -4  -1  -1   46.95    1.32
  -4  -1  -1   46.69    1.23
   4  -1   1   46.07    1.12
  -4   1  -1   45.69    1.22
  -4   1  -1   45.95    1.33
  -4   1  -1   47.44    1.21
  -5  -1  -1   45.19    1.31
  -5  -1  -1   43.05    1.21
  -5  -1  -1   47.07    1.21
   5  -1   1   46.15    1.11
  -5   1  -1   44.55    1.21
  -5   1  -1   44.82    1.31
   5   1   1   46.08    1.10
  -5   1  -1   45.46    1.19
  -6  -1  -1   60.92    1.60
  -6  -1  -1   61.43    1.60
   6  -1   1   60.02    1.47
  -6  -1  -1   57.90    1.73
   6   1   1   61.16    1.46
  -6   1  -1   61.27    1.74
  -6   1  -1   60.28    1.60
  -6   1  -1   61.49    1.58
  -7  -1  -1    0.82    0.21
  -7  -1  -1    0.78    0.14
   7  -1   1    0.72    0.12
  -7   1  -1    0.29    0.21
   7   1   1    0.86    0.12
  -7   1  -1    0.70    0.20
  -7   1  -1    0.57    0.13
   8  -1   1    4.27    0.24
  -8  -1  -1    4.19    0.36
  -8   1  -1    4.35    0.37
  -8   1  -1    4.29    0.37
   8   1   1    3.67    0.24
   9  -1   1   -0.08    0.12
  -9  -1  -1    0.41    0.24
   9   1   1    0.24    0.19
  -9   1  -1   -0.23    0.25
  -9   1  -1    0.30    0.24
 -10  -1  -1    4.36    0.37
  10   1   1    3.64    0.32
 -10   1  -1    3.62    0.35
 -11  -1  -1    7.27    0.48
  11  -1   1    7.58    0.46
  11   1   1    7.16    0.46
  12  -1   1    1.04    0.28
  12   1   1    0.51    0.26
  12  -2  -1   -0.04    0.24
 -11  -2   1    5.68    0.42
  11   2  -1    5.26    0.40
 -10  -2   1    1.94    0.29
  10  -2  -1    1.78    0.19
 -10   2   1    1.87    0.35
  10   2  -1    1.86    0.25
  -9  -2   1    8.67    0.45
   9  -2  -1    8.20    0.34
  -9   2   1    8.52    0.46
   9   2  -1    8.03    0.41
  -9   2   1    8.40    0.51
  -8  -2   1    0.62    0.17
   8  -2  -1    0.44    0.14
  -8  -2   1    0.33    0.21
  -8   2   1    0.69    0.22
  -8   2   1    0.61    0.25
   8   2  -1    0.64    0.18
   8   2  -1    0.30    0.13
  -7  -2   1   -0.06    0.18
  -7  -2   1    0.03    0.13
   7  -2  -1    0.10    0.13
   7  -2  -1    0.07    0.11
  -7   2   1   -0.05    0.18
  -7   2   1    0.23    0.20
  -6  -2   1   43.83    1.18
  -6  -2   1   44.34    1.08
  -6  -2   1   43.45    1.19
  -6  -2   1   42.59    1.29
   6  -2  -1   44.35    1.09
  -6   2   1   42.43    1.30
  -6   2   1   44.84    1.19
  -5  -2   1   27.38    0.77
  -5  -2   1   26.64    0.84
  -5  -2   1   28.24    0.70
  -5  -2   1   26.53    0.79
   5  -2  -1   28.17    0.71
  -5   2   1   26.72    0.77
  -5   2   1   28.20    0.86
  -4  -2   1    0.38    0.08
  -4  -2   1    0.41    0.14
  -4  -2   1    0.39    0.14
  -4  -2   1    0.20    0.10
  -4   2   1    0.39    0.13
  -4   2   1    0.21    0.14
  -3  -2   1   52.09    1.36
   3  -2  -1   49.76    1.35
  -3  -2   1   53.70    1.24
  -3  -2   1   52.07    1.43
  -3  -2   1   54.49    1.34
  -3   2   1   52.97    1.45
  -3   2   1   52.14    1.33
  -3   2   1   51.68    1.25
  -2  -2   1   40.05    0.99
  -2  -2   1   38.38    1.01
   2  -2  -1   37.02    0.99
  -2  -2   1   39.00    0.91
  -2   2   1   38.48    1.06
  -2   2   1   37.92    0.92
  -2   2   1   39.23    0.98
  -1  -2   1    8.96    0.23
   1  -2  -1    9.17    0.26
  -1  -2   1    8.96    0.27
   1   2  -1    8.68    0.25
  -1   2   1    9.07    0.25
  -1   2   1    9.45    0.24
  -1   2   1    8.99    0.28
   1   2  -1    8.90    0.25
   0  -2  -1    3.18    0.11
   0  -2   1    3.29    0.09
   0  -2  -1    3.19    0.09
   0  -2   1    2.70    0.10
   0   2   1    3.42    0.10
   0   2  -1    3.35    0.09
   0   2   1    3.07    0.09
   0   2  -1    3.30    0.10
   1  -2   1    3.34    0.12
  -1  -2  -1    3.05    0.17
  -1  -2  -1    3.16    0.12
  -1   2  -1    3.12    0.14
  -1   2  -1    3.12    0.17
   1   2   1    3.52    0.13
   2  -2   1    6.43    0.21
  -2  -2  -1    6.72    0.22
  -2  -2  -1    6.65    0.28
   2  -2   1    6.14    0.20
  -2  -2  -1    6.77    0.19
  -2   2  -1    6.63    0.25
   2   2   1    6.50    0.24
  -2   2  -1    6.44    0.28
  -3  -2  -1  134.01    3.40
   3  -2   1  133.02    3.11
  -3  -2  -1  138.52    3.10
  -3   2  -1  135.98    3.38
   3   2   1  128.62    3.54
  -3   2  -1  132.30    3.30
  -3   2  -1  135.56    3.57
   4  -2   1    0.99    0.10
  -4  -2  -1    1.22    0.10
  -4  -2  -1    0.83    0.15
  -4  -2  -1    1.30    0.12
  -4   2  -1    1.03    0.09
  -4   2  -1    0.91    0.15
  -4   2  -1    1.10    0.17
   5  -2   1   68.88    1.63
  -5  -2  -1   68.39    1.78
  -5  -2  -1   69.46    1.77
  -5   2  -1   66.33    1.91
  -5   2  -1   68.64    1.76
  -5   2  -1   67.36    1.75
  -6  -2  -1    2.29    0.22
   6  -2   1    2.22    0.18
  -6  -2  -1    2.01    0.18
   6   2   1    2.30    0.14
  -6   2  -1    1.83    0.16
  -6   2  -1    2.48    0.23
  -6   2  -1    2.16    0.25
   7  -2   1   13.07    0.41
  -7  -2  -1   13.94    0.45
  -7  -2  -1   12.80    0.51
  -7   2  -1   12.77    0.51
   7   2   1   13.33    0.40
   7   2   1   12.72    0.49
  -7   2  -1   13.24    0.56
   8  -2   1    0.50    0.14
  -8  -2  -1    1.09    0.24
  -8  -2  -1    0.78    0.16
  -8   2  -1    0.62    0.23
  -8   2  -1    0.69    0.26
   8   2   1    0.58    0.18
   9  -2   1    0.08    0.13
  -9  -2  -1    0.31    0.23
  -9   2  -1    0.15    0.23
   9   2   1    0.07    0.18
  -9   2  -1   -0.25    0.25
 -10  -2  -1    2.65    0.33
  10   2   1    2.64    0.29
 -10   2  -1    2.68    0.37
 -10   2  -1    2.40    0.32
 -11  -2  -1    3.84    0.37
  11   2   1    3.57    0.33
  12  -2   1    0.47    0.26
 -11  -3   1    1.04    0.28
 -11   3   1    0.66    0.34
 -10  -3   1    1.40    0.27
  10  -3  -1    0.99    0.18
  10   3  -1    1.13    0.23
 -10   3   1    1.06    0.32
   9  -3  -1    2.18    0.20
  -9  -3   1    2.39    0.28
   9   3  -1    2.39    0.25
  -9   3   1    2.22    0.28
  -9   3   1    2.27    0.33
  -8  -3   1   17.84    0.64
  -8  -3   1   18.81    0.59
   8  -3  -1   17.59    0.54
  -8   3   1   17.93    0.71
   8   3  -1   17.51    0.63
  -8   3   1   18.91    0.64
  -7  -3   1    5.29    0.33
  -7  -3   1    5.21    0.25
  -7  -3   1    4.87    0.28
   7  -3  -1    4.97    0.26
   7  -3  -1    4.74    0.26
  -7   3   1    4.59    0.38
  -7   3   1    5.13    0.34
   7   3  -1    5.16    0.29
   6  -3  -1    1.93    0.15
  -6  -3   1    1.84    0.21
  -6  -3   1    1.81    0.14
   6  -3  -1    2.02    0.17
  -6  -3   1    1.88    0.17
  -6   3   1    2.13    0.20
  -6   3   1    1.98    0.24
   6   3  -1    1.76    0.17
  -5  -3   1    1.34    0.11
   5  -3  -1    1.06    0.12
  -5  -3   1    1.23    0.14
   5  -3  -1    0.78    0.11
  -5  -3   1    1.23    0.17
  -5   3   1    1.25    0.16
  -5   3   1    1.23    0.19
   5   3  -1    1.23    0.13
  -4  -3   1   19.64    0.58
   4  -3  -1   19.32    0.52
   4  -3  -1   18.95    0.54
  -4  -3   1   20.09    0.50
  -4  -3   1   19.05    0.56
  -4   3   1   18.88    0.56
   4   3  -1   18.20    0.57
  -4   3   1   19.14    0.62
   3  -3  -1  170.82    4.37
  -3  -3   1  175.86    4.26
  -3  -3   1  173.83    4.00
  -3  -3   1  174.49    4.39
   3  -3  -1  173.58    4.02
   3   3  -1  165.66    4.55
  -3   3   1  175.46    4.59
  -3   3   1  177.05    4.25
  -2  -3   1    0.36    0.06
  -2  -3   1    0.41    0.09
   2  -3  -1    0.33    0.07
  -2  -3   1    0.33    0.10
   2  -3  -1    0.25    0.07
  -2   3   1    0.39    0.08
   2   3  -1    0.30    0.06
  -2   3   1    0.32    0.10
  -1  -3   1   23.15    0.61
  -1  -3   1   22.99    0.54
   1  -3  -1   22.73    0.56
   1  -3  -1   22.95    0.61
  -1   3   1   22.78    0.64
   1   3  -1   22.89    0.61
   1   3  -1   23.15    0.59
  -1   3   1   23.68    0.58
   0  -3  -1    0.85    0.07
   0  -3   1    0.82    0.07
   0  -3  -1    0.99    0.07
   0  -3   1    0.84    0.07
   0   3   1    0.86    0.06
   0   3   1    0.97    0.07
   0   3  -1    0.82    0.06
   0   3  -1    1.01    0.08
  -1  -3  -1  197.76    4.61
  -1  -3  -1  209.12    4.88
  -1  -3  -1  196.19    5.08
   1  -3   1  201.32    5.05
  -1   3  -1  200.54    4.92
   1   3   1  192.35    5.27
  -1   3  -1  204.29    5.28
  -2  -3  -1   12.36    0.39
   2  -3   1   11.42    0.33
  -2  -3  -1   12.65    0.30
  -2  -3  -1   11.72    0.35
  -2   3  -1   12.09    0.36
  -2   3  -1   12.50    0.41
   2   3   1   12.65    0.36
  -3  -3  -1    6.45    0.24
  -3  -3  -1    6.74    0.29
  -3  -3  -1    6.75    0.20
   3  -3   1    6.37    0.21
   3  -3   1    6.39    0.22
  -3   3  -1    6.49    0.30
  -3   3  -1    6.75    0.28
   3   3   1    6.18    0.24
   4  -3   1    1.87    0.15
   4  -3   1    1.80    0.14
  -4  -3  -1    1.87    0.18
  -4  -3  -1    1.70    0.13
  -4  -3  -1    2.00    0.16
  -4   3  -1    2.00    0.17
  -4   3  -1    2.13    0.20
   4   3   1    1.93    0.18
  -5  -3  -1   21.63    0.66
   5  -3   1   21.72    0.58
   5  -3   1   20.96    0.60
  -5  -3  -1   22.13    0.62
  -5  -3  -1   22.71    0.56
  -5   3  -1   21.62    0.65
   5   3   1   20.79    0.66
  -5   3  -1   21.34    0.72
   6  -3   1    0.19    0.11
  -6  -3  -1    0.41    0.13
  -6  -3  -1    0.33    0.17
   6  -3   1    0.22    0.10
   6   3   1    0.22    0.09
  -6   3  -1    0.40    0.19
   6   3   1    0.22    0.13
  -6   3  -1    0.32    0.17
  -7  -3  -1    4.14    0.25
  -7  -3  -1    3.86    0.30
   7  -3   1    3.98    0.23
  -7   3  -1    3.81    0.33
   7   3   1    3.49    0.21
   7   3   1    4.04    0.28
  -7   3  -1    4.40    0.33
   8  -3   1    1.02    0.15
  -8  -3  -1    1.04    0.18
  -8  -3  -1    1.02    0.24
  -8   3  -1    0.93    0.27
   8   3   1    1.08    0.20
  -8   3  -1    1.08    0.24
  -9  -3  -1    2.34    0.30
   9  -3   1    1.73    0.18
   9   3   1    2.39    0.25
  -9   3  -1    2.02    0.33
  -9   3  -1    2.06    0.29
  10  -3   1    0.30    0.15
 -10  -3  -1    0.22    0.25
 -10   3  -1    0.23    0.30
  10   3   1   -0.11    0.19
 -11  -3  -1    0.16    0.26
  11   3   1   -0.10    0.22
 -12  -3  -1   -0.13    0.28
 -11  -4   1    4.89    0.40
 -11   4   1    5.65    0.52
 -10  -4   1   11.80    0.53
  10  -4  -1   11.13    0.43
 -10   4   1   11.06    0.61
  10   4  -1   11.38    0.50
  -9  -4   1    0.27    0.21
  -9  -4   1    0.34    0.18
   9  -4  -1    0.34    0.15
   9   4  -1    0.39    0.18
  -9   4   1    0.13    0.26
   8  -4  -1    1.50    0.17
  -8  -4   1    1.82    0.25
  -8  -4   1    1.51    0.19
  -8   4   1    1.27    0.24
   8   4  -1    1.38    0.19
  -8   4   1    1.23    0.27
  -7  -4   1    0.05    0.18
  -7  -4   1    0.08    0.11
   7  -4  -1    0.14    0.13
  -7  -4   1    0.05    0.15
  -7   4   1   -0.02    0.21
   7   4  -1    0.30    0.14
  -7   4   1    0.24    0.19
  -6  -4   1    2.77    0.23
   6  -4  -1    2.49    0.20
  -6  -4   1    2.53    0.17
   6  -4  -1    2.03    0.16
  -6  -4   1    2.19    0.20
   6   4  -1    2.57    0.22
  -6   4   1    2.53    0.25
  -6   4   1    2.73    0.22
  -5  -4   1    0.60    0.15
   5  -4  -1    0.35    0.10
   5  -4  -1    0.20    0.10
  -5  -4   1    0.45    0.09
  -5  -4   1    0.44    0.12
   5   4  -1    0.44    0.10
  -5   4   1    0.22    0.14
  -5   4   1    0.39    0.16
  -4  -4   1    2.90    0.23
  -4  -4   1    2.77    0.16
   4  -4  -1    2.78    0.19
  -4  -4   1    2.86    0.19
   4  -4  -1    2.22    0.17
  -4   4   1    2.86    0.22
   4   4  -1    2.72    0.18
  -4   4   1    2.79    0.23
  -3  -4   1    7.86    0.31
   3  -4  -1    7.75    0.25
  -3  -4   1    8.09    0.23
  -3  -4   1    7.75    0.28
   3  -4  -1    7.99    0.26
  -3   4   1    7.92    0.32
   3   4  -1    7.61    0.26
  -3   4   1    8.06    0.29
   2  -4  -1    7.27    0.24
   2  -4  -1    7.63    0.23
  -2  -4   1    7.42    0.20
  -2  -4   1    7.62    0.26
  -2   4   1    7.24    0.24
  -2   4   1    7.00    0.29
   2   4  -1    7.29    0.23
   1  -4  -1   80.03    1.85
  -1  -4   1   78.36    1.83
   1  -4  -1   79.60    2.01
  -1  -4   1   76.94    2.02
   1   4  -1   79.41    1.95
   1   4  -1   80.04    2.09
  -1   4   1   79.96    2.10
  -1   4   1   79.90    1.94
   0  -4  -1    3.69    0.17
   0  -4   1    4.09    0.14
   0  -4  -1    4.18    0.14
   0  -4   1    3.95    0.17
   0   4  -1    3.83    0.16
   0   4  -1    4.49    0.15
   0   4   1    4.09    0.14
   0   4   1    4.21    0.16
   1  -4   1  171.65    3.97
   1  -4   1  169.84    4.34
  -1  -4  -1  168.58    4.37
  -1  -4  -1  173.58    3.98
   1   4   1  174.45    4.53
  -1   4  -1  175.30    4.21
  -1   4  -1  170.76    4.52
  -2  -4  -1   57.50    1.31
   2  -4   1   56.27    1.34
  -2  -4  -1   57.73    1.44
   2  -4   1   55.52    1.44
  -2  -4  -1   56.67    1.46
   2   4   1   56.09    1.51
  -2   4  -1   56.37    1.54
  -2   4  -1   57.63    1.42
  -3  -4  -1    0.64    0.13
  -3  -4  -1    0.88    0.07
   3  -4   1    0.79    0.08
  -3  -4  -1    0.64    0.10
   3  -4   1    0.86    0.09
  -3   4  -1    0.86    0.12
  -3   4  -1    0.77    0.14
   3   4   1    0.86    0.09
  -4  -4  -1    0.36    0.07
   4  -4   1    0.28    0.09
   4  -4   1    0.09    0.09
  -4  -4  -1    0.28    0.10
  -4  -4  -1    0.45    0.15
   4   4   1    0.32    0.10
  -4   4  -1    0.09    0.15
  -4   4  -1    0.29    0.14
  -5  -4  -1   29.20    0.80
  -5  -4  -1   28.20    0.82
  -5  -4  -1   29.45    0.70
   5  -4   1   27.38    0.73
   5  -4   1   27.03    0.76
   5   4   1   27.73    0.82
  -5   4  -1   28.40    0.89
  -5   4  -1   28.66    0.80
  -6  -4  -1   17.98    0.56
   6  -4   1   17.59    0.52
   6  -4   1   18.14    0.51
  -6  -4  -1   17.84    0.60
   6   4   1   17.81    0.58
  -6   4  -1   18.75    0.67
  -6   4  -1   18.00    0.59
   7  -4   1    3.54    0.23
  -7  -4  -1    3.42    0.29
  -7  -4  -1    3.64    0.25
  -7   4  -1    3.41    0.28
  -7   4  -1    3.72    0.33
   7   4   1    3.50    0.27
   8  -4   1    7.03    0.31
  -8  -4  -1    7.12    0.32
  -8  -4  -1    6.61    0.41
  -8   4  -1    7.00    0.42
   8   4   1    6.27    0.36
  -8   4  -1    6.44    0.45
  -9  -4  -1    0.74    0.24
   9  -4   1    0.58    0.15
   9   4   1    0.72    0.19
  -9   4  -1    0.39    0.24
  -9   4  -1    0.70    0.28
  10  -4   1    7.24    0.34
 -10  -4  -1    7.36    0.45
  10   4   1    7.07    0.41
 -10   4  -1    6.82    0.53
 -11  -4  -1    0.29    0.27
  11   4   1   -0.02    0.21
 -11   4  -1    0.08    0.32
 -12  -4  -1    0.38    0.29
  11  -5  -1    0.94    0.20
 -11  -5   1    0.94    0.29
 -11   5   1    0.97    0.36
 -10  -5   1   15.39    0.61
  10  -5  -1   14.45    0.51
 -10   5   1   14.36    0.71
  -9  -5   1    3.22    0.31
  -9  -5   1    2.67    0.25
   9  -5  -1    2.94    0.23
   9   5  -1    2.56    0.24
  -9   5   1    2.71    0.35
   8  -5  -1    2.13    0.19
  -8  -5   1    1.79    0.25
  -8  -5   1    2.07    0.21
   8   5  -1    2.08    0.21
  -8   5   1    1.89    0.30
  -8   5   1    1.94    0.26
  -7  -5   1   -0.11    0.14
  -7  -5   1    0.00    0.18
   7  -5  -1   -0.22    0.12
  -7   5   1    0.22    0.21
  -7   5   1    0.00    0.18
   7   5  -1    0.05    0.13
  -6  -5   1    6.74    0.33
  -6  -5   1    6.92    0.25
   6  -5  -1    5.85    0.27
  -6  -5   1    6.72    0.29
   6  -5  -1    5.34    0.26
  -6   5   1    6.04    0.33
   6   5  -1    6.67    0.29
  -6   5   1    5.59    0.36
  -5  -5   1    4.09    0.17
   5  -5  -1    3.47    0.18
  -5  -5   1    3.53    0.25
  -5  -5   1    3.69    0.22
   5  -5  -1    3.33    0.20
   5   5  -1    3.48    0.20
  -5   5   1    3.31    0.29
  -5   5   1    3.36    0.25
  -4  -5   1    1.16    0.16
   4  -5  -1    1.39    0.13
  -4  -5   1    1.39    0.14
   4  -5  -1    1.18    0.11
  -4  -5   1    1.30    0.10
  -4   5   1    1.12    0.17
  -4   5   1    1.38    0.15
   4   5  -1    1.31    0.11
   3  -5  -1    2.48    0.16
   3  -5  -1    2.37    0.15
  -3  -5   1    2.78    0.21
  -3  -5   1    2.74    0.16
  -3  -5   1    2.63    0.13
   3   5  -1    2.66    0.14
  -3   5   1    2.70    0.19
  -3   5   1    2.52    0.22
  -2  -5   1   13.54    0.41
  -2  -5   1   13.31    0.34
   2  -5  -1   13.60    0.37
   2  -5  -1   13.83    0.38
  -2   5   1   13.32    0.44
  -2   5   1   13.68    0.38
   2   5  -1   14.06    0.38
   2   5  -1   13.72    0.38
   1  -5  -1  129.79    3.25
  -1  -5   1  127.53    3.26
  -1  -5   1  128.91    3.01
   1  -5  -1  128.77    2.98
  -1   5   1  132.10    3.13
   1   5  -1  125.19    3.15
   1   5  -1  128.88    3.38
  -1   5   1  128.16    3.39
   0  -5   1    0.06    0.05
   0  -5  -1    0.06    0.05
   0  -5   1    0.00    0.07
   0  -5  -1   -0.04    0.07
   0   5   1   -0.03    0.05
   0   5  -1    0.00    0.06
   0   5   1   -0.10    0.06
   0   5  -1    0.03    0.06
  -1  -5  -1    6.91    0.18
  -1  -5  -1    6.84    0.23
   1  -5   1    6.73    0.22
   1  -5   1    6.67    0.21
   1   5   1    6.91    0.23
  -1   5  -1    6.91    0.22
  -1   5  -1    6.73    0.26
   1   5   1    7.00    0.21
   2  -5   1    5.24    0.19
  -2  -5  -1    5.55    0.22
  -2  -5  -1    5.36    0.25
  -2  -5  -1    5.42    0.15
   2  -5   1    5.46    0.18
  -2   5  -1    5.13    0.21
  -2   5  -1    5.18    0.25
   2   5   1    5.50    0.19
  -3  -5  -1   38.40    1.04
  -3  -5  -1   41.00    1.04
   3  -5   1   38.68    0.95
   3  -5   1   37.65    1.00
  -3  -5  -1   39.68    0.92
  -3   5  -1   39.70    1.02
   3   5   1   38.31    1.06
  -3   5  -1   39.02    1.11
   4  -5   1   33.28    0.89
  -4  -5  -1   34.97    0.94
   4  -5   1   34.84    0.86
  -4  -5  -1   35.16    0.82
  -4  -5  -1   33.87    0.94
   4   5   1   33.66    0.95
  -4   5  -1   33.93    0.92
  -4   5  -1   33.85    1.02
  -5  -5  -1    4.24    0.22
  -5  -5  -1    4.02    0.17
   5  -5   1    3.52    0.20
  -5  -5  -1    4.21    0.28
   5  -5   1    3.47    0.17
  -5   5  -1    3.84    0.30
   5   5   1    3.95    0.22
  -5   5  -1    4.21    0.27
  -6  -5  -1    6.93    0.37
  -6  -5  -1    7.70    0.31
   6  -5   1    7.72    0.29
  -6   5  -1    7.81    0.37
   6   5   1    6.63    0.31
  -6   5  -1    7.18    0.40
  -7  -5  -1    2.85    0.23
   7  -5   1    2.74    0.21
  -7  -5  -1    2.88    0.27
   7   5   1    3.07    0.25
  -7   5  -1    2.78    0.30
  -7   5  -1    3.08    0.27
   8  -5   1    6.66    0.30
  -8  -5  -1    7.17    0.33
  -8  -5  -1    6.34    0.40
  -8   5  -1    6.68    0.41
   8   5   1    6.28    0.35
  -8   5  -1    6.31    0.46
  -9  -5  -1    1.24    0.26
  -9  -5  -1    1.07    0.20
   9  -5   1    1.22    0.18
   9   5   1    1.22    0.20
  -9   5  -1    1.02    0.30
  10  -5   1    1.77    0.20
 -10  -5  -1    1.61    0.28
  10   5   1    1.51    0.24
 -10   5  -1    0.98    0.34
 -11  -5  -1    2.48    0.33
 -11   5  -1    2.61    0.42
  11  -6  -1    1.21    0.21
 -11   6   1    1.54    0.38
 -10  -6   1   12.25    0.56
  10  -6  -1   12.58    0.46
 -10   6   1   12.12    0.66
  -9  -6   1    0.16    0.22
   9  -6  -1   -0.06    0.15
  -9  -6   1   -0.10    0.17
  -9   6   1    0.27    0.27
   9   6  -1    0.05    0.16
  -8  -6   1    0.05    0.20
  -8  -6   1   -0.18    0.15
   8  -6  -1    0.10    0.14
   8   6  -1    0.07    0.14
  -8   6   1   -0.15    0.23
  -7  -6   1    0.74    0.17
   7  -6  -1    0.75    0.15
  -7  -6   1    0.93    0.21
   7   6  -1    0.88    0.15
  -7   6   1    0.62    0.23
  -7   6   1    0.92    0.20
   6  -6  -1    6.97    0.28
  -6  -6   1    7.29    0.36
  -6  -6   1    6.97    0.31
  -6  -6   1    7.60    0.26
   6  -6  -1    6.93    0.29
  -6   6   1    7.41    0.35
   6   6  -1    7.15    0.30
  -6   6   1    6.46    0.40
   5  -6  -1   15.28    0.47
   5  -6  -1   15.67    0.46
  -5  -6   1   16.31    0.43
  -5  -6   1   16.06    0.51
  -5  -6   1   16.30    0.53
   5   6  -1   16.37    0.49
  -5   6   1   15.91    0.58
  -5   6   1   15.90    0.50
   4  -6  -1    3.75    0.18
   4  -6  -1    3.66    0.20
  -4  -6   1    4.11    0.16
  -4  -6   1    4.17    0.22
  -4  -6   1    3.80    0.25
  -4   6   1    3.80    0.28
   4   6  -1    3.91    0.18
  -4   6   1    3.79    0.24
   3  -6  -1    1.78    0.15
   3  -6  -1    1.48    0.12
  -3  -6   1    1.59    0.11
  -3  -6   1    1.53    0.13
   3   6  -1    1.37    0.12
  -3   6   1    1.26    0.13
  -3   6   1    1.14    0.16
   3   6  -1    1.73    0.13
  -2  -6   1    9.37    0.24
   2  -6  -1    9.05    0.28
   2  -6  -1    8.86    0.28
  -2  -6   1    9.30    0.31
   2   6  -1    9.51    0.27
   2   6  -1    9.26    0.29
  -2   6   1    9.20    0.28
  -2   6   1    8.74    0.34
   1  -6  -1   13.55    0.38
  -1  -6   1   12.73    0.39
   1  -6  -1   13.68    0.35
  -1  -6   1   13.04    0.33
   1   6  -1   13.22    0.37
  -1   6   1   12.82    0.40
   1   6  -1   12.50    0.36
  -1   6   1   13.87    0.35
   0  -6   1    0.38    0.05
   0  -6  -1    0.29    0.08
   0  -6  -1    0.43    0.06
   0  -6   1    0.30    0.08
   0   6   1    0.41    0.07
   0   6   1    0.36    0.06
   0   6  -1    0.27    0.07
   0   6  -1    0.31    0.06
   1  -6   1   28.79    0.74
  -1  -6  -1   27.95    0.76
   1  -6   1   28.10    0.69
  -1  -6  -1   28.45    0.66
  -1   6  -1   29.11    0.72
   1   6   1   27.68    0.72
   1   6   1   28.04    0.76
  -1   6  -1   28.29    0.79
  -2  -6  -1    1.88    0.08
  -2  -6  -1    1.65    0.13
   2  -6   1    1.66    0.11
   2  -6   1    1.71    0.13
   2   6   1    1.91    0.11
  -2   6  -1    2.05    0.15
  -2   6  -1    1.61    0.15
  -3  -6  -1    0.45    0.13
   3  -6   1    0.44    0.08
   3  -6   1    0.34    0.09
  -3  -6  -1    0.64    0.11
  -3  -6  -1    0.56    0.06
   3   6   1    0.72    0.09
  -3   6  -1    0.34    0.14
  -3   6  -1    0.52    0.12
  -4  -6  -1    1.53    0.12
   4  -6   1    1.34    0.12
   4  -6   1    1.44    0.12
  -4  -6  -1    1.81    0.15
  -4  -6  -1    1.53    0.17
   4   6   1    1.95    0.15
  -4   6  -1    1.59    0.19
  -4   6  -1    1.61    0.16
   5  -6   1   52.56    1.29
  -5  -6  -1   53.40    1.25
  -5  -6  -1   52.48    1.41
   5  -6   1   52.01    1.36
  -5  -6  -1   53.81    1.40
  -5   6  -1   53.37    1.38
   5   6   1   53.55    1.45
  -5   6  -1   49.94    1.51
  -6  -6  -1    7.08    0.35
  -6  -6  -1    6.82    0.30
   6  -6   1    6.48    0.28
   6   6   1    7.03    0.30
  -6   6  -1    7.33    0.36
  -6   6  -1    6.73    0.41
  -7  -6  -1    9.22    0.38
   7  -6   1    9.58    0.35
  -7  -6  -1    9.60    0.44
  -7   6  -1    9.83    0.49
   7   6   1    9.64    0.39
  -7   6  -1    9.99    0.44
   8  -6   1    7.25    0.32
  -8  -6  -1    6.72    0.40
  -8  -6  -1    7.13    0.34
  -8   6  -1    7.16    0.41
   8   6   1    7.43    0.35
  -8   6  -1    6.98    0.48
  -9  -6  -1    2.32    0.24
   9  -6   1    2.57    0.22
  -9  -6  -1    2.83    0.30
   9   6   1    2.48    0.24
  -9   6  -1    2.50    0.35
 -10  -6  -1    4.10    0.36
  10  -6   1    4.08    0.28
  10   6   1    4.06    0.33
 -10   6  -1    4.58    0.45
 -11  -6  -1    9.52    0.54
  11  -6   1   10.30    0.42
 -11   6  -1   11.25    0.67
  11  -7  -1    0.77    0.20
 -11   7   1    0.62    0.35
  10  -7  -1    1.53    0.21
 -10   7   1    1.41    0.35
   9  -7  -1    1.49    0.19
  -9  -7   1    1.45    0.26
  -9  -7   1    1.61    0.22
  -9   7   1    1.47    0.32
  -8  -7   1    0.00    0.16
   8  -7  -1   -0.02    0.14
  -8  -7   1   -0.07    0.20
  -8   7   1    0.29    0.25
   8   7  -1    0.17    0.14
  -7  -7   1   -0.03    0.15
  -7  -7   1    0.22    0.19
   7  -7  -1    0.09    0.13
   7   7  -1    0.04    0.12
  -7   7   1    0.00    0.22
  -7   7   1    0.05    0.19
   6  -7  -1    3.62    0.22
  -6  -7   1    3.30    0.24
  -6  -7   1    3.17    0.25
  -6   7   1    3.40    0.29
  -6   7   1    3.28    0.29
   6   7  -1    3.48    0.21
  -5  -7   1    0.39    0.15
  -5  -7   1    0.28    0.08
   5  -7  -1    0.33    0.10
  -5  -7   1    0.28    0.13
   5  -7  -1    0.35    0.11
  -5   7   1    0.27    0.16
  -5   7   1    0.37    0.14
   5   7  -1    0.28    0.09
   4  -7  -1    9.88    0.33
  -4  -7   1   10.06    0.36
  -4  -7   1   10.78    0.29
   4  -7  -1   10.54    0.33
  -4   7   1    9.73    0.40
  -4   7   1   10.51    0.35
   4   7  -1    9.98    0.33
  -3  -7   1    4.05    0.15
   3  -7  -1    4.12    0.20
   3  -7  -1    4.40    0.19
  -3  -7   1    3.96    0.20
  -3   7   1    4.40    0.26
   3   7  -1    3.96    0.17
  -3   7   1    4.66    0.22
   3   7  -1    4.12    0.20
   2  -7  -1    0.03    0.08
  -2  -7   1    0.18    0.04
  -2  -7   1    0.20    0.10
   2  -7  -1    0.22    0.09
   2   7  -1    0.09    0.08
   2   7  -1    0.25    0.05
  -2   7   1    0.16    0.08
  -2   7   1    0.20    0.11
   1  -7  -1    1.58    0.12
  -1  -7   1    1.39    0.08
  -1  -7   1    1.25    0.12
   1  -7  -1    1.61    0.14
   1   7  -1    1.34    0.10
  -1   7   1    1.68    0.11
  -1   7   1    1.44    0.12
   1   7  -1    1.36    0.11
   0  -7   1   13.13    0.34
   0  -7   1   12.56    0.38
   0  -7  -1   12.68    0.39
   0  -7  -1   12.96    0.34
   0   7   1   13.10    0.35
   0   7  -1   13.32    0.39
   0   7   1   13.36    0.39
   0   7  -1   13.77    0.36
   1  -7   1   29.79    0.73
  -1  -7  -1   30.40    0.81
  -1  -7  -1   29.89    0.71
   1  -7   1   30.36    0.79
   1   7   1   29.31    0.77
   1   7   1   30.26    0.81
  -1   7  -1   30.13    0.84
  -1   7  -1   30.81    0.77
  -2  -7  -1    9.25    0.23
   2  -7   1    9.67    0.28
  -2  -7  -1    9.38    0.32
   2  -7   1    9.22    0.28
   2   7   1    9.58    0.28
  -2   7  -1    8.96    0.35
   2   7   1    9.06    0.30
  -2   7  -1    9.07    0.30
  -3  -7  -1    5.37    0.25
  -3  -7  -1    5.66    0.17
  -3  -7  -1    5.63    0.28
   3  -7   1    6.28    0.23
   3  -7   1    5.87    0.20
  -3   7  -1    5.79    0.30
  -3   7  -1    5.83    0.25
   3   7   1    5.82    0.22
   4  -7   1   30.74    0.79
  -4  -7  -1   31.06    0.87
   4  -7   1   30.97    0.82
  -4  -7  -1   32.38    0.75
  -4  -7  -1   30.57    0.87
   4   7   1   31.81    0.87
  -4   7  -1   30.42    0.94
  -4   7  -1   30.91    0.85
  -5  -7  -1   33.67    0.94
   5  -7   1   32.05    0.84
  -5  -7  -1   33.66    0.93
   5  -7   1   31.00    0.87
  -5  -7  -1   34.72    0.80
  -5   7  -1   30.98    1.01
   5   7   1   33.08    0.93
  -5   7  -1   34.26    0.92
  -6  -7  -1    7.32    0.32
  -6  -7  -1    7.48    0.37
   6  -7   1    6.45    0.28
  -6   7  -1    7.01    0.35
  -6   7  -1    7.11    0.40
   6   7   1    7.43    0.30
   7  -7   1    7.03    0.30
  -7  -7  -1    7.23    0.33
  -7  -7  -1    6.68    0.38
  -7   7  -1    7.16    0.40
   7   7   1    6.75    0.32
  -7   7  -1    7.34    0.44
  -8  -7  -1    3.26    0.27
  -8  -7  -1    3.14    0.30
   8  -7   1    3.17    0.24
  -8   7  -1    3.05    0.35
   8   7   1    3.28    0.26
  -9  -7  -1    0.18    0.18
   9  -7   1    0.12    0.15
  -9  -7  -1   -0.18    0.21
   9   7   1   -0.27    0.15
  -9   7  -1   -0.07    0.27
 -10  -7  -1    8.10    0.47
  10  -7   1    7.69    0.35
 -10   7  -1    7.18    0.54
  11  -7   1    1.90    0.23
 -11  -7  -1    1.59    0.32
 -11   7  -1    1.75    0.40
  11  -8  -1    0.96    0.21
 -11   8   1    0.56    0.35
  11   8  -1    1.11    0.23
  10  -8  -1    0.55    0.18
 -10  -8   1    0.38    0.21
  10   8  -1    0.61    0.20
 -10   8   1    0.11    0.30
  -9  -8   1    1.63    0.23
   9  -8  -1    1.49    0.20
  -9   8   1    1.03    0.31
   8  -8  -1    0.14    0.15
  -8  -8   1    0.05    0.18
  -8   8   1    0.28    0.25
   8   8  -1    0.19    0.13
  -7  -8   1    0.11    0.16
   7  -8  -1    0.20    0.14
   7   8  -1    0.18    0.12
  -7   8   1   -0.19    0.22
  -6  -8   1   13.18    0.47
   6  -8  -1   13.28    0.43
  -6   8   1   13.33    0.47
  -6   8   1   12.85    0.55
   6   8  -1   13.25    0.44
  -5  -8   1   59.87    1.64
  -5  -8   1   63.00    1.45
   5  -8  -1   60.77    1.50
   5  -8  -1   61.69    1.59
  -5   8   1   62.10    1.58
  -5   8   1   60.38    1.74
   5   8  -1   60.30    1.65
  -4  -8   1   13.25    0.44
  -4  -8   1   13.89    0.36
   4  -8  -1   13.12    0.40
   4  -8  -1   13.44    0.40
   4   8  -1   13.37    0.42
  -4   8   1   13.41    0.42
   4   8  -1   13.52    0.40
  -4   8   1   12.25    0.49
  -3  -8   1    0.26    0.11
   3  -8  -1    0.47    0.10
   3  -8  -1    0.17    0.09
  -3  -8   1    0.17    0.06
   3   8  -1    0.16    0.09
  -3   8   1    0.00    0.13
  -3   8   1    0.20    0.11
   3   8  -1    0.27    0.06
  -2  -8   1    9.03    0.31
  -2  -8   1    9.38    0.24
   2  -8  -1    8.81    0.29
   2  -8  -1    8.72    0.28
  -2   8   1    8.71    0.35
   2   8  -1    9.60    0.27
   2   8  -1    9.38    0.29
  -2   8   1    9.25    0.29
   1  -8  -1    3.57    0.18
  -1  -8   1    3.79    0.19
  -1  -8   1    3.61    0.13
   1  -8  -1    3.63    0.16
  -1   8   1    3.60    0.15
   1   8  -1    3.82    0.16
  -1   8   1    3.47    0.20
   1   8  -1    3.83    0.15
   0  -8  -1    1.41    0.12
   0  -8   1    1.58    0.12
   0  -8  -1    1.56    0.11
   0  -8   1    1.56    0.11
   0   8   1    1.33    0.13
   0   8  -1    1.46    0.11
   0   8  -1    1.39    0.13
   0   8   1    1.37    0.11
   1  -8   1   26.19    0.63
  -1  -8  -1   25.21    0.71
  -1  -8  -1   24.92    0.61
   1  -8   1   25.93    0.69
   1   8   1   25.08    0.70
   1   8   1   25.11    0.67
  -1   8  -1   26.71    0.66
  -1   8  -1   25.54    0.73
   2  -8   1   39.84    0.95
  -2  -8  -1   39.04    1.05
  -2  -8  -1   39.39    0.91
   2  -8   1   38.18    1.01
  -2   8  -1   38.89    1.00
   2   8   1   38.62    1.00
  -2   8  -1   38.20    1.10
   2   8   1   39.36    1.04
   3  -8   1    1.45    0.13
  -3  -8  -1    1.50    0.15
  -3  -8  -1    1.69    0.10
   3  -8   1    1.31    0.12
   3   8   1    1.76    0.13
  -3   8  -1    1.45    0.17
   3   8   1    1.45    0.13
  -3   8  -1    1.91    0.15
   4  -8   1    0.27    0.08
  -4  -8  -1    0.30    0.14
  -4  -8  -1    0.20    0.06
  -4  -8  -1    0.11    0.12
   4  -8   1    0.21    0.09
   4   8   1    0.04    0.08
  -4   8  -1    0.23    0.13
  -4   8  -1    0.18    0.15
  -5  -8  -1    0.48    0.17
  -5  -8  -1    0.62    0.14
   5  -8   1    0.61    0.12
  -5   8  -1    0.75    0.16
   5   8   1    0.56    0.10
  -5   8  -1    0.58    0.18
   6  -8   1    1.18    0.15
  -6  -8  -1    2.02    0.23
  -6  -8  -1    1.77    0.19
  -6   8  -1    1.85    0.25
  -6   8  -1    1.47    0.20
   6   8   1    1.54    0.15
  -7  -8  -1    6.91    0.40
  -7  -8  -1    8.13    0.36
   7  -8   1    7.73    0.32
  -7   8  -1    7.18    0.46
  -7   8  -1    7.74    0.41
   7   8   1    8.32    0.34
  -8  -8  -1    2.89    0.26
  -8  -8  -1    3.66    0.31
   8  -8   1    2.80    0.23
  -8   8  -1    2.98    0.35
   8   8   1    3.22    0.25
  -9  -8  -1    0.69    0.21
  -9  -8  -1    0.70    0.24
   9  -8   1    0.73    0.17
  -9   8  -1    0.50    0.30
   9   8   1    0.91    0.18
  10  -8   1    5.12    0.30
 -10  -8  -1    4.69    0.41
 -10   8  -1    4.91    0.48
  11  -8   1    1.60    0.23
 -11   8  -1    1.91    0.40
  11  -9  -1    1.42    0.23
 -11   9   1    1.82    0.40
  11   9  -1    1.91    0.26
  10  -9  -1    1.41    0.21
 -10  -9   1    0.75    0.24
  10   9  -1    1.15    0.22
 -10   9   1    1.53    0.36
  -9  -9   1    6.67    0.37
   9  -9  -1    6.42    0.34
  -9   9   1    5.81    0.49
   9   9  -1    6.52    0.36
   8  -9  -1    5.48    0.30
  -8  -9   1    5.56    0.33
   8   9  -1    5.12    0.32
  -8   9   1    4.86    0.42
   7  -9  -1    7.05    0.31
  -7  -9   1    6.97    0.34
   7   9  -1    7.15    0.34
   7   9  -1    6.78    0.30
  -7   9   1    6.24    0.44
  -6  -9   1    0.64    0.15
   6  -9  -1    0.54    0.14
  -6   9   1    0.54    0.22
  -6   9   1    0.68    0.18
   6   9  -1    0.78    0.12
   6   9  -1    0.67    0.15
  -5  -9   1   18.08    0.58
   5  -9  -1   18.44    0.53
   5  -9  -1   17.72    0.53
   5   9  -1   18.00    0.56
  -5   9   1   17.21    0.64
   5   9  -1   19.13    0.54
  -5   9   1   18.87    0.56
   4  -9  -1    4.43    0.20
  -4  -9   1    4.30    0.24
   4  -9  -1    4.44    0.22
  -4  -9   1    4.60    0.17
  -4   9   1    4.81    0.30
   4   9  -1    4.55    0.23
   4   9  -1    4.55    0.19
  -4   9   1    4.68    0.25
  -3  -9   1   21.86    0.64
   3  -9  -1   21.59    0.60
  -3  -9   1   21.95    0.53
   3  -9  -1   21.64    0.58
   3   9  -1   22.49    0.60
  -3   9   1   21.12    0.68
   3   9  -1   21.53    0.60
  -3   9   1   21.39    0.60
  -2  -9   1   -0.02    0.05
  -2  -9   1   -0.13    0.10
   2  -9  -1   -0.04    0.09
   2  -9  -1    0.05    0.08
  -2   9   1    0.05    0.08
  -2   9   1   -0.04    0.12
   2   9  -1   -0.02    0.08
   2   9  -1    0.14    0.06
  -1  -9   1    0.34    0.10
   1  -9  -1    0.46    0.08
  -1  -9   1    0.33    0.05
   1  -9  -1    0.39    0.10
   1   9  -1    0.32    0.07
   1   9  -1    0.33    0.08
  -1   9   1    0.35    0.11
  -1   9   1    0.46    0.08
   0  -9   1    1.08    0.12
   0  -9  -1    1.00    0.08
   0  -9  -1    1.09    0.12
   0  -9   1    1.17    0.08
   0   9  -1    1.08    0.11
   0   9   1    1.20    0.09
   0   9  -1    1.11    0.09
   0   9   1    0.94    0.10
  -1  -9  -1    6.31    0.26
  -1  -9  -1    6.43    0.19
   1  -9   1    6.61    0.22
   1  -9   1    6.70    0.24
  -1   9  -1    6.59    0.27
   1   9   1    6.63    0.23
   1   9   1    6.79    0.23
  -1   9  -1    6.93    0.23
   2  -9   1    0.60    0.10
   2  -9   1    0.53    0.10
  -2  -9  -1    0.53    0.12
  -2  -9  -1    0.58    0.05
  -2   9  -1    0.51    0.10
  -2   9  -1    0.40    0.13
   2   9   1    0.56    0.07
   2   9   1    0.52    0.10
  -3  -9  -1   63.71    1.68
  -3  -9  -1   65.14    1.48
   3  -9   1   61.76    1.53
   3  -9   1   63.43    1.63
   3   9   1   65.28    1.70
  -3   9  -1   63.01    1.61
   3   9   1   64.96    1.62
  -3   9  -1   62.07    1.76
  -4  -9  -1    4.42    0.15
   4  -9   1    4.11    0.17
  -4  -9  -1    4.03    0.23
   4  -9   1    3.55    0.20
   4   9   1    4.30    0.23
   4   9   1    4.11    0.18
  -4   9  -1    3.54    0.28
  -4   9  -1    3.96    0.25
  -5  -9  -1    2.99    0.23
   5  -9   1    3.27    0.20
  -5   9  -1    3.00    0.27
   5   9   1    3.33    0.19
  -5   9  -1    2.95    0.26
  -6  -9  -1    2.66    0.23
   6  -9   1    2.55    0.20
  -6  -9  -1    2.40    0.25
  -6   9  -1    2.86    0.29
   6   9   1    2.79    0.20
  -6   9  -1    2.49    0.24
   7  -9   1    7.58    0.32
  -7  -9  -1    7.27    0.36
  -7  -9  -1    7.81    0.41
   7   9   1    8.14    0.33
  -7   9  -1    7.25    0.45
  -8  -9  -1    1.80    0.27
   8  -9   1    1.36    0.18
  -8  -9  -1    1.81    0.23
   8   9   1    1.46    0.18
  -8   9  -1    1.87    0.32
   9  -9   1    1.74    0.20
  -9  -9  -1    1.42    0.23
  -9   9  -1    1.85    0.35
  10  -9   1    1.31    0.20
 -10   9  -1    0.78    0.35
  11  -9   1    0.40    0.19
  11   9   1    0.03    0.22
  11 -10  -1    0.98    0.22
  11  10  -1    0.86    0.23
 -10 -10   1    5.85    0.37
  10 -10  -1    5.43    0.33
  10  10  -1    6.03    0.36
 -10  10   1    5.03    0.49
   9 -10  -1    1.61    0.20
  -9 -10   1    1.68    0.24
  -9  10   1    2.03    0.35
   9  10  -1    1.31    0.22
  -8 -10   1    6.41    0.35
   8 -10  -1    6.29    0.32
   8  10  -1    5.94    0.33
  -8  10   1    5.34    0.45
  -7 -10   1    0.20    0.18
   7 -10  -1    0.18    0.14
   7  10  -1   -0.18    0.15
   7  10  -1    0.07    0.11
  -7  10   1   -0.02    0.23
   6 -10  -1    2.20    0.19
  -6 -10   1    2.03    0.22
   6  10  -1    2.13    0.18
  -6  10   1    2.03    0.27
   6  10  -1    2.22    0.20
   5 -10  -1    3.62    0.22
  -5 -10   1    3.79    0.25
  -5  10   1    3.70    0.32
   5  10  -1    3.63    0.19
   5  10  -1    4.04    0.24
  -5  10   1    3.92    0.26
   4 -10  -1    0.23    0.11
  -4 -10   1    0.48    0.14
  -4 -10   1    0.47    0.07
   4 -10  -1    0.38    0.11
  -4  10   1    0.25    0.16
  -4  10   1    0.30    0.13
   4  10  -1    0.42    0.12
   4  10  -1    0.49    0.08
   3 -10  -1   21.87    0.61
   3 -10  -1   21.22    0.58
  -3 -10   1   21.18    0.54
  -3 -10   1   22.28    0.65
  -3  10   1   21.41    0.69
   3  10  -1   22.55    0.61
   3  10  -1   22.10    0.61
  -3  10   1   22.45    0.60
  -2 -10   1    4.88    0.24
   2 -10  -1    4.48    0.19
   2 -10  -1    4.28    0.19
  -2 -10   1    4.78    0.15
  -2  10   1    4.48    0.20
  -2  10   1    4.61    0.26
   2  10  -1    4.99    0.18
   2  10  -1    4.61    0.20
   1 -10  -1   45.57    1.24
  -1 -10   1   47.81    1.11
  -1 -10   1   45.32    1.25
   1 -10  -1   46.15    1.13
   1  10  -1   48.77    1.27
  -1  10   1   48.63    1.18
   1  10  -1   46.56    1.19
  -1  10   1   47.12    1.29
   0 -10   1    8.53    0.25
   0 -10  -1    8.11    0.24
   0 -10   1    8.57    0.29
   0 -10  -1    7.75    0.29
   0  10   1    7.73    0.29
   0  10   1    8.08    0.26
   0  10  -1    8.62    0.29
   0  10  -1    8.72    0.26
   1 -10   1   15.64    0.47
  -1 -10  -1   15.91    0.49
   1 -10   1   16.56    0.43
  -1 -10  -1   16.50    0.41
  -1  10  -1   16.74    0.46
  -1  10  -1   16.73    0.51
   1  10   1   16.67    0.46
   1  10   1   16.22    0.48
  -2 -10  -1   29.51    0.69
  -2 -10  -1   29.22    0.82
   2 -10   1   28.84    0.73
   2 -10   1   29.31    0.79
  -2  10  -1   29.01    0.86
   2  10   1   27.85    0.77
   2  10   1   29.66    0.80
  -2  10  -1   29.46    0.77
  -3 -10  -1   59.16    1.40
   3 -10   1   61.40    1.54
  -3 -10  -1   60.13    1.59
   3 -10   1   59.13    1.45
  -3  10  -1   60.21    1.67
   3  10   1   61.00    1.60
   3  10   1   58.91    1.53
  -3  10  -1   59.27    1.52
   4 -10   1    2.43    0.18
   4 -10   1    2.88    0.16
  -4 -10  -1    2.65    0.22
   4  10   1    2.88    0.21
   4  10   1    2.57    0.16
  -4  10  -1    2.91    0.26
  -4  10  -1    2.90    0.23
  -5 -10  -1    7.44    0.31
   5 -10   1    6.76    0.28
   5  10   1    7.08    0.27
   5  10   1    6.95    0.31
  -5  10  -1    6.98    0.40
  -5  10  -1    7.00    0.33
   6 -10   1    0.66    0.14
  -6 -10  -1    0.99    0.18
  -6  10  -1    0.87    0.20
  -6  10  -1    0.97    0.24
   6  10   1    0.92    0.13
  -7 -10  -1   10.15    0.42
   7 -10   1   10.02    0.37
   7  10   1   10.06    0.38
  -7  10  -1    9.29    0.52
   8 -10   1    0.50    0.16
  -8 -10  -1    1.03    0.21
  -8  10  -1    0.86    0.29
   8  10   1    0.80    0.16
  -9 -10  -1    0.04    0.20
   9 -10   1   -0.14    0.15
  -9  10  -1   -0.10    0.28
 -10 -10  -1    0.62    0.22
  10 -10   1    0.46    0.18
  10  10   1    0.38    0.21
 -10  10  -1    0.39    0.33
  11 -10   1    0.91    0.21
 -10 -11   1    3.37    0.33
  10 -11  -1    3.16    0.27
  10  11  -1    3.38    0.29
 -10  11   1    3.02    0.43
   9 -11  -1    1.22    0.20
  -9 -11   1    1.26    0.24
   9  11  -1    1.53    0.22
  -9  11   1    1.11    0.33
   8 -11  -1    4.71    0.29
  -8 -11   1    4.70    0.32
  -8  11   1    4.40    0.41
   8  11  -1    4.80    0.30
   7 -11  -1    2.10    0.20
  -7 -11   1    2.50    0.25
  -7  11   1    1.83    0.30
   7  11  -1    2.32    0.22
  -6 -11   1    7.14    0.35
   6 -11  -1    6.55    0.30
   6  11  -1    7.36    0.29
  -6  11   1    6.45    0.43
   6  11  -1    7.41    0.32
  -5 -11   1    8.90    0.37
   5 -11  -1    9.07    0.34
  -5  11   1    8.44    0.36
   5  11  -1    8.65    0.34
  -5  11   1    8.41    0.44
   5  11  -1    9.24    0.30
  -4 -11   1    1.45    0.17
   4 -11  -1    1.91    0.16
   4 -11  -1    1.67    0.15
  -4  11   1    1.52    0.16
   4  11  -1    1.59    0.15
   4  11  -1    1.28    0.10
  -4  11   1    1.97    0.22
   3 -11  -1    3.10    0.18
   3 -11  -1    3.43    0.19
  -3 -11   1    2.92    0.13
  -3 -11   1    3.30    0.22
   3  11  -1    2.98    0.14
  -3  11   1    2.99    0.19
   3  11  -1    2.91    0.19
  -3  11   1    3.48    0.26
  -2 -11   1   15.75    0.39
   2 -11  -1   15.73    0.43
   2 -11  -1   15.44    0.46
  -2 -11   1   15.37    0.49
  -2  11   1   15.28    0.52
  -2  11   1   15.68    0.45
   2  11  -1   15.92    0.45
   2  11  -1   15.36    0.45
  -1 -11   1   17.33    0.43
   1 -11  -1   17.23    0.46
   1 -11  -1   17.34    0.51
  -1 -11   1   16.80    0.52
  -1  11   1   17.47    0.47
  -1  11   1   16.54    0.53
   1  11  -1   17.13    0.48
   1  11  -1   17.05    0.50
   0 -11   1    0.50    0.11
   0 -11   1    0.22    0.07
   0 -11  -1    0.36    0.11
   0 -11  -1    0.48    0.07
   0  11   1    0.35    0.10
   0  11  -1    0.38    0.10
   0  11   1    0.50    0.08
   0  11  -1    0.40    0.08
  -1 -11  -1    9.81    0.26
   1 -11   1    9.14    0.28
   1 -11   1    8.69    0.31
  -1 -11  -1    9.12    0.34
  -1  11  -1    8.70    0.34
  -1  11  -1    9.60    0.30
   1  11   1    9.56    0.30
   1  11   1    9.94    0.30
  -2 -11  -1    7.95    0.21
   2 -11   1    7.53    0.26
   2 -11   1    7.24    0.27
  -2 -11  -1    7.70    0.31
  -2  11  -1    7.79    0.27
   2  11   1    7.62    0.27
   2  11   1    7.92    0.25
  -2  11  -1    7.24    0.33
   3 -11   1   47.20    1.25
   3 -11   1   46.68    1.17
  -3 -11  -1   47.38    1.30
  -3 -11  -1   46.92    1.12
   3  11   1   47.57    1.24
   3  11   1   49.62    1.29
  -3  11  -1   48.66    1.37
  -3  11  -1   48.59    1.23
  -4 -11  -1    0.63    0.15
   4 -11   1    0.39    0.11
   4 -11   1    0.42    0.10
  -4  11  -1    0.50    0.18
  -4  11  -1    0.62    0.15
   4  11   1    0.43    0.09
   4  11   1    0.43    0.12
  -5 -11  -1    8.81    0.37
   5 -11   1    7.71    0.31
   5  11   1    8.99    0.31
  -5  11  -1    8.84    0.37
   5  11   1    8.95    0.35
  -5  11  -1    8.17    0.42
   6 -11   1   15.43    0.48
  -6 -11  -1   15.59    0.54
  -6  11  -1   15.32    0.64
   6  11   1   15.79    0.52
   6  11   1   15.19    0.49
   7 -11   1    3.26    0.24
  -7 -11  -1    3.19    0.28
   7  11   1    3.80    0.28
   7  11   1    3.31    0.23
  -7  11  -1    3.25    0.35
  -8 -11  -1    0.58    0.20
   8 -11   1    0.55    0.16
  -8  11  -1    0.48    0.28
   8  11   1    0.56    0.19
  -9 -11  -1    2.16    0.26
   9 -11   1    1.68    0.21
  -9  11  -1    2.21    0.37
   9  11   1    1.69    0.24
 -10 -11  -1    0.21    0.23
  10 -11   1    0.05    0.18
  10  11   1    0.13    0.20
 -10  11  -1    0.04    0.34
  10 -12  -1    1.75    0.23
 -10 -12   1    1.45    0.27
 -10  12   1    1.32    0.38
  10  12  -1    1.44    0.24
   9 -12  -1    0.10    0.17
  -9 -12   1    0.69    0.23
  -9  12   1    0.27    0.30
   9  12  -1    0.28    0.18
  -8 -12   1    1.47    0.23
   8 -12  -1    1.09    0.19
   8  12  -1    1.66    0.21
  -8  12   1    1.27    0.31
   7 -12  -1    3.20    0.24
  -7 -12   1    2.94    0.28
  -7  12   1    3.25    0.35
   7  12  -1    3.12    0.25
  -6 -12   1    4.10    0.28
   6 -12  -1    3.60    0.24
  -6  12   1    3.92    0.37
   6  12  -1    3.88    0.26
   5 -12  -1    8.16    0.31
  -5 -12   1    7.66    0.34
  -5  12   1    7.41    0.42
   5  12  -1    8.13    0.28
   5  12  -1    7.89    0.32
   4 -12  -1    3.54    0.21
  -4 -12   1    3.27    0.23
   4 -12  -1    3.71    0.20
  -4  12   1    3.56    0.29
   4  12  -1    3.36    0.16
   4  12  -1    3.14    0.22
  -4  12   1    3.55    0.24
   3 -12  -1    2.89    0.19
   3 -12  -1    3.46    0.19
  -3 -12   1    2.66    0.22
  -3 -12   1    2.98    0.13
  -3  12   1    3.23    0.21
   3  12  -1    2.86    0.19
   3  12  -1    3.13    0.16
  -3  12   1    3.32    0.27
   2 -12  -1    1.79    0.13
   2 -12  -1    2.12    0.17
  -2 -12   1    1.87    0.17
  -2 -12   1    1.89    0.11
   2  12  -1    2.11    0.14
   2  12  -1    1.93    0.16
  -2  12   1    2.18    0.19
  -2  12   1    2.07    0.17
  -1 -12   1    4.32    0.15
   1 -12  -1    3.88    0.20
  -1 -12   1    4.25    0.22
   1 -12  -1    4.36    0.18
  -1  12   1    3.80    0.23
   1  12  -1    4.22    0.19
   1  12  -1    4.54    0.20
  -1  12   1    4.00    0.19
   0 -12   1    2.70    0.19
   0 -12  -1    2.79    0.14
   0 -12  -1    2.83    0.19
   0 -12   1    2.68    0.14
   0  12  -1    2.82    0.16
   0  12   1    2.99    0.15
   0  12   1    2.68    0.18
   0  12  -1    3.04    0.19
  -1 -12  -1    0.15    0.11
   1 -12   1    0.06    0.10
  -1 -12  -1    0.05    0.05
   1 -12   1    0.05    0.07
   1  12   1    0.07    0.08
   1  12   1    0.05    0.08
  -1  12  -1   -0.01    0.11
  -1  12  -1    0.02    0.09
   2 -12   1    0.29    0.10
   2 -12   1    0.37    0.09
  -2 -12  -1    0.24    0.12
  -2 -12  -1    0.19    0.05
  -2  12  -1    0.23    0.13
  -2  12  -1    0.17    0.11
   2  12   1    0.15    0.09
   2  12   1    0.35    0.08
   3 -12   1    0.34    0.10
  -3 -12  -1    0.20    0.13
   3 -12   1    0.33    0.10
   3  12   1    0.16    0.11
  -3  12  -1    0.38    0.16
   3  12   1    0.39    0.08
  -3  12  -1    0.22    0.13
   4 -12   1   21.80    0.60
  -4 -12  -1   21.78    0.68
   4  12   1   22.00    0.63
  -4  12  -1   21.88    0.64
   4  12   1   21.99    0.62
  -4  12  -1   21.36    0.73
  -5 -12  -1    5.32    0.30
   5 -12   1    5.29    0.26
   5  12   1    4.64    0.27
  -5  12  -1    4.96    0.31
   5  12   1    5.06    0.23
  -5  12  -1    5.20    0.36
   6 -12   1   11.21    0.39
  -6 -12  -1   10.44    0.44
   6  12   1   10.44    0.41
   6  12   1   11.50    0.38
  -6  12  -1   11.18    0.54
  -7 -12  -1    0.36    0.19
   7 -12   1    0.33    0.15
   7  12   1    0.38    0.17
  -7  12  -1    0.44    0.26
  -8 -12  -1   17.14    0.61
   8 -12   1   16.67    0.53
  -8  12  -1   15.15    0.71
   8  12   1   15.77    0.57
  -9 -12  -1    5.59    0.36
   9 -12   1    5.94    0.33
   9  12   1    5.18    0.34
  -9  12  -1    4.73    0.46
 -10 -12  -1    0.84    0.25
  10 -12   1    1.33    0.22
 -10  12  -1    0.59    0.37
  10  12   1    1.02    0.23
 -10 -13   1    0.19    0.23
  10 -13  -1    0.59    0.20
  10  13  -1    0.16    0.20
 -10  13   1    0.19    0.34
   9 -13  -1    0.73    0.19
  -9 -13   1    1.04    0.25
   9  13  -1    0.57    0.20
  -9  13   1    0.96    0.34
  -8 -13   1    2.06    0.26
   8 -13  -1    1.88    0.21
  -8  13   1    1.87    0.34
   8  13  -1    2.08    0.23
  -7 -13   1    1.51    0.23
   7 -13  -1    1.18    0.18
   7  13  -1    1.07    0.18
  -7  13   1    1.46    0.30
   6 -13  -1    5.82    0.29
  -6 -13   1    6.14    0.34
   6  13  -1    6.41    0.31
  -6  13   1    5.73    0.42
   5 -13  -1   -0.09    0.12
  -5 -13   1    0.05    0.14
   5  13  -1   -0.12    0.09
   5  13  -1   -0.02    0.13
  -5  13   1    0.01    0.20
  -4 -13   1    0.24    0.15
   4 -13  -1    0.56    0.13
   4 -13  -1    0.33    0.12
   4  13  -1    0.34    0.09
  -4  13   1    0.38    0.15
  -4  13   1    0.45    0.19
   4  13  -1    0.46    0.13
   3 -13  -1    3.19    0.19
   3 -13  -1    3.20    0.20
  -3 -13   1    2.51    0.23
  -3  13   1    2.95    0.27
   3  13  -1    2.82    0.19
  -3  13   1    3.08    0.21
   3  13  -1    3.05    0.16
  -2 -13   1   26.63    0.65
   2 -13  -1   26.94    0.75
  -2 -13   1   26.43    0.78
   2 -13  -1   26.66    0.69
   2  13  -1   26.40    0.72
  -2  13   1   26.51    0.72
   2  13  -1   27.19    0.75
  -2  13   1   27.03    0.81
   1 -13  -1   12.15    0.42
  -1 -13   1   13.04    0.35
  -1 -13   1   13.84    0.44
   1 -13  -1   13.77    0.38
   1  13  -1   13.50    0.41
  -1  13   1   13.07    0.39
  -1  13   1   12.30    0.44
   1  13  -1   13.19    0.39
   0 -13  -1    7.53    0.30
   0 -13  -1    7.36    0.24
   0 -13   1    7.57    0.24
   0 -13   1    7.14    0.29
   0  13  -1    7.52    0.30
   0  13   1    7.85    0.29
   0  13   1    7.45    0.25
   0  13  -1    7.66    0.26
   1 -13   1   30.19    0.75
  -1 -13  -1   29.94    0.72
   1 -13   1   29.93    0.83
  -1 -13  -1   27.87    0.84
  -1  13  -1   29.15    0.87
   1  13   1   30.63    0.84
  -1  13  -1   31.15    0.79
   1  13   1   29.29    0.78
  -2 -13  -1    0.02    0.05
   2 -13   1   -0.08    0.09
  -2 -13  -1   -0.09    0.12
   2 -13   1    0.00    0.10
   2  13   1   -0.04    0.09
  -2  13  -1    0.07    0.11
  -2  13  -1    0.07    0.14
   2  13   1    0.01    0.08
  -3 -13  -1   31.92    0.93
   3 -13   1   32.18    0.88
   3 -13   1   31.82    0.83
   3  13   1   33.09    0.90
  -3  13  -1   32.96    0.99
  -3  13  -1   32.39    0.88
   3  13   1   32.51    0.87
   4 -13   1    1.58    0.16
  -4 -13  -1    1.62    0.20
   4  13   1    1.65    0.15
   4  13   1    1.50    0.16
  -4  13  -1    1.36    0.18
  -4  13  -1    1.70    0.23
   5 -13   1   25.22    0.69
  -5 -13  -1   24.78    0.77
   5  13   1   25.41    0.73
   5  13   1   25.03    0.71
  -5  13  -1   23.72    0.85
  -6 -13  -1    0.11    0.17
   6 -13   1   -0.17    0.13
  -6  13  -1   -0.02    0.23
   6  13   1    0.00    0.11
   6  13   1   -0.01    0.15
  -7 -13  -1    0.71    0.20
   7 -13   1    0.65    0.16
   7  13   1    0.73    0.18
  -7  13  -1    0.24    0.27
  -8 -13  -1    1.37    0.24
   8 -13   1    1.14    0.19
  -8  13  -1    1.27    0.32
   8  13   1    1.20    0.21
  -9 -13  -1    1.63    0.26
   9 -13   1    1.56    0.22
  -9  13  -1    1.80    0.37
   9  13   1    1.57    0.23
 -10 -13  -1    2.18    0.31
  10 -13   1    2.28    0.25
 -10  13  -1    2.81    0.43
  10  13   1    2.10    0.27
 -10 -14   1    0.00    0.23
  -9 -14   1    3.81    0.33
   9 -14  -1    3.43    0.29
   9  14  -1    3.58    0.31
  -9  14   1    3.27    0.43
   8 -14  -1    0.12    0.16
  -8 -14   1    0.41    0.21
  -8  14   1    0.18    0.29
   8  14  -1    0.16    0.17
   7 -14  -1    2.03    0.21
  -7 -14   1    2.40    0.26
   7  14  -1    2.39    0.22
  -7  14   1    2.32    0.33
  -6 -14   1    0.89    0.21
   6 -14  -1    0.63    0.15
   6  14  -1    0.76    0.16
  -6  14   1    0.74    0.26
  -5 -14   1    4.81    0.31
   5 -14  -1    5.42    0.27
   5  14  -1    4.75    0.27
  -5  14   1    4.96    0.38
   4 -14  -1    7.62    0.32
  -4 -14   1    8.98    0.37
  -4  14   1    8.05    0.42
   4  14  -1    9.46    0.30
   4  14  -1    8.91    0.34
   3 -14  -1   26.46    0.75
  -3 -14   1   26.58    0.80
   3 -14  -1   26.48    0.70
  -3  14   1   25.65    0.73
  -3  14   1   25.71    0.84
   3  14  -1   26.32    0.73
   3  14  -1   27.40    0.74
  -2 -14   1    1.48    0.18
   2 -14  -1    1.50    0.15
   2 -14  -1    1.48    0.13
  -2 -14   1    1.47    0.11
  -2  14   1    1.52    0.14
   2  14  -1    1.32    0.13
  -2  14   1    1.37    0.18
   2  14  -1    1.65    0.13
   1 -14  -1    7.43    0.25
  -1 -14   1    7.14    0.31
  -1 -14   1    6.86    0.22
   1 -14  -1    7.36    0.29
  -1  14   1    6.84    0.31
   1  14  -1    7.00    0.28
   1  14  -1    7.23    0.26
  -1  14   1    7.22    0.26
   0 -14   1    2.69    0.15
   0 -14  -1    2.77    0.15
   0 -14   1    3.01    0.20
   0 -14  -1    2.79    0.21
   0  14  -1    2.91    0.21
   0  14  -1    2.89    0.17
   0  14   1    2.77    0.20
   0  14   1    2.64    0.16
  -1 -14  -1    2.05    0.12
   1 -14   1    1.92    0.15
  -1 -14  -1    1.95    0.18
   1 -14   1    1.95    0.16
  -1  14  -1    1.69    0.18
   1  14   1    2.43    0.17
  -1  14  -1    1.94    0.15
   1  14   1    1.91    0.16
   2 -14   1   15.56    0.44
   2 -14   1   15.27    0.47
  -2 -14  -1   15.69    0.51
  -2 -14  -1   15.40    0.39
   2  14   1   15.50    0.47
   2  14   1   15.41    0.46
  -2  14  -1   15.27    0.47
  -2  14  -1   14.42    0.53
   3 -14   1    0.46    0.12
  -3 -14  -1    0.48    0.14
   3 -14   1    0.30    0.12
   3  14   1    0.58    0.10
  -3  14  -1    0.41    0.15
  -3  14  -1    0.38    0.18
   3  14   1    0.29    0.12
  -4 -14  -1    5.93    0.32
   4 -14   1    5.44    0.26
  -4  14  -1    5.44    0.31
  -4  14  -1    5.44    0.36
   4  14   1    5.90    0.27
   4  14   1    5.92    0.23
  -5 -14  -1    0.58    0.18
   5 -14   1    0.46    0.14
   5  14   1    0.37    0.11
  -5  14  -1    0.39    0.23
   5  14   1    0.44    0.15
  -6 -14  -1    3.58    0.29
   6 -14   1    3.50    0.24
  -6  14  -1    4.02    0.36
   6  14   1    3.47    0.26
   7 -14   1   12.23    0.43
  -7 -14  -1   11.93    0.50
   7  14   1   11.68    0.45
  -7  14  -1   11.73    0.60
   8 -14   1    4.08    0.28
  -8 -14  -1    4.21    0.33
   8  14   1    3.80    0.30
  -8  14  -1    4.39    0.43
   9 -14   1    0.03    0.18
  -9 -14  -1   -0.04    0.21
   9  14   1    0.14    0.20
  -9  14  -1    0.15    0.32
 -10 -14  -1    1.10    0.27
  -9 -15   1    6.76    0.41
   9 -15  -1    6.51    0.36
   9  15  -1    6.77    0.37
  -9  15   1    5.97    0.54
   8 -15  -1    9.05    0.40
  -8 -15   1    9.65    0.46
  -8  15   1    9.42    0.57
   8  15  -1    9.30    0.41
  -7 -15   1    0.22    0.20
   7 -15  -1    0.11    0.15
   7  15  -1   -0.08    0.15
  -7  15   1    0.17    0.27
   6 -15  -1    0.04    0.14
  -6 -15   1    0.12    0.19
  -6  15   1    0.13    0.24
   6  15  -1   -0.19    0.14
  -5 -15   1    2.27    0.25
   5 -15  -1    2.19    0.19
  -5  15   1    2.02    0.28
   5  15  -1    2.36    0.20
   4 -15  -1    2.66    0.21
  -4 -15   1    2.68    0.24
   4  15  -1    2.71    0.22
  -4  15   1    3.04    0.29
   3 -15  -1    1.97    0.16
   3 -15  -1    2.05    0.18
  -3 -15   1    2.28    0.22
   3  15  -1    2.22    0.19
  -3  15   1    1.88    0.23
  -3  15   1    1.68    0.18
   3  15  -1    2.56    0.17
   2 -15  -1    3.97    0.20
  -2 -15   1    4.35    0.27
  -2 -15   1    4.10    0.16
   2 -15  -1    4.22    0.24
  -2  15   1    3.96    0.23
   2  15  -1    4.28    0.22
   2  15  -1    4.33    0.21
  -2  15   1    4.27    0.29
   1 -15  -1    0.04    0.09
  -1 -15   1    0.24    0.14
   1 -15  -1   -0.01    0.13
  -1 -15   1    0.06    0.07
  -1  15   1   -0.10    0.13
   1  15  -1    0.05    0.10
   1  15  -1   -0.01    0.11
  -1  15   1   -0.14    0.10
   0 -15  -1    0.08    0.13
   0 -15   1    0.42    0.14
   0 -15  -1    0.26    0.08
   0 -15   1    0.34    0.09
   0  15  -1    0.27    0.13
   0  15   1    0.23    0.13
   0  15   1    0.16    0.10
   0  15  -1    0.24    0.10
  -1 -15  -1   12.20    0.34
  -1 -15  -1   12.64    0.44
   1 -15   1   12.69    0.42
   1 -15   1   12.70    0.37
  -1  15  -1   11.92    0.45
   1  15   1   12.14    0.41
   1  15   1   11.92    0.38
  -1  15  -1   12.46    0.39
  -2 -15  -1    8.25    0.35
   2 -15   1    8.41    0.29
   2 -15   1    8.28    0.32
  -2  15  -1    7.93    0.32
   2  15   1    8.65    0.31
   2  15   1    8.26    0.30
  -2  15  -1    7.58    0.37
   3 -15   1   13.30    0.42
   3 -15   1   13.70    0.44
  -3 -15  -1   13.62    0.49
  -3  15  -1   12.98    0.46
   3  15   1   13.92    0.44
   3  15   1   15.11    0.44
  -3  15  -1   13.82    0.54
   4 -15   1    0.69    0.14
  -4 -15  -1    0.64    0.18
  -4  15  -1    0.43    0.21
   4  15   1    0.64    0.12
   4  15   1    0.78    0.15
   5 -15   1    3.81    0.24
  -5 -15  -1    3.11    0.28
   5  15   1    4.05    0.21
   5  15   1    3.61    0.25
  -5  15  -1    4.32    0.36
   6 -15   1    1.44    0.18
  -6 -15  -1    1.75    0.23
   6  15   1    1.42    0.19
  -6  15  -1    1.46    0.29
  -7 -15  -1    0.24    0.21
   7 -15   1   -0.04    0.15
   7  15   1    0.23    0.17
  -7  15  -1    0.43    0.28
   8 -15   1    0.05    0.17
  -8 -15  -1    0.04    0.21
  -8  15  -1    0.04    0.29
   8  15   1    0.09    0.18
   9 -15   1    0.10    0.18
  -9 -15  -1    0.09    0.23
  -9  15  -1    0.03    0.32
   9  15   1   -0.03    0.19
   9 -16  -1    0.41    0.20
  -9 -16   1    0.31    0.24
  -9  16   1    0.17    0.34
   9  16  -1    0.09    0.19
   8 -16  -1   -0.01    0.17
  -8 -16   1   -0.03    0.21
   8  16  -1   -0.03    0.17
  -8  16   1   -0.03    0.29
   7 -16  -1    0.53    0.17
  -7 -16   1    0.73    0.22
   7  16  -1    0.51    0.18
  -7  16   1    0.86    0.30
  -6 -16   1    6.39    0.37
   6 -16  -1    6.16    0.31
  -6  16   1    5.83    0.45
   6  16  -1    6.25    0.32
   5 -16  -1    2.72    0.22
  -5 -16   1    3.25    0.29
  -5  16   1    2.92    0.32
   5  16  -1    3.10    0.24
  -4 -16   1    5.03    0.29
   4 -16  -1    5.08    0.26
   4  16  -1    5.27    0.27
  -4  16   1    4.91    0.37
   3 -16  -1    6.35    0.29
   3 -16  -1    6.30    0.28
  -3 -16   1    6.32    0.33
   3  16  -1    6.55    0.28
   3  16  -1    6.62    0.27
  -3  16   1    6.36    0.37
   2 -16  -1    0.76    0.12
   2 -16  -1    0.76    0.14
  -2 -16   1    0.98    0.18
  -2  16   1    0.65    0.18
  -2  16   1    0.56    0.14
   2  16  -1    0.85    0.13
   2  16  -1    0.80    0.13
  -1 -16   1    5.95    0.20
   1 -16  -1    5.36    0.23
  -1 -16   1    5.80    0.29
   1 -16  -1    5.35    0.27
   1  16  -1    5.93    0.24
  -1  16   1    5.39    0.24
  -1  16   1    4.86    0.30
   1  16  -1    6.08    0.27
   0 -16  -1    6.16    0.23
   0 -16   1    6.40    0.23
   0 -16  -1    5.98    0.30
   0 -16   1    6.22    0.29
   0  16   1    6.26    0.25
   0  16  -1    6.26    0.30
   0  16   1    6.27    0.29
   0  16  -1    6.23    0.26
   1 -16   1    3.10    0.23
   1 -16   1    2.68    0.17
  -1 -16  -1    2.90    0.23
  -1 -16  -1    2.73    0.15
  -1  16  -1    2.72    0.20
  -1  16  -1    2.79    0.23
   1  16   1    3.03    0.19
   1  16   1    3.05    0.21
   2 -16   1    0.45    0.14
  -2 -16  -1    0.52    0.17
   2 -16   1    0.51    0.12
  -2  16  -1    0.35    0.15
   2  16   1    0.29    0.12
  -2  16  -1    0.60    0.19
   2  16   1    0.78    0.13
  -3 -16  -1    5.06    0.30
   3 -16   1    4.49    0.23
  -3  16  -1    5.07    0.34
  -3  16  -1    4.26    0.28
   3  16   1    4.78    0.25
   3  16   1    4.93    0.23
  -4 -16  -1   -0.16    0.15
   4 -16   1    0.26    0.13
   4  16   1   -0.08    0.13
   4  16   1    0.04    0.11
  -4  16  -1    0.20    0.21
  -5 -16  -1    4.51    0.31
   5 -16   1    4.45    0.25
   5  16   1    4.35    0.27
  -5  16  -1    3.97    0.37
  -6 -16  -1    1.03    0.23
   6 -16   1    1.17    0.17
  -6  16  -1    0.91    0.28
   6  16   1    1.25    0.19
   7 -16   1    0.01    0.15
  -7 -16  -1   -0.05    0.20
   7  16   1    0.10    0.17
  -7  16  -1   -0.14    0.27
  -8 -16  -1    0.36    0.23
   8 -16   1   -0.22    0.16
   8  16   1    0.04    0.18
  -8  16  -1    0.11    0.30
  -9 -16  -1    0.20    0.24
   9 -16   1    0.30    0.19
  -9  16  -1    0.65    0.35
   9  16   1    0.33    0.20
  -9 -17   1   -0.34    0.22
  -8 -17   1    2.20    0.30
   8 -17  -1    2.02    0.23
   8  17  -1    2.28    0.24
  -8  17   1    2.22    0.39
   7 -17  -1    4.22    0.28
  -7 -17   1    4.39    0.34
   7  17  -1    3.81    0.29
  -7  17   1    4.21    0.42
  -6 -17   1    3.45    0.31
   6 -17  -1    3.25    0.25
   6  17  -1    3.33    0.25
  -6  17   1    3.12    0.36
   5 -17  -1    1.03    0.17
  -5 -17   1    1.45    0.23
   5  17  -1    1.14    0.17
  -5  17   1    0.96    0.27
   4 -17  -1    0.10    0.13
  -4 -17   1    0.23    0.18
   4  17  -1    0.12    0.14
  -4  17   1    0.30    0.22
  -3 -17   1    0.56    0.19
   3 -17  -1    0.52    0.13
   3  17  -1    0.47    0.13
  -3  17   1    0.66    0.21
   2 -17  -1    2.94    0.23
  -2 -17   1    3.36    0.26
   2 -17  -1    2.99    0.20
   2  17  -1    3.21    0.21
  -2  17   1    3.03    0.29
  -2  17   1    2.79    0.23
   2  17  -1    3.42    0.22
  -1 -17   1    4.25    0.18
  -1 -17   1    4.09    0.27
   1 -17  -1    4.55    0.21
   1 -17  -1    4.61    0.26
   1  17  -1    4.56    0.25
  -1  17   1    4.29    0.23
  -1  17   1    4.25    0.29
   1  17  -1    4.04    0.22
   0 -17  -1    9.45    0.37
   0 -17   1    8.74    0.29
   0 -17  -1    9.08    0.29
   0 -17   1    9.08    0.37
   0  17   1    9.04    0.37
   0  17   1    8.98    0.31
   0  17  -1    8.87    0.32
   0  17  -1    8.72    0.37
   1 -17   1    2.01    0.19
   1 -17   1    2.34    0.17
  -1 -17  -1    2.13    0.21
  -1  17  -1    1.93    0.17
  -1  17  -1    1.92    0.22
   1  17   1    1.48    0.15
   1  17   1    2.00    0.18
   2 -17   1    2.63    0.18
  -2 -17  -1    2.84    0.25
   2 -17   1    2.62    0.22
   2  17   1    2.93    0.21
  -2  17  -1    2.49    0.25
   2  17   1    2.51    0.19
  -2  17  -1    2.22    0.20
  -3 -17  -1    1.59    0.22
   3 -17   1    1.35    0.16
  -3  17  -1    1.47    0.24
   3  17   1    1.64    0.15
   3  17   1    1.63    0.17
   4 -17   1   -0.03    0.12
  -4 -17  -1   -0.04    0.17
   4  17   1    0.01    0.13
  -4  17  -1    0.17    0.22
  -5 -17  -1    9.50    0.43
   5 -17   1    9.01    0.36
  -5  17  -1    9.33    0.50
   5  17   1    9.31    0.38
   6 -17   1   -0.03    0.14
  -6 -17  -1    0.33    0.21
  -6  17  -1    0.19    0.27
   6  17   1    0.00    0.16
   7 -17   1   -0.02    0.15
  -7 -17  -1    0.16    0.21
  -7  17  -1    0.02    0.28
   7  17   1    0.12    0.17
   8 -17   1    3.75    0.29
  -8 -17  -1    3.96    0.35
  -8  17  -1    4.62    0.46
   8  17   1    4.38    0.32
  -9 -17  -1    3.37    0.34
  -8 -18   1    0.52    0.24
   8 -18  -1    0.09    0.18
   8  18  -1    0.48    0.19
  -8  18   1    0.33    0.33
  -7 -18   1    0.49    0.24
   7 -18  -1    0.22    0.17
  -7  18   1   -0.14    0.29
   7  18  -1    0.61    0.19
  -6 -18   1    0.85    0.23
   6 -18  -1    1.12    0.18
  -6  18   1    1.27    0.31
   6  18  -1    1.07    0.19
   5 -18  -1   10.89    0.39
  -5 -18   1   10.20    0.46
  -5  18   1    9.99    0.53
   5  18  -1   10.20    0.40
   4 -18  -1    2.00    0.19
  -4 -18   1    2.17    0.25
   4  18  -1    1.75    0.18
  -4  18   1    1.93    0.28
   3 -18  -1    0.98    0.15
  -3 -18   1    1.43    0.22
  -3  18   1    1.15    0.24
   3  18  -1    1.14    0.16
   2 -18  -1    0.30    0.12
  -2 -18   1    0.41    0.18
   2 -18  -1    0.36    0.15
   2  18  -1    0.37    0.13
   2  18  -1    0.48    0.14
  -2  18   1    0.43    0.19
  -1 -18   1    0.19    0.18
   1 -18  -1    0.22    0.10
   1 -18  -1    0.24    0.16
  -1  18   1    0.16    0.13
   1  18  -1    0.07    0.12
  -1  18   1    0.11    0.17
   1  18  -1    0.27    0.14
   0 -18  -1    2.29    0.22
   0 -18  -1    1.94    0.15
   0 -18   1    2.23    0.22
   0 -18   1    2.19    0.16
   0  18  -1    1.77    0.17
   0  18  -1    2.29    0.21
   0  18   1    2.21    0.21
   0  18   1    1.98    0.17
  -1 -18  -1    0.23    0.16
   1 -18   1    0.28    0.15
   1 -18   1    0.08    0.10
   1  18   1    0.35    0.15
  -1  18  -1    0.07    0.13
  -1  18  -1    0.44    0.18
   1  18   1    0.36    0.12
  -2 -18  -1    0.09    0.17
   2 -18   1    0.18    0.11
   2 -18   1    0.38    0.16
  -2  18  -1    0.21    0.19
   2  18   1    0.38    0.14
  -2  18  -1    0.34    0.16
   2  18   1    0.25    0.12
  -3 -18  -1    1.27    0.22
   3 -18   1    1.09    0.15
   3  18   1    1.43    0.16
  -3  18  -1    1.32    0.24
   3  18   1    1.19    0.16
   4 -18   1    0.41    0.14
  -4 -18  -1    0.11    0.19
  -4  18  -1    0.70    0.24
   4  18   1    0.31    0.15
   5 -18   1    2.24    0.20
  -5 -18  -1    2.42    0.27
  -5  18  -1    2.01    0.31
   5  18   1    2.48    0.22
  -6 -18  -1    0.85    0.23
   6 -18   1    0.69    0.17
   6  18   1    0.25    0.17
  -6  18  -1    0.73    0.29
  -7 -18  -1    0.34    0.23
   7 -18   1    0.42    0.17
   7  18   1    0.62    0.19
  -7  18  -1    0.30    0.30
  -8 -18  -1    4.28    0.37
   8 -18   1    3.86    0.30
   8  18   1    4.02    0.32
  -8  18  -1    3.75    0.45
  -8 -19   1    1.58    0.29
   8 -19  -1    1.16    0.22
  -8  19   1    1.47    0.39
  -7 -19   1    1.20    0.27
   7 -19  -1    1.41    0.22
  -7  19   1    1.86    0.36
   7  19  -1    1.73    0.22
   6 -19  -1    2.67    0.23
  -6 -19   1    2.71    0.30
   6  19  -1    2.63    0.24
  -6  19   1    2.72    0.36
   5 -19  -1    0.13    0.15
  -5 -19   1    0.38    0.21
  -5  19   1   -0.37    0.24
   5  19  -1    0.18    0.15
  -4 -19   1    8.25    0.41
   4 -19  -1    8.19    0.34
   4  19  -1    8.66    0.35
  -4  19   1    9.03    0.47
  -3 -19   1   -0.14    0.18
   3 -19  -1   -0.19    0.12
  -3  19   1    0.33    0.22
   3  19  -1   -0.09    0.13
   2 -19  -1    4.16    0.22
  -2 -19   1    3.66    0.29
   2 -19  -1    4.40    0.28
   2  19  -1    3.62    0.23
  -2  19   1    4.30    0.32
   1 -19  -1   -0.06    0.10
  -1 -19   1    0.11    0.17
   1 -19  -1   -0.08    0.16
  -1  19   1    0.07    0.18
   1  19  -1    0.12    0.12
  -1  19   1    0.06    0.13
   1  19  -1    0.16    0.15
   0 -19   1    3.94    0.19
   0 -19  -1    3.59    0.27
   0 -19   1    3.70    0.27
   0  19   1    3.79    0.29
   0  19  -1    3.90    0.29
   0  19  -1    3.69    0.23
   0  19   1    3.70    0.22
   1 -19   1    6.21    0.25
   1 -19   1    6.21    0.32
  -1 -19  -1    5.83    0.33
   1  19   1    6.27    0.31
  -1  19  -1    6.34    0.36
  -1  19  -1    5.98    0.28
   1  19   1    5.56    0.26
  -2 -19  -1   -0.02    0.15
   2 -19   1   -0.01    0.11
   2  19   1   -0.04    0.14
   2  19   1   -0.03    0.13
  -2  19  -1    0.08    0.19
  -3 -19  -1    0.21    0.19
   3 -19   1    0.13    0.13
  -3  19  -1    0.15    0.22
   3  19   1    0.06    0.13
  -4 -19  -1    0.17    0.20
   4 -19   1   -0.04    0.13
  -4  19  -1    0.14    0.23
   4  19   1    0.25    0.15
  -5 -19  -1    1.14    0.24
   5 -19   1    1.41    0.18
   5  19   1    1.22    0.19
  -5  19  -1    1.27    0.29
  -6 -19  -1    0.04    0.22
   6 -19   1    0.11    0.16
   6  19   1    0.04    0.17
  -6  19  -1    0.19    0.28
  -7 -19  -1    0.28    0.24
   7 -19   1    0.24    0.17
  -7  19  -1    0.34    0.32
   7  19   1    0.11    0.18
   8 -19   1    0.29    0.19
  -8 -19  -1    0.53    0.26
  -8  19  -1    0.66    0.35
  -7 -20   1    3.67    0.35
   7 -20  -1    3.04    0.27
  -7  20   1    3.44    0.42
   7  20  -1    3.61    0.29
   6 -20  -1    0.37    0.17
  -6 -20   1    0.83    0.25
   6  20  -1    0.33    0.17
  -6  20   1    0.31    0.30
  -5 -20   1    0.01    0.21
   5 -20  -1    0.12    0.15
  -5  20   1    0.03    0.26
   5  20  -1   -0.13    0.15
   4 -20  -1    0.63    0.15
  -4 -20   1    0.83    0.23
   4  20  -1    0.83    0.17
  -4  20   1    0.43    0.25
  -3 -20   1    4.57    0.33
   3 -20  -1    4.45    0.25
  -3  20   1    4.42    0.36
   3  20  -1    4.44    0.26
   2 -20  -1    2.42    0.20
  -2 -20   1    3.07    0.28
   2 -20  -1    2.48    0.23
  -2  20   1    2.54    0.27
   2  20  -1    2.35    0.21
   1 -20  -1    0.06    0.11
  -1 -20   1   -0.07    0.18
   1 -20  -1   -0.14    0.16
  -1  20   1   -0.01    0.18
   1  20  -1   -0.01    0.13
   0 -20   1    0.37    0.19
   0 -20  -1    0.18    0.19
   0  20  -1    0.14    0.14
   0  20   1    0.40    0.18
   0  20   1   -0.06    0.13
   0  20  -1    0.47    0.18
  -1 -20  -1    0.30    0.18
   1 -20   1    0.19    0.17
   1 -20   1    0.17    0.11
  -1  20  -1    0.25    0.19
   1  20   1    0.15    0.13
   1  20   1    0.56    0.17
  -1  20  -1   -0.10    0.14
   2 -20   1    0.57    0.13
  -2 -20  -1    0.93    0.21
  -2  20  -1    0.60    0.22
   2  20   1    0.58    0.14
   3 -20   1   12.66    0.43
  -3 -20  -1   13.75    0.54
   3  20   1   13.22    0.45
  -3  20  -1   14.24    0.58
   4 -20   1    2.37    0.20
  -4 -20  -1    2.33    0.28
  -4  20  -1    2.56    0.32
   4  20   1    2.03    0.20
  -5 -20  -1    1.62    0.27
   5 -20   1    1.80    0.20
   5  20   1    1.57    0.20
  -5  20  -1    1.31    0.31
   6 -20   1    0.13    0.16
  -6 -20  -1    0.54    0.24
  -6  20  -1    0.43    0.30
   6  20   1    0.11    0.17
   7 -20   1    3.26    0.26
  -7 -20  -1    3.52    0.34
  -7  20  -1    3.64    0.43
   7  20   1    3.14    0.27
   7 -21  -1    0.28    0.19
   7  21  -1    0.38    0.19
  -7  21   1    0.01    0.32
   6 -21  -1    0.65    0.18
  -6 -21   1    0.86    0.26
  -6  21   1    0.88    0.32
   6  21  -1    0.53    0.19
   5 -21  -1    0.22    0.16
  -5 -21   1    0.26    0.23
  -5  21   1    0.08    0.27
   5  21  -1    0.26    0.17
  -4 -21   1    1.57    0.26
   4 -21  -1    1.59    0.19
   4  21  -1    1.77    0.20
  -4  21   1    2.04    0.30
  -3 -21   1    0.34    0.21
   3 -21  -1    0.43    0.14
  -3  21   1    0.29    0.24
   3  21  -1    0.48    0.15
  -2 -21   1    2.75    0.28
   2 -21  -1    2.86    0.21
   2  21  -1    2.68    0.21
  -2  21   1    2.93    0.29
   1 -21  -1    2.71    0.25
  -1 -21   1    2.62    0.26
  -1  21   1    2.70    0.27
   1  21  -1    2.39    0.20
   0 -21   1    0.26    0.18
   0 -21  -1    0.09    0.18
   0  21   1    0.63    0.19
   0  21   1    0.27    0.15
   0  21  -1    0.51    0.19
   0  21  -1    0.34    0.15
  -1 -21  -1   -0.11    0.18
   1 -21   1   -0.18    0.16
   1 -21   1    0.04    0.11
  -1  21  -1    0.14    0.19
   1  21   1    0.26    0.17
   1  21   1    0.08    0.13
  -2 -21  -1    0.60    0.21
   2 -21   1    0.75    0.14
  -2  21  -1    0.48    0.23
   2  21   1    0.40    0.15
  -3 -21  -1    0.22    0.20
   3 -21   1    0.48    0.15
   3  21   1    0.18    0.15
  -3  21  -1    0.63    0.24
  -4 -21  -1   -0.14    0.21
   4 -21   1   -0.08    0.14
   4  21   1   -0.01    0.15
  -4  21  -1   -0.09    0.25
   5 -21   1    0.90    0.18
  -5 -21  -1    1.36    0.27
   5  21   1    1.22    0.19
  -5  21  -1    1.02    0.31
   6 -21   1    1.91    0.22
  -6 -21  -1    2.59    0.31
   6  21   1    2.17    0.24
  -6  21  -1    2.23    0.37
   7 -21   1    1.89    0.23
   7  21   1    2.17    0.25
  -7  21  -1    1.97    0.40
   6 -22  -1    0.13    0.18
  -6 -22   1    0.49    0.25
  -6  22   1    0.62    0.32
   6  22  -1    0.33    0.19
  -5 -22   1    5.33    0.38
   5 -22  -1    4.68    0.29
  -5  22   1    5.85    0.46
   5  22  -1    4.84    0.30
   4 -22  -1    2.39    0.21
  -4 -22   1    2.80    0.30
  -4  22   1    2.35    0.33
   4  22  -1    2.12    0.22
   3 -22  -1   -0.08    0.13
  -3 -22   1    0.35    0.22
   3  22  -1    0.04    0.15
  -3  22   1    0.31    0.24
   2 -22  -1   -0.05    0.12
  -2 -22   1    0.25    0.20
   2  22  -1    0.16    0.15
  -2  22   1    0.08    0.22
   1 -22  -1    6.84    0.36
  -1 -22   1    7.72    0.39
  -1  22   1    7.75    0.41
   1  22  -1    6.86    0.32
   0 -22   1   -0.02    0.18
   0 -22  -1    0.00    0.18
   0  22  -1    0.07    0.16
   0  22   1   -0.07    0.19
  -1 -22  -1    0.67    0.21
  -1  22  -1    0.65    0.22
   1  22   1    0.37    0.15
   2 -22   1    0.26    0.13
  -2 -22  -1    0.44    0.22
  -2  22  -1    0.21    0.22
   2  22   1    0.31    0.15
   3 -22   1    1.12    0.17
  -3 -22  -1    1.46    0.26
  -3  22  -1    1.34    0.27
   3  22   1    0.97    0.18
   4 -22   1    3.47    0.25
  -4 -22  -1    4.17    0.34
   4  22   1    3.83    0.27
  -4  22  -1    4.65    0.41
   5 -22   1   -0.26    0.15
  -5 -22  -1    0.11    0.24
   5  22   1   -0.06    0.17
  -5  22  -1    0.35    0.29
  -6 -22  -1    1.16    0.28
   6 -22   1    0.89    0.19
   6  22   1    1.02    0.21
  -6  22  -1    1.12    0.34
   6 -23  -1    0.33    0.18
  -6  23   1    0.89    0.34
   5 -23  -1    1.12    0.19
  -5 -23   1    1.33    0.28
  -5  23   1    1.54    0.34
   5  23  -1    1.37    0.21
   4 -23  -1    0.25    0.16
  -4 -23   1    0.46    0.25
  -4  23   1    0.52    0.28
   4  23  -1    0.48    0.18
   3 -23  -1    0.42    0.15
  -3 -23   1    0.61    0.23
  -3  23   1    0.51    0.26
   3  23  -1    0.50    0.17
  -2 -23   1    1.28    0.25
  -2  23   1    1.18    0.26
   2  23  -1    0.62    0.17
  -1 -23   1    1.73    0.26
   1  23  -1    1.58    0.20
  -1  23   1    1.85    0.27
   0 -23  -1    6.12    0.37
   0 -23   1    6.35    0.38
  -1 -23  -1    0.06    0.22
   2 -23   1    0.03    0.13
  -2 -23  -1    0.24    0.22
   2  23   1   -0.10    0.14
  -2  23  -1   -0.01    0.22
  -3 -23  -1    1.32    0.26
   3 -23   1    1.33    0.18
   3  23   1    1.03    0.18
  -3  23  -1    0.95    0.28
  -4 -23  -1    0.75    0.25
   4 -23   1    0.68    0.17
  -4  23  -1    1.66    0.31
   4  23   1    1.01    0.19
  -5 -23  -1    1.31    0.29
   5 -23   1    1.26    0.20
   5  23   1    1.31    0.21
  -5  23  -1    1.58    0.34
  -6  23  -1    0.49    0.34
   5 -24  -1    0.94    0.19
   5  24  -1    1.12    0.21
  -5  24   1    1.23    0.35
   4 -24  -1    2.75    0.23
  -4 -24   1    3.03    0.33
   4  24  -1    2.35    0.24
  -4  24   1    3.35    0.38
  -3 -24   1    0.17    0.23
   3 -24  -1    0.06    0.15
   3  24  -1   -0.17    0.15
  -3  24   1    0.02    0.25
  -2 -24   1    0.23    0.22
   2  24  -1    0.05    0.16
  -2  24   1    0.34    0.24
  -1 -24   1    2.49    0.29
   1  24  -1    2.25    0.23
   0 -24  -1    3.19    0.29
   0 -24   1    3.09    0.29
  -1 -24  -1    0.22    0.22
  -2 -24  -1    0.41    0.23
   2  24   1    0.09    0.16
   3 -24   1    0.29    0.16
  -3 -24  -1    0.78    0.25
   3  24   1    0.55    0.18
  -3  24  -1    0.44    0.27
  -4 -24  -1    0.38    0.25
   4 -24   1    0.38    0.17
  -4  24  -1    0.75    0.30
   4  24   1    0.40    0.18
   5 -24   1    0.10    0.17
  -5  24  -1    0.11    0.30
   5  24   1   -0.03    0.18
  -4 -25   1    0.16    0.25
   4 -25  -1    0.42    0.17
   4  25  -1   -0.07    0.18
  -4  25   1    0.77    0.30
  -3 -25   1    0.07    0.25
   3  25  -1   -0.22    0.17
  -3  25   1    0.58    0.28
  -2 -25   1   -0.02    0.22
   2  25  -1   -0.12    0.17
  -1 -25   1    0.32    0.22
   0 -25  -1    2.34    0.28
  -1 -25  -1    5.03    0.37
  -2 -25  -1    0.03    0.23
   3 -25   1    0.40    0.16
  -3 -25  -1    0.48    0.25
   3  25   1    0.21    0.18
   4 -25   1    0.04    0.16
  -4  25  -1    0.19    0.30
   4  25   1    0.09    0.19
  -5  25  -1    3.31    0.41
  -4  26   1    0.82    0.32
  -3 -26   1    2.83    0.33
   3  26  -1    2.18    0.25
  -2 -26   1    0.48    0.24
  -1 -26   1    3.19    0.33
  -1 -26  -1    0.42    0.24
  -2 -26  -1    1.10    0.27
  -3 -26  -1   -0.01    0.24
   4 -26   1    0.80    0.19
  -2 -27   1    0.33    0.25
  -1 -27  -1    1.36    0.28
  11   0  -2    0.08    0.22
 -10   0   2    6.13    0.41
  -9   0   2    0.35    0.25
  -9   0   2   -0.03    0.21
   9   0  -2   -0.11    0.13
  -8   0   2    2.38    0.26
  -8   0   2    2.31    0.29
   8   0  -2    2.15    0.18
  -8   0   2    2.20    0.20
  -7   0   2   -0.07    0.12
  -7   0   2    0.02    0.18
  -7   0   2   -0.05    0.19
  -6   0   2   53.97    1.32
  -6   0   2   53.96    1.42
  -6   0   2   54.65    1.43
  -6   0   2   52.14    1.54
  -5   0   2   -0.10    0.09
  -5   0   2   -0.02    0.10
  -5   0   2    0.18    0.13
  -5   0   2   -0.02    0.14
  -4   0   2   10.41    0.33
  -4   0   2   11.00    0.38
  -4   0   2   10.59    0.34
  -4   0   2   10.76    0.41
  -3   0   2    0.07    0.11
  -3   0   2    0.01    0.07
  -3   0   2    0.05    0.10
  -3   0   2   -0.06    0.08
  -2   0   2   18.72    0.47
  -2   0   2   18.46    0.50
  -2   0   2   18.25    0.54
  -2   0   2   18.03    0.50
  -1   0   2   -0.09    0.04
  -1   0   2   -0.02    0.04
  -1   0   2   -0.10    0.05
   0   0   2    0.02    0.01
   0   0   2    0.02    0.01
   0   0  -2    0.01    0.02
   0   0  -2    0.02    0.03
   1   0   2   -0.76    0.03
  -1   0  -2   -0.75    0.03
  -1   0  -2   -0.73    0.06
   2   0   2  306.18    7.13
  -2   0  -2  307.17    8.09
  -2   0  -2  302.90    7.52
  -2   0  -2  310.68    7.74
   3   0   2   -0.05    0.05
  -3   0  -2   -0.07    0.11
  -3   0  -2    0.11    0.07
  -3   0  -2   -0.12    0.12
  -4   0  -2   36.83    0.97
   4   0   2   35.75    0.90
  -4   0  -2   37.57    1.08
  -4   0  -2   37.69    1.00
  -5   0  -2    0.33    0.15
  -5   0  -2    0.27    0.10
   5   0   2    0.02    0.08
  -5   0  -2    0.47    0.17
  -6   0  -2    3.58    0.30
  -6   0  -2    3.62    0.33
   6   0   2    3.17    0.19
  -6   0  -2    3.30    0.19
   7   0   2    0.01    0.10
  -7   0  -2    0.06    0.11
  -7   0  -2    0.33    0.22
  -7   0  -2    0.05    0.19
   8   0   2   17.94    0.52
  -8   0  -2   17.66    0.64
  -9   0  -2   -0.31    0.22
   9   0   2   -0.05    0.18
 -10   0  -2    0.29    0.25
  10   0   2    0.32    0.21
  11   0   2    0.11    0.23
 -11   0  -2    0.01    0.27
  12   0   2   -0.06    0.25
  12  -1  -2    0.72    0.27
  11   1  -2   -0.01    0.22
 -10  -1   2    0.22    0.23
 -10   1   2    0.27    0.28
  10   1  -2    0.32    0.20
   9  -1  -2   -0.02    0.14
  -9  -1   2    0.12    0.21
  -9   1   2    0.16    0.24
   9   1  -2    0.25    0.13
  -9   1   2    0.02    0.21
  -8  -1   2   20.78    0.63
   8  -1  -2   20.18    0.59
  -8  -1   2   20.35    0.68
  -8  -1   2   19.78    0.75
  -8   1   2   20.00    0.76
  -8   1   2   18.93    0.68
   8   1  -2   20.77    0.59
  -7  -1   2    0.17    0.19
  -7  -1   2    0.11    0.17
  -7  -1   2    0.27    0.14
   7  -1  -2    0.17    0.12
  -7   1   2    0.04    0.17
  -7   1   2    0.14    0.13
  -7   1   2    0.07    0.19
  -6  -1   2    0.45    0.16
  -6  -1   2    0.68    0.11
  -6  -1   2    0.41    0.12
  -6  -1   2    0.62    0.18
  -6   1   2    0.60    0.16
  -6   1   2    0.65    0.18
  -6   1   2    0.45    0.12
  -5  -1   2   -0.09    0.14
  -5  -1   2   -0.07    0.13
  -5  -1   2   -0.02    0.10
  -5  -1   2   -0.07    0.08
  -5   1   2   -0.05    0.14
  -5   1   2   -0.09    0.09
  -5   1   2    0.03    0.09
  -5   1   2   -0.07    0.12
  -4  -1   2    4.83    0.21
  -4  -1   2    4.63    0.28
  -4  -1   2    4.42    0.26
  -4  -1   2    4.55    0.21
  -4   1   2    4.88    0.21
  -4   1   2    4.65    0.22
  -4   1   2    5.03    0.27
  -4   1   2    4.91    0.28
  -3  -1   2   19.98    0.56
  -3  -1   2   20.04    0.61
  -3  -1   2   20.41    0.57
  -3  -1   2   20.46    0.52
  -3   1   2   20.19    0.56
  -3   1   2   20.13    0.52
  -3   1   2   20.30    0.61
  -3   1   2   20.27    0.56
  -2  -1   2    1.79    0.13
  -2  -1   2    1.68    0.13
  -2  -1   2    1.46    0.11
  -2  -1   2    1.55    0.13
  -2   1   2    1.33    0.10
  -2   1   2    1.44    0.11
  -2   1   2    1.40    0.13
  -1  -1   2   -0.04    0.04
   1  -1  -2   -0.03    0.05
  -1  -1   2   -0.07    0.05
  -1  -1   2   -0.06    0.05
   1   1  -2   -0.04    0.03
  -1   1   2   -0.04    0.04
  -1   1   2   -0.10    0.05
  -1   1   2   -0.07    0.05
   0  -1   2  166.65    4.34
   0  -1   2  171.04    3.98
   0  -1  -2  182.61    4.19
   0  -1  -2  174.68    4.36
   0   1   2  163.90    4.51
   0   1  -2  173.34    4.20
   0   1   2  170.66    3.97
  -1  -1  -2    8.58    0.26
   1  -1   2    8.62    0.21
  -1  -1  -2    8.65    0.23
  -1   1  -2    8.19    0.25
  -1   1  -2    7.64    0.27
   1   1   2    8.34    0.20
   1   1   2    8.29    0.25
  -2  -1  -2   65.06    1.64
   2  -1   2   63.97    1.50
  -2  -1  -2   67.31    1.62
  -2   1  -2   65.51    1.62
   2   1   2   63.58    1.49
  -2   1  -2   64.42    1.61
  -2   1  -2   63.36    1.74
   2   1   2   61.11    1.71
   3  -1   2   50.97    1.20
  -3  -1  -2   51.09    1.31
  -3  -1  -2   49.78    1.31
  -3  -1  -2   48.54    1.40
   3   1   2   50.82    1.20
  -3   1  -2   50.79    1.41
  -3   1  -2   53.87    1.30
  -3   1  -2   51.05    1.30
  -4  -1  -2    6.53    0.32
  -4  -1  -2    6.53    0.34
  -4  -1  -2    6.72    0.24
   4  -1   2    6.21    0.22
   4   1   2    6.26    0.22
  -4   1  -2    6.46    0.33
  -4   1  -2    6.26    0.32
  -4   1  -2    6.56    0.23
  -5  -1  -2   63.88    1.68
   5  -1   2   63.37    1.54
  -5  -1  -2   65.12    1.68
  -5  -1  -2   62.80    1.81
  -5   1  -2   65.65    1.82
   5   1   2   64.04    1.53
  -5   1  -2   66.12    1.67
  -5   1  -2   65.10    1.68
   6  -1   2   70.84    1.68
  -6  -1  -2   66.19    1.83
  -6  -1  -2   70.68    1.83
  -6   1  -2   72.15    1.99
  -6   1  -2   70.78    1.82
   6   1   2   70.57    1.67
  -6   1  -2   68.98    1.83
  -7  -1  -2   14.68    0.55
  -7  -1  -2   14.64    0.48
   7  -1   2   15.37    0.44
  -7   1  -2   14.90    0.56
   7   1   2   14.43    0.43
  -7   1  -2   15.27    0.62
   8  -1   2    2.00    0.17
  -8  -1  -2    1.74    0.26
   8   1   2    1.76    0.23
   8   1   2    1.68    0.15
  -8   1  -2    1.88    0.27
  -8   1  -2    1.64    0.29
   9  -1   2    1.11    0.15
  -9  -1  -2    0.90    0.26
  -9   1  -2    0.83    0.25
   9   1   2    0.89    0.21
  10  -1   2    0.41    0.22
 -10  -1  -2    0.58    0.26
  10   1   2    0.41    0.21
 -10   1  -2    0.64    0.26
 -11  -1  -2    4.05    0.39
  11  -1   2    3.60    0.35
  11   1   2    3.86    0.35
  12  -1   2    0.87    0.28
  12   1   2    0.85    0.27
  12  -2  -2    5.76    0.44
 -11   2   2    7.19    0.57
  10  -2  -2    1.41    0.19
 -10  -2   2    1.73    0.27
 -10   2   2    1.30    0.32
  10   2  -2    1.21    0.23
   9  -2  -2    0.03    0.14
  -9  -2   2    0.15    0.21
  -9   2   2    0.47    0.22
   9   2  -2    0.35    0.18
  -9   2   2    0.35    0.26
  -8  -2   2    0.50    0.17
   8  -2  -2    0.39    0.14
  -8  -2   2    0.56    0.21
  -8   2   2    0.42    0.24
  -8   2   2    0.65    0.21
  -7  -2   2    1.06    0.20
  -7  -2   2    1.06    0.22
   7  -2  -2    0.82    0.14
  -7  -2   2    0.70    0.16
   7  -2  -2    0.90    0.16
  -7  -2   2    1.13    0.14
  -7   2   2    1.00    0.23
  -7   2   2    1.19    0.20
  -6  -2   2   13.56    0.45
  -6  -2   2   12.62    0.40
   6  -2  -2   13.50    0.42
  -6  -2   2   13.18    0.48
  -6  -2   2   13.44    0.52
   6  -2  -2   14.34    0.44
  -6   2   2   13.05    0.53
  -6   2   2   15.00    0.48
  -5  -2   2   14.24    0.40
   5  -2  -2   13.12    0.42
  -5  -2   2   14.21    0.50
  -5  -2   2   13.73    0.46
  -5  -2   2   13.48    0.43
  -5   2   2   13.80    0.46
  -5   2   2   13.78    0.41
  -5   2   2   13.47    0.51
   4  -2  -2    9.87    0.33
  -4  -2   2   10.95    0.38
  -4  -2   2   10.54    0.35
  -4  -2   2   10.57    0.31
  -4  -2   2   10.54    0.40
  -4   2   2   10.34    0.37
  -4   2   2   10.39    0.41
  -4   2   2    9.86    0.33
   3  -2  -2   29.79    0.81
  -3  -2   2   29.85    0.81
  -3  -2   2   32.26    0.75
  -3  -2   2   31.01    0.82
  -3  -2   2   30.24    0.87
  -3   2   2   30.74    0.88
  -3   2   2   30.29    0.80
  -3   2   2   30.31    0.76
  -2  -2   2  160.61    4.04
   2  -2  -2  151.34    3.98
  -2  -2   2  161.31    3.87
  -2  -2   2  155.05    4.17
  -2  -2   2  158.68    3.65
  -2   2   2  158.18    4.16
  -2   2   2  161.10    3.86
  -1  -2   2    6.97    0.18
  -1  -2   2    6.92    0.22
   1  -2  -2    6.75    0.21
   1   2  -2    6.75    0.20
   1   2  -2    7.14    0.20
  -1   2   2    6.65    0.21
  -1   2   2    6.73    0.22
   0  -2  -2   19.53    0.51
   0  -2   2   19.27    0.46
   0  -2   2   19.70    0.51
   0  -2  -2   19.33    0.49
   0   2  -2   20.20    0.49
   0   2  -2   20.78    0.53
   0   2   2   19.50    0.52
   0   2   2   19.16    0.46
  -1  -2  -2    0.70    0.10
   1  -2   2    0.72    0.06
  -1  -2  -2    0.69    0.07
   1   2   2    0.71    0.07
  -1   2  -2    0.71    0.10
  -1   2  -2    0.75    0.08
  -2  -2  -2   44.82    1.13
   2  -2   2   43.71    1.04
  -2  -2  -2   42.49    1.13
  -2   2  -2   44.68    1.21
   2   2   2   43.75    1.02
   2   2   2   42.87    1.18
  -2   2  -2   44.26    1.11
  -3  -2  -2    6.65    0.29
   3  -2   2    6.75    0.22
  -3  -2  -2    6.46    0.24
   3   2   2    6.59    0.20
  -3   2  -2    6.49    0.29
  -3   2  -2    7.06    0.21
   3   2   2    6.45    0.26
  -3   2  -2    6.64    0.31
  -4  -2  -2   21.49    0.59
   4  -2   2   21.20    0.55
  -4  -2  -2   21.00    0.63
  -4   2  -2   20.78    0.62
   4   2   2   20.90    0.53
   4   2   2   20.30    0.63
  -4   2  -2   21.33    0.69
  -4   2  -2   21.76    0.57
   5  -2   2   41.57    0.99
  -5  -2  -2   39.42    1.07
  -5  -2  -2   38.33    1.09
  -5   2  -2   41.36    1.19
   5   2   2   40.19    1.14
  -5   2  -2   40.55    1.05
  -5   2  -2   39.63    1.09
   5   2   2   39.81    0.97
   6  -2   2    1.56    0.13
  -6  -2  -2    1.50    0.15
  -6  -2  -2    1.72    0.21
   6   2   2    1.50    0.12
  -6   2  -2    1.57    0.23
  -6   2  -2    1.32    0.12
   6   2   2    1.31    0.17
  -6   2  -2    1.17    0.20
  -7  -2  -2    8.25    0.41
  -7  -2  -2    8.11    0.32
   7  -2   2    7.95    0.30
   7   2   2    7.59    0.36
  -7   2  -2    8.06    0.46
  -7   2  -2    8.27    0.41
   7   2   2    8.13    0.29
   8  -2   2   48.17    1.20
  -8  -2  -2   48.49    1.34
   8   2   2   48.70    1.39
  -8   2  -2   45.72    1.46
  -8   2  -2   45.54    1.33
  -9  -2  -2    1.59    0.28
   9  -2   2    1.79    0.17
  -9   2  -2    1.80    0.28
  -9   2  -2    1.53    0.32
   9   2   2    1.95    0.25
 -10  -2  -2   13.80    0.61
 -10   2  -2   14.14    0.60
  10   2   2   14.31    0.59
 -11  -2  -2   -0.06    0.27
  11  -2   2    0.07    0.22
  11   2   2   -0.15    0.22
  12   2   2    4.56    0.42
 -11  -3   2   -0.07    0.24
 -11   3   2    0.32    0.32
  10  -3  -2    7.25    0.35
 -10  -3   2    7.61    0.44
 -10   3   2    7.24    0.52
  10   3  -2    7.46    0.41
  -9  -3   2    2.59    0.24
   9  -3  -2    2.95    0.24
  -9  -3   2    2.79    0.28
  -9   3   2    2.95    0.35
   9   3  -2    3.08    0.26
   8  -3  -2   10.21    0.38
  -8  -3   2    9.88    0.46
  -8  -3   2   10.14    0.41
  -8   3   2   10.24    0.52
  -8   3   2   10.95    0.46
   8   3  -2    9.48    0.42
   7  -3  -2    4.06    0.25
  -7  -3   2    4.69    0.27
  -7  -3   2    4.56    0.23
   7  -3  -2    3.60    0.25
  -7  -3   2    4.07    0.31
  -7   3   2    3.99    0.32
  -7   3   2    3.79    0.32
   7   3  -2    3.93    0.28
  -6  -3   2    2.65    0.22
  -6  -3   2    2.24    0.20
   6  -3  -2    2.52    0.21
   6  -3  -2    2.24    0.20
  -6  -3   2    2.24    0.18
  -6   3   2    2.58    0.25
  -6   3   2    2.42    0.21
  -5  -3   2    2.68    0.19
  -5  -3   2    2.46    0.20
  -5  -3   2    2.78    0.17
   5  -3  -2    2.41    0.18
  -5   3   2    2.48    0.22
  -5   3   2    2.61    0.23
  -4  -3   2    2.77    0.17
  -4  -3   2    2.83    0.19
  -4  -3   2    2.88    0.23
   4  -3  -2    2.98    0.17
  -4   3   2    2.60    0.24
  -4   3   2    2.74    0.23
   3  -3  -2   44.01    1.16
  -3  -3   2   45.12    1.18
  -3  -3   2   45.61    1.06
  -3  -3   2   46.22    1.15
  -3   3   2   44.26    1.08
   3   3  -2   43.79    1.21
  -3   3   2   44.72    1.14
  -3   3   2   43.38    1.24
   2  -3  -2   48.02    1.24
  -2  -3   2   48.98    1.13
  -2  -3   2   48.48    1.25
  -2   3   2   49.36    1.20
  -2   3   2   49.05    1.31
   2   3  -2   45.72    1.20
  -2   3   2   48.59    1.15
   2   3  -2   46.66    1.28
  -1  -3   2    2.28    0.10
  -1  -3   2    1.87    0.13
   1  -3  -2    2.21    0.14
  -1   3   2    1.95    0.14
   1   3  -2    2.16    0.12
  -1   3   2    1.99    0.16
   1   3  -2    2.51    0.08
  -1   3   2    2.34    0.10
   0  -3  -2   31.13    0.73
   0  -3  -2   30.92    0.81
   0  -3   2   30.93    0.80
   0  -3   2   30.18    0.73
   0   3  -2   32.19    0.83
   0   3   2   31.31    0.83
   0   3   2   30.02    0.77
   0   3  -2   32.85    0.78
   1  -3   2    0.09    0.06
  -1  -3  -2    0.00    0.10
  -1  -3  -2   -0.09    0.07
   1  -3   2    0.00    0.04
  -1   3  -2    0.01    0.08
  -1   3  -2    0.03    0.10
   1   3   2    0.16    0.06
   2  -3   2    0.23    0.06
  -2  -3  -2    0.12    0.10
   2  -3   2    0.08    0.04
  -2  -3  -2    0.14    0.07
  -2  -3  -2    0.16    0.04
  -2   3  -2    0.14    0.09
  -2   3  -2    0.05    0.11
   2   3   2    0.24    0.07
  -3  -3  -2    3.54    0.25
   3  -3   2    3.60    0.13
   3  -3   2    3.70    0.16
  -3  -3  -2    3.71    0.17
  -3  -3  -2    3.75    0.14
  -3   3  -2    3.11    0.24
   3   3   2    3.35    0.19
  -3   3  -2    3.82    0.23
  -4  -3  -2    6.84    0.32
   4  -3   2    6.41    0.23
   4  -3   2    6.26    0.22
  -4  -3  -2    6.49    0.26
   4   3   2    6.82    0.28
  -4   3  -2    6.44    0.34
  -4   3  -2    6.01    0.31
  -5  -3  -2    1.27    0.13
   5  -3   2    1.36    0.12
   5  -3   2    1.15    0.11
  -5  -3  -2    1.42    0.18
  -5   3  -2    1.20    0.20
   5   3   2    1.36    0.10
  -5   3  -2    1.49    0.18
   5   3   2    1.27    0.14
  -6  -3  -2    1.41    0.20
   6  -3   2    1.04    0.13
  -6  -3  -2    1.34    0.15
   6  -3   2    1.44    0.13
  -6   3  -2    1.14    0.20
   6   3   2    1.60    0.12
   6   3   2    1.34    0.16
  -6   3  -2    1.08    0.22
   7  -3   2   10.61    0.37
  -7  -3  -2   11.36    0.40
  -7  -3  -2   11.20    0.47
   7   3   2   10.83    0.44
  -7   3  -2   10.83    0.46
  -7   3  -2   10.37    0.52
   7   3   2   11.69    0.35
   8  -3   2    8.33    0.33
  -8  -3  -2    8.25    0.44
  -8  -3  -2    8.55    0.36
  -8   3  -2    7.52    0.49
  -8   3  -2    7.58    0.44
   8   3   2    8.20    0.40
  -9  -3  -2    2.67    0.30
   9  -3   2    2.44    0.20
  -9   3  -2    2.27    0.30
  -9   3  -2    2.42    0.34
   9   3   2    2.53    0.26
 -10  -3  -2    0.38    0.26
 -10   3  -2    0.31    0.26
 -10   3  -2   -0.11    0.29
  10   3   2   -0.07    0.19
 -11  -3  -2    0.67    0.29
  11   3   2    0.48    0.24
 -12  -3  -2    9.81    0.56
 -11  -4   2    0.97    0.28
 -11   4   2    0.51    0.33
 -10  -4   2    0.41    0.23
  10  -4  -2    0.12    0.16
 -10   4   2    0.08    0.28
  -9  -4   2    0.64    0.23
  -9  -4   2    0.73    0.19
   9  -4  -2    0.43    0.16
   9   4  -2    0.74    0.19
  -9   4   2    0.72    0.28
  -8  -4   2    1.10    0.19
  -8  -4   2    1.04    0.22
   8  -4  -2    0.83    0.16
   8   4  -2    1.16    0.18
  -8   4   2    0.91    0.26
  -8   4   2    1.28    0.23
   7  -4  -2   53.45    1.38
  -7  -4   2   55.22    1.49
   7  -4  -2   54.07    1.47
  -7  -4   2   54.73    1.50
  -7  -4   2   58.21    1.36
  -7   4   2   54.02    1.63
   7   4  -2   55.54    1.55
  -7   4   2   56.73    1.48
  -6  -4   2   40.00    1.10
   6  -4  -2   39.54    1.01
  -6  -4   2   39.33    1.09
   6  -4  -2   38.21    1.06
  -6  -4   2   40.53    0.98
   6   4  -2   38.93    1.12
  -6   4   2   41.06    1.08
  -6   4   2   37.80    1.19
  -5  -4   2    0.62    0.13
   5  -4  -2    0.59    0.11
  -5  -4   2    0.56    0.14
  -5  -4   2    0.57    0.09
   5  -4  -2    0.45    0.10
  -5   4   2    0.58    0.17
  -5   4   2    0.65    0.14
   5   4  -2    0.68    0.11
   4  -4  -2    0.60    0.11
   4  -4  -2    0.41    0.10
  -4  -4   2    0.72    0.14
  -4  -4   2    0.73    0.09
  -4  -4   2    0.60    0.12
  -4   4   2    0.54    0.15
  -4   4   2    0.74    0.13
   4   4  -2    0.61    0.09
   3  -4  -2   16.80    0.47
  -3  -4   2   16.90    0.50
  -3  -4   2   17.10    0.43
   3  -4  -2   17.55    0.46
  -3  -4   2   16.69    0.50
  -3   4   2   17.35    0.54
   3   4  -2   16.53    0.49
  -3   4   2   17.25    0.48
  -2  -4   2   39.52    0.94
   2  -4  -2   39.90    0.96
   2  -4  -2   39.47    1.03
  -2  -4   2   40.74    1.05
   2   4  -2   40.65    1.01
  -2   4   2   39.89    1.00
   2   4  -2   40.19    1.06
  -2   4   2   38.55    1.10
  -1  -4   2    1.44    0.13
   1  -4  -2    1.30    0.09
  -1  -4   2    1.42    0.09
   1  -4  -2    1.53    0.11
  -1   4   2    1.62    0.09
  -1   4   2    1.26    0.10
   1   4  -2    1.58    0.12
   1   4  -2    1.76    0.07
   0  -4   2    1.32    0.12
   0  -4  -2    1.25    0.09
   0  -4   2    1.26    0.09
   0  -4  -2    1.33    0.09
   0   4  -2    1.12    0.08
   0   4   2    1.33    0.10
   0   4  -2    1.34    0.11
   0   4   2    1.36    0.11
   1  -4   2   29.01    0.70
  -1  -4  -2   29.58    0.76
   1  -4   2   28.23    0.75
  -1  -4  -2   28.98    0.77
  -1  -4  -2   28.96    0.68
   1   4   2   28.61    0.78
  -1   4  -2   29.42    0.81
  -1   4  -2   30.58    0.74
   2  -4   2    0.55    0.07
  -2  -4  -2    0.62    0.09
   2  -4   2    0.59    0.05
  -2  -4  -2    0.56    0.12
   2   4   2    0.79    0.08
  -2   4  -2    0.42    0.12
  -2   4  -2    0.47    0.10
  -3  -4  -2    6.06    0.17
   3  -4   2    5.26    0.18
  -3  -4  -2    6.04    0.28
   3  -4   2    5.70    0.21
  -3  -4  -2    5.73    0.23
   3   4   2    6.08    0.23
  -3   4  -2    5.38    0.29
  -3   4  -2    5.70    0.26
   4  -4   2   97.82    2.31
   4  -4   2   95.51    2.49
  -4  -4  -2  101.57    2.48
  -4  -4  -2  101.43    2.29
  -4  -4  -2   98.82    2.52
  -4   4  -2   96.98    2.46
  -4   4  -2   95.57    2.67
   4   4   2   97.87    2.62
   5  -4   2    0.29    0.09
   5  -4   2   -0.04    0.08
  -5  -4  -2    0.09    0.14
  -5  -4  -2    0.25    0.11
  -5   4  -2    0.41    0.15
   5   4   2    0.27    0.11
  -5   4  -2    0.36    0.17
  -6  -4  -2    0.41    0.18
  -6  -4  -2    0.45    0.13
   6  -4   2    0.30    0.11
   6   4   2    0.30    0.08
   6   4   2    0.24    0.13
  -6   4  -2    0.37    0.18
  -6   4  -2    0.47    0.20
  -7  -4  -2    1.61    0.18
  -7  -4  -2    1.62    0.24
   7  -4   2    1.68    0.16
  -7   4  -2    1.72    0.27
   7   4   2    1.57    0.19
  -7   4  -2    1.64    0.24
  -8  -4  -2    2.00    0.27
  -8  -4  -2    2.21    0.21
   8  -4   2    2.08    0.18
  -8   4  -2    2.41    0.32
   8   4   2    2.01    0.22
  -8   4  -2    1.76    0.26
  -9  -4  -2   -0.19    0.22
   9  -4   2    0.17    0.14
   9   4   2   -0.09    0.17
  -9   4  -2   -0.19    0.23
  -9   4  -2   -0.04    0.27
 -10  -4  -2    4.68    0.40
  10  -4   2    5.54    0.30
 -10   4  -2    4.98    0.47
  10   4   2    5.86    0.37
 -11  -4  -2    2.75    0.34
 -11   4  -2    2.57    0.43
  11   4   2    2.99    0.31
  11  -5  -2    1.34    0.21
 -11   5   2    0.94    0.35
  10  -5  -2    0.23    0.18
 -10  -5   2    0.32    0.24
 -10   5   2    0.51    0.30
  -9  -5   2    4.19    0.35
   9  -5  -2    4.20    0.27
  -9  -5   2    4.59    0.31
  -9   5   2    3.38    0.37
   9   5  -2    4.47    0.31
  -8  -5   2    0.88    0.18
  -8  -5   2    0.80    0.22
   8  -5  -2    0.97    0.16
   8   5  -2    0.60    0.16
  -8   5   2    1.12    0.27
  -7  -5   2    0.04    0.11
  -7  -5   2    0.19    0.15
   7  -5  -2    0.03    0.13
  -7  -5   2    0.05    0.18
  -7   5   2    0.25    0.18
  -7   5   2    0.21    0.21
   7   5  -2    0.09    0.12
   6  -5  -2    1.18    0.15
  -6  -5   2    1.31    0.12
   6  -5  -2    1.38    0.15
  -6  -5   2    1.42    0.19
  -6  -5   2    1.42    0.17
  -6   5   2    1.26    0.21
   6   5  -2    1.25    0.14
  -6   5   2    1.13    0.17
  -5  -5   2    3.83    0.18
   5  -5  -2    3.18    0.21
  -5  -5   2    3.50    0.22
   5  -5  -2    3.52    0.18
  -5  -5   2    3.34    0.24
  -5   5   2    3.01    0.27
  -5   5   2    3.29    0.24
   5   5  -2    3.38    0.20
  -4  -5   2    2.59    0.15
   4  -5  -2    3.02    0.19
  -4  -5   2    2.48    0.19
   4  -5  -2    2.73    0.16
  -4  -5   2    2.71    0.22
  -4   5   2    2.57    0.21
  -4   5   2    2.88    0.22
   4   5  -2    2.59    0.16
   3  -5  -2    0.19    0.09
   3  -5  -2    0.06    0.08
  -3  -5   2    0.05    0.06
  -3  -5   2   -0.01    0.10
  -3   5   2    0.19    0.12
   3   5  -2    0.19    0.09
   3   5  -2    0.04    0.06
  -3   5   2    0.18    0.10
  -2  -5   2   46.13    1.11
   2  -5  -2   48.65    1.22
  -2  -5   2   46.67    1.24
   2  -5  -2   47.32    1.13
  -2   5   2   47.53    1.29
   2   5  -2   47.20    1.19
   2   5  -2   45.95    1.25
  -2   5   2   48.65    1.18
  -1  -5   2    1.54    0.12
   1  -5  -2    1.62    0.13
   1  -5  -2    1.61    0.11
  -1  -5   2    1.81    0.09
   1   5  -2    2.04    0.08
   1   5  -2    2.02    0.12
  -1   5   2    1.71    0.10
  -1   5   2    1.44    0.14
   0  -5   2    7.82    0.21
   0  -5   2    7.89    0.25
   0  -5  -2    8.03    0.22
   0  -5  -2    7.46    0.25
   0   5  -2    8.15    0.25
   0   5   2    8.14    0.25
   0   5  -2    8.48    0.24
   0   5   2    7.75    0.23
  -1  -5  -2   12.90    0.38
  -1  -5  -2   13.54    0.31
  -1  -5  -2   12.53    0.37
   1  -5   2   12.71    0.34
   1  -5   2   12.88    0.35
   1   5   2   13.49    0.36
  -1   5  -2   12.73    0.36
  -1   5  -2   12.43    0.40
   2  -5   2    8.92    0.25
  -2  -5  -2    8.78    0.28
  -2  -5  -2    9.31    0.22
   2  -5   2    8.48    0.26
  -2  -5  -2    9.09    0.31
  -2   5  -2    8.48    0.34
   2   5   2    8.83    0.27
  -2   5  -2    8.71    0.29
  -3  -5  -2    2.16    0.10
   3  -5   2    2.33    0.15
  -3  -5  -2    2.32    0.17
   3  -5   2    2.29    0.11
  -3  -5  -2    2.48    0.18
  -3   5  -2    2.54    0.23
  -3   5  -2    2.59    0.20
   3   5   2    2.15    0.15
   4  -5   2    0.79    0.09
   4  -5   2    0.97    0.11
  -4  -5  -2    0.94    0.17
  -4  -5  -2    1.03    0.07
  -4  -5  -2    0.84    0.12
  -4   5  -2    0.98    0.15
  -4   5  -2    1.18    0.18
   4   5   2    1.05    0.11
  -5  -5  -2    4.01    0.27
   5  -5   2    3.43    0.16
   5  -5   2    3.22    0.19
  -5  -5  -2    3.20    0.20
   5   5   2    3.42    0.21
  -5   5  -2    3.10    0.29
  -5   5  -2    3.67    0.27
   6  -5   2    0.69    0.12
  -6  -5  -2    1.00    0.20
  -6  -5  -2    0.94    0.16
  -6   5  -2    1.00    0.22
  -6   5  -2    0.82    0.19
   6   5   2    1.00    0.10
   6   5   2    1.08    0.15
  -7  -5  -2    1.00    0.17
  -7  -5  -2    1.20    0.22
   7  -5   2    1.03    0.14
   7   5   2    0.87    0.16
  -7   5  -2    1.28    0.23
  -7   5  -2    1.24    0.26
   8  -5   2    2.37    0.19
  -8  -5  -2    2.09    0.28
  -8  -5  -2    2.38    0.23
  -8   5  -2    1.75    0.26
  -8   5  -2    2.04    0.31
   8   5   2    2.50    0.23
   9  -5   2    5.10    0.27
  -9  -5  -2    5.32    0.39
   9   5   2    4.59    0.33
  -9   5  -2    4.87    0.41
  -9   5  -2    4.59    0.42
  10  -5   2    0.13    0.15
 -10  -5  -2    0.11    0.24
 -10   5  -2   -0.21    0.28
  10   5   2   -0.21    0.19
 -11  -5  -2    4.28    0.40
 -11   5  -2    3.84    0.47
  11   5   2    4.11    0.36
  11  -6  -2    0.89    0.20
 -11   6   2    0.00    0.32
  10  -6  -2    1.21    0.20
 -10   6   2    1.33    0.33
  -9  -6   2    0.22    0.22
  -9  -6   2    0.00    0.17
   9  -6  -2    0.16    0.15
  -9   6   2   -0.24    0.26
  -8  -6   2   -0.03    0.20
  -8  -6   2   -0.04    0.17
   8  -6  -2    0.12    0.14
  -8   6   2    0.22    0.24
   8   6  -2    0.22    0.14
  -7  -6   2   19.09    0.65
  -7  -6   2   19.44    0.62
   7  -6  -2   19.49    0.58
  -7   6   2   18.72    0.71
   7   6  -2   19.10    0.62
  -7   6   2   19.67    0.63
  -6  -6   2   12.40    0.45
  -6  -6   2   11.75    0.36
   6  -6  -2   12.14    0.39
  -6  -6   2   11.25    0.42
   6  -6  -2   11.60    0.39
  -6   6   2   12.22    0.44
  -6   6   2   10.93    0.50
   6   6  -2   11.07    0.40
  -5  -6   2    0.77    0.09
   5  -6  -2    0.57    0.12
  -5  -6   2    0.72    0.16
   5  -6  -2    0.53    0.11
  -5  -6   2    0.71    0.14
  -5   6   2    0.74    0.17
   5   6  -2    0.64    0.10
  -5   6   2    0.76    0.15
  -4  -6   2    5.40    0.19
   4  -6  -2    5.57    0.22
   4  -6  -2    4.86    0.22
  -4  -6   2    5.00    0.23
  -4   6   2    5.35    0.26
   4   6  -2    5.22    0.21
  -4   6   2    5.11    0.30
  -3  -6   2   20.04    0.49
   3  -6  -2   19.35    0.55
  -3  -6   2   19.79    0.57
   3  -6  -2   19.85    0.53
  -3   6   2   19.13    0.61
   3   6  -2   20.14    0.55
  -3   6   2   19.36    0.54
   3   6  -2   19.69    0.55
  -2  -6   2   18.50    0.47
   2  -6  -2   19.67    0.53
  -2  -6   2   18.64    0.55
   2  -6  -2   18.86    0.50
   2   6  -2   19.34    0.52
   2   6  -2   18.97    0.51
  -2   6   2   20.12    0.50
  -2   6   2   18.87    0.57
  -1  -6   2   39.53    0.92
   1  -6  -2   37.66    1.02
  -1  -6   2   38.73    1.04
   1  -6  -2   38.73    0.94
  -1   6   2   39.45    1.07
   1   6  -2   41.41    1.04
  -1   6   2   39.97    0.98
   1   6  -2   39.22    0.99
   0  -6  -2    8.36    0.23
   0  -6   2    7.86    0.26
   0  -6   2    7.89    0.22
   0  -6  -2    8.17    0.27
   0   6   2    8.56    0.26
   0   6   2    8.54    0.24
   0   6  -2    8.51    0.24
   0   6  -2    8.05    0.26
   1  -6   2   17.29    0.45
  -1  -6  -2   17.80    0.50
  -1  -6  -2   18.09    0.43
   1  -6   2   17.93    0.48
  -1   6  -2   18.75    0.48
   1   6   2   17.20    0.48
   1   6   2   18.01    0.49
  -1   6  -2   17.73    0.53
  -2  -6  -2    5.07    0.14
   2  -6   2    5.26    0.19
  -2  -6  -2    5.17    0.25
   2  -6   2    5.59    0.17
  -2  -6  -2    5.11    0.22
   2   6   2    5.13    0.19
  -2   6  -2    5.29    0.25
  -2   6  -2    5.57    0.21
  -3  -6  -2   52.20    1.35
  -3  -6  -2   50.65    1.37
   3  -6   2   52.67    1.25
   3  -6   2   51.68    1.32
  -3  -6  -2   53.07    1.21
  -3   6  -2   53.31    1.33
   3   6   2   50.86    1.40
  -3   6  -2   50.90    1.45
  -4  -6  -2    1.93    0.17
   4  -6   2    1.61    0.13
   4  -6   2    1.62    0.13
  -4  -6  -2    2.23    0.19
  -4  -6  -2    2.08    0.11
  -4   6  -2    2.18    0.17
  -4   6  -2    1.96    0.21
   4   6   2    2.30    0.17
   5  -6   2    0.14    0.10
  -5  -6  -2    0.28    0.07
  -5  -6  -2    0.28    0.12
   5  -6   2    0.06    0.08
  -5  -6  -2    0.21    0.15
   5   6   2    0.26    0.10
  -5   6  -2    0.21    0.17
  -5   6  -2    0.31    0.15
  -6  -6  -2    2.13    0.23
   6  -6   2    1.66    0.15
  -6  -6  -2    1.86    0.18
  -6   6  -2    2.23    0.22
  -6   6  -2    2.40    0.26
   6   6   2    2.08    0.17
   7  -6   2    0.32    0.13
  -7  -6  -2    0.54    0.20
  -7  -6  -2    0.23    0.15
   7   6   2    0.32    0.14
  -7   6  -2    0.47    0.21
  -7   6  -2    0.35    0.23
  -8  -6  -2    1.22    0.19
  -8  -6  -2    0.96    0.24
   8  -6   2    0.80    0.15
  -8   6  -2    1.30    0.29
  -8   6  -2    1.31    0.26
   8   6   2    1.06    0.18
   9  -6   2    2.40    0.21
  -9  -6  -2    2.59    0.30
  -9  -6  -2    2.70    0.25
   9   6   2    2.46    0.24
  -9   6  -2    2.46    0.36
 -10  -6  -2    0.63    0.26
  10  -6   2    0.12    0.16
  10   6   2    0.12    0.19
 -10   6  -2    0.52    0.32
 -11  -6  -2    0.38    0.27
 -11   6  -2    0.45    0.36
  11  -7  -2    2.18    0.25
 -11   7   2    1.80    0.40
  11   7  -2    2.12    0.26
 -10  -7   2    8.35    0.41
  10  -7  -2    8.09    0.38
  10   7  -2    8.76    0.40
 -10   7   2    7.07    0.54
   9  -7  -2    0.28    0.16
  -9  -7   2    0.47    0.19
  -9   7   2    0.32    0.28
   8  -7  -2    2.67    0.22
  -8  -7   2    2.94    0.26
   8   7  -2    2.46    0.23
  -8   7   2    2.34    0.32
  -7  -7   2    1.68    0.21
   7  -7  -2    1.78    0.18
  -7   7   2    1.44    0.27
   7   7  -2    1.74    0.17
   6  -7  -2    0.50    0.13
   6  -7  -2    0.56    0.13
  -6  -7   2    0.71    0.15
  -6  -7   2    0.55    0.10
  -6   7   2    0.40    0.20
  -6   7   2    0.53    0.16
   6   7  -2    0.61    0.11
   5  -7  -2   30.78    0.85
  -5  -7   2   32.55    0.78
   5  -7  -2   31.02    0.82
  -5  -7   2   31.14    0.89
   5   7  -2   31.35    0.88
  -5   7   2   31.75    0.86
  -5   7   2   30.34    0.96
   4  -7  -2    1.35    0.13
   4  -7  -2    1.12    0.13
  -4  -7   2    1.06    0.09
  -4  -7   2    1.07    0.14
  -4   7   2    1.19    0.17
   4   7  -2    1.09    0.10
   4   7  -2    1.02    0.12
  -4   7   2    1.26    0.14
   3  -7  -2    7.20    0.25
  -3  -7   2    6.69    0.21
  -3  -7   2    6.51    0.28
   3  -7  -2    7.03    0.25
  -3   7   2    6.65    0.25
  -3   7   2    6.67    0.30
   3   7  -2    6.93    0.26
   3   7  -2    7.11    0.23
  -2  -7   2   18.30    0.45
  -2  -7   2   18.18    0.54
   2  -7  -2   18.45    0.49
   2  -7  -2   18.98    0.52
  -2   7   2   18.47    0.56
   2   7  -2   18.42    0.50
   2   7  -2   17.75    0.50
  -2   7   2   18.92    0.49
   1  -7  -2    0.00    0.09
  -1  -7   2    0.13    0.04
  -1  -7   2    0.09    0.09
   1  -7  -2    0.04    0.07
   1   7  -2    0.11    0.06
  -1   7   2    0.08    0.08
   1   7  -2    0.19    0.05
  -1   7   2    0.02    0.05
   0  -7  -2   66.50    1.72
   0  -7  -2   66.85    1.57
   0  -7   2   66.16    1.57
   0  -7   2   65.40    1.72
   0   7  -2   68.54    1.78
   0   7   2   65.25    1.65
   0   7  -2   68.80    1.66
   0   7   2   68.76    1.78
   1  -7   2    2.18    0.13
   1  -7   2    2.05    0.13
  -1  -7  -2    2.13    0.16
  -1  -7  -2    2.10    0.09
   1   7   2    2.04    0.13
  -1   7  -2    2.04    0.14
  -1   7  -2    2.16    0.17
   1   7   2    2.24    0.12
   2  -7   2   36.62    0.95
   2  -7   2   35.55    0.89
  -2  -7  -2   36.53    0.98
  -2  -7  -2   37.61    0.85
   2   7   2   37.38    0.99
  -2   7  -2   36.10    1.04
  -2   7  -2   36.51    0.94
  -3  -7  -2    2.18    0.18
  -3  -7  -2    2.30    0.18
   3  -7   2    2.36    0.12
  -3  -7  -2    2.24    0.10
   3  -7   2    2.05    0.15
   3   7   2    2.36    0.14
  -3   7  -2    2.23    0.16
  -3   7  -2    2.17    0.20
   4  -7   2   23.29    0.61
  -4  -7  -2   22.93    0.67
  -4  -7  -2   22.74    0.69
  -4  -7  -2   23.74    0.56
   4  -7   2   23.82    0.62
  -4   7  -2   23.40    0.67
  -4   7  -2   22.89    0.75
   4   7   2   23.36    0.67
  -5  -7  -2   23.22    0.69
   5  -7   2   24.16    0.63
  -5  -7  -2   23.02    0.71
  -5   7  -2   24.43    0.70
  -5   7  -2   22.59    0.77
   5   7   2   23.28    0.69
  -6  -7  -2    2.04    0.19
  -6  -7  -2    1.77    0.22
   6  -7   2    1.68    0.16
  -6   7  -2    1.87    0.21
  -6   7  -2    1.85    0.25
   6   7   2    1.70    0.16
   7  -7   2    0.77    0.14
  -7  -7  -2    0.90    0.17
  -7  -7  -2    0.97    0.22
   7   7   2    0.65    0.15
  -7   7  -2    0.64    0.22
  -7   7  -2    0.77    0.25
  -8  -7  -2    0.43    0.17
  -8  -7  -2    0.09    0.21
   8  -7   2    0.40    0.14
  -8   7  -2    0.04    0.25
  -8   7  -2    0.13    0.22
   8   7   2    0.24    0.15
  -9  -7  -2    2.38    0.29
  -9  -7  -2    2.96    0.27
   9  -7   2    2.30    0.21
   9   7   2    2.50    0.23
  -9   7  -2    2.53    0.36
  10  -7   2    2.36    0.22
 -10  -7  -2    2.32    0.32
  10   7   2    2.45    0.26
 -10   7  -2    2.05    0.38
 -11  -7  -2    0.67    0.29
  11  -7   2    0.25    0.18
 -11   7  -2    0.35    0.35
  11  -8  -2    0.77    0.21
  11   8  -2    0.59    0.22
 -11   8   2    0.52    0.35
  10  -8  -2    1.12    0.20
 -10  -8   2    1.12    0.24
  10   8  -2    1.38    0.22
 -10   8   2    1.44    0.35
  -9  -8   2    0.07    0.19
   9  -8  -2   -0.11    0.15
  -9   8   2    0.11    0.27
   9   8  -2   -0.04    0.16
   8  -8  -2    0.02    0.15
  -8  -8   2    0.14    0.18
  -8   8   2    0.20    0.24
   8   8  -2    0.23    0.16
  -7  -8   2    0.22    0.16
   7  -8  -2    0.11    0.14
   7   8  -2    0.05    0.11
  -7   8   2    0.09    0.22
   7   8  -2    0.06    0.14
  -6  -8   2    1.63    0.19
   6  -8  -2    1.80    0.17
   6   8  -2    1.74    0.17
   6   8  -2    1.57    0.14
  -6   8   2    1.94    0.25
  -6   8   2    2.15    0.21
   5  -8  -2    0.52    0.12
  -5  -8   2    0.48    0.09
   5  -8  -2    0.27    0.12
  -5  -8   2    0.51    0.14
  -5   8   2    0.52    0.14
   5   8  -2    0.51    0.09
  -5   8   2    0.44    0.17
   5   8  -2    0.53    0.13
  -4  -8   2   21.54    0.63
   4  -8  -2   21.48    0.60
   4  -8  -2   21.23    0.58
  -4  -8   2   21.17    0.53
   4   8  -2   21.29    0.60
  -4   8   2   20.54    0.68
  -4   8   2   21.20    0.59
   4   8  -2   21.08    0.60
  -3  -8   2   20.15    0.59
   3  -8  -2   20.42    0.57
   3  -8  -2   19.73    0.54
  -3  -8   2   20.24    0.50
  -3   8   2   20.01    0.55
  -3   8   2   19.74    0.63
   3   8  -2   20.56    0.56
   3   8  -2   20.44    0.56
  -2  -8   2    0.22    0.11
   2  -8  -2    0.13    0.09
   2  -8  -2    0.03    0.08
  -2  -8   2    0.27    0.05
   2   8  -2    0.15    0.08
   2   8  -2    0.27    0.06
  -2   8   2    0.17    0.08
  -2   8   2    0.10    0.11
  -1  -8   2   14.82    0.36
  -1  -8   2   13.72    0.43
   1  -8  -2   14.44    0.43
   1  -8  -2   14.57    0.39
   1   8  -2   14.72    0.41
  -1   8   2   14.21    0.39
  -1   8   2   14.20    0.45
   1   8  -2   14.67    0.40
   0  -8  -2   20.38    0.50
   0  -8   2   19.67    0.57
   0  -8  -2   19.85    0.57
   0  -8   2   19.80    0.50
   0   8   2   21.15    0.57
   0   8  -2   20.48    0.53
   0   8  -2   20.21    0.58
   0   8   2   20.22    0.53
   1  -8   2    5.10    0.18
   1  -8   2    4.87    0.20
  -1  -8  -2    5.23    0.15
  -1  -8  -2    5.18    0.22
  -1   8  -2    5.28    0.19
   1   8   2    4.83    0.19
   1   8   2    5.11    0.18
  -1   8  -2    4.58    0.23
  -2  -8  -2    8.56    0.31
  -2  -8  -2    8.89    0.23
   2  -8   2    9.21    0.27
   2  -8   2    9.56    0.28
  -2   8  -2    8.78    0.35
  -2   8  -2    8.98    0.30
   2   8   2    8.17    0.29
   2   8   2    8.81    0.28
  -3  -8  -2    2.55    0.22
  -3  -8  -2    2.63    0.19
  -3  -8  -2    2.61    0.10
   3  -8   2    2.66    0.16
   3  -8   2    2.77    0.13
  -3   8  -2    2.55    0.21
  -3   8  -2    2.53    0.21
   3   8   2    2.81    0.15
  -4  -8  -2    4.15    0.26
  -4  -8  -2    3.92    0.23
   4  -8   2    4.27    0.16
  -4  -8  -2    4.30    0.14
   4  -8   2    3.87    0.20
  -4   8  -2    4.28    0.29
  -4   8  -2    3.99    0.25
   4   8   2    4.10    0.20
   5  -8   2    3.49    0.20
  -5  -8  -2    3.90    0.28
  -5  -8  -2    3.72    0.23
   5   8   2    3.61    0.21
  -5   8  -2    3.51    0.32
  -5   8  -2    3.82    0.27
  -6  -8  -2    0.28    0.18
   6  -8   2    0.26    0.12
  -6  -8  -2    0.15    0.14
  -6   8  -2    0.09    0.18
   6   8   2    0.29    0.12
  -6   8  -2    0.06    0.20
  -7  -8  -2   22.11    0.73
  -7  -8  -2   21.07    0.69
   7  -8   2   21.84    0.62
  -7   8  -2   21.60    0.81
   7   8   2   21.85    0.68
  -7   8  -2   23.00    0.72
  -8  -8  -2    0.40    0.19
   8  -8   2    0.32    0.14
  -8  -8  -2    0.67    0.23
   8   8   2    0.43    0.15
  -8   8  -2    0.29    0.27
   9  -8   2    1.99    0.20
  -9  -8  -2    2.42    0.26
  -9  -8  -2    1.88    0.28
   9   8   2    2.36    0.23
  -9   8  -2    1.94    0.35
 -10  -8  -2    6.04    0.44
  10  -8   2    6.83    0.33
 -10   8  -2    6.11    0.54
 -11  -8  -2    0.95    0.30
  11  -8   2    0.60    0.20
 -11   8  -2    1.00    0.38
  11  -9  -2    0.14    0.19
 -11   9   2   -0.24    0.33
  11   9  -2    0.25    0.20
 -10  -9   2    3.49    0.32
  10  -9  -2    4.16    0.30
 -10   9   2    3.57    0.43
  10   9  -2    3.88    0.31
   9  -9  -2   22.59    0.69
  -9  -9   2   22.90    0.75
   9   9  -2   23.23    0.72
  -9   9   2   21.60    0.88
  -8  -9   2    0.15    0.18
   8  -9  -2    0.29    0.16
  -8   9   2    0.30    0.26
   8   9  -2    0.57    0.17
   7  -9  -2    1.85    0.20
  -7  -9   2    1.87    0.22
   7   9  -2    2.04    0.20
  -7   9   2    1.88    0.29
   7   9  -2    2.14    0.20
   6  -9  -2    3.04    0.22
  -6  -9   2    2.90    0.25
   6   9  -2    2.88    0.23
   6   9  -2    2.80    0.19
  -6   9   2    3.13    0.30
  -5  -9   2    0.49    0.09
  -5  -9   2    0.57    0.15
   5  -9  -2    0.39    0.12
   5  -9  -2    0.72    0.13
   5   9  -2    0.52    0.09
   5   9  -2    0.39    0.12
  -5   9   2    0.33    0.15
  -5   9   2    0.61    0.18
   4  -9  -2   86.16    2.21
   4  -9  -2   84.20    2.05
  -4  -9   2   88.87    2.01
  -4  -9   2   84.49    2.25
   4   9  -2   86.37    2.28
  -4   9   2   86.14    2.15
   4   9  -2   86.52    2.16
  -4   9   2   83.98    2.36
   3  -9  -2    2.92    0.18
   3  -9  -2    2.80    0.18
  -3  -9   2    2.94    0.13
  -3  -9   2    2.98    0.21
   3   9  -2    2.86    0.17
   3   9  -2    2.53    0.13
  -3   9   2    3.09    0.23
  -3   9   2    3.04    0.18
   2  -9  -2    9.55    0.30
   2  -9  -2    9.25    0.31
  -2  -9   2    9.38    0.25
  -2  -9   2    9.21    0.32
  -2   9   2    9.42    0.29
   2   9  -2    9.12    0.30
   2   9  -2    9.91    0.28
  -2   9   2    8.99    0.35
   1  -9  -2    0.14    0.08
   1  -9  -2    0.14    0.09
  -1  -9   2   -0.09    0.10
  -1  -9   2    0.07    0.05
  -1   9   2    0.16    0.10
   1   9  -2    0.02    0.07
  -1   9   2    0.13    0.07
   1   9  -2    0.02    0.07
   0  -9   2  148.07    3.74
   0  -9   2  145.63    3.41
   0  -9  -2  147.88    3.41
   0  -9  -2  145.21    3.74
   0   9  -2  152.42    3.61
   0   9   2  145.91    3.88
   0   9   2  148.31    3.60
   0   9  -2  144.99    3.88
  -1  -9  -2   24.41    0.68
   1  -9   2   23.93    0.67
   1  -9   2   24.49    0.61
  -1  -9  -2   24.92    0.59
   1   9   2   24.86    0.68
  -1   9  -2   24.58    0.64
   1   9   2   24.56    0.64
  -1   9  -2   23.50    0.71
   2  -9   2    9.03    0.29
  -2  -9  -2    9.56    0.24
  -2  -9  -2    9.59    0.34
   2  -9   2    9.38    0.29
   2   9   2    9.84    0.29
  -2   9  -2    9.07    0.37
  -2   9  -2    9.49    0.31
   2   9   2    9.49    0.31
  -3  -9  -2    4.27    0.23
  -3  -9  -2    4.26    0.13
   3  -9   2    4.41    0.20
   3  -9   2    4.16    0.17
  -3   9  -2    4.09    0.28
   3   9   2    4.25    0.22
  -3   9  -2    4.43    0.23
   3   9   2    4.47    0.18
  -4  -9  -2    0.33    0.13
   4  -9   2    0.63    0.08
  -4  -9  -2    0.58    0.15
   4  -9   2    0.40    0.10
  -4   9  -2    0.52    0.14
  -4   9  -2    0.38    0.16
   4   9   2    0.48    0.09
   5  -9   2    8.11    0.30
  -5  -9  -2    7.45    0.37
  -5  -9  -2    7.87    0.33
   5   9   2    8.09    0.30
  -5   9  -2    8.14    0.41
  -5   9  -2    8.03    0.35
  -6  -9  -2    5.11    0.33
   6  -9   2    4.81    0.25
  -6  -9  -2    4.84    0.28
   6   9   2    4.75    0.25
  -6   9  -2    4.69    0.33
  -6   9  -2    4.84    0.36
  -7  -9  -2    6.14    0.32
  -7  -9  -2    5.68    0.37
   7  -9   2    5.46    0.28
   7   9   2    5.80    0.29
  -7   9  -2    5.81    0.43
  -7   9  -2    5.30    0.37
  -8  -9  -2    0.30    0.19
  -8  -9  -2    0.36    0.22
   8  -9   2    0.03    0.14
   8   9   2    0.02    0.14
  -8   9  -2    0.21    0.26
   9  -9   2    0.26    0.16
  -9  -9  -2    0.20    0.23
  -9  -9  -2    0.14    0.20
   9   9   2    0.11    0.16
  -9   9  -2    0.04    0.29
 -10  -9  -2    3.70    0.36
  10  -9   2    2.54    0.24
 -10   9  -2    2.94    0.42
  11  -9   2   -0.18    0.18
  11 -10  -2   -0.11    0.19
  11  10  -2    0.18    0.21
  10 -10  -2    0.24    0.19
 -10 -10   2    0.22    0.22
 -10  10   2    0.37    0.33
  10  10  -2    0.32    0.19
   9 -10  -2    0.29    0.17
  -9 -10   2    0.08    0.19
  -9  10   2   -0.05    0.28
   9  10  -2    0.30    0.18
   8 -10  -2    0.70    0.17
  -8 -10   2    0.64    0.20
   8  10  -2    0.66    0.17
  -8  10   2    0.73    0.28
   7 -10  -2    4.65    0.28
  -7 -10   2    4.82    0.31
  -7  10   2    4.52    0.39
   7  10  -2    5.14    0.29
  -6 -10   2    2.30    0.22
   6 -10  -2    2.50    0.20
  -6  10   2    2.28    0.28
   6  10  -2    1.84    0.17
   6  10  -2    1.94    0.19
   5 -10  -2   12.48    0.40
  -5 -10   2   12.36    0.44
   5 -10  -2   12.30    0.41
   5  10  -2   12.92    0.39
  -5  10   2   11.90    0.51
   5  10  -2   13.07    0.42
  -5  10   2   12.30    0.43
  -4 -10   2    7.36    0.31
   4 -10  -2    7.02    0.28
  -4 -10   2    7.80    0.24
   4 -10  -2    7.50    0.28
  -4  10   2    7.74    0.30
   4  10  -2    7.60    0.25
   4  10  -2    7.21    0.29
  -4  10   2    7.88    0.37
   3 -10  -2    2.02    0.17
   3 -10  -2    1.97    0.15
  -3 -10   2    2.01    0.17
  -3 -10   2    1.96    0.12
  -3  10   2    1.97    0.17
   3  10  -2    2.06    0.12
  -3  10   2    1.74    0.18
   3  10  -2    1.86    0.16
   2 -10  -2   20.53    0.55
  -2 -10   2   21.06    0.51
  -2 -10   2   20.71    0.62
   2 -10  -2   20.27    0.59
   2  10  -2   21.26    0.58
   2  10  -2   20.93    0.57
  -2  10   2   21.50    0.56
  -2  10   2   20.57    0.64
   1 -10  -2    2.63    0.17
  -1 -10   2    2.49    0.12
  -1 -10   2    2.67    0.18
   1 -10  -2    2.30    0.14
  -1  10   2    2.14    0.19
  -1  10   2    2.39    0.14
   1  10  -2    2.61    0.15
   1  10  -2    2.39    0.15
   0 -10  -2    0.11    0.06
   0 -10   2    0.05    0.09
   0 -10   2   -0.04    0.06
   0 -10  -2    0.16    0.10
   0  10   2    0.15    0.07
   0  10  -2   -0.04    0.09
   0  10  -2    0.05    0.08
   0  10   2    0.06    0.09
  -1 -10  -2   13.88    0.44
   1 -10   2   14.38    0.42
  -1 -10  -2   14.19    0.36
   1 -10   2   14.64    0.39
   1  10   2   13.26    0.40
  -1  10  -2   14.83    0.41
  -1  10  -2   14.50    0.46
   1  10   2   13.69    0.42
  -2 -10  -2   54.84    1.46
   2 -10   2   54.90    1.43
  -2 -10  -2   56.05    1.28
   2 -10   2   53.86    1.32
  -2  10  -2   53.56    1.52
   2  10   2   55.29    1.47
   2  10   2   56.44    1.40
  -2  10  -2   55.41    1.39
  -3 -10  -2    0.13    0.04
   3 -10   2    0.18    0.09
  -3 -10  -2    0.14    0.10
   3 -10   2    0.18    0.08
   3  10   2   -0.05    0.10
  -3  10  -2    0.27    0.12
  -3  10  -2    0.15    0.14
   3  10   2    0.12    0.07
  -4 -10  -2   18.54    0.58
   4 -10   2   18.58    0.51
   4 -10   2   18.35    0.52
   4  10   2   18.32    0.54
  -4  10  -2   17.49    0.63
   4  10   2   18.57    0.55
  -4  10  -2   18.72    0.56
   5 -10   2    0.19    0.11
  -5 -10  -2    0.23    0.14
  -5  10  -2    0.11    0.16
   5  10   2    0.10    0.10
  -5  10  -2    0.41    0.20
  -6 -10  -2    0.09    0.15
  -6 -10  -2    0.06    0.18
   6 -10   2    0.20    0.12
  -6  10  -2   -0.09    0.19
   6  10   2   -0.02    0.11
  -6  10  -2    0.30    0.22
  -7 -10  -2    5.64    0.38
  -7 -10  -2    5.56    0.32
   7 -10   2    5.60    0.28
   7  10   2    5.88    0.29
  -7  10  -2    5.82    0.44
  -8 -10  -2    5.34    0.38
  -8 -10  -2    5.18    0.32
   8 -10   2    4.88    0.28
   8  10   2    5.21    0.28
  -8  10  -2    4.90    0.43
   9 -10   2    0.22    0.16
  -9 -10  -2   -0.16    0.18
  -9  10  -2   -0.07    0.29
 -10 -10  -2    1.61    0.27
  10 -10   2    1.70    0.22
 -10  10  -2    1.59    0.38
  11 -10   2    1.13    0.22
  10 -11  -2    0.57    0.20
 -10 -11   2    0.75    0.24
  10  11  -2    0.49    0.20
 -10  11   2    0.63    0.34
   9 -11  -2    0.82    0.19
  -9 -11   2    0.51    0.21
   9  11  -2    0.49    0.18
  -9  11   2    0.38    0.30
   8 -11  -2    1.31    0.19
  -8 -11   2    1.12    0.22
  -8  11   2    0.88    0.29
   8  11  -2    1.04    0.19
  -7 -11   2    1.64    0.22
   7 -11  -2    2.13    0.20
   7  11  -2    2.00    0.20
  -7  11   2    2.03    0.30
   6 -11  -2    1.05    0.16
  -6 -11   2    1.00    0.19
  -6  11   2    1.15    0.24
   6  11  -2    0.95    0.16
  -5 -11   2    1.76    0.19
   5 -11  -2    1.40    0.16
   5  11  -2    1.48    0.16
  -5  11   2    1.56    0.23
   5  11  -2    1.76    0.15
  -4 -11   2    0.01    0.07
   4 -11  -2    0.08    0.11
  -4 -11   2    0.03    0.13
   4 -11  -2    0.07    0.11
   4  11  -2   -0.01    0.10
   4  11  -2   -0.14    0.07
  -4  11   2    0.06    0.12
  -4  11   2    0.16    0.16
  -3 -11   2    5.25    0.18
   3 -11  -2    4.93    0.22
  -3 -11   2    4.92    0.24
   3 -11  -2    5.07    0.23
  -3  11   2    4.92    0.29
   3  11  -2    5.19    0.19
   3  11  -2    5.21    0.22
  -3  11   2    5.05    0.22
  -2 -11   2    0.59    0.06
   2 -11  -2    0.56    0.11
  -2 -11   2    0.58    0.13
   2 -11  -2    0.64    0.10
   2  11  -2    0.68    0.10
   2  11  -2    0.76    0.08
  -2  11   2    0.67    0.10
  -2  11   2    0.61    0.14
  -1 -11   2   10.25    0.28
   1 -11  -2    9.91    0.34
   1 -11  -2    9.94    0.30
  -1 -11   2    9.99    0.35
  -1  11   2    9.91    0.30
   1  11  -2   10.36    0.32
  -1  11   2   10.08    0.36
   1  11  -2    9.71    0.31
   0 -11   2   16.78    0.50
   0 -11   2   16.56    0.43
   0 -11  -2   16.42    0.49
   0 -11  -2   16.14    0.43
   0  11   2   16.34    0.45
   0  11  -2   16.32    0.50
   0  11  -2   16.20    0.46
   0  11   2   16.19    0.49
   1 -11   2    0.73    0.09
  -1 -11  -2    0.75    0.13
   1 -11   2    0.57    0.11
  -1 -11  -2    0.69    0.06
  -1  11  -2    0.81    0.10
   1  11   2    0.79    0.09
   1  11   2    0.81    0.09
  -1  11  -2    0.72    0.13
  -2 -11  -2   24.20    0.69
   2 -11   2   23.11    0.61
   2 -11   2   23.57    0.65
  -2 -11  -2   24.12    0.57
  -2  11  -2   22.70    0.72
  -2  11  -2   24.31    0.65
   2  11   2   23.29    0.65
   2  11   2   24.32    0.66
   3 -11   2    4.22    0.20
  -3 -11  -2    4.18    0.22
   3 -11   2    4.46    0.19
   3  11   2    4.23    0.22
   3  11   2    4.35    0.18
  -3  11  -2    4.36    0.24
  -3  11  -2    4.55    0.29
   4 -11   2    1.29    0.13
  -4 -11  -2    1.55    0.18
   4  11   2    1.20    0.11
   4  11   2    1.26    0.15
  -4  11  -2    1.58    0.18
  -4  11  -2    1.61    0.22
  -5 -11  -2   -0.01    0.14
   5 -11   2   -0.01    0.11
   5  11   2   -0.01    0.09
   5  11   2   -0.14    0.13
  -5  11  -2    0.08    0.17
  -5  11  -2    0.08    0.20
   6 -11   2    0.59    0.14
  -6 -11  -2    0.73    0.18
   6  11   2    0.63    0.13
  -6  11  -2    0.58    0.20
   6  11   2    0.78    0.17
  -6  11  -2    0.59    0.24
   7 -11   2    4.03    0.25
  -7 -11  -2    3.96    0.29
  -7  11  -2    4.21    0.39
   7  11   2    4.43    0.25
  -8 -11  -2    1.17    0.22
   8 -11   2    1.04    0.18
  -8  11  -2    0.87    0.30
   9 -11   2    4.06    0.29
  -9 -11  -2    4.06    0.34
   9  11   2    4.20    0.32
  -9  11  -2    4.22    0.44
 -10 -11  -2    4.15    0.34
  10 -11   2    4.39    0.30
  10  11   2    4.15    0.34
 -10  11  -2    4.18    0.47
 -11 -12   2   -0.06    0.23
 -10 -12   2    0.88    0.25
  10 -12  -2    0.50    0.20
 -10  12   2    0.20    0.35
  10  12  -2    0.47    0.20
  -9 -12   2    0.18    0.21
   9 -12  -2    0.41    0.18
  -9  12   2    0.32    0.31
   9  12  -2    0.47    0.19
   8 -12  -2    0.99    0.19
  -8 -12   2    1.14    0.23
   8  12  -2    0.92    0.19
  -8  12   2    0.86    0.30
   7 -12  -2    0.02    0.14
  -7 -12   2   -0.03    0.18
  -7  12   2    0.04    0.25
   7  12  -2   -0.09    0.14
  -6 -12   2   -0.07    0.17
   6 -12  -2    0.31    0.15
  -6  12   2    0.29    0.22
   6  12  -2    0.26    0.14
  -5 -12   2    5.75    0.31
   5 -12  -2    5.26    0.27
  -5  12   2    4.99    0.37
   5  12  -2    5.70    0.27
   5  12  -2    5.98    0.23
  -4 -12   2   -0.11    0.12
   4 -12  -2    0.28    0.12
   4 -12  -2   -0.01    0.11
   4  12  -2   -0.05    0.07
  -4  12   2    0.01    0.16
  -4  12   2    0.09    0.13
   4  12  -2    0.04    0.11
   3 -12  -2   14.96    0.46
   3 -12  -2   15.05    0.44
  -3 -12   2   15.21    0.39
  -3 -12   2   14.53    0.49
   3  12  -2   15.42    0.46
   3  12  -2   16.08    0.44
  -3  12   2   14.12    0.52
  -3  12   2   14.07    0.44
  -2 -12   2    0.16    0.05
   2 -12  -2    0.23    0.11
  -2 -12   2    0.06    0.12
   2 -12  -2    0.13    0.09
  -2  12   2    0.02    0.09
   2  12  -2    0.10    0.09
  -2  12   2    0.19    0.13
   2  12  -2    0.12    0.07
  -1 -12   2    3.88    0.22
   1 -12  -2    3.92    0.20
  -1 -12   2    3.98    0.15
   1 -12  -2    3.76    0.18
  -1  12   2    3.87    0.18
  -1  12   2    3.82    0.23
   1  12  -2    4.52    0.19
   1  12  -2    3.80    0.18
   0 -12   2   49.15    1.19
   0 -12   2   50.82    1.33
   0 -12  -2   49.58    1.33
   0 -12  -2   51.42    1.19
   0  12  -2   49.30    1.26
   0  12   2   48.25    1.36
   0  12   2   49.62    1.25
   0  12  -2   49.80    1.36
   1 -12   2    1.03    0.13
  -1 -12  -2    1.06    0.14
  -1 -12  -2    1.09    0.08
   1 -12   2    0.91    0.10
  -1  12  -2    1.01    0.11
   1  12   2    1.12    0.11
   1  12   2    1.17    0.11
  -1  12  -2    1.10    0.14
   2 -12   2    2.07    0.15
   2 -12   2    2.11    0.16
  -2 -12  -2    1.78    0.16
  -2 -12  -2    1.92    0.10
  -2  12  -2    2.05    0.15
  -2  12  -2    1.95    0.19
   2  12   2    1.89    0.14
   2  12   2    1.85    0.14
   3 -12   2   13.69    0.40
  -3 -12  -2   13.00    0.45
   3 -12   2   12.72    0.39
   3  12   2   13.44    0.40
  -3  12  -2   13.17    0.43
  -3  12  -2   12.23    0.48
   3  12   2   13.81    0.42
  -4 -12  -2    5.60    0.29
   4 -12   2    4.95    0.24
   4  12   2    5.51    0.22
   4  12   2    5.39    0.26
  -4  12  -2    4.99    0.34
  -4  12  -2    4.88    0.29
  -5 -12  -2    0.22    0.16
   5 -12   2    0.37    0.13
   5  12   2    0.08    0.14
  -5  12  -2    0.26    0.21
  -5  12  -2    0.25    0.18
   5  12   2    0.24    0.10
   6 -12   2    0.26    0.13
  -6 -12  -2    0.25    0.18
   6  12   2    0.26    0.12
  -6  12  -2    0.05    0.23
   6  12   2    0.18    0.16
   7 -12   2    5.05    0.28
  -7 -12  -2    5.17    0.32
   7  12   2    5.07    0.27
   7  12   2    5.03    0.31
  -7  12  -2    5.10    0.42
   8 -12   2    0.06    0.15
  -8 -12  -2    0.19    0.19
  -8  12  -2    0.20    0.28
   8  12   2   -0.14    0.17
   9 -12   2    4.63    0.30
  -9 -12  -2    4.60    0.36
   9  12   2    4.46    0.33
  -9  12  -2    4.44    0.45
 -10 -12  -2    1.01    0.25
  10 -12   2    0.72    0.20
  10  12   2    1.08    0.24
 -10  12  -2    1.18    0.38
  10 -13  -2    5.79    0.35
 -10 -13   2    5.89    0.39
  10  13  -2    5.65    0.37
 -10  13   2    5.81    0.54
  -9 -13   2    0.99    0.24
   9 -13  -2    0.74    0.19
  -9  13   2    0.51    0.32
   9  13  -2    0.92    0.20
   8 -13  -2    3.02    0.25
  -8 -13   2    2.92    0.29
   8  13  -2    2.91    0.25
  -8  13   2    2.75    0.37
   7 -13  -2    0.62    0.16
  -7 -13   2    0.75    0.21
   7  13  -2    0.74    0.17
  -7  13   2    0.59    0.26
   6 -13  -2    0.73    0.16
  -6 -13   2    0.58    0.19
   6  13  -2    0.65    0.16
  -6  13   2    0.43    0.24
   5 -13  -2    2.03    0.18
  -5 -13   2    1.98    0.22
   5  13  -2    2.04    0.19
  -5  13   2    1.89    0.26
  -4 -13   2    6.59    0.31
   4 -13  -2    7.05    0.29
   4 -13  -2    7.37    0.28
   4  13  -2    6.73    0.29
   4  13  -2    7.21    0.25
  -4  13   2    6.70    0.37
  -3 -13   2    1.92    0.19
   3 -13  -2    1.79    0.15
   3 -13  -2    2.18    0.19
  -3 -13   2    1.96    0.13
   3  13  -2    2.26    0.14
   3  13  -2    1.90    0.15
  -3  13   2    2.03    0.21
  -3  13   2    1.66    0.16
  -2 -13   2    3.06    0.14
   2 -13  -2    2.91    0.20
   2 -13  -2    3.30    0.19
  -2 -13   2    3.13    0.21
  -2  13   2    2.92    0.18
   2  13  -2    3.29    0.18
   2  13  -2    3.52    0.17
  -2  13   2    2.75    0.24
  -1 -13   2    4.98    0.26
  -1 -13   2    5.41    0.19
   1 -13  -2    5.25    0.24
   1 -13  -2    5.44    0.21
   1  13  -2    5.56    0.22
  -1  13   2    5.35    0.27
   1  13  -2    5.80    0.23
  -1  13   2    5.51    0.21
   0 -13   2    1.57    0.15
   0 -13  -2    1.39    0.10
   0 -13  -2    1.41    0.15
   0 -13   2    1.72    0.13
   0  13  -2    1.96    0.18
   0  13  -2    1.71    0.14
   0  13   2    1.36    0.11
   0  13   2    1.48    0.14
  -1 -13  -2    0.67    0.07
  -1 -13  -2    0.59    0.14
   1 -13   2    0.63    0.09
   1 -13   2    0.60    0.12
  -1  13  -2    0.50    0.14
   1  13   2    0.63    0.10
  -1  13  -2    0.63    0.11
   1  13   2    0.67    0.11
   2 -13   2    4.70    0.22
   2 -13   2    4.69    0.21
  -2 -13  -2    4.60    0.26
  -2 -13  -2    5.02    0.16
  -2  13  -2    4.83    0.24
  -2  13  -2    4.45    0.28
   2  13   2    5.45    0.21
   2  13   2    4.97    0.22
  -3 -13  -2    9.42    0.37
   3 -13   2    8.93    0.31
   3 -13   2    9.32    0.31
  -3  13  -2    8.54    0.41
   3  13   2    9.92    0.31
   3  13   2    9.32    0.33
  -3  13  -2    8.47    0.35
  -4 -13  -2    0.22    0.14
   4 -13   2    0.51    0.12
  -4  13  -2    0.44    0.20
   4  13   2    0.37    0.10
  -4  13  -2    0.28    0.16
   4  13   2    0.35    0.13
  -5 -13  -2    0.29    0.15
   5 -13   2    0.23    0.13
  -5  13  -2    0.42    0.19
   5  13   2    0.28    0.14
   5  13   2   -0.06    0.11
  -5  13  -2    0.57    0.22
  -6 -13  -2   19.84    0.67
   6 -13   2   19.54    0.59
  -6  13  -2   19.93    0.76
   6  13   2   20.98    0.64
   6  13   2   20.99    0.62
   7 -13   2   -0.02    0.14
  -7 -13  -2   -0.13    0.18
  -7  13  -2    0.12    0.26
   7  13   2    0.03    0.16
  -8 -13  -2    0.26    0.21
   8 -13   2    0.33    0.17
  -8  13  -2    0.07    0.29
   8  13   2    0.51    0.19
  -9 -13  -2    0.44    0.23
   9 -13   2    0.25    0.17
   9  13   2    0.27    0.20
  -9  13  -2    0.46    0.33
  10 -13   2    0.81    0.21
 -10 -13  -2    0.65    0.25
 -10  13  -2    0.77    0.37
  10  13   2    1.09    0.24
 -10 -14   2    2.43    0.31
  -9 -14   2    0.52    0.23
   9 -14  -2    0.60    0.20
   9  14  -2    0.47    0.19
  -9  14   2    0.24    0.32
   8 -14  -2    0.12    0.16
  -8 -14   2    0.09    0.20
  -8  14   2   -0.16    0.27
   8  14  -2    0.08    0.17
  -7 -14   2    0.44    0.20
   7 -14  -2    0.40    0.16
  -7  14   2    0.59    0.27
   7  14  -2    0.56    0.17
  -6 -14   2    3.90    0.30
   6 -14  -2    3.61    0.25
  -6  14   2    3.87    0.35
   6  14  -2    4.27    0.26
  -5 -14   2    0.51    0.18
   5 -14  -2    0.16    0.13
   5  14  -2    0.38    0.14
  -5  14   2    0.53    0.23
   4 -14  -2    3.49    0.22
  -4 -14   2    3.15    0.26
   4 -14  -2    3.70    0.22
  -4  14   2    3.12    0.28
   4  14  -2    3.78    0.22
  -3 -14   2    9.21    0.38
   3 -14  -2    8.74    0.32
   3 -14  -2    8.92    0.33
  -3  14   2    8.48    0.33
   3  14  -2    9.69    0.31
   3  14  -2    8.99    0.33
  -3  14   2    8.72    0.41
   2 -14  -2   16.52    0.47
   2 -14  -2   16.07    0.51
  -2 -14   2   16.29    0.54
  -2 -14   2   17.16    0.43
  -2  14   2   16.38    0.48
   2  14  -2   16.38    0.49
   2  14  -2   17.65    0.50
  -2  14   2   16.69    0.57
   1 -14  -2    1.65    0.13
   1 -14  -2    1.69    0.16
  -1 -14   2    1.72    0.12
  -1 -14   2    1.83    0.18
  -1  14   2    1.71    0.17
  -1  14   2    1.62    0.13
   1  14  -2    1.79    0.14
   1  14  -2    1.60    0.13
   0 -14  -2    9.07    0.27
   0 -14   2    8.57    0.33
   0 -14  -2    9.03    0.34
   0 -14   2    8.48    0.27
   0  14   2    8.90    0.29
   0  14   2    8.78    0.34
   0  14  -2    8.51    0.30
   0  14  -2    8.73    0.34
   1 -14   2    5.43    0.25
  -1 -14  -2    5.33    0.27
  -1 -14  -2    5.74    0.19
   1 -14   2    5.63    0.22
   1  14   2    5.56    0.24
  -1  14  -2    5.52    0.23
   1  14   2    5.22    0.22
  -1  14  -2    5.87    0.29
   2 -14   2    4.28    0.22
  -2 -14  -2    4.21    0.25
   2 -14   2    3.75    0.19
  -2  14  -2    3.89    0.23
   2  14   2    4.38    0.20
   2  14   2    3.75    0.21
  -2  14  -2    3.67    0.28
   3 -14   2    7.64    0.29
  -3 -14  -2    8.77    0.36
   3 -14   2    8.13    0.30
  -3  14  -2    8.05    0.39
  -3  14  -2    7.45    0.33
   3  14   2    8.47    0.29
   3  14   2    7.87    0.31
  -4 -14  -2    0.84    0.18
   4 -14   2    0.75    0.14
  -4  14  -2    0.95    0.22
   4  14   2    0.73    0.15
  -4  14  -2    0.99    0.18
   4  14   2    0.80    0.11
  -5 -14  -2    2.08    0.23
   5 -14   2    1.69    0.17
   5  14   2    2.11    0.18
   5  14   2    2.16    0.20
  -5  14  -2    2.22    0.28
  -6 -14  -2    0.18    0.17
   6 -14   2    0.48    0.15
   6  14   2    0.28    0.16
   6  14   2    0.17    0.12
  -6  14  -2    0.00    0.24
  -7 -14  -2    1.31    0.23
   7 -14   2    1.15    0.18
   7  14   2    1.27    0.20
  -7  14  -2    1.28    0.31
  -8 -14  -2    3.21    0.30
   8 -14   2    2.81    0.24
  -8  14  -2    2.67    0.38
   8  14   2    3.14    0.27
  -9 -14  -2   11.83    0.52
   9 -14   2   11.83    0.46
  -9  14  -2   11.93    0.67
   9  14   2   11.68    0.49
 -10 -14  -2    1.63    0.30
   9 -15  -2    4.11    0.31
  -9 -15   2    4.16    0.36
  -9  15   2    4.33    0.47
   9  15  -2    4.31    0.32
  -8 -15   2    1.96    0.27
   8 -15  -2    1.35    0.21
   8  15  -2    1.76    0.22
  -8  15   2    1.71    0.35
   7 -15  -2    4.82    0.29
  -7 -15   2    4.95    0.34
  -7  15   2    4.87    0.44
   7  15  -2    4.98    0.30
  -6 -15   2    1.37    0.23
   6 -15  -2    1.07    0.17
   6  15  -2    1.12    0.18
  -6  15   2    0.91    0.27
   5 -15  -2    2.35    0.20
  -5 -15   2    2.55    0.25
   5  15  -2    2.05    0.19
  -5  15   2    2.67    0.30
  -4 -15   2    7.90    0.36
   4 -15  -2    8.18    0.32
  -4  15   2    7.55    0.41
   4  15  -2    7.89    0.32
   3 -15  -2    0.71    0.13
  -3 -15   2    0.78    0.18
   3 -15  -2    0.63    0.15
   3  15  -2    0.60    0.11
  -3  15   2    0.79    0.20
   3  15  -2    0.55    0.13
  -2 -15   2    0.54    0.16
   2 -15  -2    0.66    0.15
  -2 -15   2    0.40    0.08
   2 -15  -2    0.48    0.11
  -2  15   2    0.29    0.16
   2  15  -2    0.42    0.11
   2  15  -2    0.37    0.11
  -2  15   2    0.45    0.12
   1 -15  -2    0.37    0.10
   1 -15  -2    0.35    0.13
  -1 -15   2    0.28    0.15
  -1 -15   2    0.31    0.08
   1  15  -2    0.35    0.12
  -1  15   2    0.26    0.14
  -1  15   2    0.27    0.10
   1  15  -2    0.19    0.10
   0 -15   2    2.02    0.14
   0 -15  -2    1.83    0.13
   0 -15  -2    2.00    0.19
   0 -15   2    2.13    0.18
   0  15   2    1.82    0.15
   0  15  -2    2.31    0.21
   0  15  -2    1.93    0.15
   0  15   2    2.19    0.21
  -1 -15  -2    2.08    0.12
   1 -15   2    1.83    0.15
   1 -15   2    2.32    0.20
  -1 -15  -2    2.05    0.19
   1  15   2    1.98    0.16
  -1  15  -2    2.16    0.20
  -1  15  -2    2.16    0.18
   1  15   2    2.06    0.18
  -2 -15  -2    0.25    0.15
   2 -15   2   -0.05    0.09
   2 -15   2    0.35    0.13
  -2  15  -2    0.06    0.16
   2  15   2    0.23    0.11
  -2  15  -2    0.31    0.14
   2  15   2    0.32    0.11
  -3 -15  -2    0.21    0.16
   3 -15   2    0.10    0.11
  -3  15  -2    0.31    0.18
  -3  15  -2   -0.05    0.15
   3  15   2    0.14    0.10
   3  15   2    0.13    0.12
   4 -15   2    1.22    0.15
  -4 -15  -2    1.47    0.21
   4  15   2    1.52    0.14
  -4  15  -2    1.09    0.19
  -4  15  -2    1.41    0.24
   4  15   2    1.17    0.17
  -5 -15  -2    0.21    0.18
   5 -15   2    0.24    0.14
  -5  15  -2    0.06    0.23
   5  15   2   -0.23    0.14
   5  15   2    0.25    0.11
   6 -15   2   13.11    0.45
  -6 -15  -2   13.26    0.52
   6  15   2   12.96    0.47
  -6  15  -2   13.35    0.60
  -7 -15  -2    1.89    0.26
   7 -15   2    0.99    0.18
   7  15   2    1.94    0.22
  -7  15  -2    2.16    0.34
   8 -15   2    0.32    0.17
  -8 -15  -2    0.09    0.21
  -8  15  -2   -0.03    0.30
   8  15   2    0.10    0.18
   9 -15   2    0.68    0.19
  -9 -15  -2    0.52    0.25
  -9  15  -2    0.90    0.35
   9  15   2    0.37    0.20
 -10 -15  -2    2.66    0.32
  -9 -16   2    0.43    0.25
   9 -16  -2    0.09    0.19
   9  16  -2    0.26    0.20
  -9  16   2    0.45    0.34
  -8 -16   2    0.14    0.22
   8 -16  -2    0.14    0.17
  -8  16   2    0.20    0.31
   8  16  -2   -0.09    0.17
  -7 -16   2    1.43    0.25
   7 -16  -2    1.32    0.20
  -7  16   2    1.02    0.31
   7  16  -2    1.37    0.20
  -6 -16   2   -0.27    0.18
   6 -16  -2    0.02    0.15
  -6  16   2    0.24    0.26
   6  16  -2    0.03    0.15
  -5 -16   2    3.96    0.30
   5 -16  -2    4.10    0.25
  -5  16   2    3.72    0.34
   5  16  -2    3.74    0.25
   4 -16  -2    3.92    0.24
  -4 -16   2    3.98    0.27
   4  16  -2    3.92    0.23
  -4  16   2    3.50    0.33
  -3 -16   2    6.22    0.33
   3 -16  -2    6.86    0.27
   3 -16  -2    6.45    0.29
  -3  16   2    6.04    0.37
   3  16  -2    6.26    0.27
  -2 -16   2   20.16    0.65
   2 -16  -2   20.35    0.56
   2 -16  -2   20.65    0.63
   2  16  -2   21.32    0.62
  -2  16   2   19.68    0.59
  -2  16   2   20.77    0.68
   2  16  -2   20.27    0.59
  -1 -16   2    0.02    0.08
   1 -16  -2    0.05    0.14
  -1 -16   2   -0.06    0.14
   1 -16  -2   -0.07    0.09
  -1  16   2   -0.17    0.14
   1  16  -2    0.05    0.12
   1  16  -2    0.26    0.11
  -1  16   2    0.20    0.11
   0 -16   2    2.07    0.20
   0 -16  -2    2.21    0.14
   0 -16  -2    1.94    0.20
   0 -16   2    2.05    0.15
   0  16   2    2.04    0.18
   0  16   2    1.81    0.15
   0  16  -2    1.79    0.16
   0  16  -2    2.20    0.19
   1 -16   2   15.48    0.45
   1 -16   2   16.54    0.52
  -1 -16  -2   15.90    0.53
  -1  16  -2   15.95    0.48
   1  16   2   15.48    0.47
   1  16   2   15.81    0.51
  -1  16  -2   16.21    0.55
   2 -16   2    6.46    0.26
   2 -16   2    7.03    0.29
  -2 -16  -2    6.56    0.33
  -2  16  -2    6.79    0.31
   2  16   2    6.40    0.27
  -2  16  -2    6.77    0.36
   2  16   2    6.89    0.28
   3 -16   2    0.00    0.11
  -3 -16  -2   -0.24    0.15
   3  16   2   -0.01    0.12
  -3  16  -2    0.19    0.16
  -3  16  -2   -0.01    0.19
   3  16   2    0.10    0.11
  -4 -16  -2    0.25    0.18
   4 -16   2    0.20    0.13
   4  16   2    0.31    0.14
   4  16   2    0.25    0.12
  -4  16  -2    0.26    0.22
   5 -16   2    0.17    0.14
  -5 -16  -2    0.33    0.17
   5  16   2    0.25    0.15
  -5  16  -2    0.14    0.23
  -6 -16  -2    0.16    0.20
   6 -16   2    0.30    0.15
  -6  16  -2    0.34    0.26
   6  16   2    0.48    0.17
   7 -16   2    0.44    0.17
  -7 -16  -2    0.55    0.22
   7  16   2    0.56    0.19
  -7  16  -2    0.57    0.29
   8 -16   2    0.27    0.18
  -8 -16  -2    0.46    0.23
   8  16   2   -0.12    0.18
  -8  16  -2    0.83    0.33
   9 -16   2    0.07    0.18
  -9 -16  -2   -0.28    0.22
   9  16   2   -0.09    0.19
  -9  16  -2    0.31    0.34
  -9 -17   2    0.47    0.25
   8 -17  -2    0.04    0.18
  -8 -17   2    0.32    0.23
   8  17  -2    0.32    0.19
  -8  17   2    0.67    0.33
  -7 -17   2   -0.14    0.20
   7 -17  -2    0.13    0.17
  -7  17   2   -0.35    0.27
   7  17  -2    0.23    0.17
   6 -17  -2    5.65    0.30
  -6 -17   2    5.28    0.35
  -6  17   2    4.96    0.42
   6  17  -2    4.78    0.29
  -5 -17   2    0.36    0.20
   5 -17  -2    0.19    0.14
  -5  17   2    0.44    0.24
   5  17  -2    0.48    0.15
  -4 -17   2    2.38    0.25
   4 -17  -2    2.09    0.19
   4  17  -2    2.04    0.19
  -4  17   2    2.59    0.29
   3 -17  -2    3.12    0.22
  -3 -17   2    3.34    0.27
   3 -17  -2    3.56    0.25
  -3  17   2    3.20    0.29
   3  17  -2    3.05    0.22
  -2 -17   2    3.08    0.26
   2 -17  -2    3.27    0.20
   2 -17  -2    3.42    0.24
   2  17  -2    2.92    0.21
   2  17  -2    3.67    0.23
  -2  17   2    3.53    0.29
   1 -17  -2    0.81    0.17
  -1 -17   2    0.92    0.18
   1 -17  -2    0.89    0.12
  -1 -17   2    0.82    0.10
  -1  17   2    0.99    0.18
  -1  17   2    0.70    0.13
   1  17  -2    0.78    0.15
   1  17  -2    0.70    0.13
   0 -17  -2   19.68    0.52
   0 -17  -2   18.47    0.62
   0 -17   2   19.80    0.52
   0 -17   2   20.23    0.62
   0  17  -2   19.28    0.57
   0  17   2   19.10    0.62
   0  17   2   18.40    0.55
   0  17  -2   20.03    0.63
   1 -17   2    3.43    0.23
   1 -17   2    3.98    0.20
  -1 -17  -2    3.64    0.26
  -1  17  -2    3.37    0.22
   1  17   2    3.56    0.24
  -1  17  -2    3.92    0.28
   1  17   2    3.65    0.21
   2 -17   2    2.25    0.18
   2 -17   2    2.35    0.21
  -2 -17  -2    2.47    0.23
  -2  17  -2    2.42    0.24
  -2  17  -2    2.37    0.20
   2  17   2    2.15    0.19
   2  17   2    1.89    0.17
   3 -17   2    0.04    0.12
  -3 -17  -2    0.07    0.17
  -3  17  -2    0.15    0.20
   3  17   2    0.10    0.12
   3  17   2   -0.06    0.13
  -3  17  -2   -0.02    0.17
   4 -17   2    0.38    0.14
  -4 -17  -2    0.23    0.17
   4  17   2    0.51    0.15
   4  17   2    0.19    0.12
  -4  17  -2    0.36    0.23
  -5 -17  -2    3.98    0.31
   5 -17   2    3.48    0.24
  -5  17  -2    3.93    0.36
   5  17   2    3.31    0.26
  -6 -17  -2   -0.07    0.20
   6 -17   2    0.26    0.15
  -6  17  -2    0.14    0.26
   6  17   2    0.19    0.17
   7 -17   2    2.02    0.22
  -7 -17  -2    2.32    0.28
  -7  17  -2    1.69    0.35
   7  17   2    1.82    0.22
  -8 -17  -2    0.97    0.26
   8 -17   2    0.59    0.19
   8  17   2    1.07    0.22
  -8  17  -2    1.07    0.35
  -9 -17  -2    0.22    0.25
  -8 -18   2    0.11    0.24
   8 -18  -2    0.23    0.19
   8  18  -2    0.27    0.19
  -8  18   2    0.11    0.32
  -7 -18   2    0.29    0.23
   7 -18  -2    0.16    0.17
  -7  18   2    0.20    0.30
   7  18  -2    0.41    0.18
   6 -18  -2   -0.01    0.16
  -6 -18   2    0.29    0.22
   6  18  -2    0.23    0.16
  -6  18   2    0.47    0.28
   5 -18  -2   10.10    0.39
  -5 -18   2   10.95    0.47
  -5  18   2   10.54    0.53
   5  18  -2   10.35    0.40
   4 -18  -2    7.47    0.32
  -4 -18   2    7.57    0.39
  -4  18   2    7.92    0.45
   4  18  -2    8.07    0.33
  -3 -18   2    7.57    0.37
   3 -18  -2    6.59    0.29
   3  18  -2    7.67    0.30
  -3  18   2    6.89    0.40
  -2 -18   2    0.98    0.19
   2 -18  -2    0.89    0.17
   2 -18  -2    0.65    0.13
   2  18  -2    0.63    0.14
  -2  18   2    0.59    0.20
   1 -18  -2    2.63    0.18
  -1 -18   2    2.40    0.23
   1 -18  -2    2.75    0.23
  -1 -18   2    2.60    0.16
  -1  18   2    2.27    0.19
   1  18  -2    2.83    0.20
  -1  18   2    2.55    0.24
   1  18  -2    2.59    0.23
   0 -18  -2   18.25    0.58
   0 -18   2   17.17    0.57
   0 -18   2   17.81    0.48
   0 -18  -2   18.19    0.48
   0  18   2   17.32    0.58
   0  18   2   17.44    0.51
   0  18  -2   17.45    0.59
   0  18  -2   16.15    0.53
   1 -18   2    0.02    0.10
  -1 -18  -2   -0.02    0.16
   1 -18   2    0.04    0.15
  -1  18  -2   -0.08    0.17
   1  18   2   -0.05    0.14
  -1  18  -2    0.17    0.14
   1  18   2   -0.09    0.11
  -2 -18  -2    4.69    0.30
   2 -18   2    4.62    0.23
   2  18   2    4.65    0.26
  -2  18  -2    3.94    0.27
  -2  18  -2    4.11    0.32
   2  18   2    4.34    0.23
  -3 -18  -2    2.52    0.25
   3 -18   2    2.00    0.17
  -3  18  -2    2.11    0.26
   3  18   2    2.40    0.21
   3  18   2    2.25    0.19
   4 -18   2    0.22    0.14
  -4 -18  -2    0.35    0.18
  -4  18  -2    0.04    0.22
   4  18   2    0.16    0.14
  -5 -18  -2    8.63    0.40
   5 -18   2    7.66    0.33
  -5  18  -2    8.41    0.49
   5  18   2    8.51    0.36
   6 -18   2   -0.29    0.14
  -6 -18  -2    0.03    0.20
  -6  18  -2    0.19    0.27
   6  18   2   -0.29    0.16
  -7 -18  -2    3.93    0.34
   7 -18   2    3.56    0.27
  -7  18  -2    3.88    0.43
   7  18   2    4.56    0.31
   8 -18   2    0.92    0.20
  -8 -18  -2    1.24    0.27
   8  18   2    1.06    0.22
  -8  18  -2    0.91    0.36
  -8 -19   2    2.04    0.31
   8 -19  -2    2.00    0.25
  -8  19   2    1.78    0.39
   7 -19  -2    0.62    0.19
  -7 -19   2    1.04    0.27
  -7  19   2    1.04    0.33
   7  19  -2    0.96    0.20
   6 -19  -2    0.66    0.18
  -6 -19   2    0.71    0.24
   6  19  -2    0.35    0.17
  -6  19   2    0.33    0.28
   5 -19  -2    1.27    0.18
  -5 -19   2    1.70    0.26
   5  19  -2    1.53    0.19
  -5  19   2    1.77    0.30
  -4 -19   2   -0.03    0.17
   4 -19  -2   -0.01    0.14
  -4  19   2    0.22    0.23
   4  19  -2    0.16    0.14
  -3 -19   2    0.41    0.19
   3 -19  -2    0.30    0.13
   3  19  -2    0.36    0.14
  -3  19   2    0.41    0.21
   2 -19  -2    2.91    0.24
  -2 -19   2    3.03    0.26
   2 -19  -2    2.48    0.20
   2  19  -2    2.89    0.21
  -2  19   2    2.99    0.28
  -1 -19   2    0.15    0.17
   1 -19  -2    0.03    0.16
   1 -19  -2   -0.03    0.10
   1  19  -2    0.10    0.12
  -1  19   2    0.09    0.18
   0 -19   2    1.32    0.20
   0 -19  -2    1.30    0.21
   0 -19   2    1.09    0.12
   0  19   2    0.77    0.18
   0  19  -2    1.12    0.19
   0  19  -2    1.05    0.16
   0  19   2    0.89    0.14
   1 -19   2    2.34    0.22
  -1 -19  -2    2.37    0.25
   1 -19   2    2.25    0.18
  -1  19  -2    2.67    0.25
  -1  19  -2    1.87    0.19
   1  19   2    2.92    0.25
   1  19   2    2.24    0.19
  -2 -19  -2    1.20    0.22
   2 -19   2    1.14    0.15
   2  19   2    0.91    0.15
   2  19   2    1.24    0.17
  -2  19  -2    0.96    0.22
  -2  19  -2    0.98    0.19
   3 -19   2    2.77    0.21
  -3 -19  -2    3.16    0.28
  -3  19  -2    3.06    0.30
   3  19   2    3.04    0.22
   4 -19   2    0.40    0.14
  -4 -19  -2    0.10    0.18
  -4  19  -2    0.35    0.24
   4  19   2    0.16    0.15
  -5 -19  -2    7.95    0.41
   5 -19   2    7.38    0.33
   5  19   2    7.19    0.34
  -5  19  -2    7.73    0.49
   6 -19   2    4.00    0.27
  -6 -19  -2    4.06    0.35
  -6  19  -2    4.71    0.43
   6  19   2    4.36    0.29
  -7 -19  -2    0.94    0.26
   7 -19   2    0.89    0.19
   7  19   2    1.03    0.21
  -7  19  -2    1.41    0.35
  -8 -19  -2    0.46    0.25
  -8  19  -2    0.52    0.35
   7 -20  -2    0.08    0.18
  -7 -20   2    0.05    0.23
   7  20  -2    0.15    0.18
  -7  20   2    0.45    0.33
  -6 -20   2    4.12    0.35
   6 -20  -2    5.06    0.30
   6  20  -2    4.82    0.30
  -6  20   2    4.89    0.46
   5 -20  -2   -0.02    0.15
  -5 -20   2   -0.11    0.20
   5  20  -2   -0.04    0.15
  -5  20   2    0.10    0.26
   4 -20  -2    0.21    0.14
  -4 -20   2    0.28    0.21
  -4  20   2    0.33    0.24
   4  20  -2    0.21    0.15
   3 -20  -2   -0.12    0.13
  -3 -20   2    0.05    0.19
   3  20  -2   -0.10    0.14
  -3  20   2    0.14    0.21
   2 -20  -2    3.28    0.21
   2 -20  -2    3.62    0.27
  -2 -20   2    3.45    0.29
  -2  20   2    3.35    0.30
   2  20  -2    3.19    0.22
   1 -20  -2    1.67    0.22
   1 -20  -2    1.12    0.14
  -1 -20   2    1.67    0.23
  -1  20   2    1.65    0.23
   1  20  -2    1.30    0.17
   0 -20  -2    0.25    0.19
   0 -20   2    0.05    0.17
   0 -20   2    0.00    0.10
   0  20  -2    0.34    0.18
   0  20  -2    0.18    0.15
   0  20   2    0.16    0.17
   0  20   2    0.11    0.13
  -1 -20  -2    0.82    0.20
   1 -20   2    0.76    0.13
   1 -20   2    0.81    0.19
  -1  20  -2    0.67    0.17
  -1  20  -2    0.77    0.21
   1  20   2    1.00    0.18
   1  20   2    0.52    0.14
  -2 -20  -2    2.90    0.27
   2 -20   2    2.38    0.20
   2  20   2    3.57    0.25
   2  20   2    2.79    0.22
  -2  20  -2    3.08    0.29
  -3 -20  -2    0.76    0.21
   3 -20   2    0.34    0.14
   3  20   2    0.35    0.15
  -3  20  -2    0.67    0.24
  -4 -20  -2    1.88    0.26
   4 -20   2    1.61    0.18
  -4  20  -2    1.89    0.30
   4  20   2    1.92    0.20
  -5 -20  -2    1.49    0.26
   5 -20   2    1.39    0.19
  -5  20  -2    1.16    0.30
   5  20   2    1.20    0.19
   6 -20   2    4.89    0.29
  -6 -20  -2    4.57    0.34
  -6  20  -2    4.92    0.46
   6  20   2    5.13    0.31
   7 -20   2    0.50    0.19
  -7 -20  -2    0.43    0.26
   7  20   2    0.37    0.20
  -7  20  -2    0.37    0.33
   7 -21  -2    1.18    0.22
  -7  21   2    1.79    0.38
   6 -21  -2    0.44    0.18
  -6 -21   2    0.61    0.25
  -6  21   2    0.29    0.30
   6  21  -2    0.40    0.18
   5 -21  -2    0.17    0.16
  -5 -21   2    0.30    0.23
  -5  21   2    0.45    0.28
   5  21  -2    0.03    0.16
   4 -21  -2    0.68    0.16
  -4 -21   2    1.14    0.25
  -4  21   2    0.63    0.26
   4  21  -2    0.63    0.17
  -3 -21   2    0.18    0.20
   3 -21  -2    0.13    0.14
  -3  21   2    0.31    0.23
   3  21  -2   -0.05    0.14
   2 -21  -2    2.74    0.21
  -2 -21   2    2.73    0.28
   2  21  -2    2.86    0.22
  -2  21   2    2.82    0.29
   1 -21  -2    4.38    0.31
  -1 -21   2    4.82    0.31
  -1  21   2    4.00    0.32
   1  21  -2    3.84    0.25
   0 -21  -2    0.95    0.21
   0 -21   2    0.83    0.21
   0  21  -2    0.74    0.17
   0  21   2    0.81    0.20
   1 -21   2    1.32    0.20
  -1 -21  -2    1.28    0.22
   1 -21   2    1.03    0.14
  -1  21  -2    0.99    0.19
   1  21   2    1.13    0.16
  -1  21  -2    1.16    0.23
   1  21   2    1.40    0.20
  -2 -21  -2   -0.13    0.18
   2 -21   2   -0.13    0.12
   2  21   2    0.06    0.14
  -2  21  -2    0.08    0.21
   3 -21   2    4.14    0.24
  -3 -21  -2    4.34    0.33
   3  21   2    4.40    0.26
  -3  21  -2    4.30    0.37
   4 -21   2    1.27    0.18
  -4 -21  -2    1.57    0.27
  -4  21  -2    1.49    0.30
   4  21   2    1.22    0.19
  -5 -21  -2   -0.03    0.22
   5 -21   2    0.12    0.15
   5  21   2    0.16    0.17
  -5  21  -2   -0.02    0.27
   6 -21   2    0.26    0.17
  -6 -21  -2   -0.12    0.23
  -6  21  -2    0.44    0.30
   6  21   2   -0.04    0.17
  -7  21  -2    0.61    0.34
   7  21   2   -0.06    0.19
  -6 -22   2    0.60    0.26
   6 -22  -2    0.61    0.19
  -6  22   2    0.55    0.33
   6  22  -2    0.72    0.20
  -5 -22   2    0.28    0.24
   5 -22  -2    0.22    0.16
   5  22  -2    0.05    0.17
  -5  22   2   -0.08    0.27
  -4 -22   2    0.24    0.23
   4 -22  -2   -0.02    0.15
   4  22  -2    0.29    0.17
  -4  22   2    0.28    0.26
  -3 -22   2    5.59    0.36
   3 -22  -2    5.41    0.27
   3  22  -2    4.57    0.28
  -3  22   2    5.67    0.40
  -2 -22   2    6.31    0.37
   2 -22  -2    5.84    0.28
  -2  22   2    6.01    0.39
   2  22  -2    5.96    0.29
  -1 -22   2    0.43    0.20
   1 -22  -2    0.19    0.19
   1  22  -2    0.18    0.16
  -1  22   2    0.28    0.21
   0 -22  -2    7.63    0.37
   0 -22   2    7.36    0.38
   0  22  -2    6.10    0.31
   0  22   2    7.24    0.39
   1 -22   2    0.49    0.13
  -1 -22  -2    0.29    0.20
   1  22   2    0.04    0.14
  -2 -22  -2    0.17    0.21
   2 -22   2   -0.05    0.13
  -2  22  -2    0.57    0.23
   2  22   2    0.04    0.14
   3 -22   2    0.61    0.16
  -3 -22  -2    1.21    0.25
   3  22   2    0.63    0.16
  -3  22  -2    0.81    0.26
  -4 -22  -2   -0.08    0.22
   4 -22   2   -0.01    0.14
  -4  22  -2   -0.28    0.25
   4  22   2   -0.30    0.15
   5 -22   2   -0.06    0.15
  -5 -22  -2    0.22    0.24
   5  22   2   -0.07    0.17
  -5  22  -2   -0.45    0.26
   6 -22   2    0.04    0.17
  -6 -22  -2   -0.06    0.24
  -6  22  -2    0.35    0.32
   6  22   2    0.25    0.19
   6 -23  -2    0.05    0.18
  -5 -23   2    1.46    0.29
   5 -23  -2    1.32    0.20
  -5  23   2    1.57    0.34
   5  23  -2    1.63    0.22
  -4 -23   2    2.07    0.29
   4 -23  -2    1.74    0.20
  -4  23   2    2.27    0.33
   4  23  -2    1.42    0.21
   3 -23  -2    0.10    0.15
  -3 -23   2    0.19    0.22
  -3  23   2    0.60    0.26
   3  23  -2    0.03    0.16
  -2 -23   2    0.89    0.23
   2  23  -2    0.95    0.18
  -2  23   2    1.33    0.26
  -1 -23   2    0.16    0.20
   1 -23  -2    0.27    0.19
  -1  23   2    0.36    0.22
   1  23  -2    0.02    0.16
   0 -23   2    7.81    0.40
   0 -23  -2    6.94    0.38
   0  23   2    7.77    0.41
   0  23  -2    6.36    0.33
  -1 -23  -2    0.18    0.21
   2 -23   2    2.88    0.22
  -2 -23  -2    3.52    0.31
   2  23   2    3.11    0.24
   3 -23   2    0.01    0.14
  -3 -23  -2   -0.09    0.21
   3  23   2   -0.09    0.15
  -3  23  -2    0.34    0.25
   4 -23   2    0.45    0.17
  -4 -23  -2    0.18    0.24
   4  23   2    0.01    0.17
  -4  23  -2    0.37    0.28
   5 -23   2    1.20    0.20
  -5 -23  -2    1.92    0.30
  -5  23  -2    1.76    0.34
   5  23   2    1.66    0.22
  -6  23  -2    0.16    0.32
   5 -24  -2    5.21    0.31
   5  24  -2    5.80    0.34
  -5  24   2    5.34    0.49
   4 -24  -2    1.37    0.19
  -4 -24   2    1.83    0.29
   4  24  -2    1.64    0.22
  -4  24   2    1.67    0.33
  -3 -24   2    3.25    0.33
   3  24  -2    2.30    0.22
  -3  24   2    2.55    0.33
  -2 -24   2    2.92    0.30
   2  24  -2    2.57    0.23
  -2  24   2    2.87    0.32
  -1 -24   2    0.53    0.22
   1  24  -2    0.08    0.17
  -1  24   2    0.40    0.23
   0 -24  -2    0.72    0.24
  -1 -24  -2    0.30    0.23
  -2 -24  -2    0.14    0.23
  -3 -24  -2    1.31    0.28
   3 -24   2    0.73    0.17
   3  24   2    0.69    0.18
  -3  24  -2    1.07    0.29
   4 -24   2    0.35    0.16
  -4 -24  -2    0.74    0.26
   4  24   2    0.45    0.18
  -4  24  -2    0.68    0.31
   5 -24   2    0.45    0.18
  -5  24  -2    1.04    0.33
   5  24   2    0.41    0.20
  -4 -25   2    0.91    0.27
   4 -25  -2    0.77    0.18
   4  25  -2    0.88    0.20
  -4  25   2    0.97    0.31
  -3 -25   2    1.79    0.29
   3  25  -2    1.48    0.22
  -3  25   2    2.11    0.33
  -2 -25   2    0.07    0.22
  -2  25   2    0.74    0.27
   2  25  -2   -0.07    0.18
  -1 -25   2    0.27    0.22
   0 -25  -2    0.99    0.25
  -1 -25  -2    1.41    0.27
  -2 -25  -2    1.40    0.27
   3 -25   2    1.05    0.18
  -3 -25  -2    1.46    0.28
   3  25   2    1.23    0.20
   4 -25   2    1.37    0.20
   4  25   2    1.43    0.22
  -4  25  -2    1.29    0.33
  -5  25  -2    2.65    0.40
  -3 -26   2    0.23    0.25
  -3  26   2    0.48    0.29
   3  26  -2    0.10    0.19
  -2 -26   2    4.05    0.36
   2  26  -2    2.75    0.26
  -1 -26   2    0.91    0.25
   0 -26  -2    0.51    0.24
  -1 -26  -2    1.43    0.29
  -2 -26  -2    2.51    0.32
  -2 -27   2    1.16    0.28
  -1 -27  -2    0.65    0.27
  11   0  -3    1.79    0.28
  -9   0   3   10.69    0.57
   9   0  -3   11.76    0.41
  -9   0   3   10.68    0.49
  -8   0   3    0.29    0.20
  -8   0   3   -0.18    0.14
   8   0  -3   -0.19    0.13
  -8   0   3   -0.20    0.21
  -7   0   3    4.48    0.26
  -7   0   3    4.94    0.26
  -7   0   3    4.81    0.36
  -7   0   3    4.64    0.32
  -6   0   3   -0.12    0.14
  -6   0   3    0.05    0.16
  -6   0   3    0.11    0.11
  -6   0   3    0.05    0.11
  -5   0   3    0.68    0.16
  -5   0   3    0.91    0.13
  -5   0   3    0.97    0.15
  -5   0   3    0.75    0.11
  -4   0   3   -0.09    0.12
  -4   0   3    0.02    0.09
  -4   0   3   -0.01    0.09
  -4   0   3    0.09    0.12
  -3   0   3   53.85    1.47
  -3   0   3   53.98    1.40
  -3   0   3   53.94    1.28
  -3   0   3   53.87    1.36
  -2   0   3    0.00    0.08
  -2   0   3    0.05    0.09
  -2   0   3    0.00    0.08
  -2   0   3   -0.03    0.07
  -1   0   3    6.10    0.18
   1   0  -3    6.11    0.17
  -1   0   3    6.51    0.20
   0   0   3   -0.02    0.02
   0   0  -3   -0.03    0.03
   0   0  -3   -0.09    0.04
   0   0   3    0.01    0.02
  -1   0  -3   78.63    2.04
   1   0   3   79.03    2.11
  -1   0  -3   81.74    1.97
   1   0   3   80.28    1.85
  -2   0  -3    0.12    0.11
   2   0   3    0.04    0.05
  -2   0  -3    0.01    0.10
  -2   0  -3    0.06    0.06
  -3   0  -3   60.99    1.58
  -3   0  -3   62.80    1.58
   3   0   3   61.64    1.45
  -3   0  -3   62.33    1.70
  -4   0  -3    0.01    0.08
  -4   0  -3    0.11    0.14
   4   0   3    0.01    0.06
  -4   0  -3    0.00    0.14
  -5   0  -3   76.87    1.93
  -5   0  -3   73.68    2.08
  -5   0  -3   73.43    1.92
   5   0   3   74.88    1.77
  -6   0  -3    0.18    0.10
   6   0   3    0.07    0.08
  -6   0  -3    0.16    0.19
  -6   0  -3   -0.15    0.16
  -7   0  -3   16.65    0.50
  -7   0  -3   15.68    0.65
   7   0   3   16.79    0.47
  -7   0  -3   16.30    0.60
  -8   0  -3    0.33    0.22
   8   0   3    0.05    0.11
  -9   0  -3    6.64    0.42
   9   0   3    5.36    0.37
  10   0   3    0.55    0.22
 -11   0  -3    4.34    0.41
  11   0   3    4.17    0.36
  12   0   3    0.15    0.26
  10  -1  -3    3.39    0.26
 -10  -1   3    3.61    0.32
 -10   1   3    3.48    0.39
  10   1  -3    3.89    0.33
   9  -1  -3    3.84    0.26
  -9  -1   3    3.66    0.30
  -9  -1   3    3.62    0.36
  -9   1   3    2.82    0.34
  -9   1   3    3.47    0.31
   9   1  -3    3.25    0.25
  -8  -1   3   -0.05    0.19
   8  -1  -3    0.19    0.16
  -8  -1   3   -0.02    0.14
   8  -1  -3    0.02    0.13
  -8  -1   3   -0.08    0.21
  -8   1   3   -0.08    0.22
  -8   1   3   -0.01    0.19
  -7  -1   3    0.10    0.12
  -7  -1   3   -0.11    0.18
  -7  -1   3   -0.04    0.13
  -7  -1   3    0.04    0.17
  -7   1   3    0.10    0.17
  -7   1   3    0.03    0.19
  -6  -1   3   22.82    0.68
  -6  -1   3   23.69    0.69
  -6  -1   3   22.71    0.75
  -6  -1   3   23.26    0.62
  -6   1   3   23.01    0.63
  -6   1   3   23.22    0.69
  -6   1   3   21.79    0.75
  -6   1   3   23.15    0.67
  -5  -1   3   35.36    0.96
  -5  -1   3   34.85    1.04
  -5  -1   3   34.41    0.96
  -5  -1   3   35.91    0.88
  -5   1   3   35.45    1.04
  -5   1   3   34.93    0.95
  -5   1   3   36.03    0.95
  -5   1   3   34.59    0.89
  -4  -1   3    3.54    0.19
  -4  -1   3    3.15    0.20
  -4  -1   3    3.04    0.25
  -4  -1   3    3.33    0.23
  -4   1   3    3.50    0.18
  -4   1   3    3.46    0.24
  -4   1   3    3.39    0.19
  -4   1   3    3.40    0.26
  -3  -1   3   -0.06    0.10
  -3  -1   3   -0.02    0.07
  -3  -1   3   -0.08    0.08
  -3  -1   3   -0.07    0.09
  -3   1   3   -0.05    0.08
  -3   1   3   -0.01    0.08
  -3   1   3    0.06    0.11
  -3   1   3   -0.06    0.09
  -2  -1   3   75.14    1.94
  -2  -1   3   77.49    2.01
   2  -1  -3   72.37    1.93
  -2  -1   3   75.82    1.77
  -2   1   3   77.59    2.02
  -2   1   3   76.95    1.87
  -2   1   3   74.99    1.78
   1  -1  -3   74.51    1.90
  -1  -1   3   76.38    1.96
  -1  -1   3   72.83    1.73
   1  -1  -3   72.91    1.82
  -1  -1   3   76.15    1.90
  -1   1   3   75.39    1.97
   1   1  -3   75.02    1.85
  -1   1   3   74.86    1.74
   0  -1  -3   -0.41    0.04
   0  -1  -3   -0.31    0.04
   0  -1   3   -0.36    0.04
   0  -1   3   -0.39    0.03
   0  -1   3   -0.35    0.02
   0   1   3   -0.32    0.02
   0   1   3   -0.35    0.03
   0   1  -3   -0.36    0.03
   1  -1   3    0.20    0.04
  -1  -1  -3    0.14    0.05
  -1  -1  -3    0.13    0.09
   1   1   3    0.15    0.06
  -1   1  -3    0.08    0.08
  -1   1  -3    0.11    0.09
  -2  -1  -3   28.87    0.76
   2  -1   3   29.72    0.70
  -2  -1  -3   29.37    0.78
  -2   1  -3   28.83    0.77
   2   1   3   28.87    0.68
  -2   1  -3   28.43    0.83
   2   1   3   28.81    0.81
  -2   1  -3   29.27    0.74
  -3  -1  -3   89.59    2.27
  -3  -1  -3   89.16    2.24
   3  -1   3   88.90    2.08
   3   1   3   92.14    2.07
  -3   1  -3   91.77    2.26
   3   1   3   85.29    2.38
  -3   1  -3   89.05    2.41
  -3   1  -3   87.56    2.23
  -4  -1  -3    0.10    0.14
  -4  -1  -3    0.18    0.09
   4  -1   3    0.17    0.07
   4   1   3    0.08    0.06
  -4   1  -3    0.01    0.15
  -4   1  -3    0.23    0.08
  -4   1  -3    0.18    0.14
  -5  -1  -3   12.08    0.38
  -5  -1  -3   13.26    0.46
   5  -1   3   11.87    0.36
  -5   1  -3   13.09    0.50
  -5   1  -3   12.23    0.37
   5   1   3   12.06    0.35
  -5   1  -3   12.96    0.46
  -6  -1  -3    0.35    0.18
   6  -1   3    0.13    0.09
  -6  -1  -3    0.20    0.11
  -6   1  -3    0.11    0.17
  -6   1  -3    0.36    0.19
  -6   1  -3    0.24    0.10
   6   1   3    0.15    0.08
   7  -1   3    3.20    0.20
  -7  -1  -3    2.91    0.21
  -7  -1  -3    3.19    0.28
   7   1   3    3.39    0.27
  -7   1  -3    2.83    0.27
   7   1   3    2.85    0.19
  -7   1  -3    2.94    0.31
  -8  -1  -3   10.71    0.49
   8  -1   3   10.57    0.36
  -8   1  -3   10.36    0.49
  -8   1  -3    9.16    0.53
   8   1   3    9.99    0.45
  -9  -1  -3    0.21    0.24
   9   1   3    0.29    0.20
  -9   1  -3    0.16    0.24
  10  -1   3    6.12    0.41
 -10  -1  -3    6.16    0.45
 -10   1  -3    6.31    0.44
  10   1   3    5.86    0.40
  11  -1   3    0.80    0.26
 -11  -1  -3    0.70    0.29
 -11   1  -3    0.67    0.30
  11   1   3    0.17    0.23
  12   1   3    0.78    0.27
 -11   2   3    0.88    0.34
  10  -2  -3   10.60    0.41
 -10  -2   3   10.50    0.49
 -10   2   3    9.66    0.58
  10   2  -3   10.47    0.49
  -9  -2   3    1.00    0.19
  -9  -2   3    1.07    0.23
   9  -2  -3    0.80    0.16
  -9   2   3    0.77    0.27
   9   2  -3    0.86    0.19
   8  -2  -3    0.15    0.14
  -8  -2   3   -0.08    0.19
  -8  -2   3    0.06    0.15
  -8  -2   3   -0.17    0.12
  -8   2   3    0.07    0.19
  -8   2   3    0.00    0.22
  -7  -2   3    2.53    0.21
   7  -2  -3    2.46    0.19
   7  -2  -3    2.60    0.22
  -7  -2   3    2.57    0.26
  -7  -2   3    2.38    0.23
  -7  -2   3    2.46    0.18
  -7   2   3    2.21    0.22
  -7   2   3    2.24    0.27
  -6  -2   3   17.30    0.56
  -6  -2   3   18.08    0.55
  -6  -2   3   17.48    0.50
  -6  -2   3   17.84    0.62
   6  -2  -3   17.96    0.54
  -6   2   3   17.93    0.56
  -6   2   3   17.05    0.63
  -6   2   3   17.42    0.52
  -5  -2   3    2.04    0.18
  -5  -2   3    1.86    0.14
   5  -2  -3    1.95    0.17
  -5  -2   3    1.79    0.19
  -5  -2   3    2.07    0.18
  -5   2   3    2.17    0.18
  -5   2   3    1.84    0.17
  -5   2   3    2.02    0.20
  -4  -2   3   12.33    0.41
  -4  -2   3   12.40    0.36
  -4  -2   3   11.96    0.40
   4  -2  -3   12.60    0.39
  -4  -2   3   11.79    0.44
  -4   2   3   12.83    0.41
  -4   2   3   13.02    0.45
  -4   2   3   13.23    0.38
  -3  -2   3    0.61    0.08
   3  -2  -3    0.51    0.09
  -3  -2   3    0.65    0.11
  -3  -2   3    0.37    0.09
  -3  -2   3    0.63    0.11
  -3   2   3    0.74    0.10
  -3   2   3    0.61    0.09
  -3   2   3    0.69    0.12
  -2  -2   3    4.52    0.16
  -2  -2   3    4.54    0.20
  -2  -2   3    4.41    0.20
   2  -2  -3    4.22    0.18
  -2   2   3    3.81    0.18
  -2   2   3    4.12    0.20
   2   2  -3    4.49    0.16
  -2   2   3    4.14    0.17
   1  -2  -3    7.64    0.25
  -1  -2   3    7.73    0.25
  -1   2   3    7.64    0.23
   1   2  -3    7.88    0.22
  -1   2   3    7.28    0.24
   0  -2  -3   10.01    0.29
   0  -2   3    8.89    0.28
   0  -2   3   10.34    0.25
   0  -2  -3    9.85    0.28
   0   2  -3   10.56    0.27
   0   2   3   10.58    0.28
   0   2  -3    9.96    0.29
   0   2   3    9.83    0.25
  -1  -2  -3   63.55    1.51
   1  -2   3   59.07    1.41
  -1  -2  -3   59.98    1.54
  -1   2  -3   59.71    1.62
   1   2   3   59.63    1.60
  -1   2  -3   60.87    1.50
  -2  -2  -3   14.60    0.41
  -2  -2  -3   15.12    0.45
   2  -2   3   15.17    0.38
  -2   2  -3   14.53    0.47
   2   2   3   15.22    0.44
  -2   2  -3   14.48    0.38
   2   2   3   14.91    0.36
  -2   2  -3   14.85    0.44
  -3  -2  -3   20.19    0.58
  -3  -2  -3   19.59    0.54
   3  -2   3   19.09    0.49
  -3   2  -3   19.31    0.62
   3   2   3   18.97    0.57
  -3   2  -3   19.09    0.56
  -3   2  -3   19.41    0.51
   3   2   3   19.76    0.48
  -4  -2  -3   20.93    0.63
   4  -2   3   20.49    0.53
  -4  -2  -3   20.72    0.58
   4   2   3   20.94    0.52
  -4   2  -3   20.59    0.62
  -4   2  -3   20.06    0.67
   4   2   3   20.19    0.62
  -4   2  -3   20.76    0.55
  -5  -2  -3   22.81    0.70
  -5  -2  -3   23.22    0.65
   5  -2   3   23.23    0.60
  -5   2  -3   23.32    0.63
  -5   2  -3   23.53    0.76
   5   2   3   23.17    0.71
   5   2   3   22.70    0.58
  -5   2  -3   22.91    0.69
  -6  -2  -3   35.11    0.97
  -6  -2  -3   34.28    1.01
   6  -2   3   36.24    0.90
   6   2   3   34.39    1.04
   6   2   3   35.49    0.88
  -6   2  -3   35.68    0.95
  -6   2  -3   35.66    1.01
  -6   2  -3   37.10    1.11
  -7  -2  -3    0.42    0.20
   7  -2   3    0.40    0.11
  -7  -2  -3    0.30    0.13
   7   2   3    0.06    0.15
   7   2   3    0.24    0.10
  -7   2  -3    0.25    0.20
  -7   2  -3    0.36    0.23
  -8  -2  -3    5.69    0.39
   8  -2   3    6.23    0.27
  -8   2  -3    6.18    0.41
   8   2   3    5.44    0.36
  -8   2  -3    6.08    0.46
  -9  -2  -3    0.13    0.24
   9  -2   3    0.15    0.13
  -9   2  -3    0.21    0.24
  -9   2  -3    0.18    0.27
   9   2   3    0.11    0.19
 -10  -2  -3    1.46    0.30
 -10   2  -3    1.58    0.30
  10   2   3    1.41    0.25
  11  -2   3    0.95    0.26
 -11  -2  -3    0.92    0.31
  11   2   3    0.21    0.24
 -12  -2  -3    1.04    0.32
  12   2   3    0.82    0.28
 -11   3   3    0.58    0.33
 -10  -3   3    0.64    0.24
  10  -3  -3    0.36    0.17
 -10   3   3    0.73    0.30
  10   3  -3    0.68    0.20
  -9  -3   3    2.17    0.26
  -9  -3   3    2.00    0.23
   9  -3  -3    2.02    0.20
   9   3  -3    2.03    0.23
  -9   3   3    2.46    0.33
   8  -3  -3    1.40    0.18
  -8  -3   3    1.67    0.20
  -8  -3   3    1.38    0.23
  -8  -3   3    1.64    0.17
   8   3  -3    1.63    0.20
  -8   3   3    1.57    0.28
  -8   3   3    1.56    0.22
   7  -3  -3    2.14    0.18
  -7  -3   3    2.29    0.17
   7  -3  -3    2.50    0.20
  -7  -3   3    2.53    0.23
  -7  -3   3    2.22    0.21
  -7   3   3    2.46    0.23
  -7   3   3    2.71    0.28
  -6  -3   3    1.24    0.16
  -6  -3   3    1.20    0.13
   6  -3  -3    1.25    0.15
  -6  -3   3    1.13    0.17
  -6   3   3    0.95    0.17
  -6   3   3    1.16    0.21
   5  -3  -3    4.35    0.21
  -5  -3   3    3.32    0.27
  -5  -3   3    3.81    0.25
  -5  -3   3    4.04    0.20
  -5  -3   3    3.91    0.22
  -5   3   3    4.46    0.26
  -5   3   3    4.29    0.29
  -5   3   3    4.06    0.22
  -4  -3   3    1.63    0.16
  -4  -3   3    1.85    0.12
   4  -3  -3    1.83    0.15
  -4  -3   3    1.59    0.16
  -4  -3   3    1.78    0.15
  -4   3   3    1.88    0.18
  -4   3   3    1.63    0.14
  -4   3   3    1.89    0.15
   3  -3  -3   21.02    0.58
  -3  -3   3   20.51    0.53
  -3  -3   3   20.52    0.59
  -3   3   3   21.70    0.55
  -3   3   3   21.83    0.57
  -3   3   3   21.51    0.64
  -2  -3   3   87.03    2.00
   2  -3  -3   86.75    2.19
  -2  -3   3   84.91    2.20
  -2   3   3   84.48    2.02
  -2   3   3   88.55    2.11
  -2   3   3   86.93    2.30
   2   3  -3   85.41    2.12
   2   3  -3   85.51    2.27
  -1  -3   3   52.05    1.24
   1  -3  -3   53.45    1.37
  -1  -3   3   52.68    1.37
   1   3  -3   51.80    1.40
  -1   3   3   55.91    1.42
  -1   3   3   53.49    1.26
   1   3  -3   53.42    1.31
   0  -3   3    0.01    0.07
   0  -3  -3    0.00    0.07
   0  -3   3    0.05    0.04
   0  -3  -3    0.03    0.08
   0   3   3    0.02    0.06
   0   3  -3    0.01    0.07
   0   3   3    0.03    0.05
   0   3  -3    0.17    0.06
   1  -3   3    1.21    0.07
  -1  -3  -3    1.61    0.10
   1  -3   3    1.34    0.10
  -1  -3  -3    1.47    0.13
  -1   3  -3    1.47    0.13
  -1   3  -3    1.41    0.10
   1   3   3    1.89    0.11
   2  -3   3    3.03    0.14
  -2  -3  -3    3.12    0.15
  -2  -3  -3    2.88    0.21
   2   3   3    2.95    0.15
  -2   3  -3    3.09    0.19
  -2   3  -3    3.07    0.23
  -3  -3  -3   19.39    0.57
   3  -3   3   19.06    0.49
  -3  -3  -3   19.19    0.53
  -3   3  -3   19.48    0.61
  -3   3  -3   19.48    0.55
   3   3   3   17.76    0.55
   3   3   3   18.87    0.46
  -4  -3  -3   11.64    0.42
   4  -3   3   11.17    0.33
  -4  -3  -3   11.05    0.36
  -4   3  -3   10.69    0.40
  -4   3  -3   11.16    0.45
   4   3   3   11.13    0.30
   4   3   3   10.91    0.38
  -5  -3  -3   18.28    0.53
  -5  -3  -3   17.70    0.57
   5  -3   3   17.87    0.48
   5   3   3   17.75    0.46
   5   3   3   17.25    0.57
  -5   3  -3   18.06    0.57
  -5   3  -3   17.65    0.63
   6  -3   3   11.00    0.35
  -6  -3  -3   11.50    0.45
  -6  -3  -3   11.61    0.39
  -6   3  -3   11.31    0.51
   6   3   3   11.43    0.34
   6   3   3   11.38    0.43
  -6   3  -3   11.41    0.46
  -7  -3  -3    5.18    0.36
  -7  -3  -3    5.67    0.27
   7  -3   3    5.93    0.26
  -7   3  -3    5.86    0.37
  -7   3  -3    6.79    0.42
   7   3   3    5.60    0.32
  -8  -3  -3    1.19    0.25
   8  -3   3    1.39    0.16
  -8   3  -3    0.91    0.27
  -8   3  -3    0.92    0.25
   8   3   3    1.09    0.20
  -9  -3  -3    0.61    0.25
   9  -3   3    0.67    0.14
   9   3   3    0.60    0.20
  -9   3  -3    0.55    0.25
  -9   3  -3    0.16    0.27
 -10  -3  -3    0.05    0.25
 -10   3  -3    0.66    0.27
  10   3   3    0.04    0.20
 -10   3  -3    0.03    0.29
 -11  -3  -3    1.16    0.31
  11   3   3    0.94    0.26
  12   3   3   -0.15    0.24
  11  -4  -3    0.53    0.19
 -11   4   3    0.51    0.32
 -10  -4   3    0.88    0.25
  10  -4  -3    0.68    0.18
 -10   4   3    0.42    0.29
  -9  -4   3    2.58    0.24
   9  -4  -3    2.82    0.23
  -9  -4   3    2.54    0.28
  -9   4   3    2.37    0.33
   9   4  -3    2.31    0.23
  -8  -4   3    2.25    0.26
   8  -4  -3    2.64    0.21
  -8  -4   3    2.47    0.23
  -8   4   3    2.65    0.31
   8   4  -3    2.79    0.23
  -7  -4   3    3.59    0.30
  -7  -4   3    3.37    0.22
   7  -4  -3    2.68    0.23
  -7  -4   3    2.90    0.25
   7  -4  -3    3.32    0.24
  -7   4   3    3.97    0.30
   7   4  -3    2.81    0.25
  -7   4   3    3.56    0.31
   6  -4  -3   30.76    0.86
   6  -4  -3   31.43    0.82
  -6  -4   3   31.32    0.89
  -6  -4   3   30.84    0.89
  -6  -4   3   32.57    0.80
  -6   4   3   30.13    0.97
   6   4  -3   30.50    0.90
  -6   4   3   31.56    0.88
  -5  -4   3   22.19    0.56
  -5  -4   3   20.21    0.63
  -5  -4   3   21.91    0.63
   5  -4  -3   20.49    0.61
  -5   4   3   21.52    0.61
   5   4  -3   20.79    0.63
  -5   4   3   21.04    0.69
  -4  -4   3    2.11    0.17
  -4  -4   3    1.65    0.15
   4  -4  -3    1.35    0.13
  -4  -4   3    1.81    0.14
  -4   4   3    1.75    0.18
   4   4  -3    1.69    0.15
  -4   4   3    1.74    0.15
  -4   4   3    1.75    0.14
  -3  -4   3   30.38    0.79
  -3  -4   3   30.02    0.70
   3  -4  -3   28.27    0.77
   3   4  -3   27.93    0.75
  -3   4   3   27.42    0.83
  -3   4   3   28.03    0.75
   3   4  -3   28.71    0.79
   2  -4  -3   45.63    1.16
  -2  -4   3   44.26    1.05
  -2  -4   3   45.11    1.17
   2   4  -3   44.27    1.12
  -2   4   3   44.16    1.08
   2   4  -3   43.51    1.18
  -2   4   3   45.81    1.11
  -2   4   3   44.48    1.22
  -1  -4   3   27.01    0.74
  -1  -4   3   26.53    0.66
   1  -4  -3   27.92    0.74
  -1   4   3   27.73    0.68
   1   4  -3   27.65    0.70
   1   4  -3   27.63    0.73
  -1   4   3   28.40    0.76
  -1   4   3   28.88    0.68
   0  -4   3   15.70    0.45
   0  -4  -3   16.73    0.47
   0  -4   3   16.89    0.41
   0   4   3   16.77    0.47
   0   4  -3   16.72    0.47
   0   4  -3   18.42    0.44
  -1  -4  -3   51.90    1.36
  -1  -4  -3   54.05    1.33
  -1  -4  -3   54.44    1.22
   1  -4   3   51.14    1.34
  -1   4  -3   53.68    1.31
   1   4   3   51.98    1.40
  -1   4  -3   52.80    1.43
   2  -4   3   11.16    0.30
  -2  -4  -3   10.98    0.33
  -2  -4  -3   10.59    0.36
  -2   4  -3   10.53    0.39
   2   4   3   10.90    0.33
  -2   4  -3   11.21    0.34
  -3  -4  -3    0.23    0.09
   3  -4   3    0.05    0.07
   3  -4   3    0.07    0.05
  -3  -4  -3    0.24    0.13
  -3   4  -3    0.22    0.12
   3   4   3    0.28    0.09
   3   4   3    0.18    0.04
  -3   4  -3    0.18    0.13
  -4  -4  -3   44.57    1.21
   4  -4   3   46.19    1.10
  -4  -4  -3   45.19    1.20
   4  -4   3   44.46    1.16
   4   4   3   45.31    1.07
  -4   4  -3   46.27    1.31
  -4   4  -3   45.32    1.20
   4   4   3   45.20    1.25
  -5  -4  -3   10.47    0.41
   5  -4   3   10.65    0.33
  -5  -4  -3   10.57    0.36
   5  -4   3   10.41    0.32
  -5   4  -3   11.65    0.41
  -5   4  -3   10.78    0.46
   5   4   3   10.80    0.39
   5   4   3   10.66    0.30
   6  -4   3   48.39    1.19
  -6  -4  -3   49.59    1.31
  -6  -4  -3   46.51    1.32
   6   4   3   50.43    1.16
   6   4   3   48.16    1.36
  -6   4  -3   47.40    1.44
  -6   4  -3   47.12    1.31
   7  -4   3    0.05    0.11
  -7  -4  -3    0.15    0.14
  -7  -4  -3    0.46    0.21
  -7   4  -3    0.09    0.20
  -7   4  -3    0.00    0.22
   7   4   3    0.09    0.14
  -8  -4  -3    1.20    0.18
  -8  -4  -3    1.46    0.26
   8  -4   3    1.32    0.16
  -8   4  -3    1.40    0.26
  -8   4  -3    1.58    0.30
   8   4   3    1.11    0.20
   9  -4   3    3.06    0.23
  -9  -4  -3    3.29    0.33
   9   4   3    3.15    0.28
  -9   4  -3    3.41    0.33
  -9   4  -3    3.23    0.38
 -10  -4  -3    1.45    0.29
  10  -4   3    1.29    0.18
 -10   4  -3    1.14    0.34
  10   4   3    1.36    0.24
 -11  -4  -3    1.62    0.33
  11   4   3    1.71    0.27
  11  -5  -3    1.34    0.22
  11   5  -3    1.21    0.22
 -11   5   3    1.82    0.37
  10  -5  -3   13.18    0.48
 -10   5   3   13.12    0.66
  -9  -5   3    0.34    0.18
  -9  -5   3    0.48    0.22
   9  -5  -3    0.31    0.15
  -9   5   3    0.40    0.27
   8  -5  -3    0.03    0.14
  -8  -5   3    0.12    0.17
  -8  -5   3    0.02    0.19
   8   5  -3    0.10    0.14
  -8   5   3    0.37    0.24
  -7  -5   3   12.61    0.39
  -7  -5   3   12.26    0.45
  -7  -5   3   11.41    0.47
   7  -5  -3   11.70    0.42
  -7   5   3   11.32    0.53
  -7   5   3   12.76    0.47
   7   5  -3   12.08    0.44
  -6  -5   3    0.31    0.15
   6  -5  -3   -0.20    0.13
  -6  -5   3   -0.11    0.12
   6  -5  -3    0.02    0.11
  -6  -5   3    0.05    0.10
   6   5  -3    0.04    0.10
  -6   5   3    0.15    0.15
  -6   5   3   -0.07    0.17
  -5  -5   3   18.63    0.57
   5  -5  -3   18.34    0.54
  -5  -5   3   18.80    0.58
   5  -5  -3   18.28    0.53
  -5  -5   3   19.48    0.50
  -5   5   3   17.94    0.63
   5   5  -3   17.81    0.56
  -5   5   3   19.15    0.55
   4  -5  -3    7.32    0.27
  -4  -5   3    7.74    0.25
  -4  -5   3    7.37    0.28
   4  -5  -3    8.06    0.28
   4   5  -3    6.80    0.26
  -4   5   3    7.28    0.34
   4   5  -3    7.58    0.27
  -4   5   3    7.47    0.29
  -3  -5   3   21.66    0.54
  -3  -5   3   22.32    0.62
   3  -5  -3   21.23    0.60
   3   5  -3   21.19    0.60
   3   5  -3   21.46    0.59
  -3   5   3   22.50    0.58
  -3   5   3   21.76    0.66
  -2  -5   3   25.95    0.61
   2  -5  -3   24.91    0.69
  -2  -5   3   24.95    0.70
   2   5  -3   26.42    0.66
  -2   5   3   25.05    0.65
   2   5  -3   25.20    0.68
  -2   5   3   25.85    0.73
   1  -5  -3   17.39    0.49
  -1  -5   3   17.69    0.50
  -1  -5   3   17.76    0.43
   1  -5  -3   16.99    0.45
   1   5  -3   18.69    0.48
   1   5  -3   18.11    0.47
  -1   5   3   17.98    0.45
  -1   5   3   17.74    0.51
   0  -5  -3    4.39    0.15
   0  -5  -3    4.06    0.18
   0  -5   3    4.46    0.18
   0  -5   3    4.62    0.15
   0   5   3    4.88    0.17
   0   5  -3    4.69    0.16
   0   5   3    4.45    0.15
   0   5  -3    4.45    0.18
   1  -5   3   50.43    1.23
   1  -5   3   51.13    1.33
  -1  -5  -3   51.55    1.35
  -1  -5  -3   53.32    1.32
  -1  -5  -3   54.74    1.21
   1   5   3   52.88    1.39
  -1   5  -3   53.48    1.42
  -1   5  -3   51.70    1.31
  -2  -5  -3   11.55    0.35
  -2  -5  -3   11.64    0.39
   2  -5   3   11.58    0.32
   2  -5   3   11.33    0.31
  -2   5  -3   11.61    0.35
   2   5   3   11.40    0.34
  -2   5  -3   11.71    0.41
  -3  -5  -3   19.27    0.55
  -3  -5  -3   19.78    0.58
   3  -5   3   19.31    0.50
   3  -5   3   18.53    0.49
  -3   5  -3   18.28    0.61
   3   5   3   19.18    0.55
  -3   5  -3   18.85    0.55
   4  -5   3    9.30    0.30
   4  -5   3    8.99    0.27
  -4  -5  -3    9.29    0.33
  -4  -5  -3    9.84    0.38
  -4   5  -3    9.44    0.41
  -4   5  -3    9.71    0.37
   4   5   3    9.70    0.26
   4   5   3    9.67    0.33
  -5  -5  -3    9.21    0.39
   5  -5   3    9.45    0.31
  -5  -5  -3    9.29    0.34
  -5   5  -3    9.33    0.43
  -5   5  -3    9.93    0.39
   5   5   3   10.05    0.35
   5   5   3    9.44    0.27
  -6  -5  -3    7.91    0.39
  -6  -5  -3    8.04    0.33
   6  -5   3    7.79    0.29
  -6   5  -3    7.94    0.38
   6   5   3    7.90    0.33
  -6   5  -3    7.14    0.41
  -7  -5  -3    1.29    0.23
   7  -5   3    1.80    0.16
  -7  -5  -3    1.81    0.19
  -7   5  -3    1.45    0.26
  -7   5  -3    1.58    0.25
   7   5   3    1.42    0.18
   8  -5   3    6.71    0.29
  -8  -5  -3    5.80    0.40
  -8  -5  -3    6.95    0.34
   8   5   3    6.29    0.35
  -8   5  -3    6.09    0.46
  -8   5  -3    6.31    0.41
  -9  -5  -3    3.66    0.34
   9  -5   3    4.29    0.25
  -9   5  -3    4.13    0.41
  -9   5  -3    4.07    0.35
   9   5   3    4.21    0.32
  10  -5   3    3.37    0.26
 -10  -5  -3    3.93    0.36
 -10   5  -3    4.11    0.44
  10   5   3    4.07    0.34
 -11  -5  -3    5.55    0.45
  11   5   3    4.46    0.38
 -11   5  -3    4.75    0.50
  11  -6  -3    0.17    0.18
 -11   6   3   -0.28    0.30
  11   6  -3    0.03    0.19
 -10  -6   3    4.73    0.35
  10  -6  -3    4.44    0.31
  10   6  -3    4.93    0.32
 -10   6   3    5.22    0.48
  -9  -6   3    9.76    0.42
   9  -6  -3    9.24    0.38
  -9   6   3    8.58    0.52
  -8  -6   3   17.09    0.58
   8  -6  -3   16.35    0.53
   8   6  -3   16.69    0.57
  -8   6   3   16.94    0.69
   7  -6  -3    4.90    0.27
  -7  -6   3    4.28    0.28
   7   6  -3    4.63    0.27
  -7   6   3    4.99    0.38
   6  -6  -3    0.26    0.13
  -6  -6   3    0.24    0.14
   6  -6  -3    0.21    0.13
  -6  -6   3    0.38    0.10
  -6   6   3    0.25    0.19
  -6   6   3    0.13    0.14
   6   6  -3    0.07    0.10
  -5  -6   3   14.75    0.39
   5  -6  -3   13.46    0.43
   5  -6  -3   13.42    0.43
  -5  -6   3   13.67    0.46
  -5   6   3   14.62    0.45
   5   6  -3   13.44    0.44
  -5   6   3   13.83    0.52
   5   6  -3   13.89    0.43
  -4  -6   3    2.41    0.15
   4  -6  -3    2.71    0.17
  -4  -6   3    2.42    0.20
   4  -6  -3    2.45    0.19
  -4   6   3    2.48    0.23
   4   6  -3    2.42    0.15
  -4   6   3    2.90    0.20
   4   6  -3    2.61    0.19
   3  -6  -3    2.21    0.17
  -3  -6   3    2.26    0.14
  -3  -6   3    2.09    0.18
   3  -6  -3    2.08    0.16
  -3   6   3    2.47    0.21
   3   6  -3    2.28    0.16
   3   6  -3    2.06    0.12
  -3   6   3    2.51    0.17
   2  -6  -3   25.75    0.66
   2  -6  -3   26.11    0.70
  -2  -6   3   25.77    0.63
  -2  -6   3   25.74    0.72
  -2   6   3   26.61    0.66
  -2   6   3   26.36    0.75
   2   6  -3   27.07    0.70
   2   6  -3   26.01    0.68
   1  -6  -3   21.23    0.53
  -1  -6   3   19.71    0.58
   1  -6  -3   20.92    0.58
  -1  -6   3   20.17    0.51
  -1   6   3   21.97    0.60
   1   6  -3   20.63    0.55
   1   6  -3   21.51    0.57
  -1   6   3   22.28    0.53
   0  -6   3   11.07    0.30
   0  -6   3   11.41    0.34
   0  -6  -3   11.63    0.35
   0  -6  -3   12.14    0.31
   0   6   3   11.70    0.31
   0   6  -3   11.52    0.35
   0   6   3   11.41    0.34
   0   6  -3   11.86    0.32
  -1  -6  -3    0.71    0.09
   1  -6   3    0.80    0.08
  -1  -6  -3    0.88    0.05
   1  -6   3    0.78    0.07
   1   6   3    0.70    0.07
  -1   6  -3    1.08    0.10
  -1   6  -3    0.95    0.11
   2  -6   3   29.20    0.72
  -2  -6  -3   30.57    0.80
  -2  -6  -3   29.17    0.80
   2  -6   3   29.37    0.76
   2   6   3   28.76    0.80
  -2   6  -3   30.19    0.77
  -2   6  -3   29.30    0.85
   3  -6   3    6.62    0.24
  -3  -6  -3    7.03    0.27
   3  -6   3    7.16    0.20
  -3  -6  -3    6.71    0.31
  -3   6  -3    6.90    0.34
  -3   6  -3    6.72    0.29
   3   6   3    6.95    0.25
   4  -6   3    1.20    0.09
  -4  -6  -3    1.40    0.17
  -4  -6  -3    1.24    0.14
   4  -6   3    1.30    0.11
  -4   6  -3    1.38    0.16
  -4   6  -3    1.27    0.19
   4   6   3    1.17    0.12
  -5  -6  -3    0.70    0.17
   5  -6   3    0.63    0.11
  -5  -6  -3    0.51    0.13
   5   6   3    0.69    0.12
   5   6   3    0.51    0.06
  -5   6  -3    0.85    0.17
  -5   6  -3    0.82    0.19
  -6  -6  -3   16.34    0.58
  -6  -6  -3   16.54    0.53
   6  -6   3   16.34    0.48
  -6   6  -3   16.72    0.57
  -6   6  -3   17.21    0.65
   6   6   3   17.09    0.55
   7  -6   3   11.48    0.39
  -7  -6  -3   11.04    0.42
  -7  -6  -3   10.99    0.49
  -7   6  -3   11.85    0.50
   7   6   3   11.49    0.44
  -7   6  -3   11.95    0.55
   8  -6   3    5.11    0.26
  -8  -6  -3    4.73    0.30
  -8  -6  -3    4.56    0.37
  -8   6  -3    5.36    0.44
   8   6   3    4.91    0.30
  -8   6  -3    4.98    0.39
  -9  -6  -3    2.70    0.31
   9  -6   3    3.15    0.23
  -9   6  -3    2.92    0.32
  -9   6  -3    3.15    0.38
   9   6   3    2.99    0.28
  10  -6   3    1.93    0.21
 -10  -6  -3    1.85    0.30
 -10   6  -3    1.85    0.38
  10   6   3    1.80    0.25
 -11  -6  -3    0.95    0.30
 -11   6  -3    0.79    0.37
  11  -7  -3    2.27    0.26
  11   7  -3    2.70    0.27
 -11   7   3    2.67    0.41
 -10  -7   3    0.69    0.23
  10  -7  -3    0.59    0.19
 -10   7   3    0.78    0.32
  10   7  -3    0.61    0.19
  -9  -7   3    0.20    0.18
   9  -7  -3    0.26    0.16
   9   7  -3    0.15    0.16
  -9   7   3   -0.06    0.27
   8  -7  -3    5.79    0.31
  -8  -7   3    6.42    0.34
  -8   7   3    6.16    0.45
   8   7  -3    6.40    0.32
  -7  -7   3    9.32    0.39
   7  -7  -3    9.87    0.37
   7   7  -3    9.37    0.37
   7   7  -3    9.58    0.38
  -7   7   3    9.53    0.49
  -6  -7   3   21.15    0.55
  -6  -7   3   19.99    0.64
   6  -7  -3   20.13    0.59
   6  -7  -3   20.46    0.61
   6   7  -3   20.89    0.61
  -6   7   3   20.09    0.72
   6   7  -3   19.99    0.61
  -6   7   3   21.06    0.62
   5  -7  -3    5.50    0.24
   5  -7  -3    5.71    0.26
  -5  -7   3    6.26    0.22
  -5  -7   3    5.62    0.28
  -5   7   3    5.09    0.33
   5   7  -3    5.86    0.23
   5   7  -3    5.54    0.26
  -5   7   3    5.89    0.28
  -4  -7   3    9.18    0.27
  -4  -7   3    8.94    0.34
   4  -7  -3    9.04    0.31
   4  -7  -3    8.83    0.31
   4   7  -3    9.12    0.29
  -4   7   3    9.07    0.38
  -4   7   3    9.44    0.32
   4   7  -3    9.21    0.31
  -3  -7   3   12.54    0.34
   3  -7  -3   12.84    0.40
  -3  -7   3   12.88    0.42
   3  -7  -3   13.65    0.39
  -3   7   3   12.87    0.45
  -3   7   3   13.06    0.38
   3   7  -3   12.75    0.39
   3   7  -3   12.57    0.37
  -2  -7   3    3.56    0.13
  -2  -7   3    3.59    0.18
   2  -7  -3    2.97    0.18
   2  -7  -3    3.36    0.17
  -2   7   3    2.80    0.20
   2   7  -3    3.40    0.16
  -2   7   3    3.30    0.15
   2   7  -3    3.84    0.13
  -1  -7   3    2.49    0.15
  -1  -7   3    2.67    0.12
   1  -7  -3    3.16    0.17
   1  -7  -3    3.35    0.15
   1   7  -3    2.95    0.14
   1   7  -3    2.96    0.13
  -1   7   3    3.30    0.12
  -1   7   3    3.02    0.16
   0  -7   3   -0.02    0.05
   0  -7  -3    0.01    0.06
   0  -7   3   -0.05    0.08
   0  -7  -3   -0.02    0.08
   0   7   3    0.00    0.06
   0   7   3    0.02    0.06
   0   7  -3    0.08    0.07
   0   7  -3    0.02    0.06
   1  -7   3   35.96    0.95
   1  -7   3   36.39    0.88
  -1  -7  -3   37.94    0.86
  -1  -7  -3   37.38    0.98
   1   7   3   36.70    0.93
  -1   7  -3   37.40    0.93
   1   7   3   35.96    0.98
  -1   7  -3   35.14    1.01
  -2  -7  -3    4.86    0.25
  -2  -7  -3    5.22    0.13
  -2  -7  -3    4.76    0.22
   2  -7   3    4.74    0.19
   2  -7   3    4.62    0.17
   2   7   3    5.07    0.18
  -2   7  -3    4.88    0.26
  -2   7  -3    4.52    0.22
  -3  -7  -3    7.11    0.29
   3  -7   3    7.85    0.22
   3  -7   3    7.47    0.25
  -3  -7  -3    7.67    0.33
   3   7   3    7.32    0.26
  -3   7  -3    7.22    0.30
  -3   7  -3    7.67    0.35
   4  -7   3    0.63    0.06
  -4  -7  -3    0.57    0.15
   4  -7   3    0.47    0.10
  -4  -7  -3    0.51    0.11
  -4  -7  -3    0.46    0.05
  -4   7  -3    0.47    0.16
  -4   7  -3    0.40    0.14
   4   7   3    0.42    0.09
  -5  -7  -3    2.35    0.22
   5  -7   3    2.19    0.17
  -5  -7  -3    2.39    0.20
  -5   7  -3    2.29    0.21
   5   7   3    2.45    0.19
  -5   7  -3    2.65    0.25
   6  -7   3    0.89    0.13
  -6  -7  -3    1.07    0.20
  -6  -7  -3    1.05    0.16
  -6   7  -3    0.97    0.23
  -6   7  -3    1.01    0.20
   6   7   3    0.97    0.14
  -7  -7  -3    2.78    0.28
   7  -7   3    3.09    0.22
  -7  -7  -3    3.20    0.26
  -7   7  -3    3.34    0.30
  -7   7  -3    2.58    0.32
   7   7   3    3.38    0.25
  -8  -7  -3    0.00    0.21
  -8  -7  -3   -0.18    0.16
   8  -7   3    0.12    0.13
  -8   7  -3    0.17    0.23
  -8   7  -3   -0.36    0.24
   8   7   3   -0.04    0.14
  -9  -7  -3    0.53    0.19
  -9  -7  -3    0.11    0.23
   9  -7   3    0.24    0.15
   9   7   3    0.49    0.18
  -9   7  -3    0.20    0.29
 -10  -7  -3    8.30    0.48
  10  -7   3    8.82    0.37
 -10   7  -3    8.75    0.59
  10   7   3    8.82    0.43
 -11  -7  -3    0.20    0.27
  11  -7   3    0.10    0.18
 -11   7  -3   -0.09    0.34
  11  -8  -3    4.33    0.33
  11   8  -3    4.47    0.34
 -11   8   3    3.76    0.46
 -10  -8   3    0.23    0.20
  10  -8  -3   -0.10    0.17
 -10   8   3    0.00    0.30
  10   8  -3   -0.04    0.18
  -9  -8   3    2.41    0.26
   9  -8  -3    2.33    0.23
  -9   8   3    2.59    0.35
   9   8  -3    2.22    0.23
   8  -8  -3    0.45    0.16
  -8  -8   3    0.48    0.18
  -8   8   3    0.79    0.26
   8   8  -3    0.59    0.17
   7  -8  -3    6.06    0.29
  -7  -8   3    6.08    0.32
   7   8  -3    5.96    0.31
  -7   8   3    5.97    0.41
   7   8  -3    5.55    0.27
   6  -8  -3   10.46    0.36
   6  -8  -3    9.81    0.37
  -6  -8   3   10.16    0.40
  -6   8   3    9.57    0.47
   6   8  -3    9.83    0.35
   6   8  -3    9.84    0.37
   5  -8  -3    2.64    0.20
   5  -8  -3    2.10    0.17
  -5  -8   3    2.51    0.16
  -5  -8   3    2.43    0.22
  -5   8   3    2.33    0.23
   5   8  -3    2.30    0.20
  -5   8   3    2.83    0.23
   5   8  -3    2.25    0.15
  -4  -8   3    5.29    0.24
   4  -8  -3    4.91    0.23
   4  -8  -3    5.01    0.23
  -4  -8   3    5.50    0.19
  -4   8   3    4.94    0.24
   4   8  -3    5.37    0.24
  -4   8   3    4.53    0.29
   4   8  -3    5.27    0.19
  -3  -8   3    0.19    0.10
   3  -8  -3    0.06    0.10
  -3  -8   3    0.21    0.06
   3  -8  -3   -0.03    0.09
   3   8  -3    0.22    0.05
  -3   8   3    0.16    0.13
   3   8  -3    0.12    0.09
  -3   8   3    0.07    0.09
  -2  -8   3   17.04    0.42
   2  -8  -3   16.99    0.46
   2  -8  -3   17.21    0.49
  -2  -8   3   16.43    0.51
  -2   8   3   16.93    0.53
  -2   8   3   16.81    0.45
   2   8  -3   17.15    0.47
   2   8  -3   16.47    0.47
   1  -8  -3    6.67    0.23
  -1  -8   3    6.89    0.20
  -1  -8   3    7.04    0.26
   1  -8  -3    6.68    0.26
  -1   8   3    6.85    0.26
  -1   8   3    6.82    0.21
   1   8  -3    7.15    0.23
   1   8  -3    7.16    0.23
   0  -8  -3   19.41    0.55
   0  -8   3   19.43    0.49
   0  -8   3   18.72    0.54
   0  -8  -3   19.62    0.49
   0   8   3   20.36    0.56
   0   8  -3   20.12    0.52
   0   8  -3   18.93    0.56
   0   8   3   19.52    0.51
   1  -8   3    9.35    0.30
  -1  -8  -3    9.83    0.25
   1  -8   3    9.20    0.28
  -1  -8  -3    9.86    0.32
  -1   8  -3    9.90    0.30
   1   8   3    9.45    0.29
   1   8   3    9.94    0.29
  -1   8  -3    9.03    0.34
   2  -8   3   70.05    1.78
  -2  -8  -3   67.50    1.81
   2  -8   3   70.47    1.65
  -2  -8  -3   71.53    1.61
   2   8   3   69.49    1.85
  -2   8  -3   70.80    1.75
  -2   8  -3   67.93    1.90
   3  -8   3   10.97    0.33
  -3  -8  -3   10.74    0.39
  -3  -8  -3   10.06    0.37
   3  -8   3   11.50    0.31
  -3   8  -3   10.86    0.37
  -3   8  -3   10.89    0.43
   3   8   3   10.75    0.34
   4  -8   3    5.62    0.23
   4  -8   3    5.93    0.19
  -4  -8  -3    5.77    0.30
  -4  -8  -3    5.99    0.26
  -4   8  -3    5.45    0.28
   4   8   3    5.81    0.23
  -4   8  -3    5.03    0.33
  -5  -8  -3    0.29    0.16
   5  -8   3    0.23    0.10
  -5  -8  -3    0.50    0.14
  -5   8  -3    0.22    0.18
   5   8   3    0.38    0.11
  -5   8  -3    0.62    0.17
  -6  -8  -3    2.05    0.20
  -6  -8  -3    1.93    0.23
   6  -8   3    1.54    0.15
   6   8   3    2.01    0.17
  -6   8  -3    1.91    0.23
  -6   8  -3    1.89    0.26
  -7  -8  -3    1.37    0.19
   7  -8   3    1.25    0.16
  -7  -8  -3    1.19    0.23
  -7   8  -3    1.47    0.28
  -7   8  -3    1.46    0.24
   7   8   3    1.44    0.17
  -8  -8  -3    3.41    0.27
  -8  -8  -3    3.50    0.31
   8  -8   3    3.36    0.23
  -8   8  -3    3.52    0.32
  -8   8  -3    2.97    0.36
   8   8   3    3.28    0.27
   9  -8   3    0.53    0.16
  -9  -8  -3    0.26    0.24
  -9  -8  -3    0.46    0.20
  -9   8  -3    0.47    0.30
   9   8   3    0.15    0.17
  10  -8   3    2.52    0.23
 -10  -8  -3    2.11    0.32
 -10   8  -3    2.59    0.41
 -11  -8  -3    7.12    0.49
  11  -8   3    6.62    0.36
 -11   8  -3    7.11    0.60
  11  -9  -3    0.01    0.19
  11   9  -3   -0.01    0.20
 -11   9   3   -0.52    0.32
 -10  -9   3    1.06    0.24
  10  -9  -3    0.70    0.19
  10   9  -3    0.62    0.20
 -10   9   3    0.87    0.33
  -9  -9   3    1.24    0.23
   9  -9  -3    1.35    0.20
  -9   9   3    1.31    0.32
   9   9  -3    1.12    0.20
   8  -9  -3    5.85    0.31
  -8  -9   3    5.76    0.34
  -8   9   3    6.51    0.46
   8   9  -3    5.42    0.31
  -7  -9   3   10.11    0.41
   7  -9  -3    9.87    0.37
   7   9  -3    9.03    0.38
  -7   9   3    8.38    0.49
   6  -9  -3    2.84    0.22
  -6  -9   3    3.01    0.25
   6   9  -3    2.71    0.20
   6   9  -3    2.67    0.19
  -6   9   3    2.54    0.28
   5  -9  -3    0.64    0.13
   5  -9  -3    0.80    0.13
  -5  -9   3    0.69    0.10
  -5  -9   3    0.58    0.15
  -5   9   3    0.88    0.19
   5   9  -3    0.55    0.09
  -5   9   3    0.52    0.14
   5   9  -3    0.61    0.13
  -4  -9   3    7.26    0.23
   4  -9  -3    7.36    0.27
   4  -9  -3    6.86    0.28
  -4  -9   3    6.75    0.30
  -4   9   3    7.09    0.34
   4   9  -3    6.78    0.28
   4   9  -3    7.00    0.24
  -4   9   3    6.98    0.28
  -3  -9   3    1.76    0.15
   3  -9  -3    1.48    0.13
   3  -9  -3    1.76    0.14
  -3  -9   3    1.89    0.12
  -3   9   3    1.63    0.12
   3   9  -3    1.77    0.15
   3   9  -3    1.92    0.11
  -3   9   3    1.77    0.17
  -2  -9   3   21.59    0.62
   2  -9  -3   20.49    0.59
  -2  -9   3   21.78    0.53
   2  -9  -3   20.60    0.56
   2   9  -3   21.46    0.58
  -2   9   3   21.03    0.65
   2   9  -3   22.01    0.58
  -2   9   3   21.05    0.56
   1  -9  -3   30.24    0.82
  -1  -9   3   29.71    0.83
   1  -9  -3   31.39    0.75
  -1  -9   3   29.89    0.73
  -1   9   3   31.09    0.86
   1   9  -3   29.94    0.83
  -1   9   3   30.94    0.77
   1   9  -3   29.77    0.79
   0  -9   3    3.74    0.18
   0  -9  -3    3.29    0.18
   0  -9  -3    3.87    0.15
   0  -9   3    3.90    0.15
   0   9   3    3.54    0.18
   0   9   3    3.66    0.15
   0   9  -3    3.48    0.19
   0   9  -3    3.77    0.17
   1  -9   3   38.44    1.03
  -1  -9  -3   38.73    1.04
  -1  -9  -3   39.62    0.92
   1  -9   3   38.93    0.94
  -1   9  -3   39.54    1.00
   1   9   3   39.48    1.06
   1   9   3   38.88    1.00
  -1   9  -3   38.79    1.09
   2  -9   3   48.00    1.16
  -2  -9  -3   48.26    1.11
   2  -9   3   48.03    1.24
  -2  -9  -3   46.02    1.27
  -2   9  -3   48.50    1.23
  -2   9  -3   49.15    1.34
   2   9   3   48.46    1.28
   2   9   3   46.91    1.22
  -3  -9  -3    6.47    0.27
   3  -9   3    6.14    0.20
   3  -9   3    5.80    0.23
  -3   9  -3    5.66    0.27
  -3   9  -3    6.06    0.32
   3   9   3    5.70    0.22
   4  -9   3    4.71    0.22
  -4  -9  -3    4.36    0.23
   4  -9   3    4.87    0.17
  -4  -9  -3    4.87    0.29
   4   9   3    4.63    0.21
  -4   9  -3    5.19    0.27
  -4   9  -3    4.45    0.32
  -5  -9  -3    0.17    0.16
   5  -9   3    0.11    0.11
  -5  -9  -3    0.22    0.14
   5   9   3    0.06    0.10
  -5   9  -3    0.33    0.17
  -5   9  -3    0.13    0.19
  -6  -9  -3   20.93    0.66
  -6  -9  -3   20.79    0.68
   6  -9   3   20.72    0.59
  -6   9  -3   19.95    0.76
   6   9   3   21.72    0.64
  -6   9  -3   20.58    0.67
  -7  -9  -3    1.56    0.25
   7  -9   3    1.81    0.18
  -7  -9  -3    1.96    0.22
  -7   9  -3    1.84    0.25
   7   9   3    2.23    0.19
  -7   9  -3    1.62    0.29
   8  -9   3   10.87    0.39
  -8  -9  -3   10.65    0.44
  -8  -9  -3   10.35    0.49
   8   9   3   10.09    0.42
  -8   9  -3   10.19    0.57
  -9  -9  -3    1.38    0.27
   9  -9   3    0.93    0.18
  -9  -9  -3    1.21    0.23
  -9   9  -3    1.12    0.32
   9   9   3    1.08    0.19
  10  -9   3    1.38    0.20
 -10  -9  -3    1.59    0.30
 -10   9  -3    1.25    0.37
  11  -9   3    6.03    0.34
  11 -10  -3    0.51    0.21
  11  10  -3    0.62    0.21
 -10 -10   3    0.52    0.22
  10 -10  -3    0.49    0.19
  10  10  -3    0.42    0.19
 -10  10   3    0.19    0.32
   9 -10  -3    0.20    0.17
  -9 -10   3    0.57    0.21
  -9  10   3    0.39    0.30
   9  10  -3    0.27    0.18
  -8 -10   3    0.82    0.21
   8 -10  -3    1.15    0.19
   8  10  -3    1.02    0.18
  -8  10   3    0.78    0.28
  -7 -10   3    3.59    0.29
   7 -10  -3    4.69    0.28
  -7  10   3    4.71    0.38
   7  10  -3    4.11    0.27
   6 -10  -3    1.44    0.17
  -6 -10   3    1.57    0.20
   6  10  -3    1.28    0.16
  -6  10   3    1.41    0.25
   5 -10  -3    0.73    0.14
   5 -10  -3    0.64    0.14
  -5 -10   3    0.67    0.16
   5  10  -3    0.58    0.13
  -5  10   3    0.55    0.19
   5  10  -3    0.65    0.09
  -4 -10   3    9.24    0.27
   4 -10  -3    9.16    0.33
  -4 -10   3    8.76    0.35
   4 -10  -3    8.78    0.32
  -4  10   3    9.04    0.32
   4  10  -3    9.23    0.28
  -4  10   3    8.48    0.39
   4  10  -3    8.13    0.31
  -3 -10   3   28.85    0.71
  -3 -10   3   29.69    0.83
   3 -10  -3   28.59    0.75
   3 -10  -3   29.15    0.80
  -3  10   3   28.68    0.76
   3  10  -3   29.98    0.79
  -3  10   3   28.72    0.87
   3  10  -3   29.40    0.78
   2 -10  -3   37.87    1.01
  -2 -10   3   38.67    0.90
  -2 -10   3   38.01    1.03
   2 -10  -3   37.52    0.93
   2  10  -3   37.37    0.97
  -2  10   3   37.30    0.96
  -2  10   3   36.45    1.07
  -1 -10   3   17.01    0.43
  -1 -10   3   16.46    0.51
   1 -10  -3   17.10    0.50
   1 -10  -3   17.77    0.46
  -1  10   3   18.08    0.46
   1  10  -3   17.53    0.48
  -1  10   3   17.09    0.52
   1  10  -3   16.30    0.49
   0 -10  -3    2.08    0.17
   0 -10   3    2.22    0.13
   0 -10  -3    2.02    0.13
   0 -10   3    2.25    0.16
   0  10  -3    2.33    0.17
   0  10   3    2.24    0.16
   0  10   3    2.21    0.13
   0  10  -3    2.34    0.15
   1 -10   3   14.78    0.44
  -1 -10  -3   14.37    0.46
   1 -10   3   15.04    0.40
  -1 -10  -3   14.49    0.37
  -1  10  -3   16.14    0.43
   1  10   3   14.55    0.42
   1  10   3   14.55    0.44
  -1  10  -3   14.53    0.48
   2 -10   3    6.01    0.22
   2 -10   3    5.87    0.22
  -2 -10  -3    6.25    0.17
  -2 -10  -3    6.05    0.25
   2  10   3    6.34    0.22
   2  10   3    5.83    0.24
  -2  10  -3    6.53    0.25
  -2  10  -3    6.16    0.30
   3 -10   3    7.46    0.26
  -3 -10  -3    7.71    0.30
   3 -10   3    7.25    0.24
   3  10   3    7.36    0.25
  -3  10  -3    6.40    0.33
   3  10   3    6.95    0.28
  -3  10  -3    7.46    0.29
  -4 -10  -3    0.54    0.14
   4 -10   3    0.65    0.11
  -4  10  -3    0.62    0.15
   4  10   3    0.75    0.10
  -4  10  -3    0.83    0.18
  -5 -10  -3    4.01    0.29
  -5 -10  -3    3.97    0.25
   5 -10   3    3.97    0.22
  -5  10  -3    3.95    0.34
  -5  10  -3    3.73    0.30
   5  10   3    4.14    0.22
  -6 -10  -3    9.47    0.39
   6 -10   3    8.86    0.34
  -6 -10  -3    9.13    0.43
   6  10   3    9.17    0.35
  -6  10  -3    8.76    0.48
  -6  10  -3    8.90    0.42
  -7 -10  -3    0.47    0.21
   7 -10   3    0.10    0.13
  -7 -10  -3    0.29    0.17
   7  10   3    0.33    0.14
  -7  10  -3    0.27    0.22
  -7  10  -3    0.12    0.24
  -8 -10  -3    1.41    0.26
   8 -10   3    1.46    0.18
  -8 -10  -3    1.25    0.22
   8  10   3    1.44    0.18
  -8  10  -3    1.28    0.31
   9 -10   3    0.03    0.15
  -9 -10  -3    0.13    0.23
  -9 -10  -3    0.39    0.20
  -9  10  -3   -0.06    0.29
  10 -10   3    5.07    0.31
 -10  10  -3    3.96    0.47
  11 -10   3    0.32    0.19
 -11 -11   3    0.18    0.25
 -10 -11   3    3.51    0.33
  10 -11  -3    3.91    0.31
 -10  11   3    3.72    0.44
  10  11  -3    3.92    0.31
  -9 -11   3    0.36    0.21
   9 -11  -3    0.55    0.18
   9  11  -3    0.52    0.19
  -9  11   3    0.35    0.30
  -8 -11   3    3.84    0.31
   8 -11  -3    3.76    0.27
   8  11  -3    3.54    0.27
  -8  11   3    3.40    0.37
   7 -11  -3    0.26    0.15
  -7 -11   3    0.20    0.18
   7  11  -3    0.23    0.15
  -7  11   3    0.65    0.25
  -6 -11   3    0.73    0.19
   6 -11  -3    0.91    0.16
   6  11  -3    0.65    0.15
  -6  11   3    0.84    0.23
   5 -11  -3   31.29    0.84
   5 -11  -3   32.09    0.88
  -5 -11   3   30.89    0.92
   5  11  -3   32.28    0.87
   5  11  -3   32.28    0.87
  -5  11   3   30.35    0.99
  -4 -11   3    0.59    0.15
   4 -11  -3    0.77    0.14
   4 -11  -3    0.52    0.12
  -4 -11   3    0.64    0.08
  -4  11   3    0.76    0.13
   4  11  -3    0.84    0.13
   4  11  -3    0.71    0.08
  -4  11   3    0.54    0.18
  -3 -11   3    7.03    0.30
  -3 -11   3    7.45    0.23
   3 -11  -3    7.03    0.28
   3 -11  -3    7.74    0.28
   3  11  -3    7.74    0.27
   3  11  -3    7.46    0.24
  -3  11   3    6.83    0.34
  -3  11   3    7.62    0.26
  -2 -11   3    0.10    0.11
   2 -11  -3    0.13    0.09
  -2 -11   3    0.27    0.06
   2 -11  -3    0.22    0.10
  -2  11   3    0.33    0.13
  -2  11   3    0.31    0.09
   2  11  -3    0.26    0.09
   2  11  -3    0.34    0.07
  -1 -11   3    5.85    0.19
   1 -11  -3    6.39    0.25
  -1 -11   3    6.05    0.26
   1 -11  -3    6.45    0.22
   1  11  -3    5.68    0.22
  -1  11   3    6.49    0.27
   1  11  -3    6.22    0.23
  -1  11   3    5.92    0.21
   0 -11  -3    0.69    0.12
   0 -11   3    0.41    0.07
   0 -11  -3    0.68    0.08
   0 -11   3    0.52    0.11
   0  11   3    0.63    0.08
   0  11  -3    0.50    0.10
   0  11  -3    0.69    0.10
   0  11   3    0.64    0.10
  -1 -11  -3    4.02    0.14
  -1 -11  -3    4.21    0.22
   1 -11   3    3.73    0.19
   1 -11   3    3.63    0.16
   1  11   3    4.09    0.18
  -1  11  -3    3.65    0.19
  -1  11  -3    3.33    0.22
   1  11   3    4.01    0.18
  -2 -11  -3    0.17    0.12
   2 -11   3    0.20    0.08
  -2 -11  -3    0.11    0.04
   2 -11   3    0.13    0.08
   2  11   3    0.21    0.08
   2  11   3    0.16    0.09
  -2  11  -3    0.19    0.13
  -2  11  -3    0.33    0.11
   3 -11   3    7.99    0.28
  -3 -11  -3    7.82    0.31
   3 -11   3    7.91    0.26
   3  11   3    8.09    0.27
  -3  11  -3    7.99    0.37
   3  11   3    8.00    0.30
  -3  11  -3    7.54    0.31
   4 -11   3    1.68    0.15
  -4 -11  -3    1.89    0.18
   4  11   3    1.98    0.15
  -4  11  -3    1.60    0.19
  -4  11  -3    1.76    0.22
   4  11   3    1.81    0.17
   5 -11   3    6.10    0.27
  -5 -11  -3    6.97    0.32
  -5  11  -3    6.61    0.35
  -5  11  -3    6.40    0.40
   5  11   3    7.01    0.27
   6 -11   3   -0.06    0.12
  -6 -11  -3    0.21    0.16
   6  11   3   -0.07    0.12
  -6  11  -3    0.16    0.20
  -6  11  -3   -0.08    0.22
  -7 -11  -3    0.18    0.18
   7 -11   3    0.46    0.14
   7  11   3    0.50    0.14
  -7  11  -3    0.23    0.26
   8 -11   3    2.56    0.22
  -8 -11  -3    2.51    0.26
   8  11   3    2.61    0.23
  -8  11  -3    2.21    0.35
  -9 -11  -3    0.11    0.20
   9 -11   3    0.05    0.16
  -9  11  -3    0.18    0.30
 -10 -11  -3    3.40    0.33
  10 -11   3    3.67    0.29
 -10  11  -3    3.94    0.47
 -10 -12   3    0.05    0.22
  10 -12  -3   -0.04    0.19
  10  12  -3   -0.23    0.18
 -10  12   3    0.24    0.34
   9 -12  -3    2.08    0.24
  -9 -12   3    1.99    0.28
  -9  12   3    2.27    0.37
   9  12  -3    2.04    0.23
   8 -12  -3    8.50    0.38
  -8 -12   3    8.45    0.42
   8  12  -3    8.43    0.38
  -8  12   3    8.02    0.52
   7 -12  -3    0.10    0.15
  -7 -12   3   -0.06    0.18
  -7  12   3    0.09    0.24
   7  12  -3    0.11    0.14
   6 -12  -3    0.80    0.16
  -6 -12   3    0.69    0.19
  -6  12   3    0.98    0.25
   6  12  -3    0.61    0.15
  -5 -12   3    4.13    0.28
   5 -12  -3    4.24    0.24
   5  12  -3    4.60    0.25
  -5  12   3    3.95    0.32
  -4 -12   3    1.24    0.17
   4 -12  -3    1.09    0.14
   4 -12  -3    1.34    0.15
   4  12  -3    1.19    0.10
  -4  12   3    0.79    0.19
   4  12  -3    1.12    0.14
  -3 -12   3    2.95    0.14
   3 -12  -3    2.80    0.20
   3 -12  -3    3.18    0.20
  -3 -12   3    3.31    0.23
  -3  12   3    2.76    0.18
  -3  12   3    3.00    0.26
   3  12  -3    3.00    0.15
   3  12  -3    3.18    0.19
   2 -12  -3    1.08    0.13
  -2 -12   3    1.11    0.08
   2 -12  -3    1.12    0.12
  -2 -12   3    1.32    0.16
  -2  12   3    1.00    0.11
   2  12  -3    1.21    0.10
  -2  12   3    1.11    0.16
   2  12  -3    1.12    0.11
  -1 -12   3   13.00    0.34
  -1 -12   3   12.54    0.42
   1 -12  -3   12.58    0.36
   1 -12  -3   12.28    0.41
   1  12  -3   12.42    0.38
   1  12  -3   12.86    0.39
  -1  12   3   12.40    0.36
  -1  12   3   12.45    0.42
   0 -12  -3   27.23    0.66
   0 -12   3   26.80    0.75
   0 -12  -3   25.79    0.75
   0 -12   3   25.94    0.66
   0  12   3   26.45    0.76
   0  12   3   26.56    0.69
   0  12  -3   26.84    0.77
   0  12  -3   26.87    0.71
   1 -12   3    1.06    0.10
   1 -12   3    1.13    0.12
  -1 -12  -3    1.22    0.10
  -1 -12  -3    1.10    0.14
  -1  12  -3    1.13    0.14
   1  12   3    1.33    0.11
   1  12   3    1.21    0.11
  -1  12  -3    1.19    0.12
   2 -12   3    4.20    0.20
  -2 -12  -3    4.06    0.13
   2 -12   3    4.02    0.19
  -2 -12  -3    4.18    0.23
  -2  12  -3    3.75    0.26
  -2  12  -3    4.61    0.22
   2  12   3    4.07    0.20
   2  12   3    4.17    0.18
  -3 -12  -3    7.87    0.33
   3 -12   3    7.33    0.26
   3 -12   3    7.55    0.28
  -3  12  -3    8.17    0.38
  -3  12  -3    7.55    0.32
   3  12   3    8.09    0.30
   3  12   3    7.88    0.27
   4 -12   3    1.04    0.13
  -4 -12  -3    0.96    0.17
  -4  12  -3    0.76    0.17
  -4  12  -3    0.87    0.20
   4  12   3    1.13    0.15
   4  12   3    0.96    0.11
  -5 -12  -3    0.16    0.16
   5 -12   3    0.17    0.12
   5  12   3    0.18    0.10
  -5  12  -3    0.03    0.18
   5  12   3    0.06    0.14
  -5  12  -3    0.19    0.21
  -6 -12  -3   23.01    0.74
   6 -12   3   23.05    0.66
   6  12   3   24.42    0.70
  -6  12  -3   23.40    0.74
   6  12   3   23.48    0.71
  -6  12  -3   22.67    0.84
  -7 -12  -3    2.54    0.25
   7 -12   3    2.22    0.20
   7  12   3    2.35    0.19
   7  12   3    2.30    0.23
  -7  12  -3    2.53    0.34
   8 -12   3    8.07    0.35
  -8 -12  -3    8.22    0.40
   8  12   3    7.29    0.38
  -8  12  -3    8.27    0.53
   9 -12   3    0.39    0.17
  -9 -12  -3    0.50    0.22
   9  12   3    0.51    0.20
  -9  12  -3    0.12    0.31
  10 -12   3    1.70    0.23
 -10 -12  -3    1.81    0.28
 -10  12  -3    1.78    0.40
  10  12   3    1.71    0.26
  10 -13  -3    0.01    0.19
 -10 -13   3    0.06    0.22
  10  13  -3   -0.10    0.19
 -10  13   3    0.01    0.34
   9 -13  -3    0.41    0.19
  -9 -13   3    0.06    0.21
  -9  13   3    0.27    0.31
   9  13  -3    0.19    0.17
   8 -13  -3    4.85    0.30
  -8 -13   3    4.30    0.33
  -8  13   3    4.54    0.42
   8  13  -3    4.53    0.29
   7 -13  -3    0.08    0.15
  -7 -13   3   -0.03    0.18
   7  13  -3    0.23    0.15
  -7  13   3    0.17    0.25
  -6 -13   3    0.05    0.15
   6 -13  -3    0.24    0.14
  -6  13   3    0.35    0.23
   6  13  -3    0.14    0.14
   5 -13  -3   20.20    0.60
  -5 -13   3   20.73    0.67
  -5  13   3   19.79    0.73
   5  13  -3   21.24    0.62
   4 -13  -3    0.30    0.12
   4 -13  -3    0.20    0.13
  -4 -13   3    0.06    0.15
   4  13  -3    0.18    0.11
  -4  13   3    0.17    0.18
  -3 -13   3    1.80    0.19
   3 -13  -3    1.79    0.16
   3 -13  -3    1.38    0.14
  -3 -13   3    1.57    0.13
  -3  13   3    1.42    0.14
   3  13  -3    1.45    0.14
  -3  13   3    1.48    0.20
   3  13  -3    1.79    0.13
   2 -13  -3    0.21    0.10
  -2 -13   3    0.24    0.07
   2 -13  -3    0.34    0.12
  -2 -13   3    0.19    0.13
   2  13  -3    0.09    0.09
  -2  13   3    0.40    0.10
   2  13  -3    0.21    0.08
  -2  13   3    0.23    0.14
   1 -13  -3    9.54    0.33
  -1 -13   3    8.92    0.26
  -1 -13   3    9.18    0.34
   1 -13  -3    8.91    0.29
   1  13  -3    8.45    0.30
  -1  13   3    9.60    0.29
  -1  13   3    8.94    0.34
   1  13  -3    9.13    0.32
   0 -13   3    0.27    0.11
   0 -13  -3    0.08    0.07
   0 -13   3    0.11    0.07
   0 -13  -3    0.13    0.12
   0  13  -3    0.03    0.09
   0  13   3    0.09    0.10
   0  13   3    0.19    0.08
   0  13  -3    0.20    0.11
   1 -13   3    1.71    0.14
  -1 -13  -3    1.78    0.11
   1 -13   3    1.83    0.16
  -1 -13  -3    1.93    0.17
  -1  13  -3    1.69    0.17
  -1  13  -3    1.85    0.14
   1  13   3    2.02    0.16
   1  13   3    1.92    0.15
  -2 -13  -3    0.24    0.13
   2 -13   3    0.28    0.11
   2 -13   3    0.19    0.09
  -2  13  -3    0.20    0.15
   2  13   3    0.20    0.10
   2  13   3    0.13    0.09
  -2  13  -3    0.22    0.12
  -3 -13  -3    5.39    0.29
   3 -13   3    5.72    0.24
   3 -13   3    5.65    0.23
  -3  13  -3    5.30    0.33
   3  13   3    5.10    0.25
   3  13   3    5.61    0.22
  -3  13  -3    5.19    0.28
   4 -13   3    5.86    0.26
  -4 -13  -3    6.50    0.32
   4  13   3    6.42    0.24
   4  13   3    6.31    0.29
  -4  13  -3    5.60    0.32
  -4  13  -3    5.42    0.35
   5 -13   3    2.68    0.21
  -5 -13  -3    2.38    0.23
   5  13   3    2.67    0.23
   5  13   3    2.46    0.18
  -5  13  -3    2.66    0.24
  -5  13  -3    2.78    0.30
  -6 -13  -3    0.89    0.20
   6 -13   3    1.04    0.16
  -6  13  -3    0.69    0.26
   6  13   3    0.88    0.18
   6  13   3    0.85    0.14
   7 -13   3    1.36    0.18
  -7 -13  -3    1.53    0.23
  -7  13  -3    1.59    0.31
   7  13   3    1.60    0.17
   7  13   3    1.68    0.21
   8 -13   3    0.16    0.15
  -8 -13  -3    0.04    0.20
   8  13   3    0.17    0.19
  -8  13  -3    0.12    0.29
  -9 -13  -3    6.27    0.38
   9 -13   3    6.27    0.33
  -9  13  -3    5.96    0.52
   9  13   3    6.43    0.38
 -10 -13  -3    0.04    0.22
  10 -13   3    0.36    0.19
  10  13   3    0.00    0.21
 -10 -14   3    0.45    0.24
   9 -14  -3    0.11    0.19
  -9 -14   3    0.03    0.22
  -9  14   3   -0.06    0.31
   9  14  -3   -0.15    0.17
  -8 -14   3    0.20    0.21
   8 -14  -3    0.22    0.17
   8  14  -3    0.14    0.17
  -8  14   3    0.06    0.28
   7 -14  -3    0.07    0.15
  -7 -14   3   -0.02    0.19
  -7  14   3    0.36    0.26
   7  14  -3    0.12    0.15
   6 -14  -3    1.37    0.18
  -6 -14   3    1.99    0.24
  -6  14   3    2.03    0.30
   6  14  -3    1.60    0.19
  -5 -14   3    2.01    0.23
   5 -14  -3    1.31    0.17
  -5  14   3    1.47    0.25
   5  14  -3    1.33    0.16
  -4 -14   3    0.25    0.16
   4 -14  -3    0.10    0.12
   4 -14  -3    0.21    0.14
  -4  14   3    0.11    0.19
   4  14  -3    0.17    0.12
   3 -14  -3    0.01    0.12
   3 -14  -3   -0.12    0.11
  -3 -14   3   -0.06    0.14
  -3 -14   3    0.07    0.07
  -3  14   3    0.12    0.17
   3  14  -3    0.09    0.09
   3  14  -3    0.15    0.11
  -2 -14   3    7.30    0.23
   2 -14  -3    7.36    0.27
  -2 -14   3    7.08    0.32
   2 -14  -3    7.36    0.30
   2  14  -3    7.01    0.27
   2  14  -3    7.24    0.27
  -2  14   3    7.07    0.27
  -2  14   3    7.07    0.34
  -1 -14   3   10.19    0.38
   1 -14  -3   10.66    0.32
   1 -14  -3   10.29    0.37
  -1 -14   3   10.26    0.30
  -1  14   3   10.62    0.33
   1  14  -3   10.99    0.36
   1  14  -3   10.58    0.34
  -1  14   3    9.61    0.38
   0 -14  -3   10.88    0.31
   0 -14   3   11.03    0.31
   0 -14  -3   10.40    0.38
   0 -14   3   10.83    0.38
   0  14   3   10.25    0.37
   0  14  -3   10.73    0.35
   0  14  -3   10.38    0.38
   0  14   3   10.53    0.33
   1 -14   3    0.54    0.13
   1 -14   3    0.53    0.10
  -1 -14  -3    0.51    0.14
  -1 -14  -3    0.57    0.07
  -1  14  -3    0.40    0.14
  -1  14  -3    0.64    0.12
   1  14   3    0.55    0.11
   1  14   3    0.44    0.10
  -2 -14  -3    1.29    0.16
   2 -14   3    1.33    0.14
   2 -14   3    1.53    0.13
  -2  14  -3    1.55    0.16
   2  14   3    1.47    0.13
   2  14   3    1.32    0.13
  -2  14  -3    1.40    0.19
   3 -14   3    2.75    0.19
  -3 -14  -3    3.13    0.24
   3  14   3    2.66    0.20
  -3  14  -3    2.47    0.24
   3  14   3    2.62    0.17
  -3  14  -3    2.52    0.21
  -4 -14  -3    3.17    0.26
   4 -14   3    3.12    0.21
   4  14   3    3.12    0.23
  -4  14  -3    2.90    0.24
   4  14   3    3.04    0.19
  -4  14  -3    2.84    0.28
  -5 -14  -3    9.78    0.41
   5 -14   3   10.10    0.37
   5  14   3   11.01    0.40
   5  14   3   10.96    0.36
  -5  14  -3    9.80    0.43
  -5  14  -3    9.86    0.50
   6 -14   3    0.67    0.15
  -6 -14  -3    0.67    0.20
  -6  14  -3    0.76    0.27
   6  14   3    0.50    0.13
   6  14   3    0.77    0.18
   7 -14   3    0.01    0.14
  -7 -14  -3    0.40    0.20
  -7  14  -3   -0.15    0.26
   7  14   3    0.05    0.17
  -8 -14  -3    8.70    0.43
   8 -14   3    8.41    0.36
  -8  14  -3    8.07    0.55
   8  14   3    8.09    0.40
   9 -14   3   -0.02    0.17
  -9 -14  -3    0.08    0.22
   9  14   3    0.02    0.19
  -9  14  -3   -0.25    0.31
 -10 -14  -3    0.41    0.24
  -9 -15   3   -0.17    0.22
   9 -15  -3   -0.03    0.19
  -9  15   3    0.02    0.32
   9  15  -3    0.19    0.19
   8 -15  -3    0.67    0.19
  -8 -15   3    0.35    0.22
   8  15  -3    0.38    0.18
  -8  15   3    0.89    0.32
   7 -15  -3    3.62    0.27
  -7 -15   3    3.92    0.32
  -7  15   3    3.66    0.38
   7  15  -3    3.85    0.27
   6 -15  -3   -0.02    0.14
  -6 -15   3   -0.12    0.16
   6  15  -3    0.02    0.14
  -6  15   3   -0.13    0.24
   5 -15  -3    6.80    0.31
  -5 -15   3    6.90    0.36
  -5  15   3    6.84    0.42
   5  15  -3    6.64    0.31
  -4 -15   3   10.57    0.43
   4 -15  -3   10.42    0.37
   4 -15  -3   10.94    0.38
  -4  15   3    9.72    0.47
   4  15  -3   10.08    0.37
   3 -15  -3    6.94    0.28
   3 -15  -3    6.94    0.29
  -3 -15   3    6.37    0.31
  -3  15   3    6.65    0.36
   3  15  -3    6.11    0.27
   2 -15  -3    2.89    0.22
   2 -15  -3    2.87    0.19
  -2 -15   3    2.82    0.23
  -2 -15   3    2.65    0.14
  -2  15   3    2.85    0.26
  -2  15   3    2.53    0.19
   2  15  -3    2.94    0.19
   2  15  -3    2.83    0.19
   1 -15  -3   10.44    0.32
  -1 -15   3    9.81    0.29
   1 -15  -3   10.33    0.38
  -1 -15   3    9.87    0.38
   1  15  -3    9.71    0.35
  -1  15   3   10.08    0.38
  -1  15   3   10.00    0.32
   1  15  -3    9.61    0.33
   0 -15  -3    1.94    0.19
   0 -15  -3    2.26    0.14
   0 -15   3    2.23    0.19
   0 -15   3    2.32    0.14
   0  15   3    1.87    0.15
   0  15  -3    2.11    0.18
   0  15   3    1.83    0.17
   0  15  -3    2.16    0.18
  -1 -15  -3    0.30    0.15
   1 -15   3    0.22    0.09
  -1 -15  -3    0.25    0.07
   1 -15   3    0.32    0.13
   1  15   3    0.24    0.12
  -1  15  -3    0.45    0.15
  -1  15  -3    0.26    0.12
   1  15   3    0.28    0.10
   2 -15   3    9.58    0.35
   2 -15   3    9.77    0.32
  -2 -15  -3   10.18    0.39
  -2  15  -3    9.68    0.41
  -2  15  -3    9.08    0.36
   2  15   3    9.75    0.34
   2  15   3    9.84    0.34
  -3 -15  -3    0.09    0.15
   3 -15   3    0.01    0.11
   3  15   3   -0.05    0.12
  -3  15  -3   -0.15    0.15
  -3  15  -3    0.10    0.18
   3  15   3    0.05    0.10
  -4 -15  -3    3.27    0.27
   4 -15   3    2.51    0.19
   4  15   3    3.06    0.23
   4  15   3    3.07    0.20
  -4  15  -3    2.91    0.24
  -4  15  -3    3.25    0.30
   5 -15   3    0.01    0.13
  -5 -15  -3    0.19    0.18
   5  15   3    0.20    0.12
  -5  15  -3    0.06    0.23
   5  15   3    0.22    0.15
  -6 -15  -3    0.22    0.20
   6 -15   3    0.25    0.15
   6  15   3    0.28    0.17
  -6  15  -3    0.33    0.26
   6  15   3    0.23    0.12
   7 -15   3    4.80    0.28
  -7 -15  -3    5.43    0.35
   7  15   3    4.86    0.31
  -7  15  -3    4.71    0.43
  -8 -15  -3    3.04    0.31
   8 -15   3    2.81    0.24
  -8  15  -3    2.94    0.39
   8  15   3    2.78    0.26
  -9 -15  -3    0.13    0.23
   9 -15   3    0.32    0.18
  -9  15  -3    0.20    0.34
   9  15   3    0.18    0.20
 -10 -15  -3    0.08    0.24
   9 -16  -3   -0.03    0.19
  -9 -16   3    0.10    0.24
  -9  16   3    0.18    0.33
   9  16  -3    0.17    0.19
   8 -16  -3    0.20    0.17
  -8 -16   3   -0.14    0.21
   8  16  -3   -0.05    0.17
  -8  16   3   -0.18    0.30
  -7 -16   3    0.01    0.21
   7 -16  -3    0.07    0.16
   7  16  -3    0.01    0.16
  -7  16   3    0.29    0.28
  -6 -16   3    0.18    0.19
   6 -16  -3    0.20    0.15
  -6  16   3    0.49    0.26
   6  16  -3   -0.13    0.14
  -5 -16   3    0.22    0.19
   5 -16  -3    0.41    0.15
   5  16  -3    0.59    0.15
  -5  16   3    0.47    0.24
  -4 -16   3    0.04    0.17
   4 -16  -3   -0.05    0.13
  -4  16   3    0.21    0.21
   4  16  -3   -0.02    0.12
   3 -16  -3   36.16    1.01
   3 -16  -3   36.16    0.93
  -3 -16   3   35.68    1.05
  -3  16   3   37.09    1.10
   3  16  -3   35.09    0.97
  -2 -16   3    1.79    0.21
   2 -16  -3    1.89    0.19
   2 -16  -3    1.69    0.15
  -2 -16   3    1.92    0.13
   2  16  -3    2.10    0.17
  -2  16   3    1.95    0.22
   2  16  -3    2.15    0.19
  -1 -16   3    5.85    0.21
  -1 -16   3    5.78    0.30
   1 -16  -3    6.62    0.30
   1 -16  -3    6.10    0.24
   1  16  -3    6.27    0.27
   1  16  -3    5.30    0.24
  -1  16   3    5.29    0.29
  -1  16   3    5.61    0.24
   0 -16  -3    1.14    0.11
   0 -16   3    1.32    0.12
   0 -16  -3    1.11    0.17
   0 -16   3    1.34    0.18
   0  16  -3    1.41    0.17
   0  16  -3    1.23    0.15
   0  16   3    0.95    0.12
   0  16   3    1.29    0.16
   1 -16   3   18.23    0.56
   1 -16   3   18.06    0.49
  -1 -16  -3   17.58    0.58
   1  16   3   17.36    0.56
  -1  16  -3   17.73    0.60
   1  16   3   17.53    0.51
  -1  16  -3   18.63    0.54
   2 -16   3   17.83    0.50
   2 -16   3   17.10    0.54
  -2 -16  -3   17.51    0.58
  -2  16  -3   17.40    0.61
   2  16   3   17.56    0.52
   2  16   3   17.62    0.54
  -2  16  -3   16.97    0.54
  -3 -16  -3    4.48    0.29
   3 -16   3    4.48    0.22
   3  16   3    4.08    0.23
  -3  16  -3    4.64    0.34
   3  16   3    4.42    0.24
  -3  16  -3    4.60    0.29
   4 -16   3    6.40    0.28
  -4 -16  -3    6.20    0.34
   4  16   3    6.40    0.26
  -4  16  -3    5.57    0.34
  -4  16  -3    6.46    0.41
   4  16   3    6.50    0.30
   5 -16   3    1.94    0.18
  -5 -16  -3    2.20    0.25
   5  16   3    1.93    0.20
  -5  16  -3    1.80    0.29
   5  16   3    2.29    0.19
  -6 -16  -3    1.21    0.23
   6 -16   3    0.92    0.17
  -6  16  -3    1.24    0.30
   6  16   3    1.10    0.19
  -7 -16  -3    1.07    0.24
   7 -16   3    1.23    0.18
   7  16   3    1.03    0.20
  -7  16  -3    1.36    0.32
   8 -16   3    2.38    0.23
  -8 -16  -3    3.05    0.31
  -8  16  -3    2.47    0.39
   8  16   3    3.18    0.27
   9 -16   3    0.36    0.19
  -9 -16  -3    0.36    0.24
   9  16   3    0.04    0.20
  -9  16  -3    0.51    0.35
   8 -17  -3    1.70    0.23
  -8 -17   3    1.80    0.28
   8  17  -3    1.53    0.22
  -8  17   3    1.56    0.37
  -7 -17   3    3.64    0.32
   7 -17  -3    3.18    0.27
   7  17  -3    3.33    0.26
  -7  17   3    2.90    0.37
  -6 -17   3    1.05    0.23
   6 -17  -3    0.74    0.17
  -6  17   3    0.64    0.27
   6  17  -3    0.85    0.17
   5 -17  -3    0.73    0.16
  -5 -17   3    0.69    0.21
   5  17  -3    0.74    0.16
  -5  17   3    0.78    0.25
  -4 -17   3    0.07    0.18
   4 -17  -3    0.25    0.14
  -4  17   3    0.07    0.21
   4  17  -3    0.07    0.13
  -3 -17   3    4.18    0.29
   3 -17  -3    3.74    0.25
   3 -17  -3    3.62    0.23
   3  17  -3    3.63    0.22
  -3  17   3    3.71    0.31
   2 -17  -3    0.01    0.14
   2 -17  -3   -0.14    0.11
  -2 -17   3    0.07    0.16
  -2  17   3    0.07    0.17
   2  17  -3   -0.05    0.11
  -1 -17   3   24.63    0.76
   1 -17  -3   25.71    0.66
  -1 -17   3   24.67    0.64
   1 -17  -3   26.34    0.76
   1  17  -3   24.45    0.75
   1  17  -3   24.22    0.69
  -1  17   3   24.50    0.68
  -1  17   3   24.87    0.78
   0 -17  -3    0.17    0.09
   0 -17   3    0.01    0.09
   0 -17   3   -0.32    0.13
   0 -17  -3   -0.06    0.15
   0  17   3    0.03    0.10
   0  17  -3    0.09    0.15
   0  17   3   -0.04    0.14
   0  17  -3   -0.16    0.12
  -1 -17  -3   28.37    0.83
   1 -17   3   27.13    0.71
   1 -17   3   27.43    0.80
   1  17   3   27.45    0.75
   1  17   3   28.10    0.81
  -1  17  -3   26.82    0.85
  -1  17  -3   26.66    0.76
   2 -17   3    3.93    0.24
  -2 -17  -3    3.77    0.28
   2 -17   3    3.82    0.21
  -2  17  -3    3.69    0.30
   2  17   3    4.14    0.23
   2  17   3    4.01    0.22
  -2  17  -3    3.63    0.27
   3 -17   3    2.56    0.19
  -3 -17  -3    2.51    0.23
  -3  17  -3    2.42    0.27
   3  17   3    2.44    0.19
   3  17   3    2.26    0.19
  -3  17  -3    2.58    0.23
  -4 -17  -3    7.17    0.37
   4 -17   3    7.47    0.30
   4  17   3    8.01    0.30
  -4  17  -3    7.62    0.44
   4  17   3    7.45    0.32
  -5 -17  -3    5.29    0.34
   5 -17   3    5.17    0.27
  -5  17  -3    5.60    0.42
   5  17   3    5.42    0.30
   6 -17   3    0.06    0.14
  -6 -17  -3    0.16    0.21
  -6  17  -3   -0.05    0.26
   6  17   3    0.03    0.16
  -7 -17  -3    0.24    0.22
   7 -17   3    0.72    0.17
   7  17   3    0.42    0.19
  -7  17  -3    0.59    0.31
   8 -17   3    0.73    0.19
  -8 -17  -3    0.83    0.25
  -8  17  -3    0.44    0.34
   8  17   3    0.51    0.21
  -9 -17  -3    0.06    0.24
   8 -18  -3    8.10    0.40
  -8 -18   3    8.13    0.46
   8  18  -3    8.65    0.40
  -8  18   3    9.05    0.59
  -7 -18   3   -0.02    0.22
   7 -18  -3    0.33    0.18
  -7  18   3    0.23    0.29
   7  18  -3    0.12    0.16
   6 -18  -3    3.19    0.25
  -6 -18   3    2.53    0.29
  -6  18   3    3.07    0.36
   6  18  -3    2.68    0.23
  -5 -18   3    1.68    0.25
   5 -18  -3    1.49    0.19
  -5  18   3    1.80    0.29
   5  18  -3    1.44    0.18
   4 -18  -3    1.23    0.17
  -4 -18   3    1.01    0.22
   4  18  -3    1.10    0.16
  -4  18   3    1.38    0.26
   3 -18  -3    0.59    0.14
   3 -18  -3    0.73    0.17
  -3 -18   3    0.84    0.20
  -3  18   3    0.43    0.21
   3  18  -3    0.72    0.14
   2 -18  -3    4.59    0.23
  -2 -18   3    4.71    0.30
   2 -18  -3    5.09    0.27
  -2  18   3    4.89    0.33
   2  18  -3    4.70    0.24
  -1 -18   3    6.30    0.23
   1 -18  -3    6.57    0.25
   1 -18  -3    6.52    0.32
  -1 -18   3    6.25    0.32
  -1  18   3    6.19    0.34
   1  18  -3    6.41    0.27
   0 -18  -3    2.84    0.24
   0 -18   3    2.87    0.26
   0 -18   3    2.84    0.17
   0  18  -3    2.78    0.26
   0  18   3    2.63    0.19
   0  18   3    2.77    0.24
   0  18  -3    2.66    0.22
   1 -18   3    2.67    0.24
   1 -18   3    2.95    0.19
  -1 -18  -3    2.90    0.25
   1  18   3    2.86    0.23
   1  18   3    2.64    0.19
  -1  18  -3    2.25    0.20
  -1  18  -3    3.41    0.29
   2 -18   3    1.46    0.15
  -2 -18  -3    1.54    0.22
  -2  18  -3    1.45    0.23
   2  18   3    1.48    0.17
  -2  18  -3    1.24    0.19
   2  18   3    1.13    0.15
  -3 -18  -3    2.07    0.24
   3 -18   3    1.91    0.17
  -3  18  -3    1.73    0.22
   3  18   3    2.06    0.18
  -3  18  -3    2.13    0.27
   3  18   3    1.80    0.18
   4 -18   3    0.11    0.13
  -4 -18  -3    0.31    0.19
  -4  18  -3    0.29    0.23
   4  18   3    0.06    0.14
   4  18   3    0.29    0.13
  -5 -18  -3    1.05    0.23
   5 -18   3    1.07    0.17
   5  18   3    1.06    0.18
  -5  18  -3    1.15    0.28
   6 -18   3    1.91    0.20
  -6 -18  -3    2.15    0.26
   6  18   3    2.25    0.23
  -6  18  -3    1.94    0.33
   7 -18   3    1.22    0.20
  -7 -18  -3    1.61    0.27
  -7  18  -3    1.17    0.34
   7  18   3    1.06    0.21
   8 -18   3    8.33    0.38
  -8 -18  -3    7.87    0.46
   8  18   3    8.40    0.42
  -8  18  -3    8.93    0.59
   8 -19  -3    0.01    0.19
   7 -19  -3    0.69    0.19
  -7 -19   3    0.46    0.24
   7  19  -3    0.62    0.19
  -7  19   3    0.92    0.33
  -6 -19   3    1.42    0.26
   6 -19  -3    1.08    0.19
   6  19  -3    1.05    0.19
  -6  19   3    1.02    0.31
  -5 -19   3    0.83    0.23
   5 -19  -3    0.82    0.17
   5  19  -3    0.86    0.17
  -5  19   3    1.06    0.28
   4 -19  -3    0.61    0.16
  -4 -19   3    0.36    0.21
   4  19  -3    0.57    0.15
  -4  19   3    0.72    0.24
   3 -19  -3    0.16    0.13
  -3 -19   3    0.41    0.20
   3  19  -3    0.16    0.14
  -3  19   3    0.54    0.22
  -2 -19   3    0.26    0.18
   2 -19  -3    0.33    0.17
   2 -19  -3    0.26    0.12
   2  19  -3    0.32    0.13
  -2  19   3    0.48    0.20
   1 -19  -3    0.18    0.17
  -1 -19   3    0.43    0.19
   1 -19  -3    0.42    0.11
  -1  19   3    0.64    0.19
   1  19  -3    0.34    0.14
   0 -19   3    1.83    0.15
   0 -19   3    2.53    0.23
   0 -19  -3    2.28    0.24
   0  19   3    1.84    0.16
   0  19   3    2.10    0.22
   0  19  -3    2.06    0.22
   0  19  -3    2.10    0.19
   1 -19   3    3.26    0.25
   1 -19   3    2.81    0.18
  -1 -19  -3    2.95    0.27
   1  19   3    2.82    0.20
  -1  19  -3    3.11    0.27
  -1  19  -3    2.67    0.22
   1  19   3    3.39    0.26
   2 -19   3    0.05    0.12
  -2 -19  -3   -0.05    0.18
  -2  19  -3    0.00    0.17
  -2  19  -3   -0.01    0.19
   2  19   3    0.11    0.14
   2  19   3    0.00    0.12
  -3 -19  -3    1.86    0.23
   3 -19   3    1.71    0.17
   3  19   3    1.94    0.18
  -3  19  -3    1.51    0.26
   3  19   3    1.77    0.18
  -4 -19  -3    0.30    0.20
   4 -19   3   -0.11    0.13
  -4  19  -3    0.08    0.23
   4  19   3   -0.05    0.14
   5 -19   3    0.05    0.14
  -5 -19  -3    0.20    0.21
  -5  19  -3    0.31    0.26
   5  19   3   -0.13    0.15
  -6 -19  -3    1.12    0.26
   6 -19   3    1.51    0.20
   6  19   3    1.11    0.20
  -6  19  -3    1.81    0.34
   7 -19   3    2.80    0.25
  -7 -19  -3    3.22    0.33
  -7  19  -3    3.48    0.42
   7  19   3    3.03    0.27
  -8 -19  -3    0.12    0.25
  -8  19  -3   -0.12    0.33
   7 -20  -3    0.08    0.18
  -7 -20   3   -0.16    0.23
   7  20  -3    0.00    0.18
  -7  20   3   -0.04    0.31
   6 -20  -3   -0.10    0.16
  -6 -20   3    0.40    0.23
   6  20  -3   -0.05    0.16
  -6  20   3    0.46    0.29
   5 -20  -3    0.18    0.15
  -5 -20   3    0.50    0.23
  -5  20   3    0.08    0.26
   5  20  -3    0.20    0.16
   4 -20  -3    0.82    0.16
  -4 -20   3    1.51    0.25
   4  20  -3    0.81    0.17
  -4  20   3    1.10    0.27
   3 -20  -3   -0.18    0.13
  -3 -20   3    0.03    0.19
  -3  20   3    0.07    0.22
   3  20  -3   -0.13    0.14
   2 -20  -3   -0.13    0.17
   2 -20  -3   -0.10    0.12
  -2 -20   3    0.15    0.18
  -2  20   3    0.10    0.20
   2  20  -3   -0.11    0.13
  -1 -20   3   16.91    0.59
   1 -20  -3   16.77    0.57
  -1  20   3   16.79    0.60
   1  20  -3   16.14    0.52
   0 -20   3    0.99    0.20
   0 -20  -3    0.98    0.20
   0 -20   3    1.04    0.13
   0  20   3    1.19    0.20
   0  20  -3    1.09    0.17
  -1 -20  -3    0.03    0.18
   1 -20   3    0.08    0.17
   1 -20   3   -0.03    0.11
  -1  20  -3   -0.10    0.18
  -1  20  -3   -0.09    0.16
   1  20   3    0.26    0.16
   1  20   3   -0.08    0.12
   2 -20   3    0.03    0.12
  -2 -20  -3    0.34    0.20
   2  20   3    0.36    0.16
   2  20   3    0.25    0.13
  -2  20  -3    0.22    0.17
  -2  20  -3    0.19    0.20
   3 -20   3    0.84    0.15
  -3 -20  -3    0.91    0.22
   3  20   3    0.94    0.16
  -3  20  -3    0.86    0.24
   4 -20   3    0.74    0.16
  -4 -20  -3    0.77    0.23
  -4  20  -3    0.98    0.27
   4  20   3    0.87    0.17
   5 -20   3    1.40    0.19
  -5 -20  -3    1.55    0.26
   5  20   3    1.25    0.20
  -5  20  -3    1.11    0.30
   6 -20   3   -0.07    0.16
  -6 -20  -3    0.57    0.25
  -6  20  -3   -0.11    0.29
   6  20   3   -0.15    0.17
  -7 -20  -3    0.46    0.25
   7 -20   3    0.34    0.18
   7  20   3    0.51    0.20
  -7  20  -3    0.02    0.32
   7 -21  -3    0.38    0.19
  -7  21   3    0.53    0.34
   6 -21  -3   -0.15    0.16
  -6 -21   3   -0.08    0.22
   6  21  -3   -0.25    0.16
  -6  21   3    0.13    0.30
   5 -21  -3    0.90    0.18
  -5 -21   3    0.97    0.25
   5  21  -3    0.52    0.18
  -5  21   3    1.24    0.30
  -4 -21   3    4.86    0.34
   4 -21  -3    4.44    0.27
   4  21  -3    4.73    0.28
  -4  21   3    4.19    0.39
   3 -21  -3    2.20    0.19
  -3 -21   3    2.10    0.27
   3  21  -3    1.91    0.20
  -3  21   3    1.90    0.29
   2 -21  -3    0.59    0.14
   2 -21  -3    0.82    0.20
  -2 -21   3    0.61    0.22
  -2  21   3    0.69    0.23
   2  21  -3    0.62    0.15
  -1 -21   3    0.31    0.20
   1 -21  -3    0.55    0.20
  -1  21   3    0.60    0.21
   1  21  -3    0.29    0.15
   0 -21   3    2.04    0.23
   0 -21  -3    2.33    0.25
   0  21  -3    2.01    0.20
   0  21   3    2.16    0.24
  -1 -21  -3    0.53    0.20
   1 -21   3    0.56    0.13
   1  21   3    0.97    0.19
   1  21   3    0.38    0.14
  -1  21  -3    0.32    0.18
   2 -21   3    1.44    0.16
  -2 -21  -3    1.53    0.24
  -2  21  -3    1.69    0.26
   2  21   3    1.44    0.17
   2  21   3    2.03    0.21
  -3 -21  -3    2.04    0.27
   3 -21   3    1.21    0.17
   3  21   3    1.71    0.18
  -3  21  -3    1.88    0.28
  -4 -21  -3    4.03    0.34
   4 -21   3    3.97    0.25
   4  21   3    3.63    0.26
  -4  21  -3    4.51    0.39
   5 -21   3    0.18    0.15
  -5 -21  -3    0.00    0.22
  -5  21  -3    0.67    0.29
   5  21   3    0.13    0.17
   6 -21   3    0.82    0.19
  -6 -21  -3    1.46    0.26
   6  21   3    1.21    0.21
  -6  21  -3    1.11    0.33
   7  21   3    1.94    0.25
  -7  21  -3    1.81    0.39
  -6 -22   3    0.18    0.25
   6 -22  -3   -0.12    0.17
  -6  22   3    0.22    0.31
   6  22  -3   -0.19    0.17
  -5 -22   3    0.08    0.23
   5 -22  -3   -0.01    0.16
  -5  22   3    0.12    0.27
   5  22  -3    0.26    0.17
  -4 -22   3    0.25    0.22
   4 -22  -3   -0.10    0.15
   4  22  -3   -0.16    0.15
  -4  22   3    0.13    0.25
  -3 -22   3    4.31    0.34
   3 -22  -3    3.76    0.25
  -3  22   3    4.43    0.37
   3  22  -3    3.67    0.26
  -2 -22   3   -0.07    0.20
  -2  22   3    0.00    0.21
   2  22  -3   -0.18    0.14
   1 -22  -3    0.12    0.18
  -1 -22   3   -0.09    0.18
   1  22  -3    0.21    0.16
  -1  22   3    0.26    0.21
   0 -22   3    0.04    0.18
   0 -22  -3    0.03    0.19
   0  22   3    0.12    0.19
   0  22  -3   -0.09    0.15
   1 -22   3    3.43    0.22
  -1 -22  -3    3.96    0.31
  -1  22  -3    3.09    0.26
   1  22   3    3.76    0.30
  -2 -22  -3    0.86    0.23
   2 -22   3    0.51    0.14
  -2  22  -3    0.56    0.23
   2  22   3    0.44    0.15
   3 -22   3    0.15    0.14
  -3 -22  -3    0.48    0.23
  -3  22  -3    0.30    0.25
   3  22   3    0.26    0.16
  -4 -22  -3   -0.15    0.22
   4 -22   3    0.11    0.15
   4  22   3    0.02    0.16
  -4  22  -3    0.16    0.27
  -5 -22  -3   -0.05    0.23
   5 -22   3   -0.13    0.15
  -5  22  -3    0.19    0.29
   5  22   3    0.00    0.17
  -6 -22  -3    0.14    0.24
   6 -22   3   -0.06    0.17
   6  22   3    0.01    0.19
  -6  22  -3    0.19    0.32
   6 -23  -3    1.09    0.21
  -5 -23   3    0.32    0.25
   5 -23  -3    0.17    0.17
  -5  23   3   -0.20    0.28
   5  23  -3    0.05    0.18
  -4 -23   3    1.29    0.26
   4 -23  -3    1.37    0.19
   4  23  -3    1.16    0.20
  -4  23   3    1.83    0.32
   3 -23  -3    0.02    0.14
  -3 -23   3    0.16    0.22
  -3  23   3    0.11    0.25
   3  23  -3    0.19    0.16
  -2 -23   3    0.02    0.20
  -2  23   3   -0.15    0.22
   2  23  -3   -0.11    0.16
   1 -23  -3    2.98    0.28
  -1 -23   3    2.72    0.28
   1  23  -3    2.36    0.23
  -1  23   3    3.27    0.31
   0 -23  -3    4.34    0.32
   0 -23   3    4.20    0.31
   0  23  -3    3.56    0.28
   0  23   3    5.09    0.35
  -1 -23  -3    7.19    0.39
  -2 -23  -3    0.24    0.23
   2 -23   3   -0.02    0.13
   2  23   3   -0.02    0.15
  -3 -23  -3    1.24    0.26
   3 -23   3    0.88    0.16
   3  23   3    1.04    0.18
  -3  23  -3    0.99    0.27
  -4 -23  -3    0.20    0.24
   4 -23   3    0.33    0.16
  -4  23  -3    0.88    0.29
   4  23   3    0.05    0.17
  -5 -23  -3    1.93    0.30
   5 -23   3    1.63    0.21
  -5  23  -3    2.02    0.36
   5  23   3    1.54    0.22
  -6  23  -3   -0.11    0.32
   5 -24  -3    0.43    0.18
   5  24  -3    0.17    0.19
  -5  24   3    0.64    0.32
  -4 -24   3    2.25    0.30
   4 -24  -3    1.90    0.21
   4  24  -3    1.50    0.22
  -4  24   3    1.48    0.32
  -3 -24   3    0.62    0.25
   3  24  -3    0.25    0.18
  -3  24   3    0.46    0.27
  -2 -24   3    0.45    0.23
  -2  24   3    0.57    0.25
   2  24  -3   -0.07    0.17
  -1 -24   3    0.63    0.22
   1 -24  -3    0.60    0.23
  -1  24   3    0.50    0.24
   1  24  -3    0.42    0.19
   0 -24  -3    0.78    0.23
  -1 -24  -3    1.26    0.25
   2 -24   3    2.51    0.21
  -2 -24  -3    2.84    0.31
  -3 -24  -3    0.18    0.24
   3 -24   3    0.15    0.15
   3  24   3    0.01    0.16
   4 -24   3    1.06    0.19
  -4 -24  -3    2.05    0.31
  -4  24  -3    2.08    0.35
   4  24   3    1.50    0.21
   5 -24   3    2.26    0.23
   5  24   3    2.75    0.26
  -5  24  -3    2.73    0.39
   4 -25  -3    0.48    0.17
  -4 -25   3    0.03    0.25
   4  25  -3    0.36    0.19
  -4  25   3    0.11    0.29
  -3 -25   3    0.09    0.24
   3  25  -3    0.41    0.19
  -3  25   3    0.66    0.28
  -2 -25   3    0.72    0.26
   2  25  -3   -0.16    0.18
  -2  25   3    0.77    0.28
  -1 -25   3    1.14    0.25
  -1  25   3    1.44    0.28
   1  25  -3    0.46    0.19
   0 -25  -3    1.18    0.25
  -1 -25  -3    0.93    0.25
  -2 -25  -3    2.06    0.30
   3 -25   3    0.28    0.16
  -3 -25  -3    0.82    0.26
   4 -25   3   -0.10    0.16
   4  25   3   -0.13    0.18
  -5  25  -3    1.52    0.36
  -3 -26   3    0.37    0.26
   3  26  -3    0.27    0.20
  -3  26   3    0.34    0.28
  -2 -26   3    0.55    0.26
  -2  26   3    0.50    0.27
   2  26  -3    0.34    0.20
   0 -26  -3    0.11    0.23
  -1 -26  -3    0.52    0.26
  -2 -26  -3    0.18    0.24
  -2 -27   3    0.02    0.24
  -1 -27  -3    0.08    0.25
 -10   0   4   10.10    0.58
   9   0  -4   -0.17    0.14
  -9   0   4    0.01    0.19
  -9   0   4    0.06    0.24
  -8   0   4    2.14    0.29
  -8   0   4    1.94    0.23
  -7   0   4    0.28    0.13
  -7   0   4   -0.11    0.18
  -7   0   4   -0.01    0.16
  -7   0   4    0.07    0.14
  -6   0   4   19.31    0.60
  -6   0   4   19.68    0.59
  -6   0   4   19.80    0.55
  -6   0   4   19.23    0.67
  -5   0   4   -0.05    0.09
  -5   0   4    0.06    0.12
  -5   0   4    0.00    0.10
  -5   0   4   -0.01    0.13
  -4   0   4   27.54    0.74
  -4   0   4   26.93    0.75
  -4   0   4   27.23    0.70
  -4   0   4   27.42    0.81
  -3   0   4   -0.01    0.10
  -3   0   4    0.01    0.08
  -3   0   4   -0.02    0.08
  -3   0   4    0.09    0.08
   2   0  -4   43.16    1.09
  -2   0   4   44.57    1.19
  -2   0   4   44.84    1.05
  -2   0   4   44.07    1.14
   1   0  -4   -0.02    0.04
  -1   0   4    0.00    0.06
   1   0  -4    0.03    0.08
   0   0   4   22.38    0.64
   0   0   4   21.58    0.56
   0   0  -4   23.47    0.60
   1   0   4    0.02    0.04
   1   0   4    0.10    0.07
  -1   0  -4   -0.16    0.06
  -1   0  -4    0.02    0.10
  -2   0  -4  491.83   12.23
  -2   0  -4  488.88   11.96
   2   0   4  471.16   12.79
   2   0   4  489.21   11.22
   3   0   4   -0.06    0.05
  -3   0  -4    0.10    0.07
  -3   0  -4   -0.06    0.12
  -3   0  -4    0.10    0.12
   4   0   4    1.41    0.10
  -4   0  -4    1.20    0.18
  -4   0  -4    1.47    0.13
  -4   0  -4    1.38    0.18
  -5   0  -4    0.06    0.16
  -5   0  -4    0.12    0.15
  -5   0  -4    0.02    0.08
   5   0   4    0.01    0.07
   6   0   4    0.05    0.08
  -6   0  -4    0.31    0.10
  -6   0  -4    0.29    0.20
  -6   0  -4    0.13    0.17
  -7   0  -4   -0.01    0.20
   7   0   4    0.01    0.09
   8   0   4    1.03    0.21
  -8   0  -4    1.27    0.26
   8   0   4    0.97    0.13
  -9   0  -4    0.01    0.24
   9   0   4    0.13    0.19
  10   0   4    8.56    0.46
 -10   0  -4    8.44    0.50
  11   0   4   -0.15    0.23
 -11   0  -4    0.55    0.30
  10  -1  -4    2.95    0.24
 -10   1   4    3.05    0.37
   9  -1  -4    0.34    0.15
  -9  -1   4   -0.18    0.23
  -9  -1   4    0.27    0.21
  -9   1   4    0.16    0.24
   9   1  -4    0.03    0.14
   8  -1  -4    0.21    0.16
  -8  -1   4    0.11    0.21
  -8  -1   4    0.05    0.18
  -8  -1   4    0.05    0.15
  -8  -1   4    0.31    0.14
  -8   1   4    0.36    0.19
  -8   1   4    0.08    0.22
  -7  -1   4    1.52    0.20
  -7  -1   4    1.44    0.16
  -7  -1   4    1.24    0.17
  -7  -1   4    1.35    0.23
  -7   1   4    1.26    0.19
  -7   1   4    1.42    0.23
  -7   1   4    1.17    0.16
  -6  -1   4    0.42    0.17
  -6  -1   4    0.22    0.12
  -6  -1   4    0.21    0.11
  -6  -1   4    0.16    0.14
  -6   1   4    0.23    0.11
  -6   1   4    0.07    0.14
  -6   1   4    0.14    0.16
  -5  -1   4   21.58    0.63
  -5  -1   4   21.18    0.58
  -5  -1   4   20.89    0.68
  -5  -1   4   21.85    0.63
  -5   1   4   21.99    0.58
  -5   1   4   21.49    0.69
  -5   1   4   21.64    0.63
  -4  -1   4   65.50    1.82
  -4  -1   4   66.63    1.59
  -4  -1   4   66.73    1.69
  -4  -1   4   67.45    1.74
  -4   1   4   66.79    1.60
  -4   1   4   66.72    1.68
  -4   1   4   66.56    1.83
   3  -1  -4    1.44    0.12
  -3  -1   4    1.59    0.13
  -3  -1   4    1.42    0.12
  -3  -1   4    1.55    0.13
  -3  -1   4    1.71    0.14
  -3   1   4    1.65    0.14
  -3   1   4    1.41    0.11
  -3   1   4    1.30    0.11
  -2  -1   4    0.67    0.08
  -2  -1   4    0.64    0.09
   2  -1  -4    0.61    0.10
  -2  -1   4    0.60    0.09
  -2   1   4    0.49    0.08
  -2   1   4    0.53    0.09
   2   1  -4    0.63    0.06
  -2   1   4    0.61    0.07
  -1  -1   4    1.16    0.09
   1  -1  -4    1.56    0.12
   1  -1  -4    1.38    0.06
  -1  -1   4    1.58    0.11
  -1  -1   4    1.54    0.13
  -1   1   4    1.25    0.11
   1   1  -4    1.65    0.09
  -1   1   4    1.31    0.09
   0  -1   4   33.70    0.88
   0  -1  -4   33.12    0.86
   0  -1   4   32.67    0.78
   0  -1  -4   34.01    0.83
   0   1   4   32.32    0.78
   0   1  -4   32.54    0.86
   0   1   4   32.61    0.88
   0   1  -4   34.50    0.83
   1  -1   4    0.79    0.05
  -1  -1  -4    0.69    0.08
  -1  -1  -4    0.56    0.11
  -1   1  -4    0.93    0.06
  -1   1  -4    0.76    0.11
   1   1   4    1.01    0.06
   1   1   4    0.83    0.08
  -1   1  -4    0.91    0.10
  -2  -1  -4   28.60    0.74
  -2  -1  -4   27.62    0.76
   2  -1   4   29.42    0.68
  -2   1  -4   28.46    0.76
  -2   1  -4   29.16    0.73
   2   1   4   27.69    0.79
   2   1   4   28.84    0.67
  -2   1  -4   28.43    0.82
  -3  -1  -4   29.90    0.83
   3  -1   4   29.71    0.73
  -3  -1  -4   30.20    0.79
  -3   1  -4   30.01    0.82
  -3   1  -4   29.29    0.88
   3   1   4   30.15    0.85
  -3   1  -4   30.10    0.78
   3   1   4   30.84    0.72
   4  -1   4    0.46    0.07
  -4  -1  -4    0.45    0.09
  -4  -1  -4    0.36    0.15
  -4   1  -4    0.49    0.15
   4   1   4    0.35    0.12
  -4   1  -4    0.60    0.08
   4   1   4    0.44    0.07
  -4   1  -4    0.55    0.16
  -5  -1  -4    0.44    0.10
   5  -1   4    0.59    0.09
  -5  -1  -4    0.28    0.16
  -5   1  -4    0.47    0.18
   5   1   4    0.34    0.13
  -5   1  -4    0.43    0.17
  -5   1  -4    0.34    0.09
   5   1   4    0.27    0.07
  -6  -1  -4   20.83    0.68
   6  -1   4   21.27    0.57
  -6  -1  -4   22.45    0.62
   6   1   4   20.64    0.68
   6   1   4   21.67    0.56
  -6   1  -4   21.85    0.60
  -6   1  -4   21.20    0.75
  -6   1  -4   21.10    0.68
   7  -1   4   11.19    0.36
  -7  -1  -4   11.44    0.38
  -7  -1  -4   10.70    0.48
  -7   1  -4   10.50    0.53
  -7   1  -4   11.18    0.48
   7   1   4   11.45    0.45
   7   1   4   11.10    0.35
   8  -1   4    0.05    0.11
  -8  -1  -4    0.09    0.23
   8   1   4   -0.05    0.17
  -8   1  -4    0.06    0.23
  -9  -1  -4    1.93    0.29
  -9   1  -4    1.81    0.30
   9   1   4    1.57    0.25
 -10  -1  -4    2.75    0.34
  10  -1   4    2.89    0.30
  10   1   4    2.91    0.30
 -10   1  -4    3.26    0.35
  11  -1   4    0.10    0.24
 -11  -1  -4    0.34    0.29
  11   1   4    0.09    0.24
 -11   1  -4    0.37    0.29
 -12  -1  -4    0.41    0.31
 -11   2   4   -0.03    0.30
  10  -2  -4    2.70    0.24
 -10  -2   4    2.78    0.30
 -10   2   4    3.10    0.37
  10   2  -4    2.52    0.26
  -9  -2   4    0.27    0.20
   9  -2  -4    0.68    0.16
  -9  -2   4    0.43    0.18
  -9   2   4    0.38    0.26
  -8  -2   4    2.44    0.22
  -8  -2   4    2.31    0.20
   8  -2  -4    2.45    0.23
  -8  -2   4    2.56    0.29
  -8  -2   4    2.24    0.24
   8  -2  -4    2.33    0.21
  -8   2   4    2.61    0.31
  -8   2   4    2.69    0.25
   7  -2  -4   22.82    0.69
  -7  -2   4   22.63    0.70
  -7  -2   4   23.05    0.64
  -7  -2   4   22.47    0.77
  -7  -2   4   23.34    0.69
  -7   2   4   23.17    0.70
  -7   2   4   21.37    0.78
   6  -2  -4    0.14    0.12
  -6  -2   4    0.10    0.13
  -6  -2   4    0.35    0.14
  -6  -2   4    0.63    0.17
  -6  -2   4    0.17    0.11
  -6   2   4    0.02    0.11
  -6   2   4    0.14    0.17
  -6   2   4    0.01    0.14
  -5  -2   4   15.31    0.53
  -5  -2   4   15.71    0.48
  -5  -2   4   15.67    0.48
   5  -2  -4   14.57    0.47
  -5  -2   4   15.71    0.43
  -5   2   4   14.46    0.47
  -5   2   4   14.03    0.53
  -5   2   4   14.99    0.45
  -4  -2   4   37.24    1.05
  -4  -2   4   37.37    1.00
  -4  -2   4   37.30    0.98
  -4  -2   4   38.27    0.91
   4  -2  -4   35.18    0.99
  -4   2   4   36.96    0.97
  -4   2   4   36.94    0.93
  -4   2   4   36.11    1.06
  -3  -2   4    1.07    0.09
  -3  -2   4    0.81    0.11
  -3  -2   4    0.91    0.11
   3  -2  -4    0.91    0.11
  -3   2   4    1.07    0.10
  -3   2   4    1.09    0.13
  -3   2   4    0.80    0.10
  -2  -2   4   41.96    1.00
  -2  -2   4   43.10    1.13
   2  -2  -4   41.20    1.09
  -2  -2   4   41.71    1.10
  -2   2   4   41.94    1.14
  -2   2   4   41.47    1.01
  -2   2   4   43.32    1.04
   2   2  -4   41.06    1.05
  -1  -2   4    6.02    0.22
   1  -2  -4    6.36    0.23
  -1  -2   4    6.12    0.18
  -1   2   4    6.08    0.21
   1   2  -4    6.46    0.19
  -1   2   4    5.93    0.21
   0  -2  -4   10.30    0.30
   0  -2  -4   10.42    0.30
   0  -2   4   10.57    0.29
   0  -2   4   10.03    0.26
   0   2   4    9.80    0.29
   0   2  -4   10.11    0.29
   0   2   4   10.14    0.27
   0   2  -4   10.66    0.31
   1  -2   4    1.25    0.09
  -1  -2  -4    1.13    0.12
  -1  -2  -4    1.14    0.10
  -1   2  -4    1.18    0.08
  -1   2  -4    1.22    0.11
   1   2   4    1.51    0.12
   1   2   4    1.29    0.06
  -1   2  -4    1.10    0.12
  -2  -2  -4    3.24    0.14
  -2  -2  -4    2.66    0.21
   2  -2   4    3.24    0.13
   2   2   4    3.49    0.18
  -2   2  -4    3.04    0.22
   2   2   4    3.01    0.10
  -2   2  -4    3.06    0.20
   3  -2   4    1.88    0.12
  -3  -2  -4    1.71    0.16
  -3  -2  -4    1.63    0.13
   3   2   4    1.42    0.13
  -3   2  -4    1.76    0.17
   3   2   4    1.40    0.09
  -3   2  -4    1.48    0.15
  -3   2  -4    1.63    0.09
  -4  -2  -4   17.69    0.56
  -4  -2  -4   17.57    0.50
   4  -2   4   17.09    0.46
   4   2   4   17.87    0.54
   4   2   4   17.48    0.44
  -4   2  -4   16.80    0.54
  -4   2  -4   17.23    0.47
  -4   2  -4   16.76    0.60
   5  -2   4   12.94    0.37
  -5  -2  -4   12.04    0.46
  -5  -2  -4   13.48    0.40
   5   2   4   12.56    0.45
  -5   2  -4   12.80    0.46
  -5   2  -4   12.94    0.51
   5   2   4   13.04    0.35
  -5   2  -4   12.98    0.38
  -6  -2  -4    1.58    0.15
   6  -2   4    1.48    0.13
  -6  -2  -4    1.20    0.21
  -6   2  -4    1.44    0.23
   6   2   4    1.75    0.12
  -6   2  -4    1.55    0.22
   6   2   4    1.53    0.18
  -6   2  -4    1.48    0.12
   7  -2   4    8.44    0.30
  -7  -2  -4    8.75    0.33
  -7  -2  -4    7.66    0.42
  -7   2  -4    8.00    0.42
  -7   2  -4    9.07    0.47
   7   2   4    7.93    0.28
   7   2   4    8.27    0.39
  -8  -2  -4    2.18    0.28
   8  -2   4    1.84    0.16
  -8   2  -4    1.98    0.28
  -8   2  -4    1.92    0.31
   8   2   4    1.97    0.23
   9  -2   4   12.90    0.42
  -9  -2  -4   13.30    0.57
   9   2   4   13.05    0.54
  -9   2  -4   12.54    0.57
  10  -2   4    0.72    0.24
 -10  -2  -4    0.86    0.29
  10   2   4    0.31    0.22
 -10   2  -4    0.90    0.29
 -11  -2  -4    0.15    0.28
  11  -2   4    0.00    0.24
 -11   2  -4    0.23    0.29
  11   2   4   -0.04    0.23
 -12  -2  -4    0.62    0.31
  12   2   4    0.67    0.27
 -12   3   4    0.00    0.34
 -11   3   4   -0.05    0.30
  10  -3  -4    1.36    0.20
 -10  -3   4    1.70    0.27
 -10   3   4    1.61    0.32
  -9  -3   4   -0.06    0.17
  -9  -3   4    0.08    0.20
   9  -3  -4    0.30    0.16
   9   3  -4    0.03    0.16
  -9   3   4    0.53    0.26
  -8  -3   4    0.38    0.20
  -8  -3   4    0.63    0.17
   8  -3  -4    0.66    0.16
  -8  -3   4    0.63    0.15
   8   3  -4    0.91    0.17
  -8   3   4    0.53    0.24
  -7  -3   4    2.70    0.23
  -7  -3   4    2.02    0.21
  -7  -3   4    2.35    0.18
   7  -3  -4    2.43    0.21
  -7   3   4    2.11    0.21
  -7   3   4    2.13    0.26
  -6  -3   4    0.62    0.17
  -6  -3   4    0.70    0.12
  -6  -3   4    0.56    0.14
  -6  -3   4    0.82    0.16
   6  -3  -4    0.46    0.13
  -6   3   4    0.60    0.18
  -6   3   4    0.48    0.15
  -6   3   4    0.64    0.13
  -5  -3   4    0.78    0.13
  -5  -3   4    0.77    0.11
  -5  -3   4    0.63    0.14
  -5  -3   4    0.76    0.14
   5  -3  -4    0.85    0.12
  -5   3   4    0.77    0.16
  -5   3   4    0.87    0.13
  -5   3   4    0.61    0.12
  -4  -3   4    1.81    0.16
  -4  -3   4    1.68    0.12
  -4  -3   4    1.69    0.15
   4  -3  -4    1.76    0.14
  -4   3   4    1.78    0.14
  -4   3   4    1.85    0.18
  -4   3   4    1.58    0.14
  -3  -3   4    0.08    0.09
   3  -3  -4    0.10    0.09
  -3  -3   4    0.06    0.07
  -3  -3   4   -0.07    0.09
  -3   3   4    0.09    0.08
   3   3  -4    0.03    0.07
  -3   3   4   -0.04    0.10
  -3   3   4    0.06    0.09
  -2  -3   4   43.55    1.17
   2  -3  -4   45.09    1.16
  -2  -3   4   43.53    1.06
  -2   3   4   46.21    1.22
  -2   3   4   47.00    1.11
   2   3  -4   45.00    1.12
   2   3  -4   42.54    1.19
  -2   3   4   45.24    1.08
  -1  -3   4    1.02    0.10
   1  -3  -4    1.67    0.15
  -1  -3   4    1.35    0.10
  -1   3   4    1.00    0.09
  -1   3   4    1.09    0.09
   1   3  -4    1.27    0.11
   0  -3  -4   48.52    1.28
   0  -3   4   50.43    1.27
   0  -3   4   48.74    1.16
   0  -3  -4   51.20    1.23
   0   3  -4   50.37    1.32
   0   3   4   47.62    1.31
   0   3   4   49.60    1.16
   0   3  -4   50.63    1.23
  -1  -3  -4    1.42    0.11
   1  -3   4    1.98    0.10
  -1  -3  -4    1.46    0.13
   1  -3   4    1.78    0.08
   1   3   4    1.54    0.07
  -1   3  -4    1.69    0.15
   1   3   4    1.89    0.11
  -1   3  -4    1.62    0.13
   2  -3   4    0.04    0.06
  -2  -3  -4   -0.03    0.11
  -2  -3  -4    0.01    0.07
  -2   3  -4   -0.01    0.10
  -2   3  -4    0.06    0.11
   2   3   4    0.09    0.07
  -3  -3  -4    0.22    0.13
   3  -3   4    0.09    0.07
  -3  -3  -4    0.20    0.08
  -3   3  -4    0.05    0.13
  -3   3  -4   -0.05    0.11
   3   3   4    0.16    0.09
   3   3   4    0.04    0.04
   4  -3   4   41.71    1.03
  -4  -3  -4   43.54    1.15
  -4  -3  -4   43.32    1.13
   4   3   4   42.49    1.18
   4   3   4   43.17    1.01
  -4   3  -4   40.99    1.13
  -4   3  -4   41.99    1.23
  -5  -3  -4    0.97    0.18
  -5  -3  -4    1.17    0.12
   5  -3   4    0.86    0.10
   5   3   4    1.01    0.08
  -5   3  -4    1.13    0.18
   5   3   4    0.93    0.14
  -5   3  -4    0.97    0.19
  -6  -3  -4   13.28    0.51
   6  -3   4   13.36    0.40
  -6  -3  -4   13.63    0.44
   6   3   4   13.14    0.38
  -6   3  -4   13.54    0.51
   6   3   4   14.00    0.49
  -6   3  -4   14.33    0.57
  -7  -3  -4    0.85    0.15
   7  -3   4    0.75    0.12
  -7  -3  -4    0.39    0.21
  -7   3  -4    0.87    0.23
  -7   3  -4    0.86    0.25
   7   3   4    0.82    0.18
  -8  -3  -4    0.03    0.22
   8  -3   4    0.02    0.12
   8   3   4   -0.02    0.17
  -8   3  -4    0.25    0.23
  -8   3  -4    0.33    0.26
  -9  -3  -4   -0.10    0.24
   9  -3   4    0.28    0.13
   9   3   4   -0.10    0.18
  -9   3  -4    0.15    0.28
  -9   3  -4    0.35    0.26
 -10  -3  -4    1.55    0.30
 -10   3  -4    1.61    0.31
  10   3   4    1.84    0.26
  11  -3   4    1.70    0.29
 -11  -3  -4    1.81    0.34
  11   3   4    1.53    0.28
  12   3   4    3.10    0.34
  11  -4  -4    1.04    0.21
 -11   4   4    1.07    0.35
  10  -4  -4    2.38    0.24
 -10   4   4    2.07    0.35
   9  -4  -4    1.98    0.21
  -9  -4   4    2.28    0.24
   9   4  -4    1.69    0.21
  -9   4   4    1.93    0.31
  -8  -4   4    1.32    0.16
   8  -4  -4    1.01    0.17
  -8  -4   4    0.92    0.18
  -8  -4   4    0.82    0.21
   8   4  -4    0.98    0.17
  -8   4   4    0.63    0.25
   7  -4  -4    1.93    0.18
  -7  -4   4    1.97    0.20
  -7  -4   4    1.97    0.22
  -7  -4   4    1.94    0.17
   7  -4  -4    1.52    0.18
  -7   4   4    1.98    0.21
   7   4  -4    1.90    0.18
  -7   4   4    1.70    0.25
  -6  -4   4    2.24    0.21
   6  -4  -4    1.65    0.16
  -6  -4   4    1.86    0.18
  -6  -4   4    2.17    0.16
   6   4  -4    1.97    0.16
  -6   4   4    1.82    0.23
  -6   4   4    1.70    0.18
  -5  -4   4    2.54    0.17
   5  -4  -4    2.75    0.18
  -5  -4   4    2.09    0.19
  -5   4   4    2.36    0.22
  -5   4   4    2.83    0.20
  -5   4   4    2.42    0.17
   5   4  -4    2.40    0.18
  -4  -4   4    6.42    0.27
   4  -4  -4    6.17    0.26
  -4  -4   4    6.17    0.23
   4   4  -4    5.95    0.24
   4   4  -4    6.41    0.25
  -4   4   4    6.56    0.27
  -4   4   4    6.54    0.32
  -4   4   4    6.59    0.26
   3  -4  -4    1.84    0.15
  -3  -4   4    1.43    0.10
  -3  -4   4    1.37    0.13
  -3   4   4    1.46    0.11
  -3   4   4    1.71    0.15
   3   4  -4    1.60    0.11
   3   4  -4    1.40    0.13
  -3   4   4    1.36    0.12
   2  -4  -4    0.30    0.09
  -2  -4   4    0.52    0.06
  -2  -4   4    0.61    0.09
   2   4  -4    0.55    0.05
  -2   4   4    0.39    0.06
   2   4  -4    0.51    0.07
  -2   4   4    0.40    0.10
  -2   4   4    0.41    0.09
   1  -4  -4   13.89    0.42
  -1  -4   4   14.84    0.37
  -1  -4   4   13.30    0.41
   1   4  -4   15.16    0.39
  -1   4   4   13.82    0.42
  -1   4   4   14.16    0.39
  -1   4   4   15.81    0.36
   1   4  -4   15.45    0.39
   0  -4  -4    4.32    0.19
   0  -4   4    4.91    0.18
   0  -4  -4    4.81    0.20
   0  -4   4    4.80    0.15
   0   4  -4    5.43    0.19
   0   4   4    4.35    0.17
   0   4   4    4.82    0.17
   0   4  -4    5.15    0.18
  -1  -4  -4    2.76    0.20
   1  -4   4    2.64    0.11
  -1  -4  -4    2.49    0.15
   1  -4   4    2.74    0.12
  -1   4  -4    2.97    0.16
  -1   4  -4    2.74    0.20
   1   4   4    2.98    0.13
   2  -4   4    1.83    0.12
  -2  -4  -4    1.81    0.15
  -2  -4  -4    1.67    0.13
   2   4   4    1.82    0.13
  -2   4  -4    1.71    0.16
  -2   4  -4    1.90    0.14
  -3  -4  -4    0.95    0.11
   3  -4   4    1.03    0.09
  -3  -4  -4    0.99    0.15
  -3   4  -4    1.01    0.16
   3   4   4    1.10    0.11
  -3   4  -4    1.18    0.15
   3   4   4    0.96    0.07
   4  -4   4    9.90    0.30
  -4  -4  -4    9.69    0.32
  -4  -4  -4    9.83    0.39
   4  -4   4    9.07    0.27
  -4   4  -4    9.65    0.38
   4   4   4    9.56    0.26
  -4   4  -4    9.63    0.41
   4   4   4   10.07    0.35
   5  -4   4   12.80    0.37
   5  -4   4   12.50    0.36
  -5  -4  -4   12.98    0.41
  -5  -4  -4   13.16    0.47
   5   4   4   12.64    0.34
   5   4   4   12.44    0.44
  -5   4  -4   12.57    0.45
  -5   4  -4   12.35    0.51
  -6  -4  -4    6.97    0.30
  -6  -4  -4    6.81    0.37
   6  -4   4    7.19    0.27
   6   4   4    6.67    0.32
   6   4   4    6.87    0.24
  -6   4  -4    7.35    0.42
  -6   4  -4    7.13    0.37
  -7  -4  -4    1.51    0.17
  -7  -4  -4    1.20    0.23
   7  -4   4    1.02    0.14
  -7   4  -4    1.01    0.26
  -7   4  -4    1.31    0.24
   7   4   4    1.11    0.18
  -8  -4  -4    1.06    0.18
  -8  -4  -4    0.78    0.25
   8  -4   4    0.84    0.14
   8   4   4    0.90    0.19
  -8   4  -4    1.00    0.25
  -8   4  -4    0.87    0.28
   9  -4   4    8.43    0.33
  -9  -4  -4    7.34    0.46
   9   4   4    7.27    0.40
  -9   4  -4    7.87    0.53
  -9   4  -4    8.20    0.48
 -10  -4  -4    1.20    0.29
 -10   4  -4    1.55    0.31
 -10   4  -4    1.12    0.34
  10   4   4    1.08    0.23
 -11  -4  -4   14.59    0.66
  11   4   4   15.07    0.63
  12   4   4    0.42    0.25
  11  -5  -4    1.96    0.24
 -11   5   4    1.98    0.38
  11   5  -4    1.98    0.25
  10  -5  -4   10.17    0.42
 -10  -5   4   10.57    0.47
  10   5  -4    9.85    0.43
 -10   5   4    9.51    0.58
  -9  -5   4    4.23    0.30
   9  -5  -4    4.24    0.28
  -9   5   4    4.22    0.39
  -8  -5   4    0.42    0.17
   8  -5  -4    0.27    0.15
  -8   5   4    0.20    0.24
   8   5  -4    0.35    0.14
   7  -5  -4   18.36    0.55
  -7  -5   4   18.72    0.53
  -7  -5   4   18.26    0.59
   7  -5  -4   17.46    0.57
  -7   5   4   17.11    0.68
   7   5  -4   18.00    0.59
  -6  -5   4    0.02    0.13
  -6  -5   4    0.02    0.10
   6  -5  -4    0.02    0.12
   6  -5  -4   -0.22    0.12
   6   5  -4    0.04    0.10
  -6   5   4   -0.23    0.17
  -6   5   4    0.13    0.14
  -5  -5   4    1.46    0.16
  -5  -5   4    1.24    0.12
   5  -5  -4    1.50    0.14
  -5   5   4    1.44    0.15
   5   5  -4    1.08    0.13
   5   5  -4    1.11    0.11
  -5   5   4    1.49    0.19
  -4  -5   4   12.44    0.41
  -4  -5   4   12.03    0.35
   4  -5  -4   12.24    0.39
  -4   5   4   11.53    0.45
  -4   5   4   12.81    0.38
   4   5  -4   11.74    0.38
   4   5  -4   12.95    0.38
  -3  -5   4    3.02    0.19
   3  -5  -4    2.99    0.17
  -3  -5   4    2.87    0.15
  -3   5   4    2.63    0.17
   3   5  -4    2.64    0.16
  -3   5   4    2.43    0.22
   3   5  -4    2.78    0.14
  -3   5   4    2.51    0.18
  -2  -5   4   16.87    0.49
   2  -5  -4   16.99    0.49
  -2  -5   4   16.82    0.43
  -2   5   4   17.85    0.44
   2   5  -4   16.70    0.46
   2   5  -4   17.47    0.46
  -2   5   4   17.12    0.46
  -2   5   4   17.33    0.52
   1  -5  -4   24.75    0.68
  -1  -5   4   24.58    0.69
  -1  -5   4   25.38    0.61
   1   5  -4   25.32    0.65
   1   5  -4   26.29    0.67
  -1   5   4   24.91    0.70
  -1   5   4   24.95    0.63
  -1   5   4   26.62    0.63
   0  -5   4  421.01    9.83
   0  -5   4  423.59   10.72
   0  -5  -4  428.07   10.77
   0   5  -4  442.60   11.12
   0   5  -4  428.03   10.38
   0   5   4  401.89   11.15
   1  -5   4   13.90    0.39
  -1  -5  -4   14.11    0.42
  -1  -5  -4   14.01    0.41
  -1  -5  -4   15.29    0.35
   1  -5   4   14.17    0.37
   1   5   4   14.21    0.41
  -1   5  -4   14.94    0.41
  -1   5  -4   15.10    0.45
   2  -5   4    1.27    0.07
   2  -5   4    1.32    0.09
  -2  -5  -4    1.36    0.14
  -2  -5  -4    1.47    0.12
  -2   5  -4    1.27    0.15
  -2   5  -4    1.43    0.12
   2   5   4    1.43    0.12
  -3  -5  -4   17.77    0.55
   3  -5   4   18.31    0.47
  -3  -5  -4   18.29    0.52
  -3   5  -4   17.74    0.53
  -3   5  -4   16.96    0.59
   3   5   4   17.96    0.53
   4  -5   4   -0.04    0.08
  -4  -5  -4   -0.05    0.10
  -4  -5  -4   -0.03    0.14
  -4   5  -4    0.13    0.15
   4   5   4    0.10    0.09
   4   5   4    0.04    0.04
  -4   5  -4    0.12    0.13
  -5  -5  -4    3.18    0.21
  -5  -5  -4    2.74    0.23
   5  -5   4    3.22    0.18
   5   5   4    3.39    0.21
  -5   5  -4    3.10    0.23
  -5   5  -4    2.80    0.26
   5   5   4    3.40    0.14
  -6  -5  -4    8.16    0.33
  -6  -5  -4    7.75    0.39
   6  -5   4    7.71    0.29
  -6   5  -4    7.33    0.43
  -6   5  -4    8.11    0.39
   6   5   4    7.85    0.34
   7  -5   4    3.97    0.22
  -7  -5  -4    4.58    0.27
  -7  -5  -4    4.19    0.34
  -7   5  -4    4.52    0.37
   7   5   4    4.14    0.28
  -7   5  -4    3.55    0.34
  -8  -5  -4    1.70    0.20
  -8  -5  -4    1.49    0.27
   8  -5   4    1.86    0.17
  -8   5  -4    1.92    0.32
   8   5   4    1.71    0.21
  -8   5  -4    1.82    0.28
  -9  -5  -4   11.39    0.55
   9  -5   4   12.04    0.42
   9   5   4   12.86    0.52
  -9   5  -4   13.14    0.64
  -9   5  -4   13.26    0.57
  10  -5   4    2.95    0.23
 -10  -5  -4    3.34    0.36
  10   5   4    2.88    0.29
 -10   5  -4    3.27    0.42
 -11  -5  -4    0.19    0.28
  11   5   4   -0.03    0.21
 -11   5  -4   -0.02    0.34
  11  -6  -4    0.10    0.19
  11   6  -4    0.06    0.19
 -11   6   4    0.34    0.33
 -10  -6   4    1.77    0.25
  10  -6  -4    1.69    0.22
 -10   6   4    1.72    0.34
  10   6  -4    1.85    0.22
  -9  -6   4    4.92    0.32
   9  -6  -4    4.47    0.29
   9   6  -4    4.98    0.30
  -9   6   4    5.11    0.44
   8  -6  -4   -0.04    0.15
  -8  -6   4   -0.05    0.16
  -8   6   4    0.06    0.23
   8   6  -4    0.18    0.15
   7  -6  -4    0.25    0.14
  -7  -6   4    0.08    0.11
  -7  -6   4    0.14    0.16
  -7   6   4    0.53    0.22
   7   6  -4    0.21    0.13
   7   6  -4    0.23    0.12
   6  -6  -4   26.02    0.75
   6  -6  -4   26.31    0.72
  -6  -6   4   27.77    0.69
  -6  -6   4   25.32    0.78
  -6   6   4   27.99    0.76
  -6   6   4   25.18    0.86
   6   6  -4   24.82    0.77
   6   6  -4   27.12    0.74
  -5  -6   4   29.90    0.83
   5  -6  -4   28.02    0.76
   5  -6  -4   28.21    0.80
  -5  -6   4   29.64    0.73
   5   6  -4   28.45    0.78
   5   6  -4   28.64    0.81
  -5   6   4   26.93    0.88
  -5   6   4   29.32    0.78
   4  -6  -4   59.07    1.58
   4  -6  -4   61.83    1.47
  -4  -6   4   61.99    1.60
  -4  -6   4   60.14    1.44
   4   6  -4   58.87    1.53
  -4   6   4   59.23    1.68
   4   6  -4   60.78    1.62
  -4   6   4   61.91    1.52
  -3  -6   4    8.00    0.25
  -3  -6   4    8.10    0.30
   3  -6  -4    8.12    0.29
   3   6  -4    8.09    0.25
  -3   6   4    7.66    0.33
  -3   6   4    7.93    0.27
   3   6  -4    8.45    0.28
  -2  -6   4   14.13    0.38
   2  -6  -4   15.02    0.44
  -2  -6   4   14.49    0.44
   2   6  -4   14.61    0.40
  -2   6   4   15.27    0.39
   2   6  -4   14.85    0.41
  -2   6   4   15.68    0.47
  -1  -6   4   30.93    0.73
   1  -6  -4   29.15    0.82
   1  -6  -4   29.45    0.75
  -1  -6   4   29.67    0.82
   1   6  -4   31.67    0.78
  -1   6   4   32.44    0.76
   1   6  -4   32.13    0.82
  -1   6   4   29.99    0.84
   0  -6   4    0.11    0.05
   0  -6   4    0.05    0.08
   0  -6  -4    0.10    0.08
   0  -6  -4    0.22    0.06
   0   6  -4    0.19    0.07
   0   6   4    0.10    0.06
   0   6  -4    0.08    0.07
   0   6   4    0.07    0.06
   1  -6   4   19.01    0.51
  -1  -6  -4   19.72    0.45
   1  -6   4   18.47    0.48
  -1  -6  -4   18.75    0.53
  -1  -6  -4   18.93    0.54
   1   6   4   19.38    0.53
  -1   6  -4   19.05    0.52
  -1   6  -4   18.95    0.57
  -2  -6  -4    3.75    0.24
  -2  -6  -4    3.46    0.17
   2  -6   4    3.98    0.16
   2  -6   4    3.86    0.13
  -2   6  -4    3.78    0.25
   2   6   4    3.73    0.16
  -2   6  -4    4.10    0.20
  -3  -6  -4    1.28    0.17
   3  -6   4    1.00    0.10
  -3  -6  -4    0.91    0.12
   3   6   4    0.89    0.10
  -3   6  -4    0.90    0.17
  -3   6  -4    1.22    0.15
   4  -6   4    0.10    0.08
  -4  -6  -4    0.22    0.15
  -4  -6  -4    0.15    0.10
  -4   6  -4    0.18    0.14
   4   6   4    0.17    0.09
   4   6   4    0.13    0.04
  -4   6  -4    0.18    0.16
  -5  -6  -4    3.31    0.29
   5  -6   4    3.31    0.19
  -5  -6  -4    3.38    0.21
  -5   6  -4    3.28    0.28
   5   6   4    3.39    0.21
  -5   6  -4    2.88    0.26
  -6  -6  -4    5.68    0.35
   6  -6   4    5.91    0.25
  -6  -6  -4    5.70    0.28
  -6   6  -4    5.27    0.34
   6   6   4    5.58    0.28
  -6   6  -4    5.31    0.39
  -7  -6  -4   10.41    0.47
  -7  -6  -4   10.48    0.40
   7  -6   4   10.69    0.36
  -7   6  -4   10.20    0.53
  -7   6  -4   10.57    0.49
   7   6   4   10.57    0.42
   8  -6   4   21.49    0.62
  -8  -6  -4   19.88    0.73
  -8  -6  -4   21.56    0.68
   8   6   4   22.19    0.71
  -8   6  -4   22.38    0.75
  -8   6  -4   21.71    0.83
   9  -6   4    2.02    0.19
  -9  -6  -4    1.62    0.28
  -9   6  -4    1.46    0.33
  -9   6  -4    1.81    0.29
   9   6   4    1.85    0.23
 -10  -6  -4    4.58    0.38
  10  -6   4    4.34    0.28
  10   6   4    4.69    0.34
 -10   6  -4    3.75    0.44
 -11  -6  -4    4.29    0.40
  11   6   4    4.01    0.34
 -11   6  -4    3.73    0.48
  11  -7  -4    0.68    0.21
 -11   7   4    0.56    0.34
  11   7  -4    0.95    0.21
 -10  -7   4    4.70    0.33
  10  -7  -4    4.56    0.31
  10   7  -4    4.36    0.31
 -10   7   4    4.28    0.44
  -9  -7   4    0.85    0.21
   9  -7  -4    0.69    0.18
  -9   7   4    0.63    0.29
   9   7  -4    0.72    0.18
  -8  -7   4   -0.05    0.16
   8  -7  -4    0.08    0.15
   8   7  -4    0.12    0.15
  -8   7   4   -0.08    0.23
  -7  -7   4    4.94    0.29
   7  -7  -4    4.42    0.27
  -7   7   4    4.28    0.37
   7   7  -4    4.54    0.27
   7   7  -4    4.67    0.25
  -6  -7   4    0.64    0.16
  -6  -7   4    0.73    0.12
   6  -7  -4    1.10    0.16
   6  -7  -4    0.97    0.15
  -6   7   4    1.29    0.22
   6   7  -4    0.71    0.14
   6   7  -4    0.83    0.12
   5  -7  -4    0.54    0.13
   5  -7  -4    0.92    0.14
  -5  -7   4    0.92    0.11
  -5  -7   4    0.94    0.15
   5   7  -4    0.79    0.12
   5   7  -4    0.72    0.10
  -5   7   4    0.73    0.14
  -5   7   4    0.55    0.17
  -4  -7   4   13.57    0.46
   4  -7  -4   14.10    0.43
  -4  -7   4   14.22    0.38
   4  -7  -4   13.64    0.42
  -4   7   4   13.95    0.50
   4   7  -4   14.33    0.42
  -4   7   4   14.92    0.42
   4   7  -4   13.31    0.41
   3  -7  -4    0.23    0.10
  -3  -7   4    0.16    0.10
  -3  -7   4    0.15    0.07
   3  -7  -4    0.23    0.12
  -3   7   4    0.43    0.13
  -3   7   4    0.39    0.09
   3   7  -4    0.20    0.09
   3   7  -4    0.26    0.05
   2  -7  -4   29.68    0.75
  -2  -7   4   30.17    0.72
   2  -7  -4   29.72    0.81
  -2  -7   4   29.56    0.83
  -2   7   4   29.27    0.85
  -2   7   4   30.41    0.76
   2   7  -4   30.76    0.78
   2   7  -4   31.01    0.80
  -1  -7   4   10.95    0.29
   1  -7  -4   10.91    0.32
  -1  -7   4   11.07    0.35
   1  -7  -4   11.10    0.34
  -1   7   4   11.39    0.29
  -1   7   4   10.74    0.35
   1   7  -4   11.28    0.32
   1   7  -4   10.73    0.32
   0  -7   4   90.88    2.30
   0  -7  -4   89.15    2.31
   0  -7  -4   92.31    2.10
   0  -7   4   90.92    2.10
   0   7   4   86.87    2.21
   0   7   4   87.14    2.38
   0   7  -4   93.88    2.23
   0   7  -4   90.58    2.39
  -1  -7  -4    1.24    0.08
   1  -7   4    1.13    0.09
   1  -7   4    1.31    0.09
  -1  -7  -4    1.16    0.12
  -1   7  -4    1.29    0.13
   1   7   4    1.28    0.11
  -1   7  -4    1.49    0.11
  -2  -7  -4    0.10    0.12
  -2  -7  -4   -0.10    0.08
   2  -7   4    0.06    0.07
   2  -7   4    0.14    0.06
  -2   7  -4    0.20    0.11
  -2   7  -4   -0.01    0.12
   2   7   4    0.04    0.06
  -3  -7  -4   28.63    0.79
   3  -7   4   28.87    0.72
   3  -7   4   28.89    0.74
  -3  -7  -4   28.86    0.81
   3   7   4   28.46    0.80
  -3   7  -4   28.66    0.79
  -3   7  -4   28.84    0.87
  -4  -7  -4    0.58    0.12
   4  -7   4    0.70    0.10
  -4  -7  -4    0.55    0.16
   4   7   4    0.63    0.10
  -4   7  -4    0.58    0.15
  -4   7  -4    0.62    0.17
   5  -7   4    3.65    0.20
  -5  -7  -4    4.17    0.29
  -5  -7  -4    4.10    0.23
   5   7   4    4.01    0.22
  -5   7  -4    4.06    0.33
  -5   7  -4    3.60    0.28
  -6  -7  -4    5.35    0.27
  -6  -7  -4    5.73    0.35
   6  -7   4    4.94    0.24
  -6   7  -4    4.42    0.37
   6   7   4    5.38    0.27
  -6   7  -4    4.89    0.34
   7  -7   4    0.99    0.14
  -7  -7  -4    0.65    0.22
  -7  -7  -4    0.93    0.18
   7   7   4    0.64    0.16
  -7   7  -4    1.04    0.26
  -7   7  -4    1.04    0.24
  -8  -7  -4    3.31    0.31
  -8  -7  -4    3.17    0.26
   8  -7   4    3.65    0.24
  -8   7  -4    3.24    0.33
   8   7   4    3.33    0.27
  -8   7  -4    2.99    0.35
  -9  -7  -4   -0.03    0.23
   9  -7   4    0.10    0.14
  -9   7  -4   -0.48    0.26
   9   7   4    0.04    0.17
  -9   7  -4   -0.38    0.24
  10  -7   4    0.33    0.16
 -10  -7  -4    0.10    0.24
  10   7   4    0.01    0.19
 -10   7  -4   -0.19    0.31
 -11  -7  -4    2.76    0.36
 -11   7  -4    2.91    0.45
  11  -8  -4    0.15    0.19
  11   8  -4   -0.05    0.19
 -11   8   4   -0.27    0.31
 -10  -8   4    0.41    0.21
  10  -8  -4    0.53    0.19
  10   8  -4    0.42    0.19
 -10   8   4    0.09    0.30
  -9  -8   4   11.61    0.48
   9  -8  -4   11.09    0.44
   9   8  -4   11.56    0.45
  -9   8   4   11.46    0.59
  -8  -8   4    0.10    0.17
   8  -8  -4    0.04    0.15
   8   8  -4    0.12    0.15
  -8   8   4    0.10    0.25
   7  -8  -4    1.92    0.19
  -7  -8   4    1.80    0.21
  -7   8   4    1.99    0.28
   7   8  -4    1.50    0.18
   6  -8  -4    2.50    0.22
  -6  -8   4    2.99    0.24
   6  -8  -4    2.26    0.19
  -6  -8   4    2.62    0.18
   6   8  -4    2.03    0.17
  -6   8   4    2.40    0.27
   6   8  -4    2.62    0.22
   5  -8  -4    6.24    0.28
  -5  -8   4    6.17    0.30
  -5  -8   4    6.64    0.24
   5  -8  -4    6.70    0.27
   5   8  -4    5.85    0.23
  -5   8   4    6.13    0.28
  -5   8   4    6.40    0.35
   5   8  -4    6.41    0.27
   4  -8  -4   13.33    0.43
   4  -8  -4   12.94    0.41
  -4  -8   4   13.86    0.37
  -4  -8   4   13.30    0.45
  -4   8   4   13.58    0.41
  -4   8   4   13.37    0.49
   4   8  -4   13.10    0.39
   4   8  -4   13.44    0.41
  -3  -8   4   28.01    0.79
  -3  -8   4   27.63    0.68
   3  -8  -4   27.55    0.72
   3  -8  -4   27.83    0.77
  -3   8   4   28.35    0.73
   3   8  -4   27.71    0.75
   3   8  -4   28.89    0.75
  -3   8   4   27.97    0.83
  -2  -8   4    0.20    0.11
  -2  -8   4    0.33    0.06
   2  -8  -4    0.54    0.10
   2  -8  -4    0.40    0.12
  -2   8   4    0.46    0.12
   2   8  -4    0.36    0.08
   2   8  -4    0.49    0.06
  -2   8   4    0.51    0.07
   1  -8  -4    4.94    0.19
   1  -8  -4    4.67    0.22
  -1  -8   4    5.20    0.22
  -1  -8   4    5.16    0.17
  -1   8   4    4.69    0.21
   1   8  -4    5.31    0.19
  -1   8   4    5.14    0.16
   1   8  -4    5.05    0.18
   0  -8  -4    4.99    0.20
   0  -8   4    5.20    0.21
   0  -8  -4    5.07    0.17
   0  -8   4    5.00    0.17
   0   8   4    4.80    0.20
   0   8   4    4.80    0.18
   0   8  -4    5.41    0.20
   0   8  -4    4.96    0.21
  -1  -8  -4    0.15    0.05
   1  -8   4    0.06    0.06
   1  -8   4    0.02    0.08
  -1  -8  -4    0.12    0.10
   1   8   4    0.08    0.07
  -1   8  -4    0.21    0.11
   1   8   4    0.16    0.08
  -1   8  -4    0.07    0.09
  -2  -8  -4   21.75    0.61
  -2  -8  -4   21.12    0.61
  -2  -8  -4   21.96    0.50
   2  -8   4   20.80    0.57
   2  -8   4   21.12    0.55
  -2   8  -4   21.41    0.59
   2   8   4   21.59    0.59
  -2   8  -4   19.58    0.65
   3  -8   4    5.15    0.21
   3  -8   4    5.28    0.17
  -3  -8  -4    5.09    0.28
  -3  -8  -4    5.00    0.24
  -3   8  -4    4.84    0.26
  -3   8  -4    4.87    0.29
   3   8   4    5.25    0.21
  -4  -8  -4    0.37    0.15
   4  -8   4    0.53    0.06
   4  -8   4    0.25    0.09
  -4  -8  -4    0.27    0.12
  -4   8  -4    0.26    0.16
   4   8   4    0.37    0.09
  -4   8  -4    0.17    0.14
   5  -8   4   14.28    0.42
  -5  -8  -4   13.93    0.51
  -5  -8  -4   14.06    0.47
  -5   8  -4   13.78    0.55
  -5   8  -4   13.89    0.49
   5   8   4   14.70    0.46
   6  -8   4   -0.09    0.11
  -6  -8  -4    0.17    0.18
  -6  -8  -4   -0.17    0.13
  -6   8  -4   -0.09    0.20
  -6   8  -4    0.04    0.19
   6   8   4   -0.04    0.11
  -7  -8  -4    5.08    0.36
  -7  -8  -4    5.28    0.31
   7  -8   4    5.20    0.27
  -7   8  -4    4.96    0.42
  -7   8  -4    5.02    0.38
   7   8   4    5.36    0.29
   8  -8   4    2.86    0.23
  -8  -8  -4    3.03    0.31
  -8  -8  -4    3.00    0.26
  -8   8  -4    2.77    0.35
   8   8   4    2.95    0.26
  -8   8  -4    3.73    0.34
   9  -8   4    0.15    0.15
  -9  -8  -4    0.05    0.23
  -9  -8  -4    0.46    0.20
  -9   8  -4    0.50    0.30
   9   8   4    0.40    0.18
  10  -8   4    0.14    0.17
 -10  -8  -4    0.21    0.25
 -10   8  -4    0.39    0.33
  10   8   4   -0.18    0.19
  11  -8   4    0.15    0.17
 -11  -8  -4    0.21    0.28
  11  -9  -4    0.47    0.21
  11   9  -4    0.66    0.22
 -11   9   4    0.48    0.35
  10  -9  -4    3.48    0.28
 -10  -9   4    3.44    0.32
 -10   9   4    3.28    0.42
  10   9  -4    3.68    0.29
  -9  -9   4    1.51    0.24
   9  -9  -4    0.76    0.20
   9   9  -4    1.20    0.20
  -9   9   4    1.31    0.32
   8  -9  -4    5.69    0.31
  -8  -9   4    6.31    0.35
  -8   9   4    6.44    0.46
   8   9  -4    6.25    0.32
  -7  -9   4    1.10    0.20
   7  -9  -4    1.43    0.19
   7   9  -4    0.96    0.17
  -7   9   4    1.24    0.26
  -6  -9   4    0.97    0.18
   6  -9  -4    0.76    0.16
   6  -9  -4    0.84    0.15
  -6   9   4    0.57    0.21
   6   9  -4    0.84    0.15
  -5  -9   4    0.75    0.16
   5  -9  -4    0.92    0.15
   5  -9  -4    0.86    0.14
  -5  -9   4    0.74    0.10
   5   9  -4    0.67    0.09
  -5   9   4    0.72    0.19
   5   9  -4    0.56    0.12
  -4  -9   4    2.52    0.20
  -4  -9   4    2.16    0.14
   4  -9  -4    2.13    0.16
   4  -9  -4    2.02    0.16
   4   9  -4    2.19    0.18
  -4   9   4    2.23    0.21
  -4   9   4    2.32    0.18
   4   9  -4    2.02    0.12
   3  -9  -4    1.13    0.12
  -3  -9   4    1.33    0.15
  -3  -9   4    1.01    0.08
   3  -9  -4    1.20    0.14
   3   9  -4    1.19    0.11
  -3   9   4    1.26    0.16
   3   9  -4    1.24    0.09
  -3   9   4    1.15    0.10
   2  -9  -4    6.48    0.25
   2  -9  -4    7.03    0.27
  -2  -9   4    7.20    0.21
  -2  -9   4    7.42    0.27
   2   9  -4    7.45    0.22
   2   9  -4    6.81    0.24
  -2   9   4    7.21    0.30
  -2   9   4    7.26    0.23
  -1  -9   4   12.42    0.33
   1  -9  -4   12.18    0.39
   1  -9  -4   12.57    0.35
  -1  -9   4   11.95    0.39
   1   9  -4   12.48    0.36
  -1   9   4   11.71    0.39
  -1   9   4   12.51    0.33
   1   9  -4   12.21    0.37
   0  -9  -4    1.03    0.13
   0  -9  -4    0.99    0.08
   0  -9   4    1.11    0.08
   0  -9   4    1.04    0.12
   0   9  -4    1.17    0.11
   0   9   4    1.08    0.10
   0   9  -4    1.09    0.10
   0   9   4    1.01    0.08
   1  -9   4    2.54    0.15
  -1  -9  -4    2.99    0.11
   1  -9   4    2.66    0.14
  -1  -9  -4    2.72    0.19
   1   9   4    2.99    0.16
   1   9   4    2.91    0.15
  -1   9  -4    2.75    0.18
  -1   9  -4    2.52    0.21
   2  -9   4   -0.04    0.07
  -2  -9  -4    0.09    0.11
   2  -9   4    0.07    0.08
  -2  -9  -4    0.08    0.03
   2   9   4    0.05    0.07
  -2   9  -4    0.13    0.13
   2   9   4    0.12    0.10
  -2   9  -4    0.03    0.11
   3  -9   4    2.59    0.16
  -3  -9  -4    2.56    0.19
  -3  -9  -4    2.35    0.20
   3  -9   4    2.81    0.13
   3   9   4    2.60    0.15
  -3   9  -4    2.55    0.21
  -3   9  -4    2.45    0.21
  -4  -9  -4   14.79    0.50
   4  -9   4   14.99    0.43
  -4  -9  -4   14.47    0.48
  -4   9  -4   15.12    0.56
  -4   9  -4   15.04    0.48
   4   9   4   14.67    0.46
  -5  -9  -4    2.06    0.22
   5  -9   4    2.27    0.18
  -5  -9  -4    1.93    0.19
  -5   9  -4    1.95    0.25
   5   9   4    2.28    0.18
  -5   9  -4    2.38    0.23
  -6  -9  -4    4.70    0.28
  -6  -9  -4    4.55    0.33
   6  -9   4    5.00    0.24
  -6   9  -4    5.23    0.35
   6   9   4    5.05    0.26
  -6   9  -4    4.28    0.38
  -7  -9  -4   27.51    0.83
  -7  -9  -4   26.09    0.85
   7  -9   4   27.83    0.75
  -7   9  -4   27.82    0.86
   7   9   4   27.05    0.82
  -7   9  -4   27.55    0.96
  -8  -9  -4    0.15    0.22
   8  -9   4    0.14    0.14
  -8  -9  -4    0.06    0.17
   8   9   4    0.44    0.16
  -8   9  -4    0.26    0.27
  -8   9  -4    0.11    0.24
  -9  -9  -4    0.03    0.19
  -9  -9  -4    0.07    0.23
   9  -9   4   -0.21    0.14
  -9   9  -4   -0.11    0.28
   9   9   4   -0.28    0.16
 -10  -9  -4    2.18    0.32
  10  -9   4    1.68    0.21
 -10   9  -4    1.44    0.38
  11  -9   4   -0.10    0.18
 -11 -10   4    0.21    0.24
  11 -10  -4    0.40    0.21
  11  10  -4    0.04    0.20
  10 -10  -4    0.09    0.18
 -10 -10   4   -0.14    0.20
  10  10  -4    0.20    0.18
 -10  10   4    0.20    0.32
  -9 -10   4    7.24    0.39
   9 -10  -4    6.76    0.36
   9  10  -4    7.29    0.36
  -9  10   4    6.98    0.51
  -8 -10   4    0.92    0.22
   8 -10  -4    0.53    0.18
  -8  10   4    1.15    0.29
   8  10  -4    0.69    0.17
   7 -10  -4    0.00    0.14
  -7 -10   4    0.03    0.17
   7  10  -4    0.01    0.14
  -7  10   4    0.00    0.23
   6 -10  -4    0.94    0.16
  -6 -10   4    1.13    0.18
  -6  10   4    1.52    0.25
   6  10  -4    1.23    0.16
  -5 -10   4    3.28    0.25
  -5 -10   4    3.68    0.19
   5 -10  -4    3.48    0.22
   5 -10  -4    3.23    0.22
  -5  10   4    3.02    0.27
   5  10  -4    3.30    0.22
   5  10  -4    3.53    0.17
   4 -10  -4   12.73    0.40
   4 -10  -4   13.14    0.41
  -4 -10   4   12.74    0.36
  -4 -10   4   12.56    0.44
   4  10  -4   12.01    0.40
  -4  10   4   11.64    0.47
  -4  10   4   12.71    0.39
   4  10  -4   12.70    0.37
  -3 -10   4    0.10    0.06
   3 -10  -4    0.26    0.12
  -3 -10   4    0.15    0.12
   3 -10  -4    0.19    0.10
   3  10  -4    0.16    0.06
  -3  10   4    0.14    0.13
  -3  10   4    0.25    0.09
   3  10  -4    0.27    0.09
   2 -10  -4    8.60    0.29
  -2 -10   4    8.45    0.33
   2 -10  -4    8.99    0.31
  -2 -10   4    8.30    0.25
   2  10  -4    8.94    0.27
  -2  10   4    8.73    0.27
   2  10  -4    8.46    0.29
  -2  10   4    8.84    0.34
  -1 -10   4   21.03    0.61
   1 -10  -4   20.56    0.61
  -1 -10   4   21.26    0.53
   1 -10  -4   21.11    0.55
   1  10  -4   21.34    0.57
   1  10  -4   21.64    0.60
  -1  10   4   21.77    0.55
  -1  10   4   21.22    0.63
   0 -10  -4    6.44    0.21
   0 -10   4    6.76    0.21
   0 -10  -4    6.61    0.27
   0 -10   4    6.62    0.25
   0  10  -4    7.06    0.25
   0  10   4    6.46    0.25
   0  10   4    6.45    0.22
   0  10  -4    6.85    0.27
   1 -10   4   21.81    0.56
   1 -10   4   21.18    0.61
  -1 -10  -4   21.98    0.63
  -1 -10  -4   22.71    0.53
   1  10   4   20.97    0.58
   1  10   4   22.32    0.62
  -1  10  -4   21.74    0.66
  -1  10  -4   22.20    0.60
  -2 -10  -4   16.93    0.52
   2 -10   4   16.41    0.47
  -2 -10  -4   16.98    0.40
   2 -10   4   16.52    0.45
   2  10   4   16.63    0.48
  -2  10  -4   16.25    0.55
   2  10   4   16.94    0.48
  -2  10  -4   17.02    0.49
   3 -10   4    0.34    0.09
  -3 -10  -4    0.23    0.12
   3 -10   4    0.10    0.08
  -3  10  -4    0.19    0.12
  -3  10  -4    0.47    0.16
   3  10   4    0.16    0.08
   4 -10   4    0.21    0.10
  -4 -10  -4    0.18    0.16
  -4 -10  -4    0.35    0.13
  -4  10  -4    0.53    0.18
   4  10   4    0.33    0.09
  -4  10  -4    0.30    0.15
  -5 -10  -4   11.01    0.44
  -5 -10  -4    9.80    0.39
   5 -10   4   10.58    0.35
  -5  10  -4    9.63    0.46
   5  10   4   10.46    0.36
  -5  10  -4    9.81    0.42
  -6 -10  -4    1.23    0.19
   6 -10   4    1.23    0.15
  -6 -10  -4    1.10    0.22
   6  10   4    0.99    0.14
  -6  10  -4    1.20    0.23
  -6  10  -4    0.92    0.25
   7 -10   4    0.49    0.14
  -7 -10  -4    0.61    0.22
  -7 -10  -4    0.40    0.18
  -7  10  -4    0.04    0.25
   7  10   4    0.33    0.14
  -7  10  -4    0.27    0.22
  -8 -10  -4    4.29    0.36
  -8 -10  -4    4.64    0.31
   8 -10   4    4.54    0.27
  -8  10  -4    4.69    0.44
   8  10   4    4.66    0.28
   9 -10   4    1.73    0.21
  -9 -10  -4    1.89    0.25
  -9 -10  -4    2.05    0.30
  -9  10  -4    1.77    0.35
   9  10   4    1.53    0.21
  10 -10   4    0.19    0.17
 -10 -10  -4    0.03    0.26
 -10  10  -4   -0.01    0.33
  11 -10   4    0.77    0.21
 -11 -11   4    0.77    0.25
  10 -11  -4    0.57    0.20
 -10 -11   4    0.62    0.24
 -10  11   4    0.48    0.33
  10  11  -4    0.76    0.20
   9 -11  -4    1.49    0.22
  -9 -11   4    1.29    0.26
   9  11  -4    1.99    0.22
  -9  11   4    2.21    0.36
   8 -11  -4    2.69    0.24
  -8 -11   4    2.90    0.28
  -8  11   4    2.30    0.34
   8  11  -4    1.98    0.21
  -7 -11   4    1.66    0.21
   7 -11  -4    1.38    0.19
  -7  11   4    1.20    0.28
   7  11  -4    1.59    0.19
   6 -11  -4   12.01    0.42
  -6 -11   4   11.92    0.47
   6  11  -4   12.97    0.43
  -6  11   4   11.12    0.53
  -5 -11   4   -0.01    0.13
   5 -11  -4    0.25    0.15
   5 -11  -4    0.19    0.13
   5  11  -4    0.08    0.12
  -5  11   4    0.21    0.19
  -4 -11   4    4.26    0.19
   4 -11  -4    4.67    0.24
  -4 -11   4    4.32    0.26
   4 -11  -4    4.43    0.24
   4  11  -4    4.55    0.17
  -4  11   4    4.71    0.31
   4  11  -4    4.38    0.23
   3 -11  -4    0.67    0.12
   3 -11  -4    0.83    0.12
  -3 -11   4    0.74    0.08
  -3 -11   4    0.50    0.14
   3  11  -4    0.77    0.11
  -3  11   4    0.85    0.16
   3  11  -4    0.70    0.07
  -3  11   4    0.83    0.11
   2 -11  -4   14.39    0.41
   2 -11  -4   14.26    0.44
  -2 -11   4   13.81    0.37
  -2 -11   4   13.53    0.46
   2  11  -4   14.57    0.41
   2  11  -4   13.47    0.41
  -2  11   4   14.13    0.48
  -2  11   4   14.21    0.39
  -1 -11   4   17.87    0.46
   1 -11  -4   18.03    0.48
   1 -11  -4   18.48    0.54
  -1 -11   4   18.51    0.55
  -1  11   4   18.34    0.48
   1  11  -4   18.98    0.53
   1  11  -4   17.91    0.51
  -1  11   4   17.62    0.56
   0 -11  -4  114.68    2.96
   0 -11   4  115.14    2.69
   0 -11  -4  116.74    2.68
   0 -11   4  113.33    2.95
   0  11   4  117.44    3.06
   0  11   4  115.78    2.83
   0  11  -4  114.33    2.85
   0  11  -4  114.40    3.06
   1 -11   4    5.13    0.22
   1 -11   4    5.41    0.20
  -1 -11  -4    5.78    0.17
  -1 -11  -4    5.50    0.25
  -1  11  -4    5.74    0.23
  -1  11  -4    5.48    0.27
   1  11   4    5.50    0.21
   1  11   4    5.81    0.22
  -2 -11  -4    4.86    0.15
   2 -11   4    5.20    0.20
   2 -11   4    5.24    0.20
  -2 -11  -4    4.75    0.23
   2  11   4    5.03    0.20
  -2  11  -4    5.10    0.29
   2  11   4    5.00    0.22
  -2  11  -4    5.41    0.24
  -3 -11  -4    3.54    0.21
   3 -11   4    3.46    0.16
   3 -11   4    3.56    0.18
  -3  11  -4    3.40    0.24
   3  11   4    3.72    0.17
  -3  11  -4    3.44    0.28
   3  11   4    3.54    0.22
  -4 -11  -4    0.76    0.15
   4 -11   4    0.98    0.12
  -4  11  -4    0.99    0.18
   4  11   4    0.80    0.10
  -4  11  -4    0.85    0.20
   5 -11   4    3.37    0.21
  -5 -11  -4    3.99    0.24
  -5 -11  -4    3.87    0.30
   5  11   4    3.86    0.21
  -5  11  -4    3.82    0.30
  -5  11  -4    3.99    0.34
   6 -11   4   16.05    0.49
  -6 -11  -4   15.29    0.58
  -6 -11  -4   16.36    0.56
  -6  11  -4   15.34    0.65
  -6  11  -4   15.62    0.57
   6  11   4   16.93    0.52
   7 -11   4    2.95    0.23
  -7 -11  -4    3.06    0.30
  -7 -11  -4    2.80    0.25
  -7  11  -4    2.62    0.29
  -7  11  -4    3.00    0.35
   7  11   4    2.66    0.23
   8 -11   4    0.09    0.14
  -8 -11  -4    0.01    0.22
  -8 -11  -4    0.04    0.18
   8  11   4   -0.19    0.14
  -8  11  -4   -0.10    0.27
   9 -11   4   15.88    0.53
  -9 -11  -4   16.76    0.66
  -9 -11  -4   16.36    0.60
  -9  11  -4   16.04    0.76
  10 -11   4    0.01    0.17
 -10  11  -4   -0.19    0.33
  10 -12  -4    1.42    0.23
 -10 -12   4    1.73    0.28
  10  12  -4    2.05    0.24
 -10  12   4    1.66    0.39
   9 -12  -4    1.96    0.24
  -9 -12   4    1.74    0.27
  -9  12   4    2.47    0.37
   9  12  -4    1.92    0.22
   8 -12  -4    2.08    0.22
  -8 -12   4    2.08    0.26
   8  12  -4    2.27    0.22
  -8  12   4    1.67    0.32
  -7 -12   4    0.71    0.20
   7 -12  -4    0.43    0.16
   7  12  -4    0.42    0.15
  -7  12   4    0.58    0.26
  -6 -12   4    5.52    0.32
   6 -12  -4    5.70    0.29
   6  12  -4    5.73    0.29
  -6  12   4    5.49    0.39
   5 -12  -4    1.76    0.18
  -5 -12   4    1.66    0.20
   5 -12  -4    1.70    0.18
   5  12  -4    1.95    0.17
  -5  12   4    1.66    0.24
   4 -12  -4    8.06    0.32
  -4 -12   4    8.73    0.27
  -4 -12   4    8.39    0.36
   4 -12  -4    7.99    0.31
   4  12  -4    8.33    0.31
  -4  12   4    7.76    0.40
  -3 -12   4    6.37    0.30
   3 -12  -4    6.61    0.28
   3 -12  -4    6.73    0.26
  -3 -12   4    6.97    0.22
   3  12  -4    7.02    0.23
   3  12  -4    6.67    0.26
  -3  12   4    6.53    0.33
  -2 -12   4   13.93    0.38
   2 -12  -4   14.19    0.41
  -2 -12   4   14.32    0.47
   2 -12  -4   14.30    0.45
   2  12  -4   14.00    0.42
  -2  12   4   14.19    0.40
   2  12  -4   14.83    0.42
  -2  12   4   13.65    0.48
  -1 -12   4    3.80    0.22
   1 -12  -4    4.03    0.18
  -1 -12   4    3.97    0.16
   1 -12  -4    3.97    0.21
   1  12  -4    4.03    0.18
  -1  12   4    4.25    0.23
   1  12  -4    4.00    0.19
  -1  12   4    4.12    0.17
   0 -12   4    7.10    0.23
   0 -12  -4    6.98    0.29
   0 -12   4    7.57    0.29
   0 -12  -4    7.04    0.23
   0  12  -4    7.61    0.29
   0  12  -4    7.49    0.26
   0  12   4    6.97    0.27
   0  12   4    7.08    0.24
   1 -12   4    3.89    0.20
   1 -12   4    3.71    0.17
  -1 -12  -4    4.14    0.22
  -1 -12  -4    3.98    0.15
   1  12   4    4.18    0.19
   1  12   4    3.97    0.18
  -1  12  -4    3.60    0.20
  -1  12  -4    4.10    0.24
   2 -12   4    0.24    0.09
  -2 -12  -4    0.14    0.04
  -2 -12  -4    0.17    0.12
   2 -12   4    0.43    0.09
  -2  12  -4    0.20    0.14
   2  12   4    0.06    0.10
   2  12   4    0.26    0.08
  -2  12  -4    0.19    0.12
   3 -12   4    0.19    0.09
  -3 -12  -4   -0.08    0.12
   3 -12   4    0.14    0.10
   3  12   4    0.18    0.08
   3  12   4    0.04    0.11
  -3  12  -4    0.09    0.16
  -3  12  -4   -0.05    0.13
   4 -12   4    7.96    0.30
  -4 -12  -4    8.19    0.35
   4  12   4    8.59    0.34
   4  12   4    8.14    0.29
  -4  12  -4    8.47    0.42
  -4  12  -4    8.29    0.37
   5 -12   4    0.11    0.12
  -5 -12  -4   -0.05    0.15
   5  12   4    0.08    0.10
  -5  12  -4    0.01    0.18
  -5  12  -4    0.22    0.21
   5  12   4    0.15    0.15
   6 -12   4    0.81    0.15
  -6 -12  -4    0.58    0.19
   6  12   4    0.95    0.14
  -6  12  -4    0.95    0.26
  -6  12  -4    0.78    0.23
  -7 -12  -4   -0.03    0.17
   7 -12   4    0.14    0.14
  -7  12  -4   -0.16    0.25
   7  12   4   -0.07    0.13
  -8 -12  -4    0.89    0.22
   8 -12   4    0.92    0.17
   8  12   4    0.64    0.17
  -8  12  -4    0.79    0.30
   9 -12   4    1.89    0.22
  -9 -12  -4    2.29    0.27
  -9  12  -4    1.96    0.37
 -10 -12  -4    0.22    0.22
  10 -12   4    0.49    0.19
 -10  12  -4   -0.14    0.34
  10  12   4    0.28    0.22
  10 -13  -4    0.30    0.20
 -10 -13   4    0.46    0.24
  10  13  -4    0.02    0.19
 -10  13   4    0.60    0.36
  -9 -13   4    0.71    0.23
   9 -13  -4    0.54    0.20
  -9  13   4    0.74    0.32
   9  13  -4    0.59    0.19
  -8 -13   4    2.99    0.30
   8 -13  -4    2.55    0.24
  -8  13   4    2.60    0.36
   8  13  -4    3.06    0.26
  -7 -13   4    0.18    0.19
   7 -13  -4   -0.01    0.15
   7  13  -4    0.01    0.14
  -7  13   4   -0.32    0.24
   6 -13  -4    1.59    0.19
  -6 -13   4    1.74    0.22
  -6  13   4    1.91    0.28
   6  13  -4    2.05    0.19
   5 -13  -4    3.90    0.25
  -5 -13   4    3.79    0.28
  -5  13   4    4.19    0.35
   5  13  -4    3.71    0.24
   4 -13  -4    9.46    0.34
   4 -13  -4    9.42    0.35
  -4 -13   4    9.02    0.38
  -4  13   4    8.82    0.42
   4  13  -4    8.98    0.33
   3 -13  -4    0.14    0.13
   3 -13  -4   -0.02    0.11
  -3 -13   4    0.18    0.13
  -3 -13   4    0.04    0.07
   3  13  -4   -0.03    0.10
  -3  13   4   -0.05    0.15
   3  13  -4    0.21    0.08
   2 -13  -4   15.28    0.49
  -2 -13   4   15.93    0.41
   2 -13  -4   15.94    0.45
  -2 -13   4   15.64    0.51
  -2  13   4   15.04    0.52
   2  13  -4   16.19    0.47
   2  13  -4   15.86    0.46
   1 -13  -4    0.22    0.13
  -1 -13   4   -0.05    0.12
  -1 -13   4    0.14    0.07
   1 -13  -4   -0.01    0.08
  -1  13   4   -0.02    0.08
   1  13  -4    0.22    0.10
  -1  13   4    0.10    0.12
   1  13  -4    0.01    0.09
   0 -13  -4    4.36    0.23
   0 -13  -4    4.32    0.17
   0 -13   4    4.10    0.17
   0 -13   4    4.12    0.23
   0  13  -4    4.34    0.23
   0  13   4    4.18    0.22
   0  13   4    4.19    0.18
   0  13  -4    4.14    0.20
  -1 -13  -4    0.04    0.12
   1 -13   4    0.08    0.11
   1 -13   4    0.00    0.08
  -1 -13  -4    0.01    0.06
   1  13   4    0.11    0.09
   1  13   4    0.12    0.09
  -1  13  -4   -0.10    0.12
  -1  13  -4    0.01    0.10
  -2 -13  -4    2.06    0.19
   2 -13   4    2.00    0.16
   2 -13   4    1.92    0.15
   2  13   4    2.09    0.17
  -2  13  -4    1.76    0.16
  -2  13  -4    1.91    0.20
   2  13   4    1.91    0.15
  -3 -13  -4    0.24    0.14
   3 -13   4    0.47    0.11
  -3  13  -4    0.22    0.15
   3  13   4    0.37    0.10
   3  13   4    0.45    0.13
  -3  13  -4    0.07    0.17
   4 -13   4    0.94    0.13
  -4 -13  -4    0.87    0.17
   4  13   4    0.90    0.12
  -4  13  -4    1.08    0.22
   4  13   4    1.14    0.16
  -4  13  -4    1.17    0.19
  -5 -13  -4    2.57    0.24
   5 -13   4    2.50    0.19
   5  13   4    2.45    0.21
  -5  13  -4    2.76    0.30
   5  13   4    2.23    0.19
  -5  13  -4    2.72    0.25
  -6 -13  -4    7.56    0.38
   6 -13   4    7.90    0.33
   6  13   4    7.64    0.36
  -6  13  -4    8.61    0.42
  -6  13  -4    7.39    0.48
   6  13   4    8.38    0.32
   7 -13   4    0.25    0.15
  -7 -13  -4    0.14    0.19
  -7  13  -4    0.07    0.26
   7  13   4    0.07    0.17
   7  13   4    0.20    0.13
   8 -13   4    4.19    0.28
  -8 -13  -4    4.52    0.33
  -8  13  -4    4.62    0.44
   8  13   4    4.52    0.31
  -9 -13  -4    1.82    0.27
   9 -13   4    2.04    0.22
  -9  13  -4    2.03    0.38
   9  13   4    1.58    0.25
  10 -13   4    0.73    0.20
 -10 -13  -4    0.20    0.24
 -10 -14   4    0.27    0.24
  -9 -14   4    0.55    0.24
   9 -14  -4    0.59    0.20
   9  14  -4    0.47    0.19
  -9  14   4    0.79    0.34
  -8 -14   4    0.27    0.21
   8 -14  -4    0.13    0.17
   8  14  -4    0.05    0.16
  -8  14   4    0.60    0.30
  -7 -14   4    1.66    0.24
   7 -14  -4    1.46    0.20
  -7  14   4    1.76    0.31
   7  14  -4    1.54    0.19
   6 -14  -4    1.46    0.18
  -6 -14   4    1.46    0.23
   6  14  -4    1.46    0.18
  -6  14   4    1.14    0.27
   5 -14  -4    2.31    0.21
  -5 -14   4    2.59    0.25
   5  14  -4    2.56    0.21
  -5  14   4    2.63    0.29
   4 -14  -4    0.06    0.12
   4 -14  -4   -0.11    0.14
  -4 -14   4    0.10    0.16
   4  14  -4    0.08    0.12
  -4  14   4   -0.07    0.19
  -3 -14   4    0.07    0.07
  -3 -14   4    0.17    0.15
   3 -14  -4    0.04    0.11
   3 -14  -4    0.01    0.13
   3  14  -4   -0.16    0.10
  -3  14   4   -0.23    0.15
   2 -14  -4    1.58    0.16
  -2 -14   4    1.49    0.18
   2 -14  -4    1.56    0.14
  -2 -14   4    1.43    0.10
   2  14  -4    1.80    0.15
   2  14  -4    1.26    0.13
  -2  14   4    1.48    0.13
  -2  14   4    1.25    0.18
   1 -14  -4    2.22    0.20
  -1 -14   4    2.54    0.14
  -1 -14   4    2.72    0.21
   1 -14  -4    2.42    0.16
  -1  14   4    2.40    0.15
   1  14  -4    2.72    0.19
  -1  14   4    2.50    0.22
   1  14  -4    2.64    0.17
   0 -14   4   12.59    0.35
   0 -14  -4   12.15    0.42
   0 -14   4   12.35    0.41
   0 -14  -4   12.21    0.35
   0  14   4   11.73    0.42
   0  14  -4   12.55    0.39
   0  14   4   12.14    0.36
   0  14  -4   13.06    0.43
  -1 -14  -4    6.74    0.21
   1 -14   4    6.65    0.24
   1 -14   4    6.63    0.28
  -1 -14  -4    6.71    0.30
   1  14   4    6.64    0.25
   1  14   4    6.79    0.27
  -1  14  -4    6.57    0.27
  -1  14  -4    6.24    0.31
   2 -14   4    0.75    0.11
   2 -14   4    0.71    0.12
  -2 -14  -4    0.78    0.16
   2  14   4    0.77    0.12
   2  14   4    0.80    0.12
  -2  14  -4    0.70    0.17
  -2  14  -4    0.70    0.15
  -3 -14  -4    0.44    0.14
   3 -14   4    0.10    0.11
   3  14   4    0.17    0.10
  -3  14  -4    0.27    0.16
  -3  14  -4    0.21    0.18
   3  14   4    0.16    0.12
  -4 -14  -4    0.12    0.16
   4 -14   4    0.30    0.12
  -4  14  -4    0.13    0.18
   4  14   4    0.09    0.10
   4  14   4    0.13    0.14
  -4  14  -4    0.15    0.20
   5 -14   4    5.30    0.26
  -5 -14  -4    5.07    0.32
  -5  14  -4    5.66    0.41
   5  14   4    5.93    0.25
   5  14   4    5.40    0.30
  -5  14  -4    5.42    0.35
  -6 -14  -4    0.88    0.20
   6 -14   4    0.67    0.15
  -6  14  -4    0.69    0.27
   6  14   4    0.61    0.18
   6  14   4    0.67    0.14
  -7 -14  -4    2.13    0.25
   7 -14   4    1.95    0.20
   7  14   4    2.01    0.23
   7  14   4    1.84    0.18
  -7  14  -4    1.91    0.33
   8 -14   4    1.56    0.20
  -8 -14  -4    1.51    0.26
  -8  14  -4    1.80    0.36
   8  14   4    2.24    0.25
   9 -14   4    1.33    0.21
  -9 -14  -4    1.64    0.28
  -9  14  -4    1.35    0.37
   9  14   4    1.39    0.24
 -10 -14  -4    0.54    0.25
  -9 -15   4    1.30    0.27
   9 -15  -4    0.91    0.22
   9  15  -4    0.92    0.21
  -9  15   4    0.92    0.35
   8 -15  -4    6.73    0.35
  -8 -15   4    7.07    0.41
   8  15  -4    7.19    0.35
  -8  15   4    7.44    0.52
   7 -15  -4    0.65    0.18
  -7 -15   4    0.62    0.22
  -7  15   4    0.36    0.27
   7  15  -4    0.59    0.17
   6 -15  -4    0.53    0.16
  -6 -15   4    0.74    0.21
   6  15  -4    0.55    0.15
  -6  15   4    0.49    0.25
  -5 -15   4    0.24    0.18
   5 -15  -4    0.02    0.14
  -5  15   4    0.56    0.23
   5  15  -4    0.02    0.13
   4 -15  -4    2.06    0.20
   4 -15  -4    1.67    0.17
  -4 -15   4    1.77    0.22
  -4  15   4    1.63    0.25
   4  15  -4    1.66    0.16
  -3 -15   4    0.13    0.15
   3 -15  -4   -0.11    0.11
   3 -15  -4    0.06    0.14
  -3  15   4    0.03    0.18
   3  15  -4   -0.06    0.11
  -2 -15   4    2.55    0.14
  -2 -15   4    2.85    0.23
   2 -15  -4    2.58    0.19
   2 -15  -4    2.74    0.22
  -2  15   4    2.73    0.23
   2  15  -4    2.65    0.19
   2  15  -4    2.85    0.20
   1 -15  -4    0.23    0.10
   1 -15  -4    0.17    0.14
  -1 -15   4    0.13    0.14
  -1 -15   4    0.14    0.08
  -1  15   4    0.16    0.14
  -1  15   4    0.11    0.10
   1  15  -4    0.21    0.11
   1  15  -4    0.10    0.11
   0 -15  -4    0.46    0.14
   0 -15   4    0.18    0.08
   0 -15   4    0.12    0.12
   0 -15  -4    0.35    0.09
   0  15   4    0.43    0.13
   0  15   4    0.19    0.09
   0  15  -4    0.26    0.12
   0  15  -4    0.39    0.14
   1 -15   4    0.18    0.09
  -1 -15  -4    0.32    0.15
   1 -15   4   -0.01    0.12
   1  15   4    0.09    0.11
  -1  15  -4    0.13    0.12
   1  15   4   -0.09    0.09
  -1  15  -4    0.03    0.14
   2 -15   4    7.25    0.26
  -2 -15  -4    7.38    0.33
   2 -15   4    7.30    0.29
   2  15   4    6.70    0.28
  -2  15  -4    7.36    0.37
   2  15   4    7.53    0.29
  -2  15  -4    7.11    0.31
  -3 -15  -4    0.57    0.17
   3 -15   4    0.76    0.13
   3  15   4    0.89    0.12
  -3  15  -4    0.66    0.18
  -3  15  -4    0.75    0.21
   3  15   4    0.81    0.14
  -4 -15  -4   11.86    0.46
   4 -15   4   11.66    0.39
  -4  15  -4   11.40    0.52
  -4  15  -4   11.40    0.45
   4  15   4   12.27    0.39
   4  15   4   12.05    0.42
   5 -15   4    5.61    0.27
  -5 -15  -4    5.17    0.32
  -5  15  -4    5.15    0.41
   5  15   4    5.29    0.30
   5  15   4    5.39    0.25
  -5  15  -4    5.64    0.35
   6 -15   4    5.43    0.27
  -6 -15  -4    4.81    0.32
  -6  15  -4    5.14    0.42
   6  15   4    4.69    0.30
   6  15   4    5.04    0.25
   7 -15   4    0.32    0.16
  -7 -15  -4   -0.07    0.20
  -7  15  -4    0.20    0.28
   7  15   4   -0.09    0.17
  -8 -15  -4   -0.17    0.20
   8 -15   4    0.15    0.16
  -8  15  -4    0.19    0.30
   8  15   4   -0.13    0.18
  -9 -15  -4    0.63    0.25
   9 -15   4    1.20    0.20
   9  15   4    0.83    0.23
  -9  15  -4    0.77    0.36
 -10 -15  -4    0.22    0.24
   9 -16  -4    0.41    0.20
  -9 -16   4    0.05    0.23
  -9  16   4    0.32    0.34
   9  16  -4    0.05    0.18
  -8 -16   4    0.20    0.22
   8 -16  -4    0.07    0.18
  -8  16   4   -0.13    0.29
   8  16  -4    0.02    0.17
  -7 -16   4    3.96    0.33
   7 -16  -4    4.06    0.29
   7  16  -4    4.40    0.28
  -7  16   4    4.68    0.43
  -6 -16   4    0.02    0.19
   6 -16  -4   -0.18    0.14
   6  16  -4    0.11    0.14
  -6  16   4    0.14    0.24
   5 -16  -4    1.25    0.17
  -5 -16   4    1.52    0.21
   5  16  -4    1.14    0.17
  -5  16   4    1.24    0.26
   4 -16  -4    0.25    0.13
  -4 -16   4    0.14    0.17
   4  16  -4    0.07    0.12
  -4  16   4    0.11    0.21
   3 -16  -4   14.26    0.45
   3 -16  -4   14.44    0.49
  -3 -16   4   14.72    0.53
   3  16  -4   14.79    0.46
  -3  16   4   14.39    0.55
   2 -16  -4    3.90    0.26
  -2 -16   4    4.19    0.18
   2 -16  -4    3.84    0.22
  -2 -16   4    3.84    0.26
   2  16  -4    3.91    0.22
  -2  16   4    3.69    0.29
  -1 -16   4    7.51    0.25
   1 -16  -4    8.08    0.28
  -1 -16   4    7.29    0.33
   1 -16  -4    7.76    0.33
   1  16  -4    8.27    0.32
  -1  16   4    8.37    0.35
  -1  16   4    7.66    0.28
   1  16  -4    7.23    0.29
   0 -16   4    1.92    0.20
   0 -16  -4    2.17    0.20
   0 -16  -4    2.28    0.14
   0 -16   4    1.78    0.15
   0  16   4    2.04    0.16
   0  16  -4    2.06    0.19
   0  16   4    2.25    0.21
   0  16  -4    1.81    0.17
  -1 -16  -4    0.52    0.17
   1 -16   4    0.47    0.11
   1 -16   4    0.71    0.15
   1  16   4    0.45    0.13
  -1  16  -4    0.31    0.16
   1  16   4    0.41    0.11
  -1  16  -4    0.43    0.14
   2 -16   4   27.73    0.79
   2 -16   4   27.75    0.73
  -2 -16  -4   27.69    0.84
   2  16   4   28.35    0.77
  -2  16  -4   27.16    0.79
   2  16   4   28.83    0.81
  -2  16  -4   28.11    0.88
  -3 -16  -4    6.64    0.34
   3 -16   4    6.66    0.27
  -3  16  -4    6.37    0.34
  -3  16  -4    6.79    0.39
   3  16   4    6.44    0.29
   3  16   4    6.68    0.27
   4 -16   4    3.02    0.22
  -4 -16  -4    2.51    0.24
  -4  16  -4    2.48    0.29
  -4  16  -4    2.30    0.24
   4  16   4    3.10    0.20
   4  16   4    2.77    0.23
   5 -16   4    0.76    0.15
  -5 -16  -4    0.78    0.21
  -5  16  -4    0.91    0.27
   5  16   4    0.49    0.17
   5  16   4    0.67    0.14
   6 -16   4    0.38    0.15
  -6 -16  -4    0.25    0.20
   6  16   4    0.18    0.17
  -6  16  -4    0.43    0.27
  -7 -16  -4    1.00    0.24
   7 -16   4    1.13    0.19
  -7  16  -4    0.99    0.32
   7  16   4    1.22    0.21
  -8 -16  -4   -0.12    0.22
   8 -16   4    0.17    0.17
  -8  16  -4    0.41    0.32
   8  16   4   -0.35    0.18
  -9 -16  -4    0.41    0.25
   9 -16   4    0.31    0.19
  -9  16  -4   -0.02    0.34
   9  16   4    0.40    0.21
   8 -17  -4    0.41    0.19
  -8 -17   4    0.22    0.23
  -8  17   4    0.55    0.32
   8  17  -4    0.55    0.19
   7 -17  -4   -0.04    0.17
  -7 -17   4    0.26    0.20
   7  17  -4    0.13    0.16
  -7  17   4    0.33    0.29
  -6 -17   4    3.42    0.31
   6 -17  -4    3.57    0.26
  -6  17   4    3.80    0.38
   6  17  -4    3.93    0.26
   5 -17  -4    0.33    0.15
  -5 -17   4    0.18    0.20
   5  17  -4    0.08    0.14
  -5  17   4    0.24    0.23
  -4 -17   4   13.05    0.51
   4 -17  -4   13.36    0.44
  -4  17   4   12.80    0.56
   4  17  -4   13.62    0.45
  -3 -17   4   -0.12    0.16
   3 -17  -4   -0.03    0.12
   3 -17  -4    0.11    0.14
  -3  17   4   -0.18    0.19
   3  17  -4   -0.05    0.12
  -2 -17   4    5.88    0.31
   2 -17  -4    5.72    0.29
   2 -17  -4    5.61    0.25
   2  17  -4    5.59    0.26
  -2  17   4    5.22    0.33
   1 -17  -4    0.02    0.15
  -1 -17   4    0.07    0.15
  -1 -17   4    0.01    0.09
   1 -17  -4   -0.28    0.09
   1  17  -4    0.29    0.12
  -1  17   4    0.12    0.16
   0 -17  -4    2.40    0.16
   0 -17   4    2.31    0.21
   0 -17   4    2.26    0.16
   0 -17  -4    2.61    0.22
   0  17  -4    2.51    0.21
   0  17  -4    2.36    0.20
   0  17   4    2.26    0.17
   0  17   4    2.51    0.23
   1 -17   4    3.79    0.25
   1 -17   4    3.79    0.20
  -1 -17  -4    3.93    0.25
  -1  17  -4    4.14    0.30
  -1  17  -4    3.60    0.24
   1  17   4    4.13    0.21
   1  17   4    4.00    0.24
   2 -17   4    0.85    0.13
  -2 -17  -4    0.98    0.19
   2  17   4    0.87    0.14
  -2  17  -4    0.77    0.17
  -2  17  -4    1.15    0.21
   2  17   4    0.93    0.15
  -3 -17  -4    0.34    0.18
   3 -17   4    0.12    0.12
   3  17   4    0.19    0.14
  -3  17  -4    0.31    0.21
   3  17   4    0.44    0.13
  -3  17  -4    0.31    0.19
  -4 -17  -4   -0.16    0.17
   4 -17   4    0.31    0.13
  -4  17  -4    0.06    0.19
   4  17   4    0.07    0.12
   4  17   4    0.06    0.14
  -4  17  -4   -0.01    0.22
  -5 -17  -4    0.79    0.21
   5 -17   4    0.53    0.15
  -5  17  -4    0.68    0.26
   5  17   4    0.41    0.17
   5  17   4    0.62    0.14
   6 -17   4    7.00    0.32
  -6 -17  -4    8.22    0.41
  -6  17  -4    6.38    0.48
   6  17   4    8.06    0.37
   7 -17   4    4.20    0.28
  -7 -17  -4    4.68    0.35
   7  17   4    4.68    0.32
  -7  17  -4    4.14    0.43
   8 -17   4    2.87    0.25
  -8 -17  -4    2.52    0.31
   8  17   4    2.85    0.28
  -8  17  -4    2.22    0.40
  -9 -17  -4    5.44    0.40
  -8 -18   4    1.98    0.30
   8 -18  -4    1.88    0.24
   8  18  -4    2.31    0.25
  -8  18   4    2.47    0.40
   7 -18  -4    0.23    0.18
  -7 -18   4    0.16    0.23
   7  18  -4    0.04    0.16
  -7  18   4    0.55    0.30
   6 -18  -4    0.77    0.18
  -6 -18   4    0.88    0.23
  -6  18   4    1.20    0.30
   6  18  -4    0.56    0.17
  -5 -18   4    5.45    0.35
   5 -18  -4    5.29    0.29
  -5  18   4    6.15    0.42
   5  18  -4    5.59    0.29
   4 -18  -4    0.80    0.16
  -4 -18   4    1.01    0.21
  -4  18   4    0.76    0.25
   4  18  -4    0.93    0.16
   3 -18  -4    6.24    0.31
   3 -18  -4    5.28    0.27
  -3 -18   4    5.84    0.34
   3  18  -4    5.65    0.28
  -3  18   4    5.62    0.37
   2 -18  -4    0.22    0.12
   2 -18  -4    0.33    0.16
  -2 -18   4   -0.06    0.16
   2  18  -4    0.25    0.13
  -2  18   4    0.19    0.19
  -1 -18   4   -0.09    0.15
   1 -18  -4   -0.10    0.15
  -1 -18   4   -0.20    0.09
   1 -18  -4   -0.02    0.10
  -1  18   4   -0.02    0.17
   1  18  -4   -0.01    0.13
   0 -18   4    1.77    0.14
   0 -18  -4    2.12    0.22
   0 -18   4    1.86    0.20
   0  18   4    2.30    0.21
   0  18   4    1.97    0.16
   0  18  -4    1.79    0.18
   0  18  -4    2.17    0.21
   1 -18   4    2.72    0.18
  -1 -18  -4    2.80    0.25
   1 -18   4    3.04    0.24
   1  18   4    3.36    0.24
  -1  18  -4    3.10    0.29
   1  18   4    2.90    0.20
  -1  18  -4    2.46    0.21
  -2 -18  -4    3.34    0.27
   2 -18   4    3.04    0.20
  -2  18  -4    3.62    0.32
   2  18   4    3.34    0.22
  -2  18  -4    3.44    0.26
   2  18   4    3.63    0.23
  -3 -18  -4    2.63    0.24
   3 -18   4    2.45    0.19
  -3  18  -4    2.29    0.27
   3  18   4    2.38    0.21
   3  18   4    2.39    0.20
  -3  18  -4    2.26    0.24
   4 -18   4    0.82    0.15
  -4 -18  -4    1.01    0.22
   4  18   4    1.26    0.18
  -4  18  -4    1.29    0.26
   4  18   4    0.81    0.15
  -5 -18  -4    0.45    0.21
   5 -18   4    0.48    0.15
  -5  18  -4    0.59    0.26
   5  18   4    0.58    0.17
  -6 -18  -4    1.47    0.25
   6 -18   4    1.54    0.19
  -6  18  -4    1.69    0.32
   6  18   4    1.35    0.21
   7 -18   4    2.41    0.23
  -7 -18  -4    3.21    0.32
   7  18   4    3.44    0.29
  -7  18  -4    3.09    0.40
  -8 -18  -4    0.63    0.25
   8 -18   4    0.38    0.18
   8  18   4    0.18    0.20
  -8  18  -4    0.45    0.35
   7 -19  -4    0.89    0.20
  -7 -19   4    1.07    0.26
  -7  19   4    0.90    0.33
   7  19  -4    0.64    0.19
  -6 -19   4    0.03    0.21
   6 -19  -4    0.10    0.16
  -6  19   4    0.24    0.28
   6  19  -4    0.11    0.16
  -5 -19   4    4.68    0.34
   5 -19  -4    4.49    0.28
   5  19  -4    4.62    0.28
  -5  19   4    4.65    0.41
   4 -19  -4    0.48    0.15
  -4 -19   4    0.75    0.22
  -4  19   4    0.76    0.25
   4  19  -4    0.65    0.16
   3 -19  -4    1.62    0.17
  -3 -19   4    1.96    0.24
  -3  19   4    2.04    0.26
   3  19  -4    1.87    0.18
   2 -19  -4    1.59    0.20
   2 -19  -4    1.64    0.16
  -2 -19   4    1.50    0.22
  -2  19   4    1.51    0.24
   2  19  -4    1.62    0.17
  -1 -19   4    3.12    0.18
   1 -19  -4    3.32    0.27
  -1 -19   4    3.51    0.27
   1 -19  -4    3.07    0.19
  -1  19   4    2.99    0.28
   1  19  -4    2.84    0.22
   0 -19  -4    7.59    0.37
   0 -19   4    7.51    0.36
   0 -19   4    7.01    0.27
   0  19   4    7.50    0.35
   0  19  -4    6.57    0.31
  -1 -19  -4    0.88    0.20
   1 -19   4    0.98    0.18
   1 -19   4    0.81    0.13
  -1  19  -4    0.51    0.20
   1  19   4    0.42    0.13
  -1  19  -4    0.66    0.17
   1  19   4    0.99    0.17
   2 -19   4    1.05    0.14
  -2 -19  -4    0.99    0.21
   2  19   4    1.36    0.17
  -2  19  -4    1.64    0.24
   2  19   4    1.25    0.15
  -2  19  -4    1.42    0.20
   3 -19   4    1.89    0.17
  -3 -19  -4    1.94    0.24
   3  19   4    1.66    0.18
   3  19   4    1.96    0.18
  -3  19  -4    1.61    0.23
  -3  19  -4    1.65    0.26
  -4 -19  -4    2.12    0.26
   4 -19   4    1.56    0.18
   4  19   4    1.96    0.18
   4  19   4    2.01    0.20
  -4  19  -4    1.98    0.29
  -5 -19  -4    6.02    0.36
   5 -19   4    4.86    0.28
   5  19   4    5.47    0.30
  -5  19  -4    5.66    0.44
  -6 -19  -4    0.05    0.22
   6 -19   4    0.03    0.15
  -6  19  -4    0.05    0.28
   6  19   4    0.05    0.17
  -7 -19  -4    0.05    0.23
   7 -19   4   -0.20    0.16
   7  19   4   -0.03    0.18
  -7  19  -4   -0.21    0.30
  -8 -19  -4   -0.13    0.24
  -8  19  -4   -0.30    0.33
  -7 -20   4    2.07    0.30
   7 -20  -4    1.79    0.23
   7  20  -4    1.78    0.23
  -7  20   4    2.01    0.37
  -6 -20   4    1.06    0.26
   6 -20  -4    1.34    0.20
   6  20  -4    1.04    0.20
  -6  20   4    1.35    0.33
   5 -20  -4    0.15    0.15
  -5 -20   4   -0.17    0.20
   5  20  -4   -0.08    0.15
  -5  20   4    0.04    0.26
  -4 -20   4    1.71    0.25
   4 -20  -4    1.45    0.18
   4  20  -4    1.12    0.18
  -4  20   4    1.20    0.27
  -3 -20   4   -0.08    0.19
   3 -20  -4    0.15    0.13
   3  20  -4    0.17    0.14
  -3  20   4    0.47    0.23
   2 -20  -4    2.20    0.22
  -2 -20   4    2.01    0.25
   2 -20  -4    1.81    0.17
   2  20  -4    1.58    0.18
  -2  20   4    2.58    0.27
   1 -20  -4    0.91    0.20
  -1 -20   4    0.78    0.21
   1  20  -4    0.79    0.16
  -1  20   4    1.12    0.21
   0 -20  -4    1.65    0.22
   0 -20   4    1.72    0.15
   0 -20   4    1.95    0.22
   0  20  -4    1.40    0.19
   0  20   4    1.83    0.22
  -1 -20  -4    1.01    0.21
   1 -20   4    0.79    0.14
   1  20   4    0.76    0.14
  -1  20  -4    0.69    0.18
   1  20   4    1.19    0.18
  -1  20  -4    1.06    0.21
  -2 -20  -4    2.29    0.26
   2 -20   4    2.59    0.19
   2  20   4    2.47    0.21
  -2  20  -4    2.57    0.24
   2  20   4    2.57    0.23
  -2  20  -4    2.71    0.28
   3 -20   4    0.36    0.14
  -3 -20  -4    0.57    0.21
   3  20   4    0.62    0.16
   3  20   4    0.40    0.15
  -3  20  -4    0.39    0.23
   4 -20   4    0.43    0.15
  -4 -20  -4    0.19    0.19
  -4  20  -4    0.67    0.26
   4  20   4    0.18    0.15
   5 -20   4    0.22    0.15
  -5 -20  -4    0.05    0.21
  -5  20  -4    0.05    0.26
   5  20   4   -0.12    0.16
  -6 -20  -4    0.18    0.24
   6 -20   4   -0.01    0.16
   6  20   4    0.36    0.18
  -6  20  -4    0.10    0.30
   7 -20   4    0.13    0.18
  -7 -20  -4    0.59    0.26
   7  20   4    0.20    0.20
  -7  20  -4    0.60    0.34
   7 -21  -4    0.10    0.19
  -6 -21   4    0.28    0.24
   6 -21  -4    0.06    0.17
  -6  21   4    0.08    0.29
   6  21  -4    0.06    0.17
   5 -21  -4    2.49    0.22
  -5 -21   4    1.86    0.29
   5  21  -4    2.04    0.22
  -5  21   4    2.50    0.34
   4 -21  -4    0.39    0.16
  -4 -21   4    0.04    0.21
  -4  21   4    0.24    0.25
   4  21  -4    0.04    0.15
   3 -21  -4    0.21    0.14
  -3 -21   4    0.28    0.21
  -3  21   4   -0.03    0.22
   3  21  -4    0.18    0.15
  -2 -21   4    0.31    0.19
   2 -21  -4    0.37    0.19
   2 -21  -4    0.54    0.13
  -2  21   4    0.47    0.22
   2  21  -4    0.20    0.15
  -1 -21   4    0.84    0.21
   1 -21  -4    1.41    0.21
  -1  21   4    1.34    0.23
   1  21  -4    0.82    0.17
   0 -21  -4    0.65    0.20
   0 -21   4    0.45    0.12
   0 -21   4    0.48    0.18
   0  21  -4    0.63    0.17
   0  21   4    0.55    0.19
   1 -21   4   -0.04    0.12
  -1 -21  -4    0.39    0.20
   1  21   4    0.47    0.18
  -1  21  -4    0.19    0.18
  -2 -21  -4    0.08    0.20
   2 -21   4   -0.06    0.12
   2  21   4    0.12    0.14
   2  21   4    0.41    0.17
  -2  21  -4   -0.04    0.21
  -2  21  -4    0.00    0.19
   3 -21   4    1.15    0.16
  -3 -21  -4    1.72    0.26
  -3  21  -4    1.50    0.28
   3  21   4    1.43    0.18
   4 -21   4    0.84    0.16
  -4 -21  -4    0.59    0.23
  -4  21  -4    1.25    0.28
   4  21   4    0.71    0.17
   5 -21   4    1.07    0.18
  -5 -21  -4    1.20    0.26
   5  21   4    1.41    0.21
  -5  21  -4    1.21    0.31
  -6 -21  -4    0.35    0.25
   6 -21   4    0.18    0.17
  -6  21  -4    0.23    0.31
   6  21   4    0.00    0.18
  -7  21  -4    0.69    0.36
   7  21   4    0.31    0.20
   6 -22  -4    1.33    0.21
  -6 -22   4    1.27    0.29
  -6  22   4    1.39    0.35
   6  22  -4    0.82    0.20
   5 -22  -4    0.45    0.17
  -5 -22   4    0.22    0.23
  -5  22   4    0.78    0.30
   5  22  -4    0.29    0.18
   4 -22  -4    0.69    0.17
  -4 -22   4    0.67    0.24
  -4  22   4    0.26    0.25
   4  22  -4    0.51    0.17
   3 -22  -4    2.27    0.20
  -3 -22   4    2.75    0.29
   3  22  -4    2.43    0.21
  -3  22   4    2.70    0.32
  -2 -22   4    0.69    0.22
   2 -22  -4    0.85    0.20
  -2  22   4    1.16    0.25
   2  22  -4    0.66    0.17
   1 -22  -4    4.92    0.31
  -1 -22   4    4.87    0.34
  -1  22   4    4.22    0.34
   1  22  -4    3.44    0.26
   0 -22   4    1.74    0.24
   0 -22  -4    2.05    0.25
   0  22  -4    1.44    0.20
   0  22   4    2.46    0.26
  -1 -22  -4    0.12    0.20
   1 -22   4    0.15    0.12
  -1  22  -4   -0.14    0.18
   1  22   4    0.14    0.18
   2 -22   4    6.15    0.28
  -2 -22  -4    6.11    0.37
   2  22   4    5.80    0.29
  -3 -22  -4    2.17    0.28
   3 -22   4    2.15    0.19
   3  22   4    2.06    0.20
  -3  22  -4    2.54    0.31
   4 -22   4    0.76    0.17
  -4 -22  -4    1.02    0.26
   4  22   4    0.96    0.18
  -4  22  -4    1.10    0.29
   5 -22   4    1.94    0.21
  -5 -22  -4    2.15    0.30
   5  22   4    1.77    0.22
  -5  22  -4    1.78    0.34
  -6 -22  -4    1.12    0.29
   6 -22   4    1.18    0.20
  -6  22  -4    1.12    0.35
   6  22   4    1.18    0.22
   6 -23  -4    3.74    0.30
   5 -23  -4    0.24    0.17
  -5 -23   4    0.39    0.25
  -5  23   4    0.61    0.30
   5  23  -4   -0.04    0.18
  -4 -23   4    1.31    0.27
   4 -23  -4    1.17    0.19
  -4  23   4    1.15    0.29
   4  23  -4    0.91    0.19
   3 -23  -4    0.45    0.15
  -3 -23   4    0.37    0.23
   3  23  -4    0.40    0.17
  -3  23   4    1.22    0.27
  -2 -23   4    4.75    0.34
  -2  23   4    4.95    0.38
   2  23  -4    3.92    0.28
  -1 -23   4    1.20    0.23
   1 -23  -4    1.32    0.24
   1  23  -4    0.91    0.20
  -1  23   4    1.44    0.25
   0 -23  -4    3.78    0.31
   0  23   4    4.06    0.32
   0  23  -4    2.79    0.25
  -1 -23  -4    0.95    0.23
   1  23   4    1.41    0.23
   2 -23   4    0.44    0.15
  -2 -23  -4    1.04    0.24
   3 -23   4    0.87    0.17
  -3 -23  -4    1.41    0.27
   3  23   4    0.92    0.18
  -4 -23  -4    0.36    0.24
   4 -23   4   -0.06    0.15
   4  23   4   -0.13    0.16
  -4  23  -4    0.18    0.27
  -5 -23  -4    0.40    0.26
   5 -23   4    0.18    0.17
  -5  23  -4    0.70    0.31
   5  23   4   -0.09    0.17
  -6  23  -4    3.16    0.42
   5 -24  -4    0.15    0.18
  -5  24   4    0.26    0.30
   4 -24  -4   -0.07    0.16
  -4 -24   4    0.09    0.24
   4  24  -4    0.04    0.17
  -4  24   4    0.43    0.28
  -3 -24   4    0.95    0.25
   3  24  -4    0.85    0.19
  -3  24   4    0.87    0.28
  -2 -24   4    0.49    0.23
  -2  24   4    0.35    0.24
   2  24  -4    0.16    0.18
   1 -24  -4    0.68    0.22
  -1 -24   4    0.41    0.21
  -1  24   4    0.50    0.23
   1  24  -4    0.44    0.19
   0 -24  -4    0.88    0.24
   0  24  -4    0.72    0.20
   0  24   4    1.64    0.25
  -1 -24  -4    1.02    0.25
  -2 -24  -4    1.27    0.26
   2 -24   4    0.74    0.16
   3 -24   4    2.20    0.21
  -3 -24  -4    2.87    0.32
   4 -24   4    0.21    0.16
  -4 -24  -4    0.44    0.26
   4  24   4    0.21    0.18
   5 -24   4    2.48    0.24
  -5  24  -4    2.73    0.39
   5  24   4    2.14    0.25
  -4 -25   4   -0.33    0.24
  -4  25   4    0.43    0.30
   4  25  -4   -0.23    0.18
  -3 -25   4    2.76    0.31
   3  25  -4    1.87    0.23
  -3  25   4    2.05    0.33
  -2 -25   4   -0.07    0.22
  -2  25   4    0.55    0.27
   2  25  -4    0.00    0.19
  -1 -25   4    0.35    0.23
   1  25  -4    0.57    0.20
  -1  25   4    0.51    0.25
   0 -25  -4    2.19    0.28
  -1 -25  -4   -0.08    0.22
  -2 -25  -4    0.19    0.23
   3 -25   4    0.17    0.16
  -3 -25  -4    0.63    0.26
   4 -25   4    0.37    0.17
   4  25   4    0.44    0.19
  -3 -26   4    0.07    0.24
   3  26  -4   -0.36    0.19
  -3  26   4    0.19    0.28
  -2 -26   4    0.89    0.26
  -2  26   4    0.96    0.29
   2  26  -4    0.65    0.22
   0 -26  -4    0.58    0.24
  -1 -26  -4    0.64    0.27
  -2 -26  -4    1.39    0.30
   3 -26   4    0.37    0.17
  -2 -27   4    0.39    0.26
   2  27  -4   -0.08    0.21
   0 -27  -4    2.48    0.31
  -1 -27  -4    0.47    0.25
  10   0  -5    0.00    0.15
 -10   0   5    0.04    0.26
  -9   0   5    2.71    0.32
  -9   0   5    3.26    0.27
  -8   0   5    0.08    0.14
  -8   0   5    0.10    0.18
  -8   0   5    0.24    0.22
  -7   0   5    0.06    0.13
  -7   0   5    0.23    0.14
  -7   0   5    0.35    0.19
  -7   0   5    0.08    0.15
  -6   0   5   -0.01    0.16
  -6   0   5    0.07    0.11
  -6   0   5    0.13    0.13
  -6   0   5    0.12    0.13
  -5   0   5    1.87    0.15
  -5   0   5    1.70    0.15
  -5   0   5    2.00    0.19
  -5   0   5    1.91    0.16
  -4   0   5    0.03    0.09
  -4   0   5    0.06    0.10
  -4   0   5    0.06    0.12
  -4   0   5    0.03    0.10
  -3   0   5    8.34    0.29
  -3   0   5    8.44    0.31
  -3   0   5    8.34    0.27
  -2   0   5    0.05    0.07
   2   0  -5   -0.01    0.04
  -2   0   5    0.07    0.08
  -1   0   5   27.76    0.71
  -1   0   5   25.60    0.64
   1   0  -5   27.13    0.66
   1   0  -5   26.14    0.71
   0   0  -5   -0.03    0.07
   0   0   5    0.12    0.05
   0   0  -5    0.05    0.08
   1   0   5   24.60    0.69
  -1   0  -5   24.99    0.65
  -1   0  -5   25.18    0.67
   1   0   5   25.54    0.59
  -2   0  -5    0.01    0.11
   2   0   5    0.06    0.04
   2   0   5   -0.01    0.08
  -2   0  -5    0.01    0.05
  -3   0  -5   57.28    1.45
   3   0   5   56.84    1.33
  -3   0  -5   57.98    1.46
   3   0   5   54.76    1.54
  -4   0  -5    0.15    0.15
   4   0   5   -0.04    0.06
  -4   0  -5    0.06    0.08
   5   0   5   97.21    2.29
  -5   0  -5   96.99    2.49
  -5   0  -5   98.35    2.49
   6   0   5   -0.03    0.07
  -6   0  -5   -0.07    0.17
  -6   0  -5    0.01    0.09
   7   0   5    1.15    0.12
  -7   0  -5    1.08    0.23
   7   0   5    1.34    0.20
  -8   0  -5    0.07    0.23
   8   0   5    0.12    0.18
   9   0   5    0.15    0.20
  -9   0  -5   -0.23    0.24
  10   0   5    0.12    0.22
 -10   0  -5    0.29    0.27
 -11   0  -5    1.97    0.34
  11   0   5    1.72    0.29
 -12   0  -5    0.70    0.32
 -11   1   5    0.71    0.32
  10  -1  -5    4.59    0.30
 -10   1   5    4.88    0.46
  -9  -1   5   -0.07    0.23
   9  -1  -5   -0.16    0.14
  -9  -1   5   -0.12    0.19
  -9   1   5   -0.27    0.23
  -8  -1   5    0.10    0.14
  -8  -1   5    0.17    0.15
   8  -1  -5    0.10    0.16
  -8  -1   5    0.26    0.18
  -8  -1   5    0.13    0.21
  -8   1   5    0.37    0.18
  -8   1   5    0.35    0.15
  -8   1   5    0.18    0.21
  -7  -1   5    0.08    0.19
  -7  -1   5    0.13    0.16
   7  -1  -5   -0.14    0.14
  -7  -1   5    0.14    0.14
  -7  -1   5    0.06    0.12
  -7   1   5   -0.07    0.13
  -7   1   5    0.15    0.16
  -7   1   5    0.15    0.19
  -6  -1   5   11.10    0.45
  -6  -1   5   10.88    0.36
  -6  -1   5   11.04    0.40
  -6  -1   5   11.03    0.38
  -6   1   5   10.51    0.39
  -6   1   5   10.25    0.45
  -6   1   5   10.07    0.36
  -5  -1   5    5.42    0.26
  -5  -1   5    5.05    0.30
  -5  -1   5    5.57    0.26
  -5  -1   5    5.80    0.24
  -5   1   5    4.94    0.26
  -5   1   5    5.79    0.31
  -5   1   5    4.54    0.23
  -4  -1   5    1.64    0.14
  -4  -1   5    1.48    0.14
   4  -1  -5    1.58    0.14
  -4  -1   5    1.43    0.13
  -4  -1   5    1.75    0.16
  -4   1   5    1.68    0.17
  -4   1   5    1.52    0.13
  -4   1   5    1.73    0.14
  -3  -1   5    1.32    0.12
  -3  -1   5    1.28    0.13
  -3  -1   5    1.35    0.10
   3  -1  -5    1.25    0.12
   3   1  -5    1.15    0.09
  -3   1   5    1.14    0.11
  -3   1   5    1.19    0.10
  -3   1   5    1.21    0.13
   2  -1  -5    1.84    0.15
   2  -1  -5    1.84    0.09
  -2  -1   5    1.91    0.14
  -2  -1   5    1.65    0.15
  -2  -1   5    2.19    0.13
  -2   1   5    1.82    0.14
  -2   1   5    1.75    0.15
   2   1  -5    1.96    0.10
   1  -1  -5   61.13    1.50
  -1  -1   5   59.26    1.43
  -1  -1   5   62.91    1.57
  -1   1   5   63.97    1.62
   1   1  -5   60.54    1.50
  -1   1   5   60.24    1.44
   0  -1   5    0.25    0.05
   0  -1   5    0.35    0.05
   0  -1  -5    0.31    0.09
   0  -1  -5    0.23    0.08
   0   1  -5    0.26    0.08
   0   1   5    0.33    0.06
   0   1  -5    0.29    0.07
   0   1   5    0.31    0.05
  -1  -1  -5    2.18    0.14
   1  -1   5    2.17    0.10
   1  -1   5    1.87    0.15
  -1  -1  -5    2.09    0.13
   1   1   5    2.37    0.09
  -1   1  -5    2.33    0.19
   1   1   5    2.50    0.15
  -1   1  -5    2.36    0.12
   2  -1   5   97.72    2.24
  -2  -1  -5   96.89    2.45
  -2  -1  -5   96.06    2.40
   2   1   5   93.82    2.56
   2   1   5   98.77    2.23
  -2   1  -5  100.86    2.44
  -2   1  -5   91.38    2.59
  -2   1  -5   98.79    2.40
  -3  -1  -5  109.24    2.83
   3  -1   5  114.90    2.64
  -3  -1  -5  114.36    2.88
   3   1   5  115.97    2.63
  -3   1  -5  108.69    2.83
  -3   1  -5  115.89    3.05
  -3   1  -5  117.82    2.86
   3   1   5  111.53    3.02
  -4  -1  -5    7.08    0.25
  -4  -1  -5    7.58    0.34
   4  -1   5    7.21    0.23
  -4   1  -5    7.03    0.34
  -4   1  -5    6.96    0.23
   4   1   5    7.06    0.22
   4   1   5    7.46    0.30
  -4   1  -5    7.28    0.36
  -5  -1  -5    0.42    0.16
   5  -1   5    0.53    0.08
  -5  -1  -5    0.43    0.10
   5   1   5    0.38    0.07
   5   1   5    0.47    0.13
  -5   1  -5    0.29    0.17
  -5   1  -5    0.45    0.09
  -5   1  -5    0.24    0.16
  -6  -1  -5    2.64    0.18
   6  -1   5    2.30    0.16
  -6  -1  -5    1.94    0.23
   6   1   5    2.22    0.20
   6   1   5    2.14    0.15
  -6   1  -5    2.35    0.16
  -6   1  -5    2.26    0.24
  -6   1  -5    1.93    0.25
   7  -1   5    2.24    0.17
  -7  -1  -5    1.94    0.26
  -7   1  -5    1.75    0.28
   7   1   5    2.02    0.14
  -7   1  -5    2.09    0.26
   7   1   5    1.85    0.22
   8  -1   5    5.75    0.25
  -8  -1  -5    5.64    0.41
   8   1   5    5.68    0.37
  -8   1  -5    5.26    0.41
   9  -1   5    2.70    0.28
  -9  -1  -5    2.47    0.32
  -9   1  -5    3.17    0.34
   9   1   5    2.81    0.28
 -10  -1  -5    0.02    0.26
  10  -1   5    0.17    0.22
 -10   1  -5   -0.09    0.26
  10   1   5    0.01    0.21
 -11  -1  -5    4.68    0.44
  11  -1   5    4.68    0.41
 -11   1  -5    5.68    0.47
  11   1   5    5.08    0.41
 -12  -1  -5    2.39    0.38
 -11   2   5    2.76    0.39
  10  -2  -5    2.97    0.25
 -10   2   5    2.97    0.37
   9  -2  -5    4.35    0.29
  -9  -2   5    4.46    0.29
  -9  -2   5    4.78    0.35
  -9  -2   5    5.39    0.30
  -9   2   5    4.46    0.39
  -8  -2   5   -0.08    0.15
   8  -2  -5   -0.05    0.16
  -8  -2   5   -0.08    0.20
  -8  -2   5   -0.12    0.18
  -8  -2   5    0.15    0.14
  -8   2   5    0.04    0.17
  -8   2   5   -0.09    0.22
  -7  -2   5    0.19    0.12
   7  -2  -5    0.13    0.15
  -7  -2   5    0.16    0.19
  -7  -2   5    0.07    0.14
  -7  -2   5    0.30    0.17
  -7   2   5    0.20    0.15
  -7   2   5    0.18    0.14
  -7   2   5    0.15    0.19
  -6  -2   5    0.15    0.13
   6  -2  -5    0.15    0.12
  -6  -2   5    0.09    0.11
  -6  -2   5    0.41    0.14
  -6  -2   5    0.18    0.16
  -6   2   5    0.20    0.14
  -6   2   5    0.07    0.16
  -6   2   5    0.15    0.12
  -5  -2   5   24.55    0.77
   5  -2  -5   24.60    0.72
  -5  -2   5   25.94    0.71
  -5  -2   5   25.58    0.73
  -5  -2   5   24.56    0.66
  -5   2   5   25.51    0.68
  -5   2   5   25.92    0.70
  -5   2   5   24.90    0.78
  -4  -2   5    2.19    0.17
  -4  -2   5    2.44    0.19
  -4  -2   5    2.25    0.18
   4  -2  -5    2.17    0.19
  -4   2   5    2.39    0.19
  -4   2   5    2.12    0.15
  -4   2   5    2.38    0.19
  -3  -2   5    6.07    0.25
  -3  -2   5    6.47    0.26
  -3  -2   5    6.14    0.23
   3  -2  -5    6.44    0.24
  -3   2   5    6.54    0.23
   3   2  -5    6.43    0.21
  -3   2   5    6.24    0.27
  -3   2   5    6.25    0.23
   2  -2  -5    1.78    0.15
  -2  -2   5    1.72    0.15
  -2  -2   5    1.57    0.12
  -2  -2   5    1.59    0.14
   2  -2  -5    1.54    0.08
  -2   2   5    1.72    0.14
   2   2  -5    1.41    0.10
  -2   2   5    1.66    0.15
   1  -2  -5  101.92    2.59
  -1  -2   5   96.90    2.36
  -1  -2   5  101.72    2.59
  -1   2   5  105.28    2.68
   1   2  -5  104.70    2.53
  -1   2   5  102.18    2.37
   0  -2   5    0.45    0.06
   0  -2  -5    0.38    0.09
   0  -2   5    0.47    0.07
   0  -2   5    0.49    0.06
   0  -2  -5    0.26    0.09
   0   2   5    0.38    0.07
   0   2  -5    0.40    0.08
   0   2   5    0.38    0.06
   1  -2   5   23.97    0.58
  -1  -2  -5   24.52    0.64
  -1  -2  -5   25.05    0.65
  -1   2  -5   24.39    0.69
   1   2   5   24.18    0.67
   1   2   5   23.59    0.57
  -1   2  -5   24.15    0.64
   2  -2   5   13.80    0.35
  -2  -2  -5   13.62    0.43
  -2  -2  -5   13.81    0.39
  -2   2  -5   13.81    0.36
   2   2   5   13.87    0.33
  -2   2  -5   13.46    0.45
   2   2   5   14.14    0.42
  -2   2  -5   13.80    0.42
   3  -2   5    5.53    0.18
  -3  -2  -5    5.27    0.27
  -3  -2  -5    4.81    0.20
   3   2   5    5.06    0.24
  -3   2  -5    5.28    0.27
  -3   2  -5    5.68    0.30
   3   2   5    4.70    0.15
  -3   2  -5    5.25    0.16
  -4  -2  -5    7.79    0.27
  -4  -2  -5    8.06    0.36
   4  -2   5    7.94    0.25
   4   2   5    7.99    0.32
  -4   2  -5    8.41    0.38
  -4   2  -5    8.02    0.24
   4   2   5    7.92    0.23
  -4   2  -5    7.86    0.35
   5  -2   5   42.46    1.03
  -5  -2  -5   41.90    1.16
  -5  -2  -5   42.81    1.12
   5   2   5   42.21    1.20
  -5   2  -5   42.69    1.10
   5   2   5   43.23    1.01
  -5   2  -5   40.85    1.15
  -5   2  -5   41.49    1.25
   6  -2   5    2.40    0.16
  -6  -2  -5    2.12    0.18
  -6  -2  -5    2.37    0.24
  -6   2  -5    2.06    0.26
  -6   2  -5    2.11    0.24
   6   2   5    2.08    0.20
   6   2   5    2.21    0.15
   7  -2   5   16.35    0.47
  -7  -2  -5   16.24    0.51
  -7  -2  -5   15.47    0.60
   7   2   5   16.23    0.58
  -7   2  -5   15.86    0.66
  -7   2  -5   16.60    0.60
  -8  -2  -5    8.85    0.47
   8  -2   5    9.29    0.33
  -8   2  -5    9.43    0.54
   8   2   5    9.05    0.44
  -8   2  -5   10.00    0.48
  -9  -2  -5    1.91    0.30
  -9   2  -5    1.58    0.30
   9   2   5    1.93    0.25
  10  -2   5   10.84    0.52
 -10  -2  -5   11.22    0.56
  10   2   5   10.73    0.51
 -10   2  -5   11.04    0.56
  11  -2   5    2.28    0.31
 -11  -2  -5    2.03    0.35
  11   2   5    2.04    0.30
 -11   2  -5    2.65    0.37
  11  -3  -5   -0.18    0.17
 -11   3   5   -0.04    0.30
  10  -3  -5    0.39    0.17
 -10   3   5    0.32    0.28
  -9  -3   5    2.38    0.24
   9  -3  -5    1.97    0.21
   9   3  -5    2.21    0.22
  -9   3   5    2.06    0.31
  -8  -3   5    0.81    0.20
   8  -3  -5    0.60    0.16
  -8  -3   5    0.63    0.15
   8  -3  -5    0.89    0.17
  -8  -3   5    0.41    0.17
  -8   3   5    0.53    0.24
  -7  -3   5    0.37    0.13
   7  -3  -5    0.73    0.15
  -7  -3   5    0.68    0.18
  -7  -3   5    0.55    0.16
  -7   3   5    0.58    0.17
  -7   3   5    0.29    0.15
  -7   3   5    0.67    0.21
   6  -3  -5    5.07    0.24
  -6  -3   5    4.44    0.25
  -6  -3   5    4.63    0.28
  -6  -3   5    4.77    0.32
  -6  -3   5    4.44    0.23
  -6   3   5    4.67    0.32
  -6   3   5    4.47    0.25
  -6   3   5    4.90    0.28
  -5  -3   5    2.33    0.20
   5  -3  -5    3.10    0.19
  -5  -3   5    2.61    0.20
  -5  -3   5    2.71    0.17
  -5   3   5    2.37    0.20
  -5   3   5    2.81    0.22
  -5   3   5    2.37    0.21
  -4  -3   5    9.91    0.37
   4  -3  -5   10.03    0.34
  -4  -3   5   10.35    0.31
  -4  -3   5   10.12    0.35
  -4   3   5   10.52    0.34
  -4   3   5   10.18    0.33
   4   3  -5   10.17    0.32
  -4   3   5    9.56    0.39
  -3  -3   5    0.05    0.09
  -3  -3   5   -0.16    0.07
  -3  -3   5   -0.03    0.09
   3  -3  -5   -0.02    0.10
  -3   3   5   -0.03    0.10
   3   3  -5   -0.05    0.06
  -3   3   5   -0.16    0.08
  -3   3   5    0.02    0.07
   2  -3  -5   11.03    0.34
  -2  -3   5   10.66    0.34
  -2  -3   5   10.88    0.30
   2   3  -5   10.49    0.31
  -2   3   5   11.04    0.32
  -2   3   5   11.36    0.35
  -1  -3   5   49.05    1.25
   1  -3  -5   47.11    1.25
  -1  -3   5   46.61    1.13
  -1   3   5   47.96    1.14
  -1   3   5   49.01    1.29
   1   3  -5   49.78    1.20
   0  -3   5   -0.12    0.05
   0  -3  -5    0.25    0.10
   0  -3   5   -0.18    0.07
   0  -3  -5   -0.18    0.09
   0   3   5    0.03    0.06
   0   3  -5   -0.09    0.07
   0   3   5   -0.06    0.07
   0   3  -5   -0.09    0.07
  -1  -3  -5    0.25    0.08
  -1  -3  -5    0.32    0.11
   1  -3   5    0.47    0.05
   1  -3   5    0.36    0.05
   1   3   5    0.38    0.04
[truncated: 1,426,368 more chars]
